# Supplementary material
Source: publisher figshare collection journal article supplement (https://acs.figshare.com/ndownloader/files/24166043)
Supplement: Supplementary file 1 [file 24166043]

## Sheet: TMT 5Plex_Protein_list
Checked	Protein FDR Confidence: Combined	Master	Accession	Description	Exp. q-value: Combined	Contaminant	Sum PEP Score	Coverage [%]	# Peptides	# PSMs	# Unique Peptides	# AAs	MW [kDa]	calc. pI	Score Sequest HT: Sequest HT	# Peptides (by Search Engine): Sequest HT	Biological Process	Cellular Component	Molecular Function	Pfam IDs	Entrez Gene ID	Ensembl Gene ID	Gene Symbol	Chromosome	KEGG Pathways	WikiPathways	Reactome Pathways	# Protein Pathway Groups	# Razor Peptides	Abundance Ratio: (F1, 127) / (F1, 126)	Abundance Ratio: (F1, 128) / (F1, 126)	Abundance Ratio: (F1, 129) / (F1, 126)	Abundance Ratio: (F1, 130) / (F1, 126)	Abundance Ratio: (F1, 131) / (F1, 126)	Abundance Ratio: (F2, 127) / (F2, 126)	Abundance Ratio: (F2, 128) / (F2, 126)	Abundance Ratio: (F2, 129) / (F2, 126)	Abundance Ratio: (F2, 130) / (F2, 126)	Abundance Ratio: (F2, 131) / (F2, 126)	Abundance Ratio: (F3, 127) / (F3, 126)	Abundance Ratio: (F3, 128) / (F3, 126)	Abundance Ratio: (F3, 129) / (F3, 126)	Abundance Ratio: (F3, 130) / (F3, 126)	Abundance Ratio: (F3, 131) / (F3, 126)	Abundance Ratio: (F4, 127) / (F4, 126)	Abundance Ratio: (F4, 128) / (F4, 126)	Abundance Ratio: (F4, 129) / (F4, 126)	Abundance Ratio: (F4, 130) / (F4, 126)	Abundance Ratio: (F4, 131) / (F4, 126)
TRUE	High	Master Protein	P16086	Spectrin alpha chain, non-erythrocytic 1 OS=Rattus norvegicus GN=Sptan1 PE=1 SV=2	0	FALSE	760.133	33	80	1161	80	2472	284.5	5.33	4595.14	80	cell organization and biogenesis;regulation of biological process	cytoplasm;cytoskeleton;cytosol;membrane	metal ion binding;protein binding	Pf00018, Pf00036, Pf00435, Pf07653, Pf08239, Pf08726, Pf13405, Pf13499, Pf14604	64159	ENSRNOG00000015396.7	Sptan1	3	Tight junction; Apoptosis	FAS pathway and Stress induction of HSP regulation	Neutrophil degranulation; Interaction between L1 and Ankyrins; NCAM signaling for neurite out-growth; RAF/MAP kinase cascade; Caspase-mediated cleavage of cytoskeletal proteins; Interleukin-20 family signaling; COPI-mediated anterograde transport	31	0	0.946	0.984	1.022	0.968	0.879	0.97	0.991	1.006	0.942	0.968	0.975	0.96	1.003	0.939	0.721	0.95	0.972	1.012	0.929	1.105
TRUE	High	Master Protein	P11442	Clathrin heavy chain 1 OS=Rattus norvegicus GN=Cltc PE=1 SV=3	0	FALSE	682.726	32	43	1035	43	1675	191.5	5.72	4460.37	43	cell differentiation;cell organization and biogenesis;metabolic process;regulation of biological process;transport	cytoplasm;cytoskeleton;cytosol;endosome;membrane;mitochondrion;vacuole	protein binding;RNA binding;structural molecule activity	Pf00637, Pf01394, Pf04053, Pf09268, Pf13838	54241		Cltc	10	Synaptic vesicle cycle; Endocytosis; Bacterial invasion of epithelial cells; Endocrine and other factor-regulated calcium reabsorption; Huntington's disease; Lysosome	Kit Receptor Signaling Pathway		7	0	1.061	0.988	1.008	1.044	0.924	1.043	0.994	1.01	1.038	1.163	1.033	1.014	1.042	1.088	1.143	1.062	1.007	1.041	1.084	0.956
TRUE	High	Master Protein	F1MA36	Spectrin beta 3 OS=Rattus norvegicus GN=Sptbn2 PE=4 SV=2	0	FALSE	566.153	33	58	595	55	2388	270.8	5.83	2589.17	58	cell organization and biogenesis;regulation of biological process;response to stimulus;transport	cytoplasm;cytoskeleton;cytosol;endosome;membrane	protein binding;structural molecule activity	Pf00169, Pf00307, Pf00435, Pf11971, Pf15410	29211	ENSRNOG00000058842.1	Sptbn2	1			RAF/MAP kinase cascade; MHC class II antigen presentation; Interleukin-20 family signaling; Interaction between L1 and Ankyrins; COPI-mediated anterograde transport; NCAM signaling for neurite out-growth	23	3	0.93	1.011	1.033	0.985	0.981	0.915	1.006	1.022	0.992	1.03	0.911	0.957	0.984	0.97	0.198	0.921	0.978	0.998	0.971	0.861
TRUE	High	Master Protein	M0R9X8	Cytoplasmic dynein 1 heavy chain 1 OS=Rattus norvegicus GN=Dync1h1 PE=4 SV=1	0	FALSE	564.071	18	72	609	4	4645	531.8	6.51	2427.59	72	cellular component movement	cytoplasm	catalytic activity;motor activity;nucleotide binding;protein binding	Pf00769, Pf03028, Pf03915, Pf04156, Pf07246, Pf07728, Pf08385, Pf08393, Pf12774, Pf12775, Pf12777, Pf12780, Pf12781, Pf13173, Pf13207, Pf13401								0	75	1.058	0.979	1.012	0.957	1.161	1.05	0.986	1.005	0.936	0.81	1.005	0.984	0.995	0.956	0.71	1.031	0.981	1.013	0.931	1.269
TRUE	High	Master Protein	P38650	Cytoplasmic dynein 1 heavy chain 1 OS=Rattus norvegicus GN=Dync1h1 PE=1 SV=1	0	FALSE	541.698	17	69	606	1	4644	531.9	6.46	2395.84	69	cell division;cell organization and biogenesis;cellular component movement;regulation of biological process;response to stimulus;transport	cytoplasm;cytoskeleton;membrane	catalytic activity;motor activity;nucleotide binding;protein binding;RNA binding	Pf03028, Pf04156, Pf07246, Pf07728, Pf08385, Pf08393, Pf12774, Pf12775, Pf12777, Pf12780, Pf12781, Pf13173, Pf13207, Pf13401	29489		Dync1h1	6	Phagosome; Vasopressin-regulated water reabsorption; Salmonella infection			3	0	0.878	1.049	1.072	1.059	1.884	0.812	1.116	1.049	1.033	1.763	0.759	1.258	0.927	0.814	0.01	0.82	1.393	1.012	0.894	0.01
TRUE	High	Master Protein	G3V6S0	Protein Sptbn1 OS=Rattus norvegicus GN=Sptbn1 PE=4 SV=2	0	FALSE	524.986	25	55	727	50	2357	273.3	5.72	2791.11	55			protein binding	Pf00169, Pf00307, Pf00435, Pf11971, Pf12128, Pf15410								0	2	0.978	1.058	0.994	1.062	0.93	0.927	1.083	1.004	1.087	1.19	0.98	1.021	0.998	0.972	0.85	0.974	1.008	1.003	1.024	0.582
TRUE	High	Master Protein	Q3KRE8	Tubulin beta-2B chain OS=Rattus norvegicus GN=Tubb2b PE=1 SV=1	0	FALSE	519.7	69	25	2746	1	445	49.9	4.89	11068	25	cell organization and biogenesis;cellular component movement;regulation of biological process	cytoplasm;cytoskeleton;nucleus	catalytic activity;nucleotide binding;protein binding;structural molecule activity	Pf00091, Pf03953, Pf10644	291081	ENSRNOG00000017445.5	Tubb2b	17	Gap junction; Phagosome		Hedgehog 'on' state; Hedgehog 'off' state; Intraflagellar transport	9	1
TRUE	High	Master Protein	P85108	Tubulin beta-2A chain OS=Rattus norvegicus GN=Tubb2a PE=1 SV=1	0	FALSE	518.887	69	25	2755	2	445	49.9	4.89	11139.7	25	cell organization and biogenesis	cytoplasm;cytoskeleton;nucleus	catalytic activity;nucleotide binding;structural molecule activity	Pf00091, Pf03953, Pf10644	498736	ENSRNOG00000017558.6	Tubb2a	17	Gap junction; Phagosome		Hedgehog 'on' state; Hedgehog 'off' state; Intraflagellar transport	9	32	1.023	0.967	0.998	0.953	0.887	1.015	0.96	1.014	0.968	0.822	1.034	0.936	1	0.904	0.608	1.039	0.942	1.01	0.925	0.697
TRUE	High	Master Protein	B4F7C2	Protein Tubb4a OS=Rattus norvegicus GN=Tubb4a PE=2 SV=1	0	FALSE	495.644	68	24	2621	3	444	49.6	4.88	10437.4	24	cell organization and biogenesis;regulation of biological process	cytoplasm;cytoskeleton;nucleus	catalytic activity;metal ion binding;nucleotide binding;structural molecule activity	Pf00091, Pf03953, Pf10644	29213	ENSRNOG00000047505.2	Tubb4a	9	Gap junction; Phagosome		Regulation of PLK1 Activity at G2/M Transition; Hedgehog 'off' state; AURKA Activation by TPX2; Recruitment of mitotic centrosome proteins and complexes; Recruitment of NuMA to mitotic centrosomes; Loss of Nlp from mitotic centrosomes; Hedgehog 'on' state; Anchoring of the basal body to the plasma membrane; Intraflagellar transport	23	3	0.934	0.911	0.924	1.07	1.174	0.926	0.901	0.918	1.074	0.867	0.901	0.924	0.979	1.088	1.19	0.911	0.883	0.949	1.057	0.76
TRUE	High	Master Protein	P69897	Tubulin beta-5 chain OS=Rattus norvegicus GN=Tubb5 PE=1 SV=1	0	FALSE	492.241	64	24	2695	1	444	49.6	4.89	10773.5	24	cell organization and biogenesis	cytoplasm;cytoskeleton;membrane;nucleus	catalytic activity;nucleotide binding;protein binding;structural molecule activity	Pf00091, Pf03953, Pf10644	29214	ENSRNOG00000061216.1	Tubb5	20	Phagosome; Gap junction		Regulation of PLK1 Activity at G2/M Transition; AURKA Activation by TPX2; Neutrophil degranulation; Recruitment of mitotic centrosome proteins and complexes; Recruitment of NuMA to mitotic centrosomes; Loss of Nlp from mitotic centrosomes; Anchoring of the basal body to the plasma membrane	21	3	1.058	0.91	0.885	0.831	0.574	1.041	0.896	0.919	0.823	0.739	1.037	0.852	0.982	0.752	0.268	1.009	0.852	0.963	0.78	0.933
TRUE	High	Master Protein	Q4QRB4	Tubulin beta-3 chain OS=Rattus norvegicus GN=Tubb3 PE=1 SV=1	0	FALSE	440.786	54	23	1626	6	450	50.4	4.93	6201.49	23	cell differentiation;cell organization and biogenesis;cellular component movement	cytoplasm;cytoskeleton;nucleus	catalytic activity;nucleotide binding;structural molecule activity	Pf00091, Pf03953, Pf10644	246118	ENSRNOG00000017209.6	Tubb3	19	Phagosome; Gap junction		Hedgehog 'on' state; Hedgehog 'off' state; Intraflagellar transport	9	4	1.049	0.953	1.045	0.826	0.972	1.03	0.973	1.036	0.839	0.952	1.049	0.939	1.01	0.815	0.76	1.053	0.942	1.036	0.837	0.494
TRUE	High	Master Protein	P47942	Dihydropyrimidinase-related protein 2 OS=Rattus norvegicus GN=Dpysl2 PE=1 SV=1	0	FALSE	421.586	44	18	690	17	572	62.2	6.38	3384.29	18	cell differentiation;cell organization and biogenesis;cellular component movement;development;regulation of biological process;response to stimulus;transport	cytoplasm;cytoskeleton;cytosol;membrane;mitochondrion	catalytic activity;protein binding	Pf01979, Pf07969, Pf13147, Pf13594	25416	ENSRNOG00000009625.6	Dpysl2	15	Axon guidance		Recycling pathway of L1; CRMPs in Sema3A signaling	7	1	0.978	1.02	0.999	0.962	0.951	0.966	0.994	0.959	0.975	0.659	1.015	1.145	1.022	0.932	0.286	1.028	1.124	1.017	0.932	0.823
TRUE	High	Master Protein	P10719	ATP synthase subunit beta, mitochondrial OS=Rattus norvegicus GN=Atp5b PE=1 SV=2	0	FALSE	418.988	49	15	1094	15	529	56.3	5.34	4681.9	15	cell differentiation;cellular homeostasis;metabolic process;regulation of biological process;transport	cell surface;membrane;mitochondrion;nucleus	catalytic activity;metal ion binding;nucleotide binding;protein binding;receptor activity;transporter activity	Pf00006, Pf00306, Pf02874	171374		Atp5b	7	Huntington's disease; Alzheimer's disease; Metabolic pathways; Parkinson's disease; Oxidative phosphorylation	Oxidative phosphorylation; Electron Transport Chain		7	0	1.016	0.972	0.988	1.013	0.822	0.993	0.965	0.989	1.003	1.058	0.991	0.994	0.984	0.987	1.025	0.98	0.972	0.986	0.987	0.987
TRUE	High	Master Protein	P60711	Actin, cytoplasmic 1 OS=Rattus norvegicus GN=Actb PE=1 SV=1	0	FALSE	403.913	54	19	1532	7	375	41.7	5.48	7195	19	cell organization and biogenesis;response to stimulus	cytoplasm;cytoskeleton;cytosol;membrane;nucleus	DNA binding;nucleotide binding;protein binding	Pf00022	81822	ENSRNOG00000034254.4	Actb	12	Platelet activation; Influenza A; Tight junction; Dilated cardiomyopathy; Proteoglycans in cancer; Viral myocarditis; Focal adhesion; Thyroid hormone signaling pathway; Salmonella infection; Adherens junction; Gastric acid secretion; Rap1 signaling pathway; Hippo signaling pathway; Leukocyte transendothelial migration; Apoptosis; Hypertrophic cardiomyopathy (HCM); Bacterial invasion of epithelial…	Myometrial Relaxation and Contraction Pathways; Focal Adhesion; Regulation of Actin Cytoskeleton	VEGFA-VEGFR2 Pathway; Adherens junctions interactions; Formation of annular gap junctions; Regulation of actin dynamics for phagocytic cup formation; RHO GTPases Activate Formins; Cell-extracellular matrix interactions; UCH proteinases; RHO GTPases Activate WASPs and WAVEs; Interaction between L1 and Ankyrins; Recycling pathway of L1; RHO GTPases activate IQGAPs; B-WICH complex positively regulat…	68	12	0.951	1.009	0.99	1.06	1.11	0.935	0.988	1.006	1.082	1.049	0.96	0.991	1.003	1.037	0.649	0.941	0.964	0.998	1.052	0.669
TRUE	High	Master Protein	Q6P9T8	Tubulin beta-4B chain OS=Rattus norvegicus GN=Tubb4b PE=1 SV=1	0	FALSE	400.66	67	23	2068	1	445	49.8	4.89	7261.82	23	cell organization and biogenesis	cytoplasm;cytoskeleton;nucleus	catalytic activity;nucleotide binding;protein binding;RNA binding;structural molecule activity	Pf00091, Pf03953, Pf10644	296554		Tubb4b	3	Gap junction; Phagosome			2	0	0.917	0.966	1.045	0.984	1.615	0.833	0.827	1.015	0.934	0.998	0.817	0.774	0.97	0.904	4.126	0.717	0.748	1.033	0.875	0.01
TRUE	High	Master Protein	Q6AYZ1	Tubulin alpha-1C chain OS=Rattus norvegicus GN=Tuba1c PE=1 SV=1	0	FALSE	377.109	45	19	1490	1	449	49.9	5.1	6515.12	19	cell organization and biogenesis	cytoplasm;cytoskeleton;membrane;nucleus	catalytic activity;nucleotide binding;structural molecule activity	Pf00091, Pf03953	300218; 100909441	ENSRNOG00000021438.3	Tuba1c; LOC100909441	7; 2	Gap junction; Phagosome; Apoptosis		Hedgehog 'on' state; Hedgehog 'off' state; Intraflagellar transport	10	22	1.058	0.982	1.008	1.081	1.276	1.054	0.993	1.011	1.091	1.365	1.036	0.984	0.995	1.115	1.275	1.043	1	1.003	1.119	1.317
TRUE	High	Master Protein	Q5XIF6	Tubulin alpha-4A chain OS=Rattus norvegicus GN=Tuba4a PE=2 SV=1	0	FALSE	377.083	46	19	1389	5	448	49.9	5.06	6129.55	19	cell organization and biogenesis	cytoplasm;cytoskeleton	catalytic activity;nucleotide binding;protein binding;structural molecule activity	Pf00091, Pf03953	316531	ENSRNOG00000003597.5	Tuba4a	9	Apoptosis; Gap junction; Phagosome		Regulation of PLK1 Activity at G2/M Transition; Hedgehog 'off' state; AURKA Activation by TPX2; Recruitment of mitotic centrosome proteins and complexes; Loss of Nlp from mitotic centrosomes; Anchoring of the basal body to the plasma membrane; Platelet degranulation ; Recruitment of NuMA to mitotic centrosomes; Hedgehog 'on' state; Intraflagellar transport	28	0	0.961	0.801	0.964	0.911	1.346	0.971	0.854	1.005	0.903	1.154	0.932	0.818	0.991	0.933	1.18	0.918	0.815	0.959	0.885	0.69
TRUE	High	Master Protein	P15999	ATP synthase subunit alpha, mitochondrial OS=Rattus norvegicus GN=Atp5a1 PE=1 SV=2	0	FALSE	369.521	56	27	922	27	553	59.7	9.19	4118.76	27	metabolic process;regulation of biological process;transport	membrane;mitochondrion	catalytic activity;nucleotide binding;protein binding;RNA binding;transporter activity	Pf00006, Pf00306, Pf02663, Pf02874, Pf05943	65262		Atp5a1	18	Alzheimer's disease; Parkinson's disease; Oxidative phosphorylation; Huntington's disease; Metabolic pathways	Oxidative phosphorylation; Electron Transport Chain		7	0	1.034	0.931	0.932	0.945	0.91	1.044	0.924	0.926	0.906	0.926	1.015	0.91	0.949	0.895	0.838	1.042	0.904	0.962	0.894	0.726
TRUE	High	Master Protein	D4A133	Protein Atp6v1a OS=Rattus norvegicus GN=Atp6v1a PE=3 SV=1	0	FALSE	344.722	45	22	826	22	617	68.2	5.58	3002.59	22	cellular homeostasis;metabolic process;response to stimulus;transport	cytosol;membrane;mitochondrion	catalytic activity;nucleotide binding;transporter activity	Pf00006, Pf00306, Pf02874	685232	ENSRNOG00000001992.6	Atp6v1a	11	Phagosome; Oxidative phosphorylation; Collecting duct acid secretion; Rheumatoid arthritis; Synaptic vesicle cycle; mTOR signaling pathway; Metabolic pathways	Proximal Tubule Transporters	Ion channel transport; Transferrin endocytosis and recycling; Insulin receptor recycling; ROS, RNS production in phagocytes	19	0	1.039	1.035	1.04	1.004	0.889	1.013	1.022	1.04	0.991	0.995	1.021	1.043	1.036	1.009	1.838	1.01	1.075	1.047	1.034	1.309
TRUE	High	Master Protein	P06687	Sodium/potassium-transporting ATPase subunit alpha-3 OS=Rattus norvegicus GN=Atp1a3 PE=1 SV=2	0	FALSE	343.287	29	27	745	15	1013	111.6	5.41	3294.22	27	cellular homeostasis;regulation of biological process;response to stimulus;transport	cytoplasm;endoplasmic reticulum;Golgi;membrane;nucleus	catalytic activity;metal ion binding;nucleotide binding;protein binding;transporter activity	Pf00122, Pf00689, Pf00690, Pf00702, Pf08282, Pf12710, Pf13246	24213	ENSRNOG00000020263.6	Atp1a3	1	Protein digestion and absorption; Bile secretion; Endocrine and other factor-regulated calcium reabsorption; Carbohydrate digestion and absorption; Mineral absorption; Insulin secretion; Aldosterone-regulated sodium reabsorption; Gastric acid secretion; Pancreatic secretion; cGMP-PKG signaling pathway; cAMP signaling pathway; Salivary secretion; Proximal tubule bicarbonate reclamation; Thyroid ho…		Ion homeostasis; Ion transport by P-type ATPases	23	1	1.005	0.895	0.952	1.055	1.339	1.024	0.959	0.959	1.02	1.254	0.968	0.895	0.961	0.993	0.715	0.951	0.885	0.932	0.983	0.791
TRUE	High	Master Protein	F7F9U6	Plectin OS=Rattus norvegicus GN=Plec PE=4 SV=1	0	FALSE	328.524	15	55	286	55	4544	517.1	5.76	976.57	55	cell differentiation;cell organization and biogenesis;response to stimulus	cytoplasm;cytoskeleton;cytosol;membrane	protein binding;RNA binding;structural molecule activity	Pf00307, Pf00681, Pf07812, Pf11971	64204	ENSRNOG00000023781.7	Plec	7		Alpha6-Beta4 Integrin Signaling Pathway; EGFR1 Signaling Pathway	Assembly of collagen fibrils and other multimeric structures; Caspase-mediated cleavage of cytoskeletal proteins; Type I hemidesmosome assembly	13	0	1.04	1.042	1.077	1.051	1.231	1.019	0.998	1.036	1.024	1.016	1.011	1.038	1.074	1.033	0.985	1.023	0.993	1	0.981	1.185
TRUE	High	Master Protein	G3V936	Citrate synthase OS=Rattus norvegicus GN=Cs PE=3 SV=1	0	FALSE	309.569	27	8	589	8	466	51.8	8.41	3046.1	8	metabolic process	mitochondrion;nucleus;organelle lumen	catalytic activity;RNA binding	Pf00285		ENSRNOG00000023520.5		7			Citric acid cycle (TCA cycle)	4	0	1.029	0.959	1.008	0.965	1.055	1.004	0.958	1.019	0.977	0.923	1.028	1.02	1.017	1.03	0.717	1.035	1.007	0.993	0.975	0.466
TRUE	High	Master Protein	P21575	Dynamin-1 OS=Rattus norvegicus GN=Dnm1 PE=1 SV=2	0	FALSE	305.08	42	37	612	27	864	97.2	6.87	2046.36	37	cell communication;cell organization and biogenesis;metabolic process;regulation of biological process;response to stimulus;transport	cytoplasm;cytoskeleton;Golgi;membrane	catalytic activity;nucleotide binding;protein binding;RNA binding	Pf00169, Pf00350, Pf01031, Pf02212	140694	ENSRNOG00000033835.6	Dnm1	3	Phospholipase D signaling pathway; Endocrine and other factor-regulated calcium reabsorption; Synaptic vesicle cycle; Bacterial invasion of epithelial cells; Endocytosis	IL-3 Signaling Pathway; Angiotensin signaling in thick ascending limbs; EGFR1 Signaling Pathway		8	11	0.919	1.007	0.997	0.938	0.829	0.876	0.981	0.998	0.883	0.783	0.932	0.976	0.971	0.898	0.394	0.912	0.968	0.962	0.875	0.689
TRUE	High	Master Protein	G3V7U2	Microtubule-associated protein 1 A, isoform CRA_c OS=Rattus norvegicus GN=Map1a PE=4 SV=1	0	FALSE	300.68	17	35	304	1	2776	299.5	4.94	1448	35	cell organization and biogenesis;regulation of biological process	cytoplasm;cytosol	protein binding		25152	ENSRNOG00000014230.6	Map1a	3				0	34	1.005	0.996	1.039	1.005	1.06	0.98	0.968	1.038	1.067	0.962	0.994	0.933	1.003	1.045	0.289	0.977	0.893	0.961	1.007	0.23
TRUE	High	Master Protein	P34926	Microtubule-associated protein 1A OS=Rattus norvegicus GN=Map1a PE=1 SV=1	0	FALSE	300.604	17	35	303	1	2774	299.3	4.94	1442.88	35	cell organization and biogenesis;regulation of biological process	cytoplasm;cytoskeleton;cytosol	protein binding		25152		Map1a	3				0	0																0.915	0.918	0.976	0.9	2.364
TRUE	High	Master Protein	P12785	Fatty acid synthase OS=Rattus norvegicus GN=Fasn PE=1 SV=3	0	FALSE	287.953	17	32	234	31	2505	272.5	6.39	1037.85	32	cell differentiation;metabolic process;response to stimulus	cytoplasm;cytosol;Golgi;membrane;mitochondrion	catalytic activity;nucleotide binding;protein binding;RNA binding	Pf00106, Pf00107, Pf00109, Pf00698, Pf00975, Pf02801, Pf08241, Pf08242, Pf08659, Pf12847, Pf13489, Pf13602, Pf13847, Pf14765	50671	ENSRNOG00000045636.2	Fasn	10	Fatty acid biosynthesis; Metabolic pathways; AMPK signaling pathway; Insulin signaling pathway; Fatty acid metabolism	Fatty Acid Biosynthesis	Vitamin B5 (pantothenate) metabolism; ChREBP activates metabolic gene expression; Fatty acyl-CoA biosynthesis	15	1	1.057	0.969	0.997	0.983	1.069	1.107	1.002	1.027	0.959	0.757	1.028	0.99	0.996	1.008	1.749	1.045	1	1.028	1.027	1.046
TRUE	High	Master Protein	Q9ER34	Aconitate hydratase, mitochondrial OS=Rattus norvegicus GN=Aco2 PE=1 SV=2	0	FALSE	284.786	33	19	392	19	780	85.4	7.83	1686.49	19	metabolic process;response to stimulus	mitochondrion	catalytic activity;metal ion binding;protein binding	Pf00330, Pf00694	79250	ENSRNOG00000024128.6	Aco2	7	Biosynthesis of amino acids; Carbon metabolism; 2-Oxocarboxylic acid metabolism; Metabolic pathways; Citrate cycle (TCA cycle); Glyoxylate and dicarboxylate metabolism	TCA Cycle	Citric acid cycle (TCA cycle)	11	0	0.928	1.039	0.999	0.974	0.698	0.882	0.982	0.992	0.937	0.76	0.966	0.956	0.988	1.016	0.748	0.974	0.991	0.994	0.984	1.26
TRUE	High	Master Protein	Q52KS1	6-phosphofructokinase OS=Rattus norvegicus GN=Pfkm PE=2 SV=1	0	FALSE	283.675	29	17	419	3	780	85.3	7.88	1818.05	17	cell organization and biogenesis;cellular homeostasis;metabolic process;regulation of biological process	cytoplasm;cytosol;membrane	catalytic activity;metal ion binding;nucleotide binding;protein binding	Pf00365	65152	ENSRNOG00000057988.1	Pfkm	7		Glycolysis and Gluconeogenesis; Hexoses metabolism in proximal tubules; Insulin Signaling	Glycolysis	7	19	1.041	1.031	1.035	1.037	0.736	1.029	1.054	0.996	0.984	0.789	1.069	1.062	1.024	0.996	0.551	1.08	1.048	1.05	1.008	0.546
TRUE	High	Master Protein	P07335	Creatine kinase B-type OS=Rattus norvegicus GN=Ckb PE=1 SV=2	0	FALSE	283.423	38	12	686	11	381	42.7	5.67	3043.27	12	cellular homeostasis;metabolic process	cytoplasm;cytosol;mitochondrion;nucleus	catalytic activity;nucleotide binding;protein binding	Pf00217, Pf02807	24264	ENSRNOG00000010872.5	Ckb	6	Arginine and proline metabolism; Metabolic pathways	Urea cycle and metabolism of amino groups	Creatine metabolism	7	0	1.138	0.935	0.955	0.998	1.005	1.109	0.918	0.957	0.979	1.101	1.089	0.937	0.971	0.986	1.327	1.07	0.964	0.984	0.994	0.834
TRUE	High	Master Protein	P06686	Sodium/potassium-transporting ATPase subunit alpha-2 OS=Rattus norvegicus GN=Atp1a2 PE=1 SV=1	0	FALSE	280.576	26	29	621	17	1020	112.1	5.55	2084.67	29	cellular homeostasis;metabolic process;regulation of biological process;response to stimulus;transport	cytoplasm;endosome;membrane	catalytic activity;metal ion binding;nucleotide binding;protein binding;transporter activity	Pf00122, Pf00689, Pf00690, Pf00702, Pf08282, Pf12710, Pf13246	24212	ENSRNOG00000007290.6	Atp1a2	13	Bile secretion; Protein digestion and absorption; Endocrine and other factor-regulated calcium reabsorption; cGMP-PKG signaling pathway; Salivary secretion; cAMP signaling pathway; Proximal tubule bicarbonate reclamation; Carbohydrate digestion and absorption; Mineral absorption; Thyroid hormone signaling pathway; Thyroid hormone synthesis; Insulin secretion; Aldosterone-regulated sodium reabsorp…		Ion homeostasis; Ion transport by P-type ATPases	23	13	1.033	1.034	1.025	0.995	0.833	1.044	1.054	1.044	0.974	0.614	1.022	1.007	0.994	0.97	0.627	1.066	1.03	1.001	0.989	0.147
TRUE	High	Master Protein	P05708	Hexokinase-1 OS=Rattus norvegicus GN=Hk1 PE=1 SV=4	0	FALSE	279.251	30	28	519	24	918	102.3	6.71	1814.43	28	cellular homeostasis;metabolic process;regulation of biological process;response to stimulus	cytosol;membrane;mitochondrion	catalytic activity;nucleotide binding;protein binding	Pf00349, Pf03727	25058		Hk1	20	Amino sugar and nucleotide sugar metabolism; Galactose metabolism; Carbon metabolism; Carbohydrate digestion and absorption; Starch and sucrose metabolism; Type II diabetes mellitus; Fructose and mannose metabolism; Metabolic pathways; Insulin signaling pathway; Central carbon metabolism in cancer; Neomycin, kanamycin and gentamicin biosynthesis; Glycolysis / Gluconeogenesis; HIF-1 signaling path…	Glucuronidation; Glycolysis and Gluconeogenesis; Hexoses metabolism in proximal tubules		16	6	1.029	1.007	1.006	1.091	0.889	1.031	0.991	0.995	1.038	1.171	1.048	1.01	1.009	1.014	0.789	1.039	0.966	0.996	0.982	0.566
TRUE	High	Master Protein	P60881	Synaptosomal-associated protein 25 OS=Rattus norvegicus GN=Snap25 PE=1 SV=1	0	FALSE	276.062	66	18	344	18	206	23.3	4.77	1458.46	18	cell differentiation;cell organization and biogenesis;regulation of biological process;response to stimulus;transport	cytoplasm;cytoskeleton;cytosol;endosome;membrane	protein binding;transporter activity	Pf00835, Pf05739	25012		Snap25	3	Synaptic vesicle cycle; Insulin secretion	Insulin Signaling		3	0	1.013	1.034	1.033	0.976	0.971	0.952	1.086	1.029	0.997	1.201	0.947	1.189	1.095	1.02	0.01	0.966	1.144	1.063	0.998	0.96
TRUE	High	Master Protein	G3V6Y6	Phosphorylase OS=Rattus norvegicus GN=Pygb PE=3 SV=1	0	FALSE	274.75	30	20	398	15	843	96.7	6.76	1744.12	20	metabolic process	cytoplasm;membrane	catalytic activity;protein binding	Pf00343	25739		Pygb	3	Insulin signaling pathway; Starch and sucrose metabolism; Metabolic pathways; Insulin resistance; Glucagon signaling pathway	Glycogen Metabolism		6	5	1.027	1.015	0.985	1.006	1.117	1.035	1.01	0.98	1.017	0.651	1.035	1.021	1.041	1.052	0.818	1.05	1.044	1.029	1.056	0.786
TRUE	High	Master Protein	D4A435	Protein Icam5 OS=Rattus norvegicus GN=Icam5 PE=4 SV=1	0	FALSE	263.219	33	26	396	26	917	96.8	6.2	1567.12	26	transport	membrane	protein binding	Pf03921, Pf07679, Pf13895, Pf13927	313785	ENSRNOG00000020694.6	Icam5	8			Integrin cell surface interactions; Immunoregulatory interactions between a Lymphoid and a non-Lymphoid cell	5	0	0.892	0.964	0.978	0.973	0.958	0.89	0.956	0.968	0.905	0.762	0.919	1.013	0.969	0.977	0.822	0.923	1.039	0.992	1.022	1.004
TRUE	High	Master Protein	F1M9N9	Protein Ank2 (Fragment) OS=Rattus norvegicus GN=Ank2 PE=4 SV=2	0	FALSE	262.067	10	32	409	2	3903	427.2	5.26	1486.76	32	regulation of biological process;response to stimulus		protein binding	Pf00023, Pf00531, Pf00791, Pf03326, Pf12796, Pf13606, Pf13637, Pf13857								0	0	1.081	0.851	0.895	0.732	0.54	1.08	0.851	0.893	0.723	0.61	1.042	0.912	0.953	0.699	0.82	1.064	0.852	0.973	0.678	1.051
TRUE	High	Master Protein	Q9QUH6	Ras/Rap GTPase-activating protein SynGAP OS=Rattus norvegicus GN=Syngap1 PE=1 SV=2	0	FALSE	261.862	24	23	308	21	1308	144.6	9.06	1336.19	23	cell organization and biogenesis;regulation of biological process;response to stimulus	cytoplasm;membrane	enzyme regulator activity;protein binding	Pf00168, Pf00169, Pf00616, Pf02463, Pf12004, Pf12037, Pf12718, Pf13863, Pf15346	192117		Syngap1	20				0	2	0.973	0.948	0.971	0.922	0.763	0.996	0.903	0.969	0.87	0.794	0.875	0.867	0.988	0.895	1.264	0.884	0.846	0.964	0.881	0.518
TRUE	High	Master Protein	Q4QQV0	Protein Tubb6 OS=Rattus norvegicus GN=Tubb6 PE=2 SV=1	0	FALSE	255.236	38	14	863	1	447	50	4.89	3123.47	14	cell organization and biogenesis	cytoplasm;cytoskeleton;nucleus	catalytic activity;nucleotide binding;structural molecule activity	Pf00091, Pf03953	307351	ENSRNOG00000018371.4	Tubb6	18	Gap junction; Phagosome		Hedgehog 'on' state; Hedgehog 'off' state; Intraflagellar transport	9	0	1.019	0.953	0.985	0.873	1.358	1.025	0.966	0.99	0.864	1.405	1.112	1.036	0.955	0.845	1.918	1.056	1.012	0.967	0.863	0.98
TRUE	High	Master Protein	P06685	Sodium/potassium-transporting ATPase subunit alpha-1 OS=Rattus norvegicus GN=Atp1a1 PE=1 SV=1	0	FALSE	252.665	24	24	552	13	1023	113	5.45	1903.19	24	cellular homeostasis;metabolic process;regulation of biological process;response to stimulus;transport	endoplasmic reticulum;endosome;Golgi;membrane	catalytic activity;metal ion binding;nucleotide binding;protein binding;transporter activity	Pf00122, Pf00689, Pf00690, Pf00702, Pf08282, Pf12710, Pf13246	24211	ENSRNOG00000030019.4	Atp1a1	2	Pancreatic secretion; Cardiac muscle contraction; Protein digestion and absorption; Adrenergic signaling in cardiomyocytes; cGMP-PKG signaling pathway; Gastric acid secretion; cAMP signaling pathway; Bile secretion; Endocrine and other factor-regulated calcium reabsorption; Salivary secretion; Proximal tubule bicarbonate reclamation; Carbohydrate digestion and absorption; Mineral absorption; Thyr…	Proximal Tubule Transporters; Thick Ascending Limb Transporters	Ion homeostasis; Ion transport by P-type ATPases	25	1	0.978	1.051	0.997	1.003	0.74	0.975	1.075	1.02	1.035	0.853	0.954	1.103	1.055	1.096	0.67	0.95	1.069	1.031	1.106	0.568
TRUE	High	Master Protein	F1LM42	Protein Ank2 OS=Rattus norvegicus GN=Ank2 PE=4 SV=2	0	FALSE	250.844	10	32	357	2	3965	434.1	5.25	1259.41	32	regulation of biological process;response to stimulus		protein binding	Pf00023, Pf00531, Pf00791, Pf03326, Pf12796, Pf13606, Pf13637, Pf13857								0	31	0.961	1.071	1.036	0.961	0.503	0.96	1.042	1.023	0.957	0.742	1.009	1.011	1.051	0.97	1.151	1.028	1.016	1.051	0.995	0.469
TRUE	High	Master Protein	Q5U300	Ubiquitin-like modifier-activating enzyme 1 OS=Rattus norvegicus GN=Uba1 PE=1 SV=1	0	FALSE	240.163	24	19	229	19	1058	117.7	5.57	977.19	19	metabolic process;response to stimulus	cytoplasm;cytosol;membrane;mitochondrion;nucleus	catalytic activity;nucleotide binding;RNA binding	Pf00899, Pf02134, Pf09358, Pf10585	314432	ENSRNOG00000019164.7	Uba1	X	Ubiquitin mediated proteolysis; Parkinson's disease	Proteasome Degradation	Synthesis of active ubiquitin: roles of E1 and E2 enzymes; Antigen processing: Ubiquitination & Proteasome degradation	11	0	0.945	1.128	1.05	1.051	0.861	1.004	1.089	1.061	1.108	1.093	1.053	1.085	1.017	1.055	0.928	1.027	1.101	1.021	1.05	1.524
TRUE	High	Master Protein	P09951	Synapsin-1 OS=Rattus norvegicus GN=Syn1 PE=1 SV=3	0	FALSE	235.823	35	14	430	12	704	73.9	9.8	2009.98	14	cell organization and biogenesis;transport	cytosol;Golgi;membrane	catalytic activity;nucleotide binding;protein binding	Pf02078, Pf02750, Pf08443, Pf10581	24949	ENSRNOG00000010365.7	Syn1	X		CFTR activity in the plasma membrane		1	4	0.943	1.033	1.03	0.942	0.767	0.901	0.998	1.019	0.986	0.843	0.881	0.989	0.972	0.961	0.31	0.939	1.005	1.014	1.002	0.722
TRUE	High	Master Protein	M0R5B4	Uncharacterized protein OS=Rattus norvegicus PE=4 SV=1	0	FALSE	235.541	40	12	794	2	346	38.6	5.55	3072.05	12			catalytic activity	Pf00091, Pf03953								0	0	1.115	0.946	0.982	0.832	0.506	1.105	0.927	0.958	0.822	0.57	1.125	0.91	0.899	0.68	0.01	1.193	0.918	0.946	0.742	0.01
TRUE	High	Master Protein	P09606	Glutamine synthetase OS=Rattus norvegicus GN=Glul PE=1 SV=3	0	FALSE	233.131	46	15	306	15	373	42.2	7.08	1426.06	15	cell communication;cell organization and biogenesis;cell proliferation;metabolic process;regulation of biological process;response to stimulus	cytoplasm;cytosol;endoplasmic reticulum;mitochondrion;nucleus	catalytic activity;metal ion binding;nucleotide binding;protein binding	Pf00120, Pf03951	24957	ENSRNOG00000049560.2	Glul	13	Glyoxylate and dicarboxylate metabolism; Biosynthesis of amino acids; Nitrogen metabolism; GABAergic synapse; Arginine biosynthesis; Metabolic pathways; Glutamatergic synapse; Alanine, aspartate and glutamate metabolism		Amino acid synthesis and interconversion (transamination); Astrocytic Glutamate-Glutamine Uptake And Metabolism	15	0	0.975	1.059	1.123	1.028	1.405	0.923	1.175	1.037	1.019	1.107	1.067	1.064	1.062	1.134	1.095	1.033	1.093	1.042	1.112	0.335
TRUE	High	Master Protein	P09117	Fructose-bisphosphate aldolase C OS=Rattus norvegicus GN=Aldoc PE=1 SV=3	0	FALSE	231.977	52	19	460	17	363	39.3	7.12	2076.27	19	cell death;cell differentiation;cell organization and biogenesis;metabolic process;response to stimulus	cytoplasm;mitochondrion	catalytic activity;protein binding	Pf00274	24191	ENSRNOG00000011452.8	Aldoc	10	Fructose and mannose metabolism; Biosynthesis of amino acids; Glycolysis / Gluconeogenesis; Carbon metabolism; Metabolic pathways; Pentose phosphate pathway	Glycolysis and Gluconeogenesis; Hexoses metabolism in proximal tubules	Glycolysis; Gluconeogenesis; Neutrophil degranulation	16	2	0.975	1.037	1.013	1.042	1.187	0.978	1.029	1.017	1.109	1.321	0.958	1.012	1.002	1.016	1.614	0.942	1.011	0.993	0.994	1.273
TRUE	High	Master Protein	P62815	V-type proton ATPase subunit B, brain isoform OS=Rattus norvegicus GN=Atp6v1b2 PE=1 SV=1	0	FALSE	231.408	37	16	456	16	511	56.5	5.81	1909.7	16	cellular homeostasis;metabolic process;transport	cytoplasm;cytosol;membrane	catalytic activity;nucleotide binding;transporter activity	Pf00006, Pf00306, Pf02874	117596	ENSRNOG00000011891.6	Atp6v1b2	16	Rheumatoid arthritis; Collecting duct acid secretion; Synaptic vesicle cycle; mTOR signaling pathway; Metabolic pathways; Oxidative phosphorylation; Phagosome	Proximal Tubule Transporters	Ion channel transport; Transferrin endocytosis and recycling; Insulin receptor recycling; ROS, RNS production in phagocytes	19	0	0.894	1.018	1.035	1.082	1.137	0.9	1.028	1.034	1.054	1.082	0.924	0.992	1.03	1.06	1.111	0.929	1.001	1.02	1.08	0.93
TRUE	High	Master Protein	Q63198	Contactin-1 OS=Rattus norvegicus GN=Cntn1 PE=1 SV=2	0	FALSE	231.181	27	23	373	22	1021	113.4	6.11	1343.76	23	cell organization and biogenesis;regulation of biological process;response to stimulus	membrane	protein binding	Pf00041, Pf00047, Pf07679, Pf07686, Pf13895, Pf13927	117258	ENSRNOG00000004438.4	Cntn1	7	Cell adhesion molecules (CAMs)	Delta-Notch Signaling Pathway		2	1	0.951	0.99	1.081	0.967	0.825	0.948	0.987	1.046	0.92	1.162	0.948	0.983	1.013	0.915	0.67	0.945	0.963	0.992	0.91	1.159
TRUE	High	Master Protein	P47858	6-phosphofructokinase, muscle type OS=Rattus norvegicus GN=Pfkm PE=2 SV=3	0	FALSE	228.98	26	15	365	1	780	85.5	8	1601.64	15	cell organization and biogenesis;cellular homeostasis;metabolic process;regulation of biological process	cytoplasm;cytosol;membrane	catalytic activity;metal ion binding;nucleotide binding;protein binding	Pf00365	65152		Pfkm	7	Fructose and mannose metabolism; Biosynthesis of amino acids; RNA degradation; Central carbon metabolism in cancer; Carbon metabolism; Glycolysis / Gluconeogenesis; AMPK signaling pathway; Metabolic pathways; Pentose phosphate pathway; Galactose metabolism	Glycolysis and Gluconeogenesis; Hexoses metabolism in proximal tubules; Insulin Signaling		13	0
TRUE	High	Master Protein	P05065	Fructose-bisphosphate aldolase A OS=Rattus norvegicus GN=Aldoa PE=1 SV=2	0	FALSE	228.398	39	14	466	12	364	39.3	8.09	2262.96	14	cell organization and biogenesis;cellular homeostasis;metabolic process;regulation of biological process;response to stimulus	cytoplasm;cytoskeleton;cytosol;membrane;mitochondrion;nucleus	catalytic activity;protein binding;RNA binding	Pf00274	24189	ENSRNOG00000052802.1	Aldoa	1	Biosynthesis of amino acids; HIF-1 signaling pathway; Glycolysis / Gluconeogenesis; Metabolic pathways; Pentose phosphate pathway; Carbon metabolism; Fructose and mannose metabolism	Glycolysis and Gluconeogenesis; Hexoses metabolism in proximal tubules	Platelet degranulation ; Glycolysis; Gluconeogenesis; Neutrophil degranulation	21	0	1.046	1.078	0.965	1.158	0.977	1.043	1.063	0.967	1.146	1.218	1.088	1.04	0.949	1.139	1.393	1.076	1.013	0.936	1.073	1.111
TRUE	High	Master Protein	F1LRL9	Microtubule-associated protein 1B OS=Rattus norvegicus GN=Map1b PE=4 SV=1	0	FALSE	222.594	8	15	232	14	2461	269.5	4.81	1077.32	15	cell growth;cell organization and biogenesis;cellular component movement;regulation of biological process;transport	cytosol;membrane	protein binding			ENSRNOG00000017428.5		2				0	1	0.985	1.07	1.008	1.082	0.597	0.965	1.047	0.985	1.058	1.034	0.999	1.06	0.992	1.021	0.698	0.974	1.118	0.982	1.07	0.543
TRUE	High	Master Protein	F1LQ63	Tenascin-R OS=Rattus norvegicus GN=Tnr PE=4 SV=2	0	FALSE	219.285	18	17	280	2	1266	139.3	4.89	1319.6	17			protein binding	Pf00041, Pf00147, Pf01683, Pf07974								0	16	0.979	0.922	1.047	1.059	0.801	0.959	0.917	1.055	1.044	0.885	0.937	0.885	1.019	1.012	1.025	0.953	0.909	1.016	1.019	1.518
TRUE	High	Master Protein	P47819	Glial fibrillary acidic protein OS=Rattus norvegicus GN=Gfap PE=1 SV=2	0	FALSE	219.148	49	24	375	23	430	49.9	5.44	1394.09	24	cell differentiation;cell organization and biogenesis;regulation of biological process;response to stimulus	cytoplasm;cytoskeleton;membrane	catalytic activity;motor activity;protein binding;structural molecule activity	Pf00038, Pf01576, Pf04732, Pf05761, Pf12128	24387	ENSRNOG00000002919.9	Gfap	10	Jak-STAT signaling pathway	Spinal Cord Injury		2	1	1.087	0.916	0.992	0.922	0.806	1.03	0.94	0.998	0.909	0.87	0.996	0.942	0.907	0.924	0.177	1.012	0.938	0.892	0.921	0.496
TRUE	High	Master Protein	Q63537	Synapsin-2 OS=Rattus norvegicus GN=Syn2 PE=1 SV=1	0	FALSE	216.154	23	11	424	9	586	63.4	8.57	1821.44	11	regulation of biological process;transport	membrane	catalytic activity;nucleotide binding;protein binding	Pf02078, Pf02750, Pf10581	29179		Syn2	4				0	0	0.985	1.011	0.983	1.052	1.006	0.99	1.064	0.984	1.056	0.719	0.868	1.121	0.953	0.994	0.574	0.841	1.11	0.943	1.019	1.181
TRUE	High	Master Protein	P11275	Calcium/calmodulin-dependent protein kinase type II subunit alpha OS=Rattus norvegicus GN=Camk2a PE=1 SV=1	0	FALSE	215.293	42	14	628	7	478	54.1	7.08	2538.46	14	cell differentiation;cell organization and biogenesis;metabolic process;regulation of biological process;response to stimulus;transport	membrane;mitochondrion;nucleus	catalytic activity;metal ion binding;nucleotide binding;protein binding	Pf00069, Pf07714, Pf08332, Pf13474, Pf14534	25400		Camk2a	18	cAMP signaling pathway; Dopaminergic synapse; Adrenergic signaling in cardiomyocytes; Gastric acid secretion; Glucagon signaling pathway; Cholinergic synapse; Axon guidance; Insulin secretion; ErbB signaling pathway; Aldosterone synthesis and secretion; HIF-1 signaling pathway; Tuberculosis; Wnt signaling pathway; Oxytocin signaling pathway; Proteoglycans in cancer; Glioma; Long-term potentiation…	Myometrial Relaxation and Contraction Pathways; Calcium Regulation in the Cardiac Cell; Wnt Signaling Pathway NetPath; EGFR1 Signaling Pathway		30	4	0.83	0.847	0.978	1.055	0.781	0.946	0.962	0.948	0.941	0.6	0.888	0.878	0.938	0.984	0.512	0.854	0.849	0.976	0.989	0.01
TRUE	High	Master Protein	Q920L2	Succinate dehydrogenase [ubiquinone] flavoprotein subunit, mitochondrial OS=Rattus norvegicus GN=Sdha PE=1 SV=1	0	FALSE	215.025	36	14	251	14	656	71.6	7.17	1251.89	14	metabolic process;transport	membrane;mitochondrion	catalytic activity;nucleotide binding	Pf00890, Pf02910	157074	ENSRNOG00000013331.5	Sdha	1	Non-alcoholic fatty liver disease (NAFLD); Alzheimer's disease; Carbon metabolism; Metabolic pathways; Citrate cycle (TCA cycle); Huntington's disease; Parkinson's disease; Oxidative phosphorylation	TCA Cycle; Electron Transport Chain	Citric acid cycle (TCA cycle)	14	0	0.904	1.241	1.008	1.055	0.699	0.928	1.14	1.004	1.141	0.557	0.937	1.046	0.966	1.117	0.578	1.013	1.076	1.031	1.115	0.324
TRUE	High	Master Protein	P47860	6-phosphofructokinase type C OS=Rattus norvegicus GN=Pfkp PE=1 SV=2	0	FALSE	214.233	26	14	356	10	788	85.7	7.28	1502.65	14	cell organization and biogenesis;metabolic process	cytoplasm;cytosol;membrane;nucleus	catalytic activity;metal ion binding;nucleotide binding;protein binding	Pf00365	60416		Pfkp	17	Glycolysis / Gluconeogenesis; Galactose metabolism; Central carbon metabolism in cancer; Pentose phosphate pathway; Biosynthesis of amino acids; Metabolic pathways; RNA degradation; AMPK signaling pathway; Fructose and mannose metabolism; Thyroid hormone signaling pathway; Carbon metabolism	Glycolysis and Gluconeogenesis; Hexoses metabolism in proximal tubules		13	0	0.988	0.969	0.99	1.022	0.976	1.008	0.996	0.998	1.043	1.156	0.942	1.001	0.998	1.119	1.039	0.953	1.003	0.988	1.08	0.787
TRUE	High	Master Protein	P10860	Glutamate dehydrogenase 1, mitochondrial OS=Rattus norvegicus GN=Glud1 PE=1 SV=2	0	FALSE	213.49	28	14	357	14	558	61.4	8	1321.96	14	metabolic process;regulation of biological process;response to stimulus	cytoplasm;membrane;mitochondrion;organelle lumen	catalytic activity;nucleotide binding;protein binding	Pf00208, Pf02812	24399	ENSRNOG00000057367.1	Glud1	16	Proximal tubule bicarbonate reclamation; D-Glutamine and D-glutamate metabolism; Metabolic pathways; Nitrogen metabolism; Arginine biosynthesis; Alanine, aspartate and glutamate metabolism; Carbon metabolism	Urea cycle and metabolism of amino groups	Amino acid synthesis and interconversion (transamination); Transcriptional activation of mitochondrial biogenesis	14	0	1.077	1.053	1.02	1	1.108	1.07	1.027	1.032	1.101	1.005	1.109	1.045	1.002	1.022	0.465	1.087	1.029	1.043	1.04	0.867
TRUE	High	Master Protein	P63018	Heat shock cognate 71 kDa protein OS=Rattus norvegicus GN=Hspa8 PE=1 SV=1	0	FALSE	210.208	28	11	439	5	646	70.8	5.52	1953.06	11	cell organization and biogenesis;cellular component movement;metabolic process;regulation of biological process;response to stimulus;transport	cell surface;cytoplasm;cytosol;endosome;membrane;nucleus;spliceosomal complex;vacuole	catalytic activity;nucleotide binding;protein binding;RNA binding	Pf00012, Pf02463, Pf06723	24468		Hspa8	8	Protein processing in endoplasmic reticulum; Legionellosis; Endocytosis; Influenza A; Measles; Toxoplasmosis; MAPK signaling pathway; Estrogen signaling pathway; Epstein-Barr virus infection; Longevity regulating pathway - multiple species; Spliceosome; Antigen processing and presentation			12	6	0.97	0.999	0.992	0.99	1.028	0.968	0.999	0.99	0.989	0.774	1.004	1.024	0.994	0.982	1.07	1.019	0.995	0.982	0.993	0.979
TRUE	High	Master Protein	P18484	AP-2 complex subunit alpha-2 OS=Rattus norvegicus GN=Ap2a2 PE=1 SV=3	0	FALSE	209.333	26	21	327	14	938	104	6.93	1129.72	21	transport	Golgi;membrane	protein binding;transporter activity	Pf01602, Pf02296, Pf02883, Pf13646	81637		Ap2a2	1				0	0	1.053	0.994	0.983	0.992	1.387	1.166	1.064	0.962	0.978	1.589	1.037	0.996	0.996	0.94	1.289	1.017	1.071	1.019	0.965	1.006
TRUE	High	Master Protein	Q9JKB7	Guanine deaminase OS=Rattus norvegicus GN=Gda PE=2 SV=1	0	FALSE	204.87	30	11	353	11	454	50.9	5.72	1584.97	11	metabolic process;regulation of biological process		catalytic activity;metal ion binding	Pf01979, Pf07969, Pf13147	83585	ENSRNOG00000018282.6	Gda	1	Metabolic pathways; Purine metabolism		Purine catabolism	6	0	1.051	1.114	1.049	1.155	1.452	1.028	1.1	1.031	1.23	1.06	0.988	1.046	1.026	1.161	1.094	0.968	1.122	1.061	1.175	1.227
TRUE	High	Master Protein	P30835	6-phosphofructokinase, liver type OS=Rattus norvegicus GN=Pfkl PE=2 SV=3	0	FALSE	203.7	25	16	326	11	780	85.3	7.4	1316.81	16	cell organization and biogenesis;metabolic process;regulation of biological process;response to stimulus	cytoplasm;cytosol;membrane	catalytic activity;metal ion binding;nucleotide binding;protein binding	Pf00365	25741	ENSRNOG00000001214.5	Pfkl	20	Galactose metabolism; Fructose and mannose metabolism; Biosynthesis of amino acids; Carbon metabolism; RNA degradation; Central carbon metabolism in cancer; HIF-1 signaling pathway; Glycolysis / Gluconeogenesis; AMPK signaling pathway; Metabolic pathways; Pentose phosphate pathway; Glucagon signaling pathway	Glycolysis and Gluconeogenesis; Hexoses metabolism in proximal tubules; Insulin Signaling	Glycolysis; Neutrophil degranulation	22	3	0.996	0.983	0.998	0.957	1.126	0.979	0.979	0.998	0.955	1.261	0.977	1.034	1.07	1.01	0.687	0.974	1.033	1.065	1.019	0.531
TRUE	High	Master Protein	R9PY05	Neurofascin OS=Rattus norvegicus GN=Nfasc PE=4 SV=1	0	FALSE	199.288	20	21	253	2	1240	138	6.23	1030.72	21			protein binding	Pf00041, Pf00047, Pf07679, Pf07686, Pf13882, Pf13895, Pf13927								0	21	0.983	0.983	1.03	0.976	1.373	0.986	0.974	1.005	0.962	0.902	1.008	0.968	1.056	0.974	0.625	0.975	0.955	1.07	1.029	1.431
TRUE	High	Master Protein	G3V984	Protein bassoon OS=Rattus norvegicus GN=Bsn PE=4 SV=1	0	FALSE	192.668	12	30	160	30	3933	417.8	7.59	670.79	30	cell organization and biogenesis;cellular component movement;transport	cell surface;cytoskeleton	metal ion binding;protein binding	Pf05715	29138	ENSRNOG00000030714.5	Bsn	8				0	0	1.039	1.113	0.984	0.938	1.302	1.034	0.984	1.04	1.032	1.159	0.97	0.961	0.977	0.991	0.858	0.96	0.975	1.041	1.088	0.834
TRUE	High	Master Protein	P82995	Heat shock protein HSP 90-alpha OS=Rattus norvegicus GN=Hsp90aa1 PE=1 SV=3	0	FALSE	189.862	22	15	416	9	733	84.8	5.01	1575.19	15	cell death;cell organization and biogenesis;cellular component movement;metabolic process;regulation of biological process;response to stimulus;transport	cell surface;cytoplasm;cytosol;membrane;nucleus	catalytic activity;enzyme regulator activity;nucleotide binding;protein binding;RNA binding	Pf00183, Pf02518, Pf13589	299331; 103692716	ENSRNOG00000007219.7; ENSRNOG00000059714.1	Hsp90aa1; LOC103692716	6	Protein processing in endoplasmic reticulum; Prostate cancer; NOD-like receptor signaling pathway; Progesterone-mediated oocyte maturation; Estrogen signaling pathway; Antigen processing and presentation; Pathways in cancer; PI3K-Akt signaling pathway	EBV LMP1 signaling; IL-6 Signaling Pathway; TNF-alpha NF-kB Signaling Pathway; IL-2 Signaling Pathway	VEGFR2 mediated vascular permeability; Tetrahydrobiopterin (BH4) synthesis, recycling, salvage and regulation; Regulation of PLK1 Activity at G2/M Transition; HSP90 chaperone cycle for steroid hormone receptors (SHR); Regulation of actin dynamics for phagocytic cup formation; AURKA Activation by TPX2; Neutrophil degranulation; Recruitment of mitotic centrosome proteins and complexes; The role of …	59	6	0.969	1.084	1.054	1.008	0.735	0.983	1.056	1.045	0.993	1.04	1.013	1.071	1.03	1.064	0.798	1.01	1.067	1.051	1.042	1.152
TRUE	High	Master Protein	F1M3W5	Protein Dmxl2 (Fragment) OS=Rattus norvegicus GN=Dmxl2 PE=4 SV=2	0	FALSE	185.562	15	24	196	24	2244	250.4	6.29	808.84	24			protein binding	Pf00400, Pf12234								0	0	1.034	0.956	0.973	0.851	1.136	1.001	1.034	0.97	0.974	0.794	0.991	0.964	0.966	0.882	0.865	0.991	0.985	0.979	0.908	1.353
TRUE	High	Master Protein	F1LX07	Protein Slc25a12 (Fragment) OS=Rattus norvegicus GN=Slc25a12 PE=3 SV=2	0	FALSE	184.241	31	15	214	15	675	74.2	8.75	905.2	15			metal ion binding	Pf00153, Pf13499								0	0	1.008	0.915	1.017	1.072	1.489	1.038	0.922	0.988	1.074	1.009	1.063	0.924	1.034	1.098	1.281	1.003	0.882	0.993	1.088	1.067
TRUE	High	Master Protein	P34058	Heat shock protein HSP 90-beta OS=Rattus norvegicus GN=Hsp90ab1 PE=1 SV=4	0	FALSE	182.895	22	14	427	3	724	83.2	5.03	1689.44	14	cell organization and biogenesis;metabolic process;regulation of biological process;response to stimulus	cell surface;cytoplasm;cytosol;extracellular;membrane;mitochondrion;nucleus	enzyme regulator activity;nucleotide binding;protein binding;RNA binding	Pf00183, Pf02518, Pf13589	301252	ENSRNOG00000019834.6	Hsp90ab1	9	Progesterone-mediated oocyte maturation; Prostate cancer; Protein processing in endoplasmic reticulum; Pathways in cancer; PI3K-Akt signaling pathway; Estrogen signaling pathway; Antigen processing and presentation; NOD-like receptor signaling pathway	TNF-alpha NF-kB Signaling Pathway	HSP90 chaperone cycle for steroid hormone receptors (SHR); Aryl hydrocarbon receptor signalling; Regulation of actin dynamics for phagocytic cup formation; Neutrophil degranulation; The role of GTSE1 in G2/M progression after G2 checkpoint; The NLRP3 inflammasome; Attenuation phase; Sema3A PAK dependent Axon repulsion; HSF1 activation	37	7	0.951	1.107	1.032	1.071	1.004	0.949	1.077	1.013	0.932	0.501	0.967	1.069	1.063	1.247	1.557	1.024	1.134	1.057	1.225	0.731
TRUE	High	Master Protein	P25286	V-type proton ATPase 116 kDa subunit a isoform 1 OS=Rattus norvegicus GN=Atp6v0a1 PE=2 SV=1	0	FALSE	181.875	19	17	365	17	838	96.3	6.47	1317.77	17	cell organization and biogenesis;cellular homeostasis;metabolic process;regulation of biological process;transport	cytoplasm;cytosol;Golgi;membrane	catalytic activity;protein binding;transporter activity	Pf01496	29757		Atp6v0a1	10	Tuberculosis; Lysosome; Oxidative phosphorylation; Phagosome; Rheumatoid arthritis; Metabolic pathways; Synaptic vesicle cycle; Collecting duct acid secretion	Proximal Tubule Transporters		9	0	0.954	1.316	0.968	1.241	0.975	0.935	1.342	0.957	1.365	0.921	0.946	1.005	1.021	1.081	0.742	1.008	1.003	1.01	0.992	0.654
TRUE	High	Master Protein	P97846	Contactin-associated protein 1 OS=Rattus norvegicus GN=Cntnap1 PE=1 SV=1	0	FALSE	178.96	19	22	220	22	1381	155.8	6.99	847.75	22	cell organization and biogenesis	membrane	protein binding	Pf00054, Pf00147, Pf00754, Pf02210	84008	ENSRNOG00000020277.6	Cntnap1	10	Cell adhesion molecules (CAMs)			1	0	0.964	0.919	0.972	0.95	1.168	0.949	0.951	0.978	0.942	0.863	0.986	0.878	0.952	0.95	0.548	0.891	0.86	0.921	0.902	0.588
TRUE	High	Master Protein	Q05546	Tenascin-R OS=Rattus norvegicus GN=Tnr PE=1 SV=1	0	FALSE	178.606	15	16	242	1	1356	149.3	4.92	1043.72	16	cell organization and biogenesis;cellular component movement;regulation of biological process;response to stimulus	cell surface;extracellular;membrane	protein binding	Pf00041, Pf00147, Pf01683, Pf07974	25567		Tnr	13	ECM-receptor interaction; PI3K-Akt signaling pathway; MicroRNAs in cancer; Focal adhesion	Focal Adhesion		5	0						1.003	0.939	0.956	0.938	1.351
TRUE	High	Master Protein	P11980	Pyruvate kinase PKM OS=Rattus norvegicus GN=Pkm PE=1 SV=3	0	FALSE	177.831	30	15	337	6	531	57.8	7.06	1229.46	15	cell death;cell organization and biogenesis;metabolic process;response to stimulus	cytoplasm;cytosol;mitochondrion;nucleus	catalytic activity;metal ion binding;nucleotide binding;protein binding;RNA binding	Pf00224, Pf02887	25630	ENSRNOG00000011329.7	Pkm	8	Purine metabolism; Type II diabetes mellitus; Biosynthesis of amino acids; Pyruvate metabolism; Glycolysis / Gluconeogenesis; Carbon metabolism; Viral carcinogenesis; Glucagon signaling pathway; Metabolic pathways; Central carbon metabolism in cancer	Glycolysis and Gluconeogenesis; Hexoses metabolism in proximal tubules	Glycolysis; Neutrophil degranulation	19	11	1.091	1.012	0.982	0.973	0.562	1.036	1.016	0.964	0.934	1.085	1.063	1.013	1.001	0.894	1.07	1.066	1.01	0.988	0.884	0.334
TRUE	High	Master Protein	Q64715	Microtubule-associated protein OS=Rattus norvegicus GN=Map2 PE=2 SV=1	0	FALSE	174.414	13	19	291	19	1825	198.4	4.84	1227.31	19	cell organization and biogenesis;regulation of biological process;response to stimulus	cytoplasm;cytoskeleton;cytosol;endoplasmic reticulum	protein binding	Pf00418, Pf08377	25595		Map2	9		MAPK Cascade		1	0	0.917	0.907	1.054	0.999	1.034	0.934	0.908	1.04	0.974	0.643	0.962	0.881	0.968	0.91	0.554	0.968	0.898	1.017	0.958	0.447
TRUE	High	Master Protein	Q5BJ93	Enolase 1, (Alpha) OS=Rattus norvegicus GN=Eno1 PE=2 SV=2	0	FALSE	174.268	27	11	524	3	434	47.1	6.57	2420.26	11	cell organization and biogenesis;metabolic process;regulation of biological process;response to stimulus	cell surface;cytoplasm;cytosol;membrane;nucleus	catalytic activity;DNA binding;metal ion binding;protein binding;RNA binding	Pf00113, Pf03952, Pf13378	24333	ENSRNOG00000017895.7	Eno1	5	HIF-1 signaling pathway; Biosynthesis of amino acids; Carbon metabolism; Metabolic pathways; RNA degradation; Glycolysis / Gluconeogenesis	Glycolysis and Gluconeogenesis; Hexoses metabolism in proximal tubules	Glycolysis; Gluconeogenesis	13	9	0.965	1	1.066	1.177	1.576	0.943	1.011	1.059	1.17	1.276	0.925	1.025	1.024	1.152	1.4	0.963	0.992	1.051	1.101	1.508
TRUE	High	Master Protein	P07323	Gamma-enolase OS=Rattus norvegicus GN=Eno2 PE=1 SV=2	0	FALSE	173.273	34	14	563	11	434	47.1	5.16	2383.18	14	cell organization and biogenesis;metabolic process;regulation of biological process;response to stimulus	cell surface;cytoplasm;membrane	catalytic activity;metal ion binding;protein binding	Pf00113, Pf03952, Pf13378	24334; 100911625	ENSRNOG00000048365.2; ENSRNOG00000013141.6	Eno2; LOC100911625	4; 9	Glycolysis / Gluconeogenesis; HIF-1 signaling pathway; Metabolic pathways; Carbon metabolism; RNA degradation; Biosynthesis of amino acids	Glycolysis and Gluconeogenesis; Hexoses metabolism in proximal tubules	Glycolysis; Gluconeogenesis	13	3	1.039	0.997	1.048	1.057	1.231	1.028	1.015	1.052	1.052	1.393	1.047	1.055	1.078	1.087	1.395	1.067	1.059	1.086	1.089	1.263
TRUE	High	Master Protein	G3V8V3	Phosphorylase OS=Rattus norvegicus GN=Pygm PE=3 SV=1	0	FALSE	172.324	25	17	237	10	842	97.2	7.11	938.76	17	cellular homeostasis;metabolic process;response to stimulus	cytoplasm;endoplasmic reticulum	catalytic activity;nucleotide binding;protein binding	Pf00343	24701	ENSRNOG00000021090.5	Pygm	1	Metabolic pathways; Glucagon signaling pathway; Insulin signaling pathway; Insulin resistance; Starch and sucrose metabolism	Glycogen Metabolism	Glycogen breakdown (glycogenolysis)	10	2	1.089	1.024	0.996	0.917	0.01	1.06	1.012	0.974	1.015	1.563	1.043	1.029	0.962	0.959	1.042	1.001	1.041	1.046	1.056	1.223
TRUE	High	Master Protein	G3V8Q2	Alpha-internexin OS=Rattus norvegicus GN=Ina PE=3 SV=1	0	FALSE	171.723	45	23	279	20	506	56.2	5.2	1128.04	23	cell differentiation;cell organization and biogenesis	cytoskeleton;membrane	protein binding;structural molecule activity	Pf00038, Pf04732	24503	ENSRNOG00000020248.6	Ina	1				0	3	1	0.832	0.88	0.776	0.704	1.052	0.829	0.866	0.805	0.946	0.88	0.811	0.832	0.737	0.876	0.809	0.869	0.8	0.669	0.602
TRUE	High	Master Protein	F1LNI8	Calcium/calmodulin-dependent protein kinase type II subunit beta OS=Rattus norvegicus GN=Camk2b PE=2 SV=1	0	FALSE	170.653	36	14	318	3	589	65	7.37	1100.38	14	cell organization and biogenesis;metabolic process;regulation of biological process;response to stimulus;transport	cytoplasm;cytosol;membrane	catalytic activity;nucleotide binding;protein binding	Pf00069, Pf07714, Pf08332, Pf12680, Pf13474, Pf14534	24245	ENSRNOG00000052080.1	Camk2b	14		Hypothetical Network for Drug Addiction; Myometrial Relaxation and Contraction Pathways; PKA-HCG-Glycogen Syntase; Calcium Regulation in the Cardiac Cell; Wnt Signaling Pathway NetPath	RAF/MAP kinase cascade; HSF1-dependent transactivation; Interleukin-20 family signaling; CREB phosphorylation through the activation of CaMKII; Ras activation uopn Ca2+ infux through NMDA receptor; Trafficking of AMPA receptors; Interferon gamma signaling; Unblocking of NMDA receptor, glutamate binding and activation	30	14	0.99	0.934	0.94	0.924	0.948	0.995	0.942	0.866	0.895	1.241	0.922	0.939	0.961	0.912	0.358	0.897	0.925	0.954	0.889	0.01
TRUE	High	Master Protein	D3ZNW5	Neurofascin OS=Rattus norvegicus GN=Nfasc PE=4 SV=2	0	FALSE	169.579	19	20	234	1	1174	132.1	6.7	943.62	20			protein binding	Pf00041, Pf00047, Pf07679, Pf07686, Pf13882, Pf13895, Pf13927								0	0
TRUE	High	Master Protein	Q63633	Solute carrier family 12 member 5 OS=Rattus norvegicus GN=Slc12a5 PE=1 SV=2	0	FALSE	168.403	14	15	269	13	1139	126.2	6.81	1110.54	15	cell communication;cellular homeostasis;response to stimulus;transport	membrane	protein binding;transporter activity	Pf00324, Pf10146, Pf13520	171373		Slc12a5	3	GABAergic synapse			1	3	1.048	1.045	0.974	0.998	1.488	1.07	1.019	0.988	1.015	0.598	1.043	0.998	0.987	0.992	0.769	1.072	1.003	1.015	1.035	1.09
TRUE	High	Master Protein	O35095	Neurochondrin OS=Rattus norvegicus GN=Ncdn PE=1 SV=2	0	FALSE	167.234	29	18	242	18	729	78.9	5.62	921.24	18	cell organization and biogenesis;regulation of biological process	cytoplasm;cytosol;membrane;nucleus	protein binding	Pf05536	89791	ENSRNOG00000011751.4	Ncdn	5				0	0	0.965	0.93	0.97	0.954	1.001	0.964	0.951	0.985	0.954	1.154	0.987	0.973	0.986	0.96	0.533	0.989	0.972	0.979	0.962	0.282
TRUE	High	Master Protein	Q9QXY2	SRC kinase signaling inhibitor 1 OS=Rattus norvegicus GN=Srcin1 PE=1 SV=1	0	FALSE	166.541	25	23	132	23	1197	129.7	9.36	462.31	23	cell organization and biogenesis;regulation of biological process;transport	cytoplasm;cytoskeleton;membrane	protein binding		56029	ENSRNOG00000011475.6	Srcin1	10				0	0	0.884	0.904	0.932	0.694	0.811	0.865	0.961	1.004	0.711	0.372	0.915	0.977	0.966	0.984	1.345	0.92	0.979	1.002	1.019	1.54
TRUE	High	Master Protein	P19527	Neurofilament light polypeptide OS=Rattus norvegicus GN=Nefl PE=1 SV=3	0	FALSE	166.083	32	21	271	19	542	61.3	4.65	1110.9	21	cell organization and biogenesis;cellular component movement;regulation of biological process;response to stimulus;transport	cytoplasm	catalytic activity;motor activity;protein binding;structural molecule activity	Pf00038, Pf01576	83613	ENSRNOG00000013658.3	Nefl	15	Amyotrophic lateral sclerosis (ALS)		RAF/MAP kinase cascade; Interleukin-20 family signaling; CREB phosphorylation through the activation of CaMKII; Ras activation uopn Ca2+ infux through NMDA receptor; Unblocking of NMDA receptor, glutamate binding and activation	18	0	0.892	0.794	0.833	0.808	0.691	0.878	0.771	0.821	0.808	0.547	0.89	0.746	0.786	0.771	0.224	0.907	0.761	0.791	0.771	0.438
TRUE	High	Master Protein	D3ZUY8	Adaptor protein complex AP-2, alpha 1 subunit (Predicted) OS=Rattus norvegicus GN=Ap2a1 PE=4 SV=1	0	FALSE	165.974	26	23	270	16	977	107.6	7.06	914.33	23	regulation of biological process;transport	cytoplasm;membrane	protein binding;transporter activity	Pf01602, Pf02296, Pf02883, Pf13646	308578	ENSRNOG00000026243.5	Ap2a1	1	Endocrine and other factor-regulated calcium reabsorption; Huntington's disease; Synaptic vesicle cycle; Endocytosis	EGFR1 Signaling Pathway	Trafficking of GluR2-containing AMPA receptors; Recycling pathway of L1; Retrograde neurotrophin signalling; WNT5A-dependent internalization of FZD4; MHC class II antigen presentation; LDL clearance; Cargo recognition for clathrin-mediated endocytosis; WNT5A-dependent internalization of FZD2, FZD5 and ROR2; VLDLR internalisation and degradation	37	7	1.054	1.003	1.085	1.076	1.005	1.022	0.974	1.058	1.108	0.998	1.018	0.969	1.029	1.069	1.15	1.073	1.016	1.038	1.085	0.52
TRUE	High	Master Protein	G3V8G4	Brevican, isoform CRA_a OS=Rattus norvegicus GN=Bcan PE=4 SV=1	0	FALSE	163.815	25	21	237	20	883	95.9	4.94	907.96	21	regulation of biological process		metal ion binding;protein binding;structural molecule activity	Pf00008, Pf00059, Pf00084, Pf00193	25393	ENSRNOG00000018798.7	Bcan	2		Spinal Cord Injury	Dermatan sulfate biosynthesis; A tetrasaccharide linker sequence is required for GAG synthesis; Chondroitin sulfate biosynthesis; Degradation of the extracellular matrix; CS/DS degradation; ECM proteoglycans	13	1	0.996	1.001	0.964	0.94	0.01	0.988	1.016	0.999	0.983	0.455	0.921	0.943	0.991	0.961	0.896	0.983	1.017	0.971	0.975	1.138
TRUE	High	Master Protein	Q62951	Dihydropyrimidinase-related protein 4 (Fragment) OS=Rattus norvegicus GN=Dpysl4 PE=1 SV=1	0	FALSE	153.913	33	13	228	12	564	61	6.77	983.95	13	cell death;cellular component movement	cytoplasm	catalytic activity;protein binding	Pf01979, Pf13147, Pf13594	25417		Dpysl4	1				0	1	1.007	1.046	1.046	1.006	1.707	0.99	1.022	1.034	1.001	1.067	0.967	0.995	1.003	0.989	1.457	0.961	0.998	0.985	0.932	0.949
TRUE	High	Master Protein	P32551	Cytochrome b-c1 complex subunit 2, mitochondrial OS=Rattus norvegicus GN=Uqcrc2 PE=1 SV=2	0	FALSE	153.77	29	12	279	12	452	48.4	9.14	1128.35	12	metabolic process;transport	membrane;mitochondrion	catalytic activity;metal ion binding;protein binding	Pf00675, Pf05193	293448	ENSRNOG00000036742.3	Uqcrc2	1	Huntington's disease; Metabolic pathways; Non-alcoholic fatty liver disease (NAFLD); Alzheimer's disease; Cardiac muscle contraction; Parkinson's disease; Oxidative phosphorylation	Electron Transport Chain	Respiratory electron transport	12	0	1.051	0.942	1.021	1.072	0.919	1.063	0.935	1.007	1.076	1.109	1.085	0.932	1.008	1.068	0.331	1.105	0.946	0.986	1.07	0.714
TRUE	High	Master Protein	P50398	Rab GDP dissociation inhibitor alpha OS=Rattus norvegicus GN=Gdi1 PE=1 SV=1	0	FALSE	153.407	32	14	235	9	447	50.5	5.14	890.84	14	metabolic process;regulation of biological process;response to stimulus;transport	cytoplasm;Golgi	catalytic activity;enzyme regulator activity;protein binding	Pf00996	25183	ENSRNOG00000056870.1	Gdi1	X			Rho GTPase cycle; RAB GEFs exchange GTP for GDP on RABs	7	5	0.955	0.959	0.966	1.03	1.355	0.985	1	0.958	1.012	1.018	0.99	1.002	1.016	1.004	0.88	0.955	0.96	0.985	0.961	1.233
TRUE	High	Master Protein	P13221	Aspartate aminotransferase, cytoplasmic OS=Rattus norvegicus GN=Got1 PE=1 SV=3	0	FALSE	151.612	33	13	320	13	413	46.4	7.21	1214.63	13	metabolic process;regulation of biological process;response to stimulus	cytoplasm;cytosol;mitochondrion;nucleus;vacuole	catalytic activity	Pf00155	24401	ENSRNOG00000016356.7	Got1	1	Tyrosine metabolism; Arginine and proline metabolism; Phenylalanine, tyrosine and tryptophan biosynthesis; 2-Oxocarboxylic acid metabolism; Biosynthesis of amino acids; Metabolic pathways; Cysteine and methionine metabolism; Arginine biosynthesis; Alanine, aspartate and glutamate metabolism; Phenylalanine metabolism; Carbon metabolism	Alanine and aspartate metabolism; Glycolysis and Gluconeogenesis; Hexoses metabolism in proximal tubules	Amino acid synthesis and interconversion (transamination); Gluconeogenesis	20	0	0.99	1.056	0.991	0.96	0.658	0.996	1.069	0.961	0.958	0.663	0.987	1.097	1.014	0.939	0.01	0.976	1.08	1.018	0.996	0.737
TRUE	High	Master Protein	Q9QUL6	Vesicle-fusing ATPase OS=Rattus norvegicus GN=Nsf PE=1 SV=1	0	FALSE	151.529	27	19	339	19	744	82.6	6.99	1211.32	19	cell organization and biogenesis;metabolic process;regulation of biological process;response to stimulus;transport	cytoplasm;cytosol;membrane	catalytic activity;metal ion binding;nucleotide binding;protein binding;RNA binding	Pf00004, Pf00910, Pf01078, Pf02359, Pf02933, Pf05272, Pf05496, Pf06068, Pf07724, Pf07728, Pf13173, Pf13191, Pf13207, Pf13401	60355		Nsf	10	Vasopressin-regulated water reabsorption; Synaptic vesicle cycle; GABAergic synapse			3	0	0.935	0.93	0.946	0.912	0.75	0.96	0.969	0.938	0.94	0.623	0.946	0.938	0.974	0.884	1.106	0.968	0.966	0.975	0.908	1.199
TRUE	High	Master Protein	P04636	Malate dehydrogenase, mitochondrial OS=Rattus norvegicus GN=Mdh2 PE=1 SV=2	0	FALSE	151.327	26	7	446	7	338	35.7	8.68	2034.82	7	metabolic process	membrane;mitochondrion;nucleus;organelle lumen	catalytic activity;nucleotide binding;protein binding;RNA binding	Pf00056, Pf01073, Pf01118, Pf02866, Pf13460	81829	ENSRNOG00000001440.4	Mdh2	12	Cysteine and methionine metabolism; Carbon metabolism; Citrate cycle (TCA cycle); Pyruvate metabolism; Metabolic pathways; Glyoxylate and dicarboxylate metabolism	Glycolysis and Gluconeogenesis; TCA Cycle; Hexoses metabolism in proximal tubules	Citric acid cycle (TCA cycle); Gluconeogenesis	16	0	0.881	0.946	0.927	1.042	1.119	0.868	0.925	0.963	1.038	0.713	0.916	0.964	0.957	0.973	0.484	0.91	0.951	0.939	0.969	0.447
TRUE	High	Master Protein	Q3KR86	Mitochondrial inner membrane protein (Fragment) OS=Rattus norvegicus GN=Immt PE=1 SV=1	0	FALSE	150.668	24	10	135	10	609	67.1	5.8	639.43	10	cell organization and biogenesis;cellular homeostasis;response to stimulus	membrane;mitochondrion	RNA binding	Pf09731	312444		Immt	4				0	0	1.049	1.132	1.009	1.05	1.649	1.121	1.069	0.999	1.059	1.824	0.996	1.014	0.998	1.012	0.882	1.044	0.985	1.02	0.992	0.989
TRUE	High	Master Protein	F8WFW5	cGMP-dependent 3',5'-cyclic phosphodiesterase OS=Rattus norvegicus GN=Pde2a PE=4 SV=1	0	FALSE	150.636	18	12	114	12	935	105.2	5.48	609.06	12	cell differentiation;metabolic process;regulation of biological process;response to stimulus	cytoplasm;cytosol;endoplasmic reticulum;Golgi;membrane;mitochondrion;nucleus;organelle lumen	catalytic activity;metal ion binding;nucleotide binding;protein binding	Pf00233, Pf01590, Pf13185, Pf13492	81743	ENSRNOG00000019560.7	Pde2a	1	Olfactory transduction; cGMP-PKG signaling pathway; Purine metabolism; Aldosterone synthesis and secretion; Morphine addiction	Angiotensin signaling in thick ascending limbs	G alpha (s) signalling events; cGMP effects	14	0	1.08	1.086	0.952	0.979	0.712	1.002	1.007	0.985	1.015	1.408	0.912	0.916	0.914	1.007	0.885	0.966	0.975	0.979	1.049	0.01
TRUE	High	Master Protein	Q62910	Synaptojanin-1 OS=Rattus norvegicus GN=Synj1 PE=1 SV=3	0	FALSE	150.189	17	23	184	23	1574	172.8	6.87	653.47	23	cell organization and biogenesis;metabolic process;regulation of biological process;response to stimulus;transport	cytoplasm;cytosol;membrane	catalytic activity;protein binding;RNA binding	Pf02383, Pf03276, Pf03372, Pf05518, Pf08952, Pf15449	85238	ENSRNOG00000002051.8	Synj1	11	Inositol phosphate metabolism; Metabolic pathways; Phosphatidylinositol signaling system		Synthesis of IP3 and IP4 in the cytosol; Synthesis of IP2, IP, and Ins in the cytosol; Clathrin-mediated endocytosis; Synthesis of PIPs at the plasma membrane	14	0	0.977	0.973	0.989	0.951	1.042	1.011	1.015	0.969	0.971	1.548	1.122	1.045	0.958	0.788	0.818	1.155	1.009	0.919	0.755	1.056
TRUE	High	Master Protein	Q45QL6	Guanine nucleotide binding protein beta 2 (Fragment) OS=Rattus norvegicus GN=Gnb2 PE=2 SV=1	0	FALSE	148.247	39	8	213	3	319	35	6.34	1007.41	8	regulation of biological process;response to stimulus	membrane	protein binding;signal transducer activity	Pf00400	81667		Gnb2	12		Myometrial Relaxation and Contraction Pathways; Calcium Regulation in the Cardiac Cell; G Protein Signaling Pathways		3	3	1.094	1.004	1.029	1.026	1.224	1.037	0.99	1.05	1.074	1.407	1.048	0.972	1.082	1.037	0.01	1.083	1.006	1.12	1.057	0.379
TRUE	High	Master Protein	P31016	Disks large homolog 4 OS=Rattus norvegicus GN=Dlg4 PE=1 SV=1	0	FALSE	147.959	27	17	181	16	724	80.4	5.88	768.59	17	cell organization and biogenesis;cellular homeostasis;metabolic process;regulation of biological process;response to stimulus	cytoplasm;cytoskeleton;cytosol;endoplasmic reticulum;membrane	catalytic activity;protein binding	Pf00018, Pf00595, Pf00625, Pf07653, Pf10600, Pf10608, Pf13180	29495	ENSRNOG00000018526.7	Dlg4	10	Glutamatergic synapse; Huntington's disease; Cocaine addiction; Hippo signaling pathway	Wnt Signaling Pathway NetPath	Ras activation uopn Ca2+ infux through NMDA receptor; Synaptic adhesion-like molecules; Unblocking of NMDA receptor, glutamate binding and activation; RAF/MAP kinase cascade; Neurexins and neuroligins; RHO GTPases activate CIT; LGI-ADAM interactions; Interleukin-20 family signaling; CREB phosphorylation through the activation of CaMKII; Trafficking of AMPA receptors; Activation of Ca-permeable Ka…	35	1	1.074	0.989	0.964	0.91	1.197	0.789	1.021	0.975	0.912	0.528	0.84	0.963	0.981	1.007	0.708	0.861	0.954	0.946	0.927	1.095
TRUE	High	Master Protein	D4A8H8	Cytoplasmic FMR1 interacting protein 1 (Predicted) OS=Rattus norvegicus GN=Cyfip1 PE=4 SV=1	0	FALSE	147.062	16	18	276	13	1253	145.2	6.9	888.11	18	cell growth;cell organization and biogenesis;regulation of biological process;response to stimulus	cytoplasm	protein binding;RNA binding	Pf05994, Pf07159	308666	ENSRNOG00000011945.7	Cyfip1	1	RNA transport; Regulation of actin cytoskeleton		RHO GTPases Activate WASPs and WAVEs; VEGFA-VEGFR2 Pathway; Regulation of actin dynamics for phagocytic cup formation; Neutrophil degranulation	14	5	0.954	1.032	0.976	0.975	0.815	0.963	1.033	0.996	0.978	0.582	0.968	1.054	0.997	0.915	0.339	0.931	1.01	0.995	0.962	0.165
TRUE	High	Master Protein	Q794F9	4F2 cell-surface antigen heavy chain OS=Rattus norvegicus GN=Slc3a2 PE=1 SV=1	0	FALSE	145.017	24	9	151	9	527	58	5.33	806.95	9	metabolic process;response to stimulus;transport	cell surface;cytosol;membrane;nucleus	catalytic activity;protein binding;RNA binding;transporter activity	Pf00128	50567		Slc3a2	1	Protein digestion and absorption; mTOR signaling pathway			2	0	0.978	0.847	0.926	0.982	1.281	0.975	0.853	0.927	1.034	1.048	0.914	0.82	0.906	0.93	0.592	0.911	0.857	0.939	0.967	0.602
TRUE	High	Master Protein	Q68FY0	Cytochrome b-c1 complex subunit 1, mitochondrial OS=Rattus norvegicus GN=Uqcrc1 PE=1 SV=1	0	FALSE	144.551	44	13	236	12	480	52.8	5.88	1000.59	13	metabolic process;response to stimulus;transport	cytosol;membrane;mitochondrion	catalytic activity;metal ion binding;protein binding	Pf00675, Pf05193, Pf08367	301011	ENSRNOG00000032134.4	Uqcrc1	8	Huntington's disease; Metabolic pathways; Non-alcoholic fatty liver disease (NAFLD); Alzheimer's disease; Cardiac muscle contraction; Parkinson's disease; Oxidative phosphorylation	Electron Transport Chain	Respiratory electron transport	12	1	1.017	0.944	1.024	1.109	0.303	1.008	0.963	1.019	1.128	0.908	1.064	0.969	1.037	1.025	0.552	1.019	0.964	1.013	1.003	1.062
TRUE	High	Master Protein	Q9ERH3	WD repeat-containing protein 7 OS=Rattus norvegicus GN=Wdr7 PE=2 SV=1	0	FALSE	144.39	17	21	212	21	1488	163.1	7.02	855.81	21	cell differentiation		protein binding	Pf00400	66031	ENSRNOG00000018387.4	Wdr7	18				0	0	0.99	1.045	1.001	1.048	0.91	0.982	1.051	1.002	1.125	0.537	1.029	1.143	1.036	1.034	0.339	0.991	1.075	1.002	1.043	0.195
TRUE	High	Master Protein	Q9QYF3	Unconventional myosin-Va OS=Rattus norvegicus GN=Myo5a PE=1 SV=1	0	FALSE	143.706	13	19	144	17	1828	211.6	8.69	571.84	19	cell communication;cell differentiation;cell organization and biogenesis;cellular component movement;metabolic process;regulation of biological process;response to stimulus;transport	cytoplasm;cytosol;endoplasmic reticulum;endosome;extracellular;Golgi;membrane;vacuole	catalytic activity;metal ion binding;motor activity;nucleotide binding;protein binding;RNA binding	Pf00063, Pf00261, Pf00612, Pf00769, Pf01442, Pf01576, Pf01843, Pf02463, Pf04111, Pf04156, Pf05483, Pf05557, Pf05615, Pf05622, Pf06548, Pf07888, Pf07926, Pf08317, Pf09311, Pf09726, Pf09731, Pf09744, Pf10174, Pf10473, Pf12128, Pf13851	25017		Myo5a	8				0	2	1.091	0.972	1.061	0.992	1.005	1.058	0.944	0.985	0.942	1.012	1.051	1.029	1.04	0.895	1.093	1.108	1.029	1.029	0.904	0.871
TRUE	High	Master Protein	B0BMT0	RCG47746, isoform CRA_a OS=Rattus norvegicus GN=Acta2 PE=2 SV=1	0	FALSE	143.634	50	16	434	6	377	42	5.39	1667.26	16	regulation of biological process;response to stimulus	cytoplasm;cytoskeleton	nucleotide binding;protein binding	Pf00022	81633		Acta2	1	Vascular smooth muscle contraction	Myometrial Relaxation and Contraction Pathways; NFE2L2; Striated Muscle Contraction		4	0	1.018	1.154	1.038	1.087	0.975	0.988	1.16	1.041	1.053	0.945	0.988	1.134	0.967	1.027	0.01	1.029	1.215	1.016	1.06	0.676
TRUE	High	Master Protein	G3V6H5	Mitochondrial 2-oxoglutarate/malate carrier protein OS=Rattus norvegicus GN=Slc25a11 PE=3 SV=1	0	FALSE	142.048	35	12	199	12	314	34.1	9.96	980.92	12	transport	membrane;mitochondrion;nucleus	RNA binding;transporter activity	Pf00153	64201	ENSRNOG00000003815.4	Slc25a11	10			Gluconeogenesis	4	0	1.062	0.933	1.021	1.016	1.226	1.058	0.938	1.021	1.039	0.996	1.067	0.966	1.068	1.091	0.475	1.097	0.965	1.032	1.068	0.514
TRUE	High	Master Protein	Q66HF1	NADH-ubiquinone oxidoreductase 75 kDa subunit, mitochondrial OS=Rattus norvegicus GN=Ndufs1 PE=1 SV=1	0	FALSE	140.741	25	16	194	16	727	79.4	5.9	712.09	16	cell organization and biogenesis;metabolic process;transport	membrane;mitochondrion	catalytic activity;metal ion binding	Pf00111, Pf00384, Pf09326, Pf10588, Pf13510	301458	ENSRNOG00000011849.6	Ndufs1	9	Metabolic pathways; Non-alcoholic fatty liver disease (NAFLD); Alzheimer's disease; Huntington's disease; Parkinson's disease; Oxidative phosphorylation	Oxidative phosphorylation; Electron Transport Chain	Complex I biogenesis	13	0	0.93	0.968	1.028	1.04	1.343	0.972	0.97	1.012	0.963	0.806	1.029	1.137	1.045	0.934	0.784	0.985	1.023	0.993	0.979	0.804
TRUE	High	Master Protein	P62716	Serine/threonine-protein phosphatase 2A catalytic subunit beta isoform OS=Rattus norvegicus GN=Ppp2cb PE=1 SV=1	0	FALSE	138.824	52	11	170	11	309	35.6	5.43	683.2	11	cell organization and biogenesis;metabolic process;regulation of biological process;response to stimulus	chromosome;cytoplasm;cytoskeleton;nucleus	catalytic activity;metal ion binding;protein binding	Pf00149	24673	ENSRNOG00000015182.6	Ppp2cb	16	Sphingolipid signaling pathway; Hippo signaling pathway; AMPK signaling pathway; mRNA surveillance pathway; Long-term depression; PI3K-Akt signaling pathway; Chagas disease (American trypanosomiasis); Dopaminergic synapse; Adrenergic signaling in cardiomyocytes; Oocyte meiosis; Tight junction; TGF-beta signaling pathway; Hepatitis C	Wnt Signaling Pathway and Pluripotency; IL-6 Signaling Pathway; Glycogen Metabolism	Signaling by GPCR; PI5P, PP2A and IER3 Regulate PI3K/AKT Signaling; Amplification of signal from unattached kinetochores via a MAD2 inhibitory signal; Spry regulation of FGF signaling; RHO GTPases Activate Formins; Cyclin A/B1/B2 associated events during G2/M transition; CTLA4 inhibitory signaling; Beta-catenin phosphorylation cascade; DARPP-32 events; Activated TLR4 signalling; ERKs are inactiva…	101	0	0.992	1.02	1.098	1.07	0.01	0.925	1.043	1.103	1.116	1.395	0.996	1.123	1.038	0.965	0.636	0.971	1.085	1.014	1.086	2.535
TRUE	High	Master Protein	Q5M7U6	Actin-related protein 2 OS=Rattus norvegicus GN=Actr2 PE=1 SV=1	0	FALSE	138.641	27	9	177	8	394	44.7	6.74	750.54	9	cell division;cell organization and biogenesis;cellular component movement;regulation of biological process;response to stimulus;transport	cytoplasm;cytoskeleton;cytosol;membrane	nucleotide binding;protein binding;structural molecule activity	Pf00022	289820	ENSRNOG00000004959.7	Actr2	14			Regulation of actin dynamics for phagocytic cup formation; Neutrophil degranulation; RHO GTPases Activate WASPs and WAVEs; Clathrin-mediated endocytosis; EPHB-mediated forward signaling	16	0	0.939	1.028	0.961	1.026	1.235	0.968	1.011	1.021	1.022	1.073	1.052	1.011	1.009	0.988	1.337	1.054	1.01	1.012	0.985	0.652
TRUE	High	Master Protein	Q5BJT9	Creatine kinase, mitochondrial 1, ubiquitous OS=Rattus norvegicus GN=Ckmt1b PE=2 SV=1	0	FALSE	136.215	29	13	294	2	418	46.9	8.32	1158.78	13	metabolic process;regulation of biological process	membrane;mitochondrion	catalytic activity;nucleotide binding;protein binding	Pf00217, Pf02807	29593	ENSRNOG00000014573.6	Ckmt1b; Ckmt1	3	Arginine and proline metabolism; Metabolic pathways		Creatine metabolism	6	13	1.027	0.941	1.007	1.009	1.37	1.037	0.968	1.046	1.044	1.294	0.914	0.924	0.986	0.971	0.571	0.93	0.947	0.958	0.911	0.533
TRUE	High	Master Protein	Q62950	Dihydropyrimidinase-related protein 1 OS=Rattus norvegicus GN=Crmp1 PE=1 SV=1	0	FALSE	135.902	22	12	233	10	572	62.2	7.12	904.15	12	cell organization and biogenesis;cellular component movement;regulation of biological process;response to stimulus	cytoplasm;cytoskeleton;cytosol	catalytic activity;protein binding	Pf01979, Pf07969, Pf13147, Pf13594	25415	ENSRNOG00000004781.6	Crmp1	14			CRMPs in Sema3A signaling	4	1	0.995	1.079	1.007	1.096	0.827	0.965	1.117	1	1.076	0.909	0.909	1.084	1.009	0.989	1.009	0.962	1.167	1.036	1.127	0.397
TRUE	High	Master Protein	P11505	Plasma membrane calcium-transporting ATPase 1 OS=Rattus norvegicus GN=Atp2b1 PE=2 SV=2	0	FALSE	135.789	13	17	229	9	1258	138.6	6	841.24	17	cell communication;cellular homeostasis;response to stimulus;transport	membrane;nucleus	catalytic activity;metal ion binding;nucleotide binding;protein binding;transporter activity	Pf00122, Pf00689, Pf00690, Pf00702, Pf08282, Pf12424, Pf12710, Pf13246	29598		Atp2b1	7	Endocrine and other factor-regulated calcium reabsorption; Mineral absorption; cAMP signaling pathway; Pancreatic secretion; Salivary secretion; Calcium signaling pathway; cGMP-PKG signaling pathway; Adrenergic signaling in cardiomyocytes	Calcium Regulation in the Cardiac Cell	Ion homeostasis; Ion transport by P-type ATPases; Reduction of cytosolic Ca++ levels	19	0	0.927	1.039	1.028	0.977	0.338	0.902	1	1.041	0.859	0.01	0.993	0.978	0.979	0.916	0.656	0.899	0.948	0.949	0.802	0.711
TRUE	High	Master Protein	P49432	Pyruvate dehydrogenase E1 component subunit beta, mitochondrial OS=Rattus norvegicus GN=Pdhb PE=1 SV=2	0	FALSE	135.695	21	5	202	5	359	39	6.65	925.56	5	metabolic process	mitochondrion;nucleus;organelle lumen	catalytic activity	Pf02779, Pf02780	289950	ENSRNOG00000007895.5	Pdhb	15	Central carbon metabolism in cancer; Pyruvate metabolism; Glucagon signaling pathway; Citrate cycle (TCA cycle); Glycolysis / Gluconeogenesis; Carbon metabolism; HIF-1 signaling pathway; Metabolic pathways	Glycolysis and Gluconeogenesis; TCA Cycle; Hexoses metabolism in proximal tubules	Glyoxylate metabolism and glycine degradation; Signaling by Retinoic Acid; Regulation of pyruvate dehydrogenase (PDH) complex	21	0	1.008	0.915	0.996	0.924	1.012	1.011	0.931	0.981	0.979	1.181	1.001	0.878	1.027	0.937	1.144	1.043	0.907	1.04	0.964	1.503
TRUE	High	Master Protein	G3V928	Protein Lrp1 OS=Rattus norvegicus GN=Lrp1 PE=4 SV=1	0	FALSE	134.46	7	27	135	26	4545	504.6	5.36	430.18	27	cell proliferation;metabolic process;regulation of biological process;response to stimulus;transport	cytosol;endosome;membrane	metal ion binding;protein binding;receptor activity;RNA binding	Pf00057, Pf00058, Pf07645, Pf12662, Pf14670	299858	ENSRNOG00000025053.5	Lrp1	7	Alzheimer's disease; Malaria	Statin Pathway; Wnt Signaling Pathway NetPath; Cholesterol metabolism	Signaling by GPCR; Retinoid metabolism and transport; Scavenging of heme from plasma	15	1	1.098	0.989	1.035	0.964	0.942	1.09	1.01	0.994	0.961	1.009	1.064	1.011	1.055	1.047	0.813	1.092	1.01	1.045	1.025	1.332
TRUE	High	Master Protein	P63319	Protein kinase C gamma type OS=Rattus norvegicus GN=Prkcg PE=1 SV=1	0	FALSE	134.342	24	14	177	13	697	78.3	7.46	707.88	14	cell communication;metabolic process;regulation of biological process;response to stimulus	cytoplasm;cytosol;membrane;nucleus	catalytic activity;metal ion binding;nucleotide binding;protein binding	Pf00069, Pf00130, Pf00168, Pf00433, Pf07714	24681	ENSRNOG00000054371.1	Prkcg	1	Tight junction; Amoebiasis; Melanogenesis; Dopaminergic synapse; Morphine addiction; Long-term depression; Insulin secretion; Aldosterone-regulated sodium reabsorption; Cholinergic synapse; Gastric acid secretion; ErbB signaling pathway; Choline metabolism in cancer; Circadian entrainment; Rap1 signaling pathway; HIF-1 signaling pathway; Long-term potentiation; Glioma; Ras signaling pathway; Infl…	Myometrial Relaxation and Contraction Pathways; CFTR activity in the plasma membrane; NFE2L2; Calcium Regulation in the Cardiac Cell; MAPK signaling pathway; Wnt Signaling Pathway NetPath; Angiotensin signaling in thick ascending limbs; EGFR1 Signaling Pathway; Wnt Signaling Pathway; G Protein Signaling Pathways	Signaling by GPCR; Disinhibition of SNARE formation; WNT5A-dependent internalization of FZD4; Trafficking of GluR2-containing AMPA receptors; Calmodulin induced events	85	1	0.853	1.003	0.976	0.897	0.781	0.901	0.947	0.969	0.84	0.717	0.897	0.914	1.016	0.863	1.432	0.923	0.92	1.031	0.851	1.214
TRUE	High	Master Protein	P46462	Transitional endoplasmic reticulum ATPase OS=Rattus norvegicus GN=Vcp PE=1 SV=3	0	FALSE	133.012	22	14	209	14	806	89.3	5.26	784.04	14	cell communication;cell organization and biogenesis;metabolic process;regulation of biological process;response to stimulus;transport	cytoplasm;cytosol;endoplasmic reticulum;membrane;nucleus;proteasome	catalytic activity;enzyme regulator activity;nucleotide binding;protein binding;RNA binding	Pf00004, Pf00910, Pf01057, Pf01078, Pf02359, Pf02933, Pf05496, Pf05673, Pf06068, Pf07724, Pf07726, Pf07728, Pf09336, Pf13191, Pf13207, Pf13401	116643	ENSRNOG00000034242.3	Vcp	5	Protein processing in endoplasmic reticulum; Legionellosis	IL-9 Signaling Pathway	ABC-family proteins mediated transport; HSF1 activation; Neutrophil degranulation; Hedgehog ligand biogenesis; Translesion Synthesis by POLH; Ovarian tumor domain proteases; N-glycan trimming in the ER and Calnexin/Calreticulin cycle	25	0	0.953	1.122	1.021	0.996	0.955	0.987	1.125	1.007	1.001	1.27	0.981	1.102	1.006	1.061	0.659	0.966	1.102	0.985	1.034	1.416
TRUE	High	Master Protein	D4A8U7	Dynactin 1, isoform CRA_a OS=Rattus norvegicus GN=Dctn1 PE=4 SV=2	0	FALSE	130.479	16	14	121	14	1281	141.9	5.9	575.5	14	cell division;cell organization and biogenesis;cellular component movement;regulation of biological process;transport	chromosome;cytoskeleton;cytosol;membrane	catalytic activity;motor activity;protein binding	Pf01302, Pf05622, Pf05667, Pf06160, Pf12128, Pf12455, Pf15035	29167	ENSRNOG00000010048.6	Dctn1	4			Regulation of PLK1 Activity at G2/M Transition; HSP90 chaperone cycle for steroid hormone receptors (SHR); AURKA Activation by TPX2; Recruitment of mitotic centrosome proteins and complexes; Loss of Nlp from mitotic centrosomes; Anchoring of the basal body to the plasma membrane; MHC class II antigen presentation; COPI-independent Golgi-to-ER retrograde traffic; Recruitment of NuMA to mitotic cen…	33	0	0.963	1.012	0.974	1.11	1.127	0.883	1.055	1.014	0.957	2.098	0.934	0.968	0.973	1.134	1.484	1.013	1.019	0.978	1.006	1.023
TRUE	High	Master Protein	Q6T487	Brain-specific alpha actinin 1 isoform OS=Rattus norvegicus GN=Actn1 PE=2 SV=1	0	FALSE	129.687	16	13	175	4	914	105.4	5.39	655.65	13	cell differentiation;cell organization and biogenesis;regulation of biological process	cytoplasm;cytoskeleton;cytosol;membrane;nucleus	metal ion binding;protein binding;RNA binding	Pf00036, Pf00307, Pf00435, Pf08726, Pf11971, Pf13405, Pf13833	81634	ENSRNOG00000056756.1	Actn1	6		Focal Adhesion; Regulation of Actin Cytoskeleton		2	2	1.003	1.067	1.056	1.027	0.701	1.068	1.109	1.085	1.018	1.37	0.962	0.992	1.022	1.029	1.046	0.974	1.013	1.002	1.044	1.378
TRUE	High	Master Protein	F1LZG4	Uncharacterized protein OS=Rattus norvegicus PE=4 SV=2	0	FALSE	128.316	34	8	288	1	317	36.1	8.43	1107.38	8	metabolic process		catalytic activity;nucleotide binding	Pf00069, Pf07714						ErbB signaling pathway; PKA-HCG-Glycogen Syntase		2	0
TRUE	High	Master Protein	F1M9V7	Protein Npepps OS=Rattus norvegicus GN=Npepps PE=2 SV=1	0	FALSE	126.835	17	14	206	14	920	103.3	5.77	744.91	14	metabolic process;response to stimulus	cytoplasm;cytosol	catalytic activity;metal ion binding	Pf01433, Pf11838, Pf13485	50558	ENSRNOG00000023095.5	Npepps	10			Antigen processing: Ubiquitination & Proteasome degradation	4	0	0.943	0.998	1.026	1.019	0.96	0.999	1.015	1.046	1.052	0.779	0.966	0.993	0.993	1.069	0.959	0.968	1.025	1.019	1.102	0.761
TRUE	High	Master Protein	G3V8R2	Neurocan core protein OS=Rattus norvegicus GN=Ncan PE=4 SV=1	0	FALSE	125.658	16	20	157	19	1263	136.2	5.54	608.84	20	regulation of biological process	membrane	metal ion binding;protein binding;structural molecule activity	Pf00008, Pf00059, Pf00084, Pf00193	58982	ENSRNOG00000048036.2	Ncan; LOC102550316	16		Spinal Cord Injury	Dermatan sulfate biosynthesis; A tetrasaccharide linker sequence is required for GAG synthesis; Chondroitin sulfate biosynthesis; CS/DS degradation; ECM proteoglycans	12	1	0.863	1.003	0.951	0.852	0.754	0.869	1.062	0.998	0.916	0.01	0.89	1.06	0.93	0.942	0.858	0.907	1.022	0.962	1.018	1.177
TRUE	High	Master Protein	Q641Y2	NADH dehydrogenase [ubiquinone] iron-sulfur protein 2, mitochondrial OS=Rattus norvegicus GN=Ndufs2 PE=1 SV=1	0	FALSE	123.894	29	10	166	10	463	52.5	6.99	692.2	10	metabolic process;response to stimulus;transport	membrane;mitochondrion	catalytic activity;metal ion binding;nucleotide binding;protein binding	Pf00346	289218	ENSRNOG00000038372.4	Ndufs2	13	Metabolic pathways; Non-alcoholic fatty liver disease (NAFLD); Alzheimer's disease; Huntington's disease; Parkinson's disease; Oxidative phosphorylation	Oxidative phosphorylation; Electron Transport Chain	Complex I biogenesis	13	0	1.039	0.971	0.985	0.946	0.699	1.084	0.988	0.957	0.913	0.639	1.023	0.926	1.027	0.992	1.182	1.076	0.917	1.038	0.943	1.063
TRUE	High	Master Protein	Q5XI78	2-oxoglutarate dehydrogenase, mitochondrial OS=Rattus norvegicus GN=Ogdh PE=1 SV=1	0	FALSE	123.431	20	17	190	13	1023	116.2	6.77	706.6	17	cellular component movement;metabolic process	cytosol;membrane;mitochondrion;organelle lumen	catalytic activity;metal ion binding;protein binding	Pf00676, Pf02779	360975; 103693780	ENSRNOG00000005130.7	Ogdh; LOC103693780	14	Carbon metabolism; Lysine degradation; Tryptophan metabolism; Metabolic pathways; Citrate cycle (TCA cycle)	Tryptophan metabolism; TCA Cycle	Glyoxylate metabolism and glycine degradation; Citric acid cycle (TCA cycle); Lysine catabolism	15	4	1.023	1.004	1.07	1.079	1.323	1.037	1.027	1.059	1.062	0.833	1.067	1.034	0.992	1.048	1.578	1.066	0.975	1.034	1.083	1.385
TRUE	High	Master Protein	Q8R2H0	ATPase, H+ transporting, V1 subunit G isoform 2 OS=Rattus norvegicus GN=Atp6v1g2 PE=4 SV=1	0	FALSE	123.315	45	4	130	4	118	13.7	10.26	639.93	4	transport		catalytic activity;transporter activity	Pf03179	368044	ENSRNOG00000000840.6	Atp6v1g2	20	mTOR signaling pathway; Oxidative phosphorylation; Metabolic pathways; Phagosome; Collecting duct acid secretion; Rheumatoid arthritis; Synaptic vesicle cycle		Ion channel transport; Transferrin endocytosis and recycling; Insulin receptor recycling; ROS, RNS production in phagocytes	18	0	1.081	1.006	0.964	0.977	1.953	1.094	1.03	0.96	0.946	1.253	1.038	1.024	1.032	0.953	0.554	1.101	1.002	1.012	0.978	0.618
TRUE	High	Master Protein	Q9JHU0	Dihydropyrimidinase-related protein 5 OS=Rattus norvegicus GN=Dpysl5 PE=1 SV=1	0	FALSE	122.614	34	16	164	16	564	61.5	7.08	581.59	16	cell differentiation;cellular component movement	cytoplasm	catalytic activity;protein binding	Pf01979, Pf13147, Pf13594	65208	ENSRNOG00000008996.6	LOC100910964; Dpysl5	6	Axon guidance			1	0	0.985	1.242	1.076	0.935	0.782	1.015	1.146	0.963	0.959	0.864	1.013	1.23	1.063	1.078	0.01	1.022	1.227	1.071	1.027	0.509
TRUE	High	Master Protein	D3ZH00	Plasma membrane calcium-transporting ATPase 4 OS=Rattus norvegicus GN=Atp2b4 PE=3 SV=2	0	FALSE	122.252	13	16	209	1	1165	128.3	7.12	742.41	16			catalytic activity;metal ion binding;nucleotide binding;transporter activity	Pf00122, Pf00689, Pf00690, Pf00702, Pf08282, Pf12424, Pf12710, Pf13246								0	0	0.971	1.036	0.996	1.176	0.01	0.879	0.995	1.043	1.362	1.281	0.997	1.037	1.008	1.236	0.01	0.969	0.964	1.068	1.262	0.01
TRUE	High	Master Protein	D4A5G8	Protein Pdha1l1 OS=Rattus norvegicus GN=Pdha1l1 PE=4 SV=2	0	FALSE	122.117	37	15	222	15	393	43.6	8.19	778.34	15	metabolic process		catalytic activity	Pf00676								0	0	0.982	0.996	1.019	0.993	1.032	0.99	1.02	0.997	0.942	1.046	0.967	0.969	1.001	0.998	0.379	0.955	0.944	0.988	0.978	1.22
TRUE	High	Master Protein	P12369	cAMP-dependent protein kinase type II-beta regulatory subunit OS=Rattus norvegicus GN=Prkar2b PE=1 SV=3	0	FALSE	120.454	34	9	155	8	416	46.1	4.98	685.52	9	metabolic process;regulation of biological process;response to stimulus	cytoplasm;membrane	catalytic activity;enzyme regulator activity;nucleotide binding;protein binding	Pf00027, Pf02197	24679	ENSRNOG00000009079.6	Prkar2b	6	Insulin signaling pathway	Myometrial Relaxation and Contraction Pathways; Calcium Regulation in the Cardiac Cell; G Protein Signaling Pathways	Signaling by GPCR; Regulation of PLK1 Activity at G2/M Transition; Hedgehog 'off' state; AURKA Activation by TPX2; Recruitment of mitotic centrosome proteins and complexes; DARPP-32 events; Loss of Nlp from mitotic centrosomes; Anchoring of the basal body to the plasma membrane; Vasopressin regulates renal water homeostasis via Aquaporins; PKA activation in glucagon signalling; Factors involved i…	44	2	0.999	0.997	1.095	1.084	1.22	1.027	1.018	1.098	1.112	1.385	1.087	1.08	1.175	1.098	0.515	1.092	1.063	1.16	1.124	0.558
TRUE	High	Master Protein	D3ZAN3	Alpha glucosidase 2 alpha neutral subunit (Predicted) OS=Rattus norvegicus GN=Ganab PE=4 SV=1	0	FALSE	118.703	25	15	105	15	797	90.5	6.2	471.05	15	metabolic process	membrane	catalytic activity;RNA binding	Pf01055, Pf13802	293721	ENSRNOG00000019724.6	Ganab	1	N-Glycan biosynthesis; Protein processing in endoplasmic reticulum; Metabolic pathways		Calnexin/calreticulin cycle	8	0	1.044	1.016	0.934	0.95	0.749	1.006	1.004	0.979	0.984	0.89	1.008	1.056	1.019	0.96	1.743	1	0.971	0.991	1.007	0.399
TRUE	High	Master Protein	P63039	60 kDa heat shock protein, mitochondrial OS=Rattus norvegicus GN=Hspd1 PE=1 SV=1	0	FALSE	118.094	21	10	165	6	573	60.9	6.18	797.76	10	cell organization and biogenesis;cell proliferation;metabolic process;regulation of biological process;response to stimulus;transport	cell surface;cytoplasm;cytosol;endoplasmic reticulum;endosome;Golgi;membrane;mitochondrion;organelle lumen	catalytic activity;nucleotide binding;protein binding;RNA binding	Pf00118	63868	ENSRNOG00000014525.5	Hspd1	9	Legionellosis; Tuberculosis; Type I diabetes mellitus; RNA degradation			4	4	0.993	1.012	0.963	1.027	0.684	1.026	0.984	0.958	1.059	1.192	1.006	1.086	0.98	1.046	0.774	1.067	1.076	0.999	1.057	0.283
TRUE	High	Master Protein	Q9QXQ0	Alpha-actinin-4 OS=Rattus norvegicus GN=Actn4 PE=1 SV=2	0	FALSE	117.763	20	15	127	8	911	104.8	5.44	481.29	15	cell organization and biogenesis;cellular component movement;regulation of biological process;response to stimulus;transport	cytoplasm;cytoskeleton;cytosol;nucleus	DNA binding;metal ion binding;protein binding;RNA binding	Pf00307, Pf00435, Pf08726, Pf11971, Pf13499	63836	ENSRNOG00000020433.7	Actn4	1	Tight junction; Viral carcinogenesis; Focal adhesion; Systemic lupus erythematosus; Amoebiasis; Adherens junction; Regulation of actin cytoskeleton; Leukocyte transendothelial migration; Arrhythmogenic right ventricular cardiomyopathy (ARVC)	Striated Muscle Contraction	Platelet degranulation	14	8	0.977	1.018	1.019	1.178	1.254	0.87	1.122	1.008	1.112	0.517	0.994	1.065	1.07	1.091	1.483	0.962	1.021	1.04	1.084	1.569
TRUE	High	Master Protein	P61765	Syntaxin-binding protein 1 OS=Rattus norvegicus GN=Stxbp1 PE=1 SV=1	0	FALSE	117.519	21	12	304	11	594	67.5	6.96	1019.76	12	cell communication;cell organization and biogenesis;regulation of biological process;response to stimulus;transport	cytoplasm;cytoskeleton;cytosol;membrane;mitochondrion;nucleus	protein binding;RNA binding	Pf00995	25558	ENSRNOG00000015420.8	Stxbp1	3	Synaptic vesicle cycle	Insulin Signaling; EGFR1 Signaling Pathway	Glutamate Neurotransmitter Release Cycle; Acetylcholine Neurotransmitter Release Cycle; Norepinephrine Neurotransmitter Release Cycle; GABA synthesis, release, reuptake and degradation	10	1	0.892	1.031	0.973	0.915	0.323	0.881	1.026	0.998	0.945	0.243	0.903	1.068	1.034	0.928	0.01	0.883	1.048	0.988	0.902	0.525
TRUE	High	Master Protein	F1LRV4	Heat shock 70 kDa protein 4 OS=Rattus norvegicus GN=Hspa4 PE=3 SV=1	0	FALSE	117.501	15	9	155	9	840	94	5.21	645.15	9	cell organization and biogenesis;transport	cytosol	nucleotide binding	Pf00012, Pf06723		ENSRNOG00000016596.3		10				0	0	0.954	0.933	1.017	0.988	0.962	0.951	0.94	1.032	0.967	0.798	0.898	0.932	0.998	0.97	1.32	0.923	0.971	0.999	0.957	0.186
TRUE	High	Master Protein	P63245	Guanine nucleotide-binding protein subunit beta-2-like 1 OS=Rattus norvegicus GN=Gnb2l1 PE=1 SV=3	0	FALSE	116.959	51	10	144	10	317	35.1	7.69	669.35	10	cell death;cell differentiation;cellular homeostasis;development;metabolic process;regulation of biological process;response to stimulus	cytoplasm;cytosol;membrane;mitochondrion;nucleus;ribosome	enzyme regulator activity;protein binding;RNA binding	Pf00400	83427; 100911540	ENSRNOG00000049070.2; ENSRNOG00000052620.1	Gnb2l1; Rack1; LOC100911540	10; 12	Measles	CFTR activity in the plasma membrane; IL-3 Signaling Pathway; TNF-alpha NF-kB Signaling Pathway; IL-2 Signaling Pathway	TNFR1-mediated ceramide production; TNFR1-induced NFkappaB signaling pathway; Regulation of TNFR1 signaling	11	0	1.103	0.989	1.023	0.968	0.951	1.053	1.008	1.007	0.946	0.916	1.113	1.06	0.951	0.815	0.332	1.128	1.032	0.979	0.855	0.788
TRUE	High	Master Protein	P12839	Neurofilament medium polypeptide OS=Rattus norvegicus GN=Nefm PE=1 SV=4	0	FALSE	116.254	17	13	175	10	846	95.7	4.79	729.6	13	cell organization and biogenesis;cellular component movement;regulation of biological process;response to stimulus;transport	cytoskeleton	protein binding;structural molecule activity	Pf00038, Pf07888, Pf10186, Pf12128	24588		Nefm	15	Amyotrophic lateral sclerosis (ALS)			1	0	0.884	0.85	0.82	0.751	0.28	0.945	0.754	0.76	0.742	1.31	0.943	0.754	0.775	0.692	1.756	0.84	0.848	0.81	0.681	0.01
TRUE	High	Master Protein	Q05140	Clathrin coat assembly protein AP180 OS=Rattus norvegicus GN=Snap91 PE=1 SV=1	0	FALSE	115.683	10	7	233	5	915	93.5	4.93	940.83	7	cell communication;cell organization and biogenesis;regulation of biological process;transport	cytosol;membrane	protein binding	Pf01417, Pf07651	65178		Snap91	8				0	2	0.916	0.98	0.948	1.027	0.814	0.969	0.998	0.952	0.961	0.571	0.904	0.94	0.986	1.007	0.23	0.871	0.91	0.94	0.974	0.935
TRUE	High	Master Protein	P55161	Nck-associated protein 1 OS=Rattus norvegicus GN=Nckap1 PE=2 SV=1	0	FALSE	115.59	18	16	128	16	1128	128.8	6.61	464.76	16	cell organization and biogenesis;cellular component movement;regulation of biological process;response to stimulus	membrane	protein binding	Pf09735	58823		Nckap1	3	Regulation of actin cytoskeleton	Regulation of Actin Cytoskeleton		2	0	0.987	0.894	1.017	0.989	0.734	0.968	0.912	1.047	0.979	1.023	1.02	0.975	0.978	0.947	1.29	1.039	0.945	0.951	0.924	0.934
TRUE	High	Master Protein	Q62952	Dihydropyrimidinase-related protein 3 OS=Rattus norvegicus GN=Dpysl3 PE=1 SV=2	0	FALSE	115.355	24	11	199	8	570	61.9	6.49	778.28	11	cell organization and biogenesis;regulation of biological process;response to stimulus	cytoplasm;cytosol	catalytic activity;protein binding	Pf01979, Pf04909, Pf13147, Pf13594	25418	ENSRNOG00000018992.7	Dpysl3	18			CRMPs in Sema3A signaling	4	0	0.937	1.069	0.976	0.98	1.169	0.925	1.102	1.015	0.968	0.983	0.918	1.31	0.976	0.905	1.134	0.888	1.198	0.978	0.906	0.707
TRUE	High	Master Protein	M0RD14	Pyruvate kinase OS=Rattus norvegicus PE=3 SV=1	0	FALSE	114.731	27	12	249	3	486	52.8	7.83	899.39	12	metabolic process		catalytic activity;metal ion binding	Pf00224, Pf02887								0	0	1.071	1.025	0.852	1.033	1.995	1.031	0.949	1.077	1.062	0.955	0.967	1.034	1.064	1.175	0.01	0.967	0.988	1.036	1.278	1.456
TRUE	High	Master Protein	P85845	Fascin OS=Rattus norvegicus GN=Fscn1 PE=1 SV=2	0	FALSE	114.367	31	13	201	13	493	54.5	6.74	767.09	13	cell communication;cell organization and biogenesis;cellular component movement;regulation of biological process;response to stimulus	cytoplasm;cytoskeleton;cytosol;membrane	protein binding;RNA binding	Pf06268	683788		Fscn1; LOC683788	12				0	0	0.935	1.12	1.035	0.999	0.354	0.926	1.083	0.999	0.958	1.332	0.938	1.082	0.998	0.972	0.01	0.953	1.07	1.033	0.976	0.405
TRUE	High	Master Protein	Q68FX0	Isocitrate dehydrogenase [NAD] subunit beta, mitochondrial OS=Rattus norvegicus GN=Idh3B PE=1 SV=1	0	FALSE	114.005	19	6	236	6	385	42.3	8.75	924.09	6	metabolic process	mitochondrion;nucleus	catalytic activity;metal ion binding;nucleotide binding	Pf00180	94173	ENSRNOG00000007316.6	Idh3B	3	2-Oxocarboxylic acid metabolism; Citrate cycle (TCA cycle); Biosynthesis of amino acids; Metabolic pathways; Carbon metabolism	TCA Cycle	Citric acid cycle (TCA cycle)	10	0	0.997	1.007	1.012	1.013	0.87	0.995	0.998	1.006	1.04	1.246	1.002	1.123	0.999	1.184	1.927	1.022	1.06	1.006	1.115	1.899
TRUE	High	Master Protein	P52873	Pyruvate carboxylase, mitochondrial OS=Rattus norvegicus GN=Pc PE=1 SV=2	0	FALSE	112.105	22	21	81	21	1178	129.7	6.81	275.93	21	metabolic process;regulation of biological process	cytoplasm;membrane;mitochondrion;organelle lumen	catalytic activity;DNA binding;metal ion binding;nucleotide binding;protein binding	Pf00289, Pf00364, Pf00682, Pf02222, Pf02436, Pf02785, Pf02786, Pf07478, Pf08443, Pf13535, Pf15632	25104	ENSRNOG00000019372.6	Pc	1	Pyruvate metabolism; Biosynthesis of amino acids; Carbon metabolism; Metabolic pathways; Citrate cycle (TCA cycle)	Alanine and aspartate metabolism; Glycolysis and Gluconeogenesis; TCA Cycle; Hexoses metabolism in proximal tubules; Fatty Acid Biosynthesis	Biotin transport and metabolism; Gluconeogenesis	17	0						0.985	1.225	1.113	0.954	0.01	1.031	0.967	1.015	1.013	0.01	0.963	1.057	1.01	1.014	0.842
TRUE	High	Master Protein	Q6PW35	Neuronal cell adhesion molecule long isoform Nc7 OS=Rattus norvegicus PE=2 SV=1	0	FALSE	111.988	12	11	91	11	1194	131.9	6.01	395.7	11	cell organization and biogenesis;cellular component movement;regulation of biological process	extracellular;membrane	protein binding	Pf00041, Pf00047, Pf07679, Pf07686, Pf08205, Pf13882, Pf13895, Pf13927	497815		Nrcam	6				0	0	0.921	1.082	1.009	1.011	0.535	0.955	1.088	0.976	0.981	1.44	1.296	1.374	0.944	0.873	1.217	1.068	1.093	0.985	0.853	0.695
TRUE	High	Master Protein	B0LPN4	Ryanodine receptor 2 OS=Rattus norvegicus GN=Ryr2 PE=1 SV=2	0	FALSE	111.447	5	21	85	18	4953	562.6	6.1	314.95	21	cell communication;cell death;cellular homeostasis;development;regulation of biological process;response to stimulus;transport	cytoplasm;endoplasmic reticulum;membrane	metal ion binding;protein binding;transporter activity	Pf00520, Pf00622, Pf01365, Pf02026, Pf02815, Pf06459, Pf08454, Pf08709, Pf13499, Pf14070	689560		Ryr2	17	Hypertrophic cardiomyopathy (HCM); Pancreatic secretion; Arrhythmogenic right ventricular cardiomyopathy (ARVC); Calcium signaling pathway; Dilated cardiomyopathy; Adrenergic signaling in cardiomyocytes; Cardiac muscle contraction; cAMP signaling pathway; Insulin secretion; Oxytocin signaling pathway; Circadian entrainment	Myometrial Relaxation and Contraction Pathways; Calcium Regulation in the Cardiac Cell		13	3	0.967	0.997	0.976	0.904	0.421	0.962	1.093	0.98	1.057	1.87	1.041	1.044	0.989	1.166	3.593	1.049	0.936	0.932	0.936	0.636
TRUE	High	Master Protein	P02770	Serum albumin OS=Rattus norvegicus GN=Alb PE=1 SV=2	0	FALSE	111.363	21	11	335	11	608	68.7	6.48	1331.47	11	cell communication;regulation of biological process;response to stimulus;transport	cytoplasm;endoplasmic reticulum;extracellular;Golgi;nucleus	DNA binding;metal ion binding;protein binding	Pf00273	24186		Alb	14	Thyroid hormone synthesis			1	0	0.882	0.996	0.923	0.765	0.388	0.873	0.999	0.936	0.783	0.7	0.908	1.069	0.929	0.781	0.131	0.909	1.149	0.92	0.742	0.166
TRUE	High	Master Protein	Q3ZB97	Adaptor-related protein complex 2, beta 1 subunit, isoform CRA_b OS=Rattus norvegicus GN=Ap2b1 PE=2 SV=1	0	FALSE	110.655	12	12	205	3	951	105.6	5.34	724.77	12	cell communication;cell organization and biogenesis;transport	cytoplasm;membrane	protein binding;transporter activity	Pf01602, Pf02883, Pf09066, Pf12717, Pf13646	140670	ENSRNOG00000061543.1	Ap2b1; LOC100912146	10	Synaptic vesicle cycle; Huntington's disease; Endocytosis; Endocrine and other factor-regulated calcium reabsorption			4	10	1.045	1.03	1.013	1.099	1.421	1.024	1.051	1.019	1.111	0.598	0.949	1.019	1.012	0.972	0.01	1.036	1.082	0.982	0.915	0.816
TRUE	High	Master Protein	P04897	Guanine nucleotide-binding protein G(i) subunit alpha-2 OS=Rattus norvegicus GN=Gnai2 PE=1 SV=3	0	FALSE	110.436	29	9	109	6	355	40.5	5.45	428.71	9	cell division;cell proliferation;regulation of biological process;response to stimulus	cytoplasm;cytoskeleton;cytosol;membrane;nucleus	catalytic activity;metal ion binding;nucleotide binding;protein binding;signal transducer activity	Pf00025, Pf00503	81664	ENSRNOG00000016592.6	Gnai2	8	Axon guidance; Estrogen signaling pathway; Melanogenesis; Sphingolipid signaling pathway; Pertussis; Leukocyte transendothelial migration; Oxytocin signaling pathway; Morphine addiction; Pathways in cancer; cGMP-PKG signaling pathway; Cocaine addiction; Renin secretion; Gastric acid secretion; Regulation of lipolysis in adipocytes; Glutamatergic synapse; GABAergic synapse; Tight junction; Rap1 si…	Signal Transduction of S1P; Calcium Regulation in the Cardiac Cell; G Protein Signaling Pathways	ADP signalling through P2Y purinoceptor 12; Adenylate cyclase inhibitory pathway; Cooperation of PDCL (PhLP1) and TRiC/CCT in G-protein beta folding; G-protein activation; Adrenaline,noradrenaline inhibits insulin secretion; PLC beta mediated events	65	3	0.919	1.01	0.874	1.133	0.01	0.986	1.157	0.979	1.123	0.01	0.887	1.095	1.042	1.022	1.844	0.934	1.097	1.1	1.054	1.248
TRUE	High	Master Protein	D3ZHY9	Protein Rasal1 OS=Rattus norvegicus GN=Rasal1 PE=4 SV=2	0	FALSE	110.003	24	19	201	19	801	89.5	6.35	705.74	19	regulation of biological process;response to stimulus	cytoplasm;cytosol;membrane	enzyme regulator activity;metal ion binding;protein binding	Pf00168, Pf00169, Pf00616, Pf00779	360814	ENSRNOG00000001374.6	Rasal1	12	Ras signaling pathway		Interleukin-20 family signaling; Regulation of RAS by GAPs	10	0	0.941	1.054	1.087	1.026	0.833	0.965	1.03	1.08	1.058	0.824	0.94	1.059	1.094	1.102	0.44	0.917	1.046	1.074	1.117	1.451
TRUE	High	Master Protein	Q6P9Y4	ADP/ATP translocase 1 OS=Rattus norvegicus GN=Slc25a4 PE=2 SV=1	0	FALSE	109.902	42	11	239	4	298	32.9	9.74	771.5	11	cell organization and biogenesis;regulation of biological process;response to stimulus;transport	membrane;mitochondrion;nucleus	protein binding;transporter activity	Pf00153	85333	ENSRNOG00000010830.4	Slc25a4	16		Electron Transport Chain	Regulation of insulin secretion	4	7	1.022	0.854	1.008	1.114	1.002	1	0.89	0.987	1.064	0.918	1.006	0.827	0.984	1.02	1.023	1.059	0.842	0.981	1.015	1.225
TRUE	High	Master Protein	P20788	Cytochrome b-c1 complex subunit Rieske, mitochondrial OS=Rattus norvegicus GN=Uqcrfs1 PE=1 SV=2	0	FALSE	109.497	25	6	136	6	274	29.4	8.87	775.84	6	metabolic process;response to stimulus;transport	membrane;mitochondrion	catalytic activity;metal ion binding;protein binding;transporter activity	Pf00355, Pf02921, Pf09165	291103	ENSRNOG00000018281.6	Uqcrfs1	17	Oxidative phosphorylation; Non-alcoholic fatty liver disease (NAFLD); Huntington's disease; Metabolic pathways; Alzheimer's disease; Cardiac muscle contraction; Parkinson's disease	Electron Transport Chain	Respiratory electron transport	12	0	0.894	1.053	0.92	1.035	0.589	0.908	1.006	0.915	1.026	1.294	1.001	0.873	0.917	0.934	1	0.985	0.868	0.917	0.942	1.052
TRUE	High	Master Protein	P16638	ATP-citrate synthase OS=Rattus norvegicus GN=Acly PE=1 SV=1	0	FALSE	109.185	18	16	146	16	1100	120.6	7.34	469.2	16	metabolic process	cytoplasm;cytosol;membrane;mitochondrion	catalytic activity;metal ion binding;nucleotide binding	Pf00285, Pf00549, Pf02629	24159		Acly	10	Citrate cycle (TCA cycle); Metabolic pathways	Hexoses metabolism in proximal tubules; Fatty Acid Biosynthesis		4	0	1.03	1.028	0.999	0.994	1.286	1.055	1.044	1.012	1.032	1.078	1.034	0.984	1.047	1.064	0.604	1.042	1.068	1.05	1.091	1.267
TRUE	High	Master Protein	O35303	Dynamin-1-like protein OS=Rattus norvegicus GN=Dnm1l PE=1 SV=1	0	FALSE	109.185	21	15	181	15	755	83.9	7.08	664.72	15	cell death;cell organization and biogenesis;regulation of biological process;response to stimulus;transport	cytoplasm;cytoskeleton;cytosol;endoplasmic reticulum;Golgi;membrane;mitochondrion	catalytic activity;nucleotide binding;protein binding	Pf00350, Pf01031, Pf02212	114114	ENSRNOG00000001813.8	Dnm1l	11	TNF signaling pathway; NOD-like receptor signaling pathway		Apoptotic execution phase	5	0	1.26	1.072	0.981	0.947	0.481	1.266	1.165	1.003	0.935	0.587	1.109	1.025	0.995	0.982	0.92	1.088	0.995	0.986	0.979	0.557
TRUE	High	Master Protein	A7VJC2	Heterogeneous nuclear ribonucleoproteins A2/B1 OS=Rattus norvegicus GN=Hnrnpa2b1 PE=1 SV=1	0	FALSE	108.675	39	10	152	10	353	37.5	8.95	621.18	10	cell differentiation;cell organization and biogenesis;metabolic process;regulation of biological process;response to stimulus;transport	chromosome;cytoplasm;extracellular;membrane;nucleus;spliceosomal complex	DNA binding;protein binding;RNA binding	Pf00076, Pf13893, Pf14259	362361		Hnrnpa2b1	4		mRNA processing		1	0	1.186	0.967	1.094	0.968	1.32	1.161	0.984	1.092	0.937	0.789	1.037	0.967	0.967	0.988	1.666	1.064	0.966	1.075	1.012	0.01
TRUE	High	Master Protein	P31000	Vimentin OS=Rattus norvegicus GN=Vim PE=1 SV=2	0	FALSE	108.507	38	16	144	13	466	53.7	5.12	487.64	16	cell differentiation;cell organization and biogenesis;metabolic process;regulation of biological process;response to stimulus	cytoplasm;cytoskeleton;cytosol;membrane;nucleus	protein binding;RNA binding;structural molecule activity	Pf00038, Pf04111, Pf04156, Pf04732, Pf10186	81818		Vim	17	Epstein-Barr virus infection; MicroRNAs in cancer	Striated Muscle Contraction; Alpha6-Beta4 Integrin Signaling Pathway		4	2	0.89	0.994	1.053	0.965	0.532	0.91	1.036	1.089	1.003	0.59	0.877	1.039	1.093	0.936	1.416	0.882	0.998	1.044	0.955	0.01
TRUE	High	Master Protein	P19234	NADH dehydrogenase [ubiquinone] flavoprotein 2, mitochondrial OS=Rattus norvegicus GN=Ndufv2 PE=1 SV=2	0	FALSE	107.971	39	8	184	8	248	27.4	6.68	666.54	8	metabolic process;transport	membrane;mitochondrion	catalytic activity;metal ion binding	Pf01257	81728	ENSRNOG00000042503.2	Ndufv2	9	Metabolic pathways; Huntington's disease; Alzheimer's disease; Parkinson's disease; Oxidative phosphorylation; Non-alcoholic fatty liver disease (NAFLD)	Oxidative phosphorylation; Electron Transport Chain	Complex I biogenesis	13	0	0.968	0.947	1.016	0.977	0.837	0.984	0.971	0.979	0.974	0.824	1.024	0.925	0.985	0.917	0.279	1.031	0.934	0.99	0.935	0.327
TRUE	High	Master Protein	G3V9Y1	Myosin, heavy polypeptide 10, non-muscle, isoform CRA_b OS=Rattus norvegicus GN=Myh10 PE=4 SV=1	0	FALSE	107.958	10	18	104	12	1976	228.9	5.54	323.47	18	cell organization and biogenesis;cell proliferation;cellular component movement;metabolic process;regulation of biological process;transport	cytoplasm;membrane;nucleus	catalytic activity;motor activity;nucleotide binding;protein binding;transporter activity	Pf00063, Pf00769, Pf01496, Pf01576, Pf02736, Pf02841, Pf04111, Pf05622, Pf05667, Pf05911, Pf06637, Pf07888, Pf09726, Pf09731, Pf12128, Pf13094, Pf13514	79433	ENSRNOG00000002886.6	Myh10	10		Regulation of Actin Cytoskeleton	RHO GTPases activate PAKs	5	6	1.04	1.04	0.993	0.921	0.948	0.972	1.082	1.015	0.889	0.35	1.011	1.111	0.995	0.968	0.65	1.005	1.097	0.972	0.95	1.134
TRUE	High	Master Protein	F1MAP9	E3 ubiquitin-protein ligase HUWE1 OS=Rattus norvegicus GN=Huwe1 PE=4 SV=2	0	FALSE	106.779	5	16	123	15	4181	460.2	5.33	442.61	16			catalytic activity	Pf00632, Pf02825, Pf06012, Pf06025, Pf14377								0	1	1.045	1.018	1.079	1.123	1.926	1.077	1.076	0.996	1.128	1.484	1.086	1.028	1.031	1.079	2.085	1.075	0.985	0.98	1.004	0.887
TRUE	High	Master Protein	B4F772	Heat shock 70 kDa protein 4L OS=Rattus norvegicus GN=Hspa4l PE=2 SV=1	0	FALSE	106.386	18	11	91	11	838	94.2	5.69	358.25	11	metabolic process;response to stimulus	cytoplasm;cytosol;nucleus	nucleotide binding	Pf00012	294993		Hspa4l	2	Protein processing in endoplasmic reticulum			1	0	1.08	1.031	1.072	1.063	1.894	1.02	1.018	1.038	1.005	1.812	0.9	0.998	1.08	1.074	0.01	0.951	0.98	1.015	1.102	1.667
TRUE	High	Master Protein	P08461	Dihydrolipoyllysine-residue acetyltransferase component of pyruvate dehydrogenase complex, mitochondrial OS=Rattus norvegicus GN=Dlat PE=1 SV=3	0	FALSE	106.274	19	7	191	7	632	67.1	8.53	778.25	7	metabolic process	mitochondrion;organelle lumen	catalytic activity;nucleotide binding;protein binding	Pf00198, Pf00364, Pf02817	81654	ENSRNOG00000009994.5	Dlat	8	Metabolic pathways; Glycolysis / Gluconeogenesis; Pyruvate metabolism; Citrate cycle (TCA cycle); Carbon metabolism	Glycolysis and Gluconeogenesis; TCA Cycle; Hexoses metabolism in proximal tubules	Glyoxylate metabolism and glycine degradation; Signaling by Retinoic Acid; Regulation of pyruvate dehydrogenase (PDH) complex	18	0	0.925	0.885	0.897	0.938	0.822	0.917	0.848	0.912	0.921	0.74	0.935	0.891	0.945	0.949	2.094	0.968	0.925	0.987	0.966	1.808
TRUE	High	Master Protein	F1LSX8	Plasma membrane calcium-transporting ATPase 4 OS=Rattus norvegicus GN=Atp2b4 PE=3 SV=2	0	FALSE	105.595	13	16	174	1	1203	132.9	6.76	598.89	16			catalytic activity;metal ion binding;nucleotide binding;transporter activity	Pf00122, Pf00689, Pf00690, Pf00702, Pf08282, Pf12424, Pf12710, Pf13246								0	11	0.921	1.174	1.157	1.077	0.01	0.995	1.222	1.113	1.122	0.395	1.025	1.051	1.097	1.164	1.015	1.023	1.159	1.16	1.332	0.01
TRUE	High	Master Protein	Q5XIH7	Prohibitin-2 OS=Rattus norvegicus GN=Phb2 PE=1 SV=1	0	FALSE	103.451	36	11	235	11	299	33.3	9.83	864.34	11	cell organization and biogenesis;metabolic process;regulation of biological process;response to stimulus;transport	cell surface;cytoplasm;membrane;mitochondrion;nucleus	protein binding	Pf01145	114766	ENSRNOG00000012999.7	Phb2	4			Processing of SMDT1	3	0	1.108	1.023	1.003	1.03	1.088	1.119	1.026	1.018	1.049	0.753	1.07	1.02	0.991	0.965	0.656	1.096	1.07	0.994	1.017	0.653
TRUE	High	Master Protein	Q9WV48	SH3 and multiple ankyrin repeat domains protein 1 OS=Rattus norvegicus GN=Shank1 PE=1 SV=1	0	FALSE	103.081	9	11	63	11	2167	226.2	8.34	285.5	11	cell differentiation;cell organization and biogenesis;regulation of biological process;response to stimulus	cytoplasm;cytosol;membrane;nucleus	DNA binding;protein binding;structural molecule activity	Pf00018, Pf00023, Pf00536, Pf00595, Pf02198, Pf07647, Pf07653, Pf12796, Pf13637, Pf13857, Pf14604	78957	ENSRNOG00000019207.8	Shank1	1	Glutamatergic synapse		Neurexins and neuroligins	4	0	1.056	0.908	1.091	0.971	1.4	1.049	0.94	1.044	0.998	0.454	1.013	0.904	0.912	0.909	2.694	0.996	0.916	0.988	1.001	1.941
TRUE	High	Master Protein	Q6AY84	Secernin-1 OS=Rattus norvegicus GN=Scrn1 PE=1 SV=1	0	FALSE	102.133	26	8	99	8	414	46.4	4.84	396.78	8	metabolic process;transport	cytoplasm;membrane;nucleus	catalytic activity	Pf03577	502776	ENSRNOG00000009636.5	Scrn1	4				0	0	0.792	1.174	1.047	0.86	1.288	0.809	1.153	1.085	0.858	1.279	1.018	0.989	0.981	0.973	1.749	0.962	0.952	0.999	0.943	0.01
TRUE	High	Master Protein	H1UBM5	Copine 6 protein OS=Rattus norvegicus GN=Cpne6 PE=2 SV=1	0	FALSE	101.923	36	15	132	14	552	61.2	5.77	496.4	15	response to stimulus	cytoplasm;membrane	protein binding	Pf00092, Pf00168, Pf07002, Pf10138	691478		Cpne6	15				0	1	0.954	0.925	0.974	0.955	0.01	0.951	0.939	0.999	0.979	0.01	0.915	0.962	1.031	1.033	0.01	0.927	1.075	1.078	0.953	0.599
TRUE	High	Master Protein	B2GUZ9	Fam49b protein OS=Rattus norvegicus GN=Fam49b PE=2 SV=1	0	FALSE	101.366	37	8	71	7	324	36.8	6.06	286.07	8	regulation of biological process		protein binding	Pf07159	299909	ENSRNOG00000061246.1	Fam49b	7			Platelet degranulation	4	2	1.111	1.065	1.092	1.04	1.212	1.096	1.087	1.096	0.955	0.648	0.947	1.007	1.062	1.096	1.325	0.992	1.079	1.018	1.114	0.801
TRUE	High	Master Protein	M0R660	Protein RGD1565368 OS=Rattus norvegicus GN=RGD1565368 PE=3 SV=1	0	FALSE	101.319	42	10	214	7	333	35.8	8.25	856.06	10	metabolic process		catalytic activity;nucleotide binding	Pf00044, Pf02800		ENSRNOG00000050630.2	RGD1565368	8				0	4	0.924	0.992	1.054	1.062	0.616	0.923	0.954	1.063	1.054	0.848	0.933	0.982	1.065	1.056	1.17	0.99	0.93	0.998	0.989	0.599
TRUE	High	Master Protein	P06761	78 kDa glucose-regulated protein OS=Rattus norvegicus GN=Hspa5 PE=1 SV=1	0	FALSE	101.24	17	9	180	8	654	72.3	5.16	705.29	9	cell communication;cell death;cell differentiation;cell organization and biogenesis;metabolic process;regulation of biological process;response to stimulus;transport	cell surface;cytoplasm;endoplasmic reticulum;membrane;mitochondrion;nucleus;organelle lumen	catalytic activity;nucleotide binding;protein binding	Pf00012, Pf01968, Pf06723	25617	ENSRNOG00000018294.6	Hspa5	3	Antigen processing and presentation; Thyroid hormone synthesis; Protein processing in endoplasmic reticulum; Prion diseases; Protein export	MAPK signaling pathway		6	0	1.024	1.002	1.045	0.961	1.611	0.96	1.004	1.062	1.014	0.401	1.066	1.041	1.005	0.984	1.41	1.079	1.061	0.979	0.997	1.537
TRUE	High	Master Protein	F1M787	Catenin delta-2 (Fragment) OS=Rattus norvegicus GN=Ctnnd2 PE=4 SV=2	0	FALSE	101.132	20	12	68	11	866	92.5	6.71	329.75	12			protein binding	Pf00514								0	0	0.939	1.058	1.052	0.96	0.01	0.927	1.08	1.055	1.009	0.458	0.951	1.133	1.015	1.165	0.01	0.968	0.996	0.916	0.967	0.01
TRUE	High	Master Protein	F1LNY3	Neural cell adhesion molecule 1 (Fragment) OS=Rattus norvegicus GN=Ncam1 PE=4 SV=1	0	FALSE	101.128	11	8	326	1	847	93.3	4.89	1419.48	8			protein binding	Pf00041, Pf00047, Pf07654, Pf07679, Pf08205, Pf13895, Pf13927								0	0	0.818	1.136	1.126	0.883	0.677	0.869	1.155	1.106	0.906	0.646	0.935	1.085	1.008	0.978	0.01	0.906	1.277	1.046	0.934	0.01
TRUE	High	Master Protein	Q63560	Microtubule-associated protein 6 OS=Rattus norvegicus GN=Map6 PE=1 SV=1	0	FALSE	100.912	23	13	126	13	952	100.4	9.44	422.8	13	cell organization and biogenesis;cellular component movement;regulation of biological process;transport	cytoplasm;cytoskeleton;Golgi	protein binding	Pf05217	29457		Map6	1				0	0	0.984	0.928	0.982	0.913	1.092	1.009	0.962	1.037	0.93	0.596	0.964	0.935	0.98	0.869	0.01	0.994	0.958	1.018	0.902	0.01
TRUE	High	Master Protein	P48721	Stress-70 protein, mitochondrial OS=Rattus norvegicus GN=Hspa9 PE=1 SV=3	0	FALSE	100.121	19	11	107	11	679	73.8	6.3	392.58	11	cell differentiation;cell organization and biogenesis;metabolic process;regulation of biological process;response to stimulus;transport	cytoplasm;mitochondrion;nucleus;organelle lumen	nucleotide binding;protein binding;RNA binding	Pf00012, Pf06723	291671		Hspa9	18				0	0	0.975	0.994	1.015	0.999	0.963	0.928	0.93	1.004	0.96	1.843	1.066	0.941	1.005	1.007	1.187	1.04	0.933	0.987	0.968	0.404
TRUE	High	Master Protein	Q568Z9	Phytanoyl-CoA hydroxylase-interacting protein OS=Rattus norvegicus GN=Phyhip PE=2 SV=1	0	FALSE	99.836	43	12	136	8	330	37.5	7.01	424.8	12			protein binding		290356; 103690056; 108348161	ENSRNOG00000049071.2; ENSRNOG00000010555.4	Phyhip; LOC102551958; NEWGENE_1305790; LOC108348161	15				0	5	0.923	1.028	0.991	0.961	0.452	0.948	1.061	1.005	0.982	0.438	0.959	1.054	1.023	1.013	0.653	0.928	1.042	0.998	1	1.617
TRUE	High	Master Protein	Q5XI34	Protein Ppp2r1a OS=Rattus norvegicus GN=Ppp2r1a PE=2 SV=1	0	FALSE	99.457	21	14	199	14	589	65.3	5.11	722.67	14	cell organization and biogenesis;metabolic process;regulation of biological process	cytosol	catalytic activity;enzyme regulator activity;protein binding	Pf02985, Pf13513, Pf13646	117281	ENSRNOG00000011282.6	Ppp2r1a	1	Adrenergic signaling in cardiomyocytes; Oocyte meiosis; Hepatitis C; Tight junction; Hippo signaling pathway; TGF-beta signaling pathway; mRNA surveillance pathway; Long-term depression; Sphingolipid signaling pathway; AMPK signaling pathway; PI3K-Akt signaling pathway; Chagas disease (American trypanosomiasis); Dopaminergic synapse	Wnt Signaling Pathway and Pluripotency; IL-6 Signaling Pathway; Glycogen Metabolism	Amplification of signal from unattached kinetochores via a MAD2 inhibitory signal; Spry regulation of FGF signaling; AURKA Activation by TPX2; RHO GTPases Activate Formins; Loss of Nlp from mitotic centrosomes; Regulation of PLK1 Activity at G2/M Transition; Recruitment of mitotic centrosome proteins and complexes; Activated TLR4 signalling; ERKs are inactivated; Regulation of TP53 Degradation; N…	116	0	1.046	0.988	1.018	0.982	0.824	1.028	1.013	1.022	0.985	0.811	1.004	1.012	1.055	1.034	0.54	0.989	0.973	1.013	0.987	1.368
TRUE	High	Master Protein	P20651	Serine/threonine-protein phosphatase 2B catalytic subunit beta isoform OS=Rattus norvegicus GN=Ppp3cb PE=1 SV=1	0	FALSE	99.226	19	11	197	7	525	59.1	5.91	650.21	11	cell differentiation;cellular homeostasis;metabolic process;regulation of biological process;response to stimulus;transport	cytosol;membrane	catalytic activity;metal ion binding;protein binding	Pf00149	24675		Ppp3cb	15	Calcium signaling pathway; cGMP-PKG signaling pathway; Glucagon signaling pathway; Natural killer cell mediated cytotoxicity; Axon guidance; Dopaminergic synapse; Oxytocin signaling pathway; Osteoclast differentiation; Oocyte meiosis; Tuberculosis; B cell receptor signaling pathway; Th1 and Th2 cell differentiation; Glutamatergic synapse; MAPK signaling pathway; HTLV-I infection; T cell receptor …	MAPK signaling pathway		24	5	0.954	1.02	0.947	0.992	1.474	0.926	1.058	0.964	0.983	0.574	0.914	0.947	0.946	0.924	0.538	0.864	0.894	0.941	0.87	0.01
TRUE	High	Master Protein	P54311	Guanine nucleotide-binding protein G(I)/G(S)/G(T) subunit beta-1 OS=Rattus norvegicus GN=Gnb1 PE=1 SV=4	0	FALSE	98.985	27	6	142	3	340	37.4	6	579.35	6	cell death;cell organization and biogenesis;cell proliferation;cellular homeostasis;regulation of biological process;response to stimulus	membrane	catalytic activity;protein binding;signal transducer activity	Pf00400	24400	ENSRNOG00000016638.5	Gnb1	5	Alcoholism; Serotonergic synapse; Pathways in cancer; Glutamatergic synapse; Dopaminergic synapse; Phototransduction; PI3K-Akt signaling pathway; Morphine addiction; Ras signaling pathway; Cholinergic synapse; Chemokine signaling pathway; Olfactory transduction; Circadian entrainment; Retrograde endocannabinoid signaling; GABAergic synapse	Estrogen signaling; Myometrial Relaxation and Contraction Pathways; Calcium Regulation in the Cardiac Cell; G Protein Signaling Pathways	Thrombin signalling through proteinase activated receptors (PARs); ADP signalling through P2Y purinoceptor 1; G alpha (z) signalling events; Cooperation of PDCL (PhLP1) and TRiC/CCT in G-protein beta folding; Glucagon-like Peptide-1 (GLP1) regulates insulin secretion; G-protein activation; Activation of the phototransduction cascade; Gastrin-CREB signalling pathway via PKC and MAPK; G beta:gamma …	78	0	0.721	1.05	0.945	0.865	0.01	0.785	1.223	1.05	0.815	0.01	0.89	1.066	1	0.823	1.483	0.854	1.056	0.96	0.825	0.01
TRUE	High	Master Protein	D3ZVQ0	Ubiquitin carboxyl-terminal hydrolase OS=Rattus norvegicus GN=Usp5 PE=3 SV=1	0	FALSE	98.49	16	12	113	12	858	95.7	5.01	444.28	12	metabolic process;regulation of biological process		catalytic activity;metal ion binding;protein binding	Pf00443, Pf00627, Pf02148, Pf13423	297593	ENSRNOG00000015409.5	Usp5	4			Synthesis of active ubiquitin: roles of E1 and E2 enzymes; Ub-specific processing proteases	6	0	1.007	0.969	1.023	0.984	1.189	0.99	0.917	1.045	1.039	1.215	0.968	0.885	1.043	1.021	0.814	0.929	0.904	1.056	0.998	0.98
TRUE	High	Master Protein	P0DJJ3	SH3-containing GRB2-like protein 3-interacting protein 1 OS=Rattus norvegicus GN=Sgip1 PE=1 SV=1	0	FALSE	98.352	12	7	138	7	827	88.5	8.03	647.17	7	cell organization and biogenesis;regulation of biological process;response to stimulus;transport	cytoplasm;membrane	protein binding	Pf00928, Pf10291	313413		Sgip1	5				0	0	0.989	0.909	0.982	0.911	1.104	0.978	0.891	0.999	0.885	1.271	1.02	0.908	1.024	0.898	0.873	1.024	0.903	1.016	0.89	1.072
TRUE	High	Master Protein	Q07439	Heat shock 70 kDa protein 1A/1B OS=Rattus norvegicus GN=Hspa1a PE=2 SV=2	0	FALSE	98.153	17	7	147	4	641	70.1	5.82	658.97	7	cell differentiation;cell organization and biogenesis;defense response;metabolic process;regulation of biological process;response to stimulus	cytoplasm;cytoskeleton;cytosol;membrane;mitochondrion;nucleus	catalytic activity;nucleotide binding;protein binding;RNA binding	Pf00012, Pf06723	294254; 24472; 108348108	ENSRNOG00000050647.2; ENSRNOG00000045654.2	Hspa1b; Hspa1a; LOC108348108	20	Longevity regulating pathway - multiple species; Protein processing in endoplasmic reticulum; Measles; Estrogen signaling pathway; Prion diseases; Epstein-Barr virus infection; Endocytosis; MAPK signaling pathway; Legionellosis; Toxoplasmosis; Antigen processing and presentation; Influenza A; Spliceosome	MAPK signaling pathway; Apoptosis Modulation by HSP70; Cardiovascular Signaling	HSP90 chaperone cycle for steroid hormone receptors (SHR); Neutrophil degranulation; AUF1 (hnRNP D0) binds and destabilizes mRNA; Attenuation phase; Regulation of HSF1-mediated heat shock response	29	0											1.01	1.236	0.851	0.927	0.01	0.973	1.276	1.003	1.093	0.01
TRUE	High	Master Protein	Q5PPJ9	Endophilin-B2 OS=Rattus norvegicus GN=Sh3glb2 PE=2 SV=2	0	FALSE	97.967	25	8	93	8	404	44.8	5.58	372	8		cytoplasm;cytosol	protein binding	Pf03114, Pf14604	311848		Sh3glb2	3	Endocytosis			1	0	1.043	0.908	0.885	0.914	0.578	0.995	0.894	0.95	0.928	0.786	0.908	1.037	1	1.016	0.01	0.956	1.057	0.983	0.953	0.636
TRUE	High	Master Protein	Q6AYH5	Dynactin subunit 2 OS=Rattus norvegicus GN=Dctn2 PE=1 SV=1	0	FALSE	97.961	19	6	134	6	402	44.1	5.26	534.42	6	cell organization and biogenesis;cell proliferation;transport	chromosome;cytoplasm;cytoskeleton;cytosol;membrane	catalytic activity;motor activity;protein binding	Pf04912	299850	ENSRNOG00000025481.4	Dctn2	7	Huntington's disease; Vasopressin-regulated water reabsorption		Regulation of PLK1 Activity at G2/M Transition; HSP90 chaperone cycle for steroid hormone receptors (SHR); AURKA Activation by TPX2; Recruitment of mitotic centrosome proteins and complexes; Loss of Nlp from mitotic centrosomes; Anchoring of the basal body to the plasma membrane; MHC class II antigen presentation; COPI-independent Golgi-to-ER retrograde traffic; Recruitment of NuMA to mitotic cen…	35	0	1.061	1.027	0.915	0.942	1.28	1.015	1.02	1.045	1.065	0.814	1.013	1.024	1.015	1.009	1.153	0.988	1.003	1.002	1.009	2.118
TRUE	High	Master Protein	D4AEN5	Plasma membrane calcium-transporting ATPase 2 OS=Rattus norvegicus GN=Atp2b2 PE=4 SV=2	0	FALSE	97.828	12	18	161	2	1285	141.3	6.99	499.06	18			catalytic activity;metal ion binding;nucleotide binding;transporter activity	Pf00122, Pf00689, Pf00690, Pf00702, Pf08282, Pf12424, Pf12710, Pf13246								0	0											1.242	0.925	1.08	1.067	0.01
TRUE	High	Master Protein	P63086	Mitogen-activated protein kinase 1 OS=Rattus norvegicus GN=Mapk1 PE=1 SV=3	0	FALSE	97.802	29	10	123	7	358	41.2	6.98	471.86	10	cell communication;cell death;cell differentiation;cell proliferation;cellular homeostasis;metabolic process;regulation of biological process;response to stimulus;transport	cytoplasm;cytoskeleton;cytosol;endosome;Golgi;membrane;mitochondrion;nucleus	catalytic activity;nucleotide binding;protein binding;signal transducer activity	Pf00069, Pf01636, Pf07714	116590	ENSRNOG00000001849.7	Mapk1	11	ErbB signaling pathway; Focal adhesion; Choline metabolism in cancer; TGF-beta signaling pathway; Proteoglycans in cancer; Thyroid hormone signaling pathway; GnRH signaling pathway; Glioma; T cell receptor signaling pathway; PI3K-Akt signaling pathway; TNF signaling pathway; Th1 and Th2 cell differentiation; Apoptosis; cAMP signaling pathway; Regulation of actin cytoskeleton; Thyroid cancer; Fc e…	EBV LMP1 signaling; Estrogen signaling; Hypothetical Network for Drug Addiction; EPO Receptor Signaling; ErbB signaling pathway; Toll-like receptor signaling pathway; Signal Transduction of S1P; IL-6 Signaling Pathway; Kit Receptor Signaling Pathway; TNF-alpha and mucus production in lung epythelium; Focal Adhesion; VEGFR-3 signaling; VEGF-receptor Signal Transduction; Genetic alterations of lung…	Golgi Cisternae Pericentriolar Stack Reorganization; Oxidative Stress Induced Senescence; Senescence-Associated Secretory Phenotype (SASP); Spry regulation of FGF signaling; Oncogene Induced Senescence; Neutrophil degranulation; Thrombin signalling through proteinase activated receptors (PARs); RHO GTPases Activate WASPs and WAVEs; RSK activation; Negative feedback regulation of MAPK pathway; Reg…	219	3	0.971	1.018	0.972	0.95	1.254	0.952	1.182	1.003	1.045	0.01	0.938	1.134	1.086	0.971	0.526	0.856	1.147	1.078	0.928	1.019
TRUE	High	Master Protein	P11506	Plasma membrane calcium-transporting ATPase 2 OS=Rattus norvegicus GN=Atp2b2 PE=2 SV=2	0	FALSE	97.651	14	19	174	1	1243	136.7	5.97	519.78	19	cell differentiation;cell organization and biogenesis;cellular homeostasis;metabolic process;regulation of biological process;response to stimulus;transport	cytoplasm;endoplasmic reticulum;membrane	catalytic activity;metal ion binding;nucleotide binding;protein binding;transporter activity	Pf00122, Pf00689, Pf00690, Pf00702, Pf08282, Pf12424, Pf12710, Pf13246	24215		Atp2b2	4	cAMP signaling pathway; Salivary secretion; Pancreatic secretion; cGMP-PKG signaling pathway; Calcium signaling pathway; Adrenergic signaling in cardiomyocytes	Calcium Regulation in the Cardiac Cell	Ion homeostasis; Ion transport by P-type ATPases; Reduction of cytosolic Ca++ levels	17	20	0.948	1.263	1.058	0.904	0.291	0.906	1.235	1.089	0.923	0.256	0.917	1.196	1.05	0.927	0.433	0.95	1.14	1.031	0.911	0.01
TRUE	High	Master Protein	P05197	Elongation factor 2 OS=Rattus norvegicus GN=Eef2 PE=1 SV=4	0	FALSE	97.437	16	13	149	12	858	95.2	6.83	501.51	13	cell differentiation;cell proliferation;metabolic process;regulation of biological process;response to stimulus	cytoplasm;cytosol;membrane;nucleus;ribosome	catalytic activity;nucleotide binding;protein binding;RNA binding	Pf00009, Pf00679, Pf03144, Pf03764, Pf14492	29565	ENSRNOG00000020266.5	Eef2	7	Oxytocin signaling pathway; AMPK signaling pathway	Translation Factors	Synthesis of diphthamide-EEF2; Protein methylation; Peptide chain elongation; Neutrophil degranulation	14	1	0.998	1.116	1.067	1.061	0.67	0.968	1.089	1.091	1.053	0.436	1.002	1.108	1.08	1.017	0.707	1.082	1.112	1.102	1.045	1.124
TRUE	High	Master Protein	P25809	Creatine kinase U-type, mitochondrial OS=Rattus norvegicus GN=Ckmt1 PE=1 SV=1	0	FALSE	97.385	29	12	240	1	418	47	8.48	791.22	12	metabolic process;regulation of biological process	membrane;mitochondrion	catalytic activity;nucleotide binding;protein binding	Pf00217, Pf02807	29593		Ckmt1b; Ckmt1	3				0	0
TRUE	High	Master Protein	Q5XIM9	T-complex protein 1 subunit beta OS=Rattus norvegicus GN=Cct2 PE=1 SV=3	0	FALSE	97.204	25	9	119	9	535	57.4	6.46	423.87	9	cell organization and biogenesis;metabolic process;regulation of biological process;transport	cytoplasm;cytosol	nucleotide binding;protein binding	Pf00118	299809	ENSRNOG00000021317.5	Cct2	7			Association of TriC/CCT with target proteins during biosynthesis; Neutrophil degranulation; Cooperation of PDCL (PhLP1) and TRiC/CCT in G-protein beta folding	8	0	1.122	1.08	1.025	1.071	0.512	1.129	1.028	0.988	0.968	0.484	1.012	1.066	1.045	0.969	0.528	1.021	1.02	1.028	0.957	0.01
TRUE	High	Master Protein	Q3T1H3	Ncam1 protein OS=Rattus norvegicus GN=Ncam1 PE=2 SV=1	0	FALSE	97.012	10	8	321	1	849	93.5	4.93	1399.24	8	cell organization and biogenesis;cellular component movement;regulation of biological process;response to stimulus	cell surface;cytosol;membrane	protein binding	Pf00041, Pf00047, Pf07654, Pf07679, Pf08205, Pf13895, Pf13927	24586		Ncam1	8				0	7	0.926	0.992	1.041	0.967	0.96	0.926	0.984	1.013	0.946	0.928	0.983	0.984	1.026	1.081	1.19	0.964	0.941	1.003	1.058	0.779
TRUE	High	Master Protein	P13233	2',3'-cyclic-nucleotide 3'-phosphodiesterase OS=Rattus norvegicus GN=Cnp PE=1 SV=2	0	FALSE	96.834	16	10	158	9	420	47.2	8.9	546.96	10	cell differentiation;cell organization and biogenesis;metabolic process;response to stimulus	cytoplasm;membrane	catalytic activity;nucleotide binding;RNA binding	Pf01591, Pf05881, Pf06414, Pf08302, Pf13207, Pf13238, Pf13401, Pf13671	25275	ENSRNOG00000017496.4	Cnp	10				0	1	0.851	0.791	0.785	0.801	0.23	0.85	0.878	0.81	0.792	0.598	0.899	0.86	0.801	0.821	0.786	0.91	0.833	0.792	0.773	0.01
TRUE	High	Master Protein	P62260	14-3-3 protein epsilon OS=Rattus norvegicus GN=Ywhae PE=1 SV=1	0	FALSE	96.423	36	10	464	7	255	29.2	4.74	1660.91	10	cellular component movement;cellular homeostasis;metabolic process;regulation of biological process;response to stimulus;transport	cytoplasm;cytosol;membrane;mitochondrion;nucleus	enzyme regulator activity;protein binding;RNA binding	Pf00244	29753	ENSRNOG00000005290.5	Ywhae	10	Viral carcinogenesis; Neurotrophin signaling pathway; Epstein-Barr virus infection; PI3K-Akt signaling pathway; Cell cycle; Oocyte meiosis; Hippo signaling pathway	Myometrial Relaxation and Contraction Pathways; Calcium Regulation in the Cardiac Cell; TNF-alpha NF-kB Signaling Pathway; Alpha6-Beta4 Integrin Signaling Pathway	Chk1/Chk2(Cds1) mediated inactivation of Cyclin B:Cdk1 complex; AURKA Activation by TPX2; Signaling by Hippo; Loss of Nlp from mitotic centrosomes; NADE modulates death signalling; HSF1 activation; RHO GTPases activate PKNs; Translocation of GLUT4 to the plasma membrane; Signalling by NGF; Regulation of HSF1-mediated heat shock response; Regulation of PLK1 Activity at G2/M Transition; RAB GEFs ex…	61	0	0.931	1.03	1.066	1.027	0.963	0.941	1.038	1.095	0.993	1.285	0.985	1.014	0.991	1.07	0.624	0.987	0.991	0.985	1.071	1.2
TRUE	High	Master Protein	Q5M964	Fumarate hydratase 1 OS=Rattus norvegicus GN=Fh PE=2 SV=1	0	FALSE	95.795	20	7	87	7	507	54.4	8.73	449.31	7	metabolic process	mitochondrion	catalytic activity	Pf00206, Pf10415	24368	ENSRNOG00000003653.5	Fh	13	Metabolic pathways; Pathways in cancer; Renal cell carcinoma; Carbon metabolism; Pyruvate metabolism; Citrate cycle (TCA cycle)	TCA Cycle	Citric acid cycle (TCA cycle)	11	0	1.038	1.004	1.058	1.26	0.922	1.046	0.984	1.047	1.185	0.588	0.974	0.963	1.011	1.164	0.585	0.977	0.948	0.973	1.053	1.918
TRUE	High	Master Protein	Q4V7D2	Protein rogdi homolog OS=Rattus norvegicus GN=Rogdi PE=2 SV=1	0	FALSE	94.305	31	6	87	6	287	32.2	8.18	390.18	6	cell differentiation;regulation of biological process	nucleus		Pf10259	287061	ENSRNOG00000003125.5	Rogdi	10				0	0	1.05	1.059	0.955	1.022	1.884	1.005	1.049	0.916	1.082	2.254	1.016	1.133	1.001	1.052	1.992	1.054	1.137	0.996	1.109	1.059
TRUE	High	Master Protein	Q09073	ADP/ATP translocase 2 OS=Rattus norvegicus GN=Slc25a5 PE=1 SV=3	0	FALSE	94.221	35	9	165	2	298	32.9	9.73	532.83	9	cell organization and biogenesis;regulation of biological process;transport	membrane;mitochondrion;nucleus	protein binding;RNA binding;transporter activity	Pf00153	25176	ENSRNOG00000039980.4	Slc25a5	X	cGMP-PKG signaling pathway; Parkinson's disease; Huntington's disease; HTLV-I infection; Calcium signaling pathway	Electron Transport Chain	Regulation of insulin secretion	9	0	1.031	0.794	0.974	1.088	1.128	1.032	0.822	1.01	1.074	1.047	1.139	0.818	0.949	0.991	0.499	1.12	0.761	0.974	1.027	0.73
TRUE	High	Master Protein	F1LLX6	Calcium-dependent secretion activator 1 OS=Rattus norvegicus GN=Cadps PE=4 SV=2	0	FALSE	94.021	13	11	110	2	1148	129.6	5.92	443.38	11				Pf00169, Pf06292								0	10	1.036	1.02	0.975	0.983	0.823	1.041	1.011	1.009	1.081	1.017	1.073	1.036	1.01	0.965	1.018	1.055	1.047	1.034	0.978	1.4
TRUE	High	Master Protein	Q06647	ATP synthase subunit O, mitochondrial OS=Rattus norvegicus GN=Atp5o PE=1 SV=1	0	FALSE	93.601	29	4	162	4	213	23.4	10.02	699.68	4	metabolic process;transport	membrane;mitochondrion;nucleus	catalytic activity;protein binding;transporter activity	Pf00213	192241	ENSRNOG00000001991.7	Atp5o	11	Huntington's disease; Metabolic pathways; Alzheimer's disease; Parkinson's disease; Oxidative phosphorylation	Oxidative phosphorylation; Electron Transport Chain	Formation of ATP by chemiosmotic coupling; Cristae formation	14	0	1.066	0.98	0.984	1.019	1.347	1.05	1.023	1.015	1.04	1.168	1.056	0.962	0.959	1.059	0.886	1.018	0.98	0.945	1.163	1.039
TRUE	High	Master Protein	P50399	Rab GDP dissociation inhibitor beta OS=Rattus norvegicus GN=Gdi2 PE=1 SV=2	0	FALSE	92.932	27	11	105	6	445	50.5	6.25	394.48	11	metabolic process;regulation of biological process;response to stimulus;transport	cytoplasm;cytosol;Golgi;membrane	catalytic activity;enzyme regulator activity;protein binding;RNA binding	Pf00996	29662	ENSRNOG00000018091.6	Gdi2	17			Rho GTPase cycle; RAB GEFs exchange GTP for GDP on RABs; Neutrophil degranulation	10	0	0.959	0.979	0.999	0.972	0.849	1.07	1.007	0.987	1.034	0.717	1.163	1.005	1.009	1.031	0.01	1.09	1.12	1.056	0.954	0.01
TRUE	High	Master Protein	D3ZNN0	Protein Sbf1 OS=Rattus norvegicus GN=Sbf1 PE=4 SV=2	0	FALSE	92.784	14	22	83	21	1867	208.5	7.08	261.72	22	regulation of biological process		enzyme regulator activity	Pf00169, Pf02141, Pf03455, Pf03456, Pf06602, Pf08616, Pf12335, Pf14593, Pf15413	300147		Sbf1	7				0	1	1.005	1.018	0.953	0.975	0.859	1.102	0.955	0.89	0.801	1.112	1.066	1.066	1.045	1.112	1.176	1.096	1.028	1.02	1.033	0.811
TRUE	High	Master Protein	F1LMC3	Calcium/calmodulin-dependent protein kinase type II subunit gamma (Fragment) OS=Rattus norvegicus GN=Camk2g PE=2 SV=2	0	FALSE	92.49	30	13	165	5	506	56.6	8.13	512.35	13	metabolic process		catalytic activity;nucleotide binding;protein binding	Pf00069, Pf07714, Pf08332, Pf12680, Pf13474, Pf14534								0	0	1.011	0.903	0.907	0.919	1.138	1.052	0.938	0.979	0.935	1.278	0.967	0.902	0.911	0.794	1.64	0.988	0.984	0.968	0.86	0.01
TRUE	High	Master Protein	P14659	Heat shock-related 70 kDa protein 2 OS=Rattus norvegicus GN=Hspa2 PE=1 SV=2	0	FALSE	92.277	10	6	182	1	633	69.6	5.67	634.57	6	cell differentiation;cell organization and biogenesis;development;metabolic process;regulation of biological process;response to stimulus	cell surface;cytoplasm;cytoskeleton;cytosol;membrane;mitochondrion;nucleus	nucleotide binding;protein binding	Pf00012, Pf06723	60460	ENSRNOG00000006472.5	Hspa2	6	MAPK signaling pathway; Antigen processing and presentation; Measles; Longevity regulating pathway - multiple species; Legionellosis; Epstein-Barr virus infection; Influenza A; Estrogen signaling pathway; Protein processing in endoplasmic reticulum; Toxoplasmosis; Spliceosome; Endocytosis			12	0											0.958	1.017	0.946	1.036	1.592	0.973	1.015	0.97	1.07	2.187
TRUE	High	Master Protein	E9PSX6	Sarcoplasmic/endoplasmic reticulum calcium ATPase 2 OS=Rattus norvegicus GN=Atp2a2 PE=3 SV=2	0	FALSE	92.11	15	15	96	8	999	110.2	5.58	304.38	15			metal ion binding;nucleotide binding	Pf00122, Pf00689, Pf00690, Pf00702, Pf08282, Pf12710, Pf13246								0	6	0.973	1.057	1.042	0.92	0.882	0.95	1.043	1.056	0.909	1.347	0.904	0.97	0.988	0.878	1.385	0.886	0.964	1.006	0.917	2.097
TRUE	High	Master Protein	A2VCW8	Septin 7 OS=Rattus norvegicus GN=Sept7 PE=2 SV=1	0	FALSE	91.81	32	10	133	10	437	50.6	8.57	691.61	10	cell differentiation;cell division;cell growth;cell organization and biogenesis;regulation of biological process	cytoskeleton;membrane;nucleus	nucleotide binding;protein binding	Pf00735, Pf01926, Pf05368	64551		Sept7	8				0	0	0.957	0.965	1.099	1.141	1.509	0.946	0.94	1.063	1.127	0.936	0.905	0.935	1.121	1.183	1.155	0.926	0.95	1.136	1.129	0.758
TRUE	High	Master Protein	Q7TPB1	T-complex protein 1 subunit delta OS=Rattus norvegicus GN=Cct4 PE=1 SV=3	0	FALSE	91.545	27	14	124	13	539	58.1	8.02	419.63	14	metabolic process;regulation of biological process;transport	cytoplasm;cytoskeleton;cytosol	nucleotide binding;protein binding;RNA binding	Pf00118	29374	ENSRNOG00000009642.3	Cct4	14			Association of TriC/CCT with target proteins during biosynthesis; Cooperation of PDCL (PhLP1) and TRiC/CCT in G-protein beta folding	5	1	1.019	1.046	1.037	0.992	0.697	1.062	1.102	1.04	0.976	0.749	0.945	1.109	1.038	0.97	1.39	0.996	1.085	1.061	1.013	0.88
TRUE	High	Master Protein	P10687	1-phosphatidylinositol 4,5-bisphosphate phosphodiesterase beta-1 OS=Rattus norvegicus GN=Plcb1 PE=1 SV=1	0	FALSE	91.283	10	10	73	9	1216	138.3	6.18	294.49	10	cell differentiation;metabolic process;regulation of biological process;response to stimulus	cytoplasm;cytosol;membrane;nucleus	catalytic activity;enzyme regulator activity;metal ion binding;protein binding;signal transducer activity	Pf00168, Pf00387, Pf00388, Pf08703, Pf09279	24654		Plcb1	3	AGE-RAGE signaling pathway in diabetic complications; Circadian entrainment; Wnt signaling pathway; Adrenergic signaling in cardiomyocytes; Platelet activation; cGMP-PKG signaling pathway; GnRH signaling pathway; Renin secretion; Insulin secretion; Rap1 signaling pathway; Vascular smooth muscle contraction; NOD-like receptor signaling pathway; Gap junction; Melanogenesis; Dopaminergic synapse; Ca…	Signal Transduction of S1P; CFTR activity in the plasma membrane; IL-2 Signaling Pathway		48	1	1.119	0.938	0.991	0.773	0.01	1.139	0.999	0.867	0.683	0.01	0.955	0.975	0.956	0.894	0.752	0.899	0.913	0.999	0.906	1.465
TRUE	High	Master Protein	D3ZPC4	Neural cell adhesion molecule L1 OS=Rattus norvegicus GN=L1cam PE=4 SV=2	0	FALSE	90.427	11	10	113	10	1255	140.3	5.78	457.99	10	cell differentiation;cell organization and biogenesis;cellular component movement;regulation of biological process;response to stimulus	cell surface;endosome;membrane	protein binding	Pf00041, Pf00047, Pf07679, Pf07686, Pf13882, Pf13895, Pf13927	50687	ENSRNOG00000061230.1	L1cam	X			Signal transduction by L1; Interaction between L1 and Ankyrins; Recycling pathway of L1; Basigin interactions	9	0	0.993	1.079	1.03	1.067	0.459	0.995	1.091	0.995	1.045	0.379	0.968	1.021	1.053	1.055	0.592	0.981	1.044	1.021	1.048	1.12
TRUE	High	Master Protein	Q9WU82	Catenin beta-1 OS=Rattus norvegicus GN=Ctnnb1 PE=1 SV=1	0	FALSE	89.971	22	14	99	12	781	85.4	5.86	366.15	14	cell communication;cell differentiation;cell growth;cell organization and biogenesis;cell proliferation;cellular component movement;metabolic process;regulation of biological process;response to stimulus;transport	cytoplasm;cytoskeleton;cytosol;membrane;nucleus	DNA binding;protein binding;signal transducer activity	Pf00514	84353		Ctnnb1	8	Adherens junction; Tight junction; Thyroid hormone signaling pathway; Melanogenesis; Bacterial invasion of epithelial cells; Rap1 signaling pathway; Breast cancer; HTLV-I infection; Thyroid cancer; Signaling pathways regulating pluripotency of stem cells; Proteoglycans in cancer; Prostate cancer; Hippo signaling pathway; Leukocyte transendothelial migration; Focal adhesion; Wnt signaling pathway;…	Wnt Signaling Pathway and Pluripotency; Adipogenesis; Focal Adhesion; Wnt myofibroblastic activation of Hepatic Stellate Cells; Wnt Signaling Pathway NetPath; Id Signaling Pathway; IL-5 Signaling Pathway; TGF Beta Signaling Pathway; Wnt Signaling Pathway		30	2	1.009	0.952	1.071	0.989	1.191	1.018	0.923	1.08	0.968	0.721	0.984	1.043	1.088	1.191	0.927	1.014	1.053	1.075	1.151	1.069
TRUE	High	Master Protein	F1LTA7	Protein LOC100909504 (Fragment) OS=Rattus norvegicus GN=LOC100909504 PE=4 SV=2	0	FALSE	89.582	25	8	125	1	368	42.4	5.26	537.15	8	metabolic process;response to stimulus		nucleotide binding;protein binding	Pf00183								0	0
TRUE	High	Master Protein	Q6PAH0	Apolipoprotein E OS=Rattus norvegicus GN=Apoe PE=2 SV=1	0	FALSE	89.437	41	15	114	15	312	35.7	5.27	357.68	15	cell differentiation;cell organization and biogenesis;cellular homeostasis;metabolic process;regulation of biological process;response to stimulus;transport	cell surface;cytoplasm;endoplasmic reticulum;endosome;extracellular;Golgi;membrane;nucleus;vacuole	antioxidant activity;catalytic activity;enzyme regulator activity;metal ion binding;protein binding;transporter activity	Pf01442, Pf10186	25728		Apoe	1		Statin Pathway		1	0	0.884	0.996	1.019	0.929	1.437	0.89	1.06	1.031	1.026	0.902	0.907	1.03	1.01	1.041	0.639	0.881	1.049	0.99	0.97	0.608
TRUE	High	Master Protein	Q9Z2L0	Voltage-dependent anion-selective channel protein 1 OS=Rattus norvegicus GN=Vdac1 PE=1 SV=4	0	FALSE	88.974	31	7	93	7	283	30.7	8.54	529.79	7	cell communication;cell death;cell differentiation;defense response;regulation of biological process;response to stimulus;transport	membrane;mitochondrion;nucleus	nucleotide binding;protein binding;transporter activity	Pf01459	83529	ENSRNOG00000006375.6	Vdac1	10	Huntington's disease; Influenza A; HTLV-I infection; NOD-like receptor signaling pathway; cGMP-PKG signaling pathway; Parkinson's disease; Calcium signaling pathway		Pink/Parkin Mediated Mitophagy	9	0	1.158	0.918	0.964	1.27	1.707	1.144	0.923	0.977	1.258	2.129	1.194	0.896	0.984	1.218	2.58	1.173	0.939	1.006	1.158	1.454
TRUE	High	Master Protein	Q8VBU2	Protein NDRG2 OS=Rattus norvegicus GN=Ndrg2 PE=1 SV=1	0	FALSE	88.567	18	7	137	7	371	40.8	5.3	580.6	7	cell differentiation;development;regulation of biological process;response to stimulus	cytoplasm;Golgi;nucleus		Pf00561, Pf03096, Pf12697	171114		Ndrg2	15				0	0	1.137	1.051	1.092	1.064	0.81	1.205	1.044	1.074	1.099	1.135	1.084	1.242	1.004	0.939	0.483	1.057	1.192	1.046	1.036	0.667
TRUE	High	Master Protein	P63102	14-3-3 protein zeta/delta OS=Rattus norvegicus GN=Ywhaz PE=1 SV=1	0	FALSE	88.25	37	11	337	3	245	27.8	4.79	1044.49	11	cell organization and biogenesis;regulation of biological process;response to stimulus;transport	cytoplasm;mitochondrion;nucleus;vacuole	protein binding;RNA binding	Pf00244	25578	ENSRNOG00000008195.6	Ywhaz	7	Viral carcinogenesis; Hepatitis B; Epstein-Barr virus infection; PI3K-Akt signaling pathway; Cell cycle; Oocyte meiosis; Hippo signaling pathway	Myometrial Relaxation and Contraction Pathways; IL-3 Signaling Pathway; Calcium Regulation in the Cardiac Cell; IL-5 Signaling Pathway; TNF-alpha NF-kB Signaling Pathway; Alpha6-Beta4 Integrin Signaling Pathway	Chk1/Chk2(Cds1) mediated inactivation of Cyclin B:Cdk1 complex; KSRP (KHSRP) binds and destabilizes mRNA; TP53 Regulates Metabolic Genes; Deactivation of the beta-catenin transactivating complex; RHO GTPases activate PKNs; Rap1 signalling; Translocation of GLUT4 to the plasma membrane; Interleukin-3, 5 and GM-CSF signaling; GP1b-IX-V activation signalling; Activation of BAD and translocation to m…	50	10	0.933	0.93	1.082	1.025	0.838	0.923	0.984	1.134	1.002	0.534	0.983	0.915	1.119	1.035	1.101	0.955	0.941	1.081	0.99	0.732
TRUE	High	Master Protein	Q6P502	T-complex protein 1 subunit gamma OS=Rattus norvegicus GN=Cct3 PE=1 SV=1	0	FALSE	88.079	30	17	154	17	545	60.6	6.64	485.96	17	cell organization and biogenesis;metabolic process;regulation of biological process;transport	cytoplasm;cytosol;membrane	nucleotide binding;protein binding;RNA binding	Pf00118	295230	ENSRNOG00000019090.6	Cct3	2			Association of TriC/CCT with target proteins during biosynthesis; Cooperation of PDCL (PhLP1) and TRiC/CCT in G-protein beta folding	5	0	0.94	1.079	1.028	0.983	1.712	0.998	1.117	1.074	1.125	0.982	0.995	1.069	1.008	1.054	0.637	1.041	1.061	0.988	1.013	0.362
TRUE	High	Master Protein	P97536	Cullin-associated NEDD8-dissociated protein 1 OS=Rattus norvegicus GN=Cand1 PE=1 SV=1	0	FALSE	87.881	11	13	110	13	1230	136.3	5.78	365.62	13	cell differentiation;cell organization and biogenesis;metabolic process;regulation of biological process	cytoplasm;cytosol;Golgi;membrane;nucleus	protein binding	Pf08623, Pf12755, Pf13513	117152	ENSRNOG00000007834.5	Cand1	7			Iron uptake and transport; Neddylation; Neutrophil degranulation	8	0	0.947	1.086	1.067	1.103	1.601	0.91	1.111	1.08	1.037	1.72	0.964	1.068	0.985	1.127	0.454	0.954	1.148	1.014	1.06	0.852
TRUE	High	Master Protein	P68255	14-3-3 protein theta OS=Rattus norvegicus GN=Ywhaq PE=1 SV=1	0	FALSE	87.719	39	9	284	5	245	27.8	4.78	866.98	9	regulation of biological process;response to stimulus;transport	cytoplasm;membrane	protein binding	Pf00244	25577	ENSRNOG00000051650.1	Ywhaq	6	PI3K-Akt signaling pathway; Oocyte meiosis; Hepatitis B; Hippo signaling pathway; Cell cycle; Epstein-Barr virus infection; Viral carcinogenesis	Myometrial Relaxation and Contraction Pathways; IL-3 Signaling Pathway; Calcium Regulation in the Cardiac Cell; TNF-alpha NF-kB Signaling Pathway; Alpha6-Beta4 Integrin Signaling Pathway	TP53 Regulates Metabolic Genes; Chk1/Chk2(Cds1) mediated inactivation of Cyclin B:Cdk1 complex; RHO GTPases activate PKNs; Translocation of GLUT4 to the plasma membrane; Activation of BAD and translocation to mitochondria	34	0	0.726	1.271	1.073	0.727	0.01	0.881	1.157	1.021	0.971	1.152	0.767	1.094	0.968	0.795	1.381	0.905	1.077	1.051	0.922	3.231
TRUE	High	Master Protein	P00507	Aspartate aminotransferase, mitochondrial OS=Rattus norvegicus GN=Got2 PE=1 SV=2	0	FALSE	87.519	23	9	268	5	430	47.3	9	958.09	9	metabolic process;response to stimulus;transport	cell surface;membrane;mitochondrion;organelle lumen	catalytic activity;protein binding;RNA binding	Pf00155	25721	ENSRNOG00000011782.6	Got2	19	2-Oxocarboxylic acid metabolism; Phenylalanine metabolism; Biosynthesis of amino acids; Arginine and proline metabolism; Arginine biosynthesis; Metabolic pathways; Fat digestion and absorption; Carbon metabolism; Phenylalanine, tyrosine and tryptophan biosynthesis; Alanine, aspartate and glutamate metabolism; Tyrosine metabolism; Cysteine and methionine metabolism	Alanine and aspartate metabolism; Glycolysis and Gluconeogenesis; Hexoses metabolism in proximal tubules		15	5	1	0.939	0.995	1.028	1.441	0.995	0.99	1.004	1.073	1.375	0.998	0.956	1.014	1.048	0.01	1.018	0.962	1.013	1.044	0.503
TRUE	High	Master Protein	Q5HZV9	Protein phosphatase 1 regulatory subunit 7 OS=Rattus norvegicus GN=Ppp1r7 PE=1 SV=1	0	FALSE	86.83	27	8	71	8	360	41.3	4.92	302.12	8	regulation of biological process	chromosome;nucleus	protein binding	Pf12799, Pf13855, Pf14580	301618		Ppp1r7	9				0	0	1.043	1.042	1.012	0.955	1.186	1.128	1.092	1.029	0.993	1.09	0.964	1.016	1.023	0.931	1.129	0.996	1	0.996	1.002	0.01
TRUE	High	Master Protein	P84092	AP-2 complex subunit mu OS=Rattus norvegicus GN=Ap2m1 PE=1 SV=1	0	FALSE	86.337	23	11	214	11	435	49.6	9.54	765.33	11	cell organization and biogenesis;metabolic process;regulation of biological process;response to stimulus;transport	membrane;mitochondrion	protein binding	Pf00928	116563	ENSRNOG00000001709.7	Ap2m1	11	Endocytosis; Endocrine and other factor-regulated calcium reabsorption; Huntington's disease; Synaptic vesicle cycle		Formation of annular gap junctions; Trafficking of GluR2-containing AMPA receptors; Recycling pathway of L1; Retrograde neurotrophin signalling; WNT5A-dependent internalization of FZD4; MHC class II antigen presentation; LDL clearance; Cargo recognition for clathrin-mediated endocytosis; WNT5A-dependent internalization of FZD2, FZD5 and ROR2; VLDLR internalisation and degradation	40	0	0.919	1.092	1.017	0.941	0.485	0.905	1.067	1.03	0.926	0.66	0.948	1.038	0.999	0.916	1.462	0.952	1.041	1.006	1.025	1.189
TRUE	High	Master Protein	Q1WIM1	Cell adhesion molecule 4 OS=Rattus norvegicus GN=Cadm4 PE=1 SV=1	0	FALSE	86.034	27	8	105	8	388	42.8	6.3	466.32	8		membrane	protein binding;receptor activity	Pf00047, Pf02124, Pf07679, Pf07686, Pf08205, Pf13895, Pf13927	365216		Cadm4	1				0	0	0.943	1.035	1.03	1.043	0.86	0.969	1.059	1.065	0.973	1.283	1.002	0.954	1.058	1.027	1.71	0.993	1.052	1.033	1.029	0.815
TRUE	High	Master Protein	P15791	Calcium/calmodulin-dependent protein kinase type II subunit delta OS=Rattus norvegicus GN=Camk2d PE=1 SV=1	0	FALSE	85.701	29	11	269	5	533	60	7.27	818.54	11	cell growth;cell organization and biogenesis;cellular component movement;cellular homeostasis;metabolic process;regulation of biological process;response to stimulus;transport	cytoplasm;cytosol;endoplasmic reticulum;membrane;nucleus	catalytic activity;nucleotide binding;protein binding	Pf00069, Pf07714, Pf08332, Pf12680, Pf13474, Pf14534	24246	ENSRNOG00000011589.8	Camk2d	2	Oocyte meiosis; cAMP signaling pathway; Dopaminergic synapse; Calcium signaling pathway; Amphetamine addiction; Glucagon signaling pathway; Olfactory transduction; Axon guidance; Insulin secretion; GnRH signaling pathway; Circadian entrainment; HIF-1 signaling pathway; Adrenergic signaling in cardiomyocytes; Gastric acid secretion; Cholinergic synapse; ErbB signaling pathway; Aldosterone synthesi…	Myometrial Relaxation and Contraction Pathways; PKA-HCG-Glycogen Syntase; Calcium Regulation in the Cardiac Cell; Wnt Signaling Pathway NetPath		30	0	0.707	1.013	0.834	0.72	0.01	0.792	1.006	0.747	0.804	0.01	0.793	1.419	1.165	0.839	0.01
TRUE	High	Master Protein	Q5RJQ4	NAD-dependent protein deacetylase sirtuin-2 OS=Rattus norvegicus GN=Sirt2 PE=1 SV=1	0	FALSE	85.579	25	8	82	8	350	39.3	7.08	351.74	8	cell communication;cell differentiation;cell division;cell organization and biogenesis;metabolic process;regulation of biological process;response to stimulus	chromosome;cytoplasm;cytoskeleton;cytosol;membrane;mitochondrion;nucleus	catalytic activity;metal ion binding;nucleotide binding;protein binding	Pf02146	361532	ENSRNOG00000020102.6	Sirt2	1				0	0	1.005	0.767	0.819	0.743	0.69	1.018	0.808	0.839	0.764	0.6	0.905	0.734	0.745	0.716	0.576	0.936	0.742	0.783	0.734	0.444
TRUE	High	Master Protein	Q9Z0W5	Protein kinase C and casein kinase substrate in neurons protein 1 OS=Rattus norvegicus GN=Pacsin1 PE=1 SV=1	0	FALSE	85.429	22	9	104	7	441	50.4	5.24	399.85	9	cell organization and biogenesis;regulation of biological process;transport	cytoplasm;cytosol;endosome;membrane	protein binding	Pf00018, Pf00611, Pf07653, Pf14604	29704		Pacsin1	20				0	2	0.634	0.85	0.823	0.686	0.474	0.668	0.972	0.898	0.887	0.01	0.77	0.999	1.008	0.848	0.01	0.768	0.989	0.957	0.912	0.01
TRUE	High	Master Protein	Q8VD52	Pyridoxal phosphate phosphatase OS=Rattus norvegicus GN=Pdxp PE=1 SV=2	0	FALSE	85.361	47	13	161	13	309	33.1	5.69	590.96	13	cell organization and biogenesis;metabolic process;regulation of biological process;response to stimulus	cytoplasm;cytoskeleton;cytosol;membrane	catalytic activity;metal ion binding;protein binding	Pf00702, Pf13242, Pf13344, Pf13419	727679		Pdxp	7				0	0	0.985	1.047	1.042	1.068	1.105	1.02	1.088	1.072	1.127	1.135	0.963	0.997	1.003	1.003	0.67	0.992	0.99	0.986	1.021	0.83
TRUE	High	Master Protein	P38983	40S ribosomal protein SA OS=Rattus norvegicus GN=Rpsa PE=1 SV=3	0	FALSE	85.125	32	8	105	8	295	32.8	4.87	468.86	8	cell differentiation;cell organization and biogenesis;metabolic process;transport	cytoplasm;cytosol;membrane;nucleus;ribosome	protein binding;receptor activity;RNA binding;structural molecule activity	Pf00318	29236	ENSRNOG00000018645.5	Rpsa	8	Ribosome	Cytoplasmic Ribosomal Proteins	SRP-dependent cotranslational protein targeting to membrane; Formation of a pool of free 40S subunits; Translation initiation complex formation; Major pathway of rRNA processing in the nucleolus and cytosol; GTP hydrolysis and joining of the 60S ribosomal subunit; Formation of the ternary complex, and subsequently, the 43S complex; Ribosomal scanning and start codon recognition; Nonsense Mediated…	21	0	0.904	1.021	0.946	1.064	2.136	0.916	1.021	0.997	1.105	0.683	0.93	1.032	0.968	1.106	1.105	0.969	1.019	0.962	1.041	2.38
TRUE	High	Master Protein	P21707	Synaptotagmin-1 OS=Rattus norvegicus GN=Syt1 PE=1 SV=3	0	FALSE	84.198	14	5	186	3	421	47.4	8.41	699.76	5	cell differentiation;cell organization and biogenesis;regulation of biological process;response to stimulus;transport	cytoplasm;Golgi;membrane	metal ion binding;protein binding	Pf00168	25716	ENSRNOG00000006426.6	Syt1	7	Synaptic vesicle cycle		Glutamate Neurotransmitter Release Cycle; Acetylcholine Neurotransmitter Release Cycle; Cargo recognition for clathrin-mediated endocytosis; Norepinephrine Neurotransmitter Release Cycle; GABA synthesis, release, reuptake and degradation	12	3	1.036	0.954	1.113	1.055	1.073	1.065	1.037	1.109	1.035	0.776	1.043	0.983	1.113	0.989	1.329	1.095	1.018	1.172	1.061	0.86
TRUE	High	Master Protein	F2Z3Q8	Importin subunit beta-1 OS=Rattus norvegicus GN=Kpnb1 PE=4 SV=1	0	FALSE	84.121	14	10	68	10	876	97.1	4.78	265.83	10	cell organization and biogenesis;cellular component movement;regulation of biological process;response to stimulus;transport	cytosol;membrane	protein binding;RNA binding;transporter activity	Pf02985, Pf03810, Pf13513		ENSRNOG00000009275.4		10			Regulation of cholesterol biosynthesis by SREBP (SREBF); Activation of DNA fragmentation factor; Neutrophil degranulation	12	0	1.084	0.987	1.001	1.13	2.445	0.776	0.977	0.93	0.868	1.192	0.96	1.03	1.012	1.072	1.336	0.953	1.098	1.085	1.151	1.588
TRUE	High	Master Protein	Q66HA8	Heat shock protein 105 kDa OS=Rattus norvegicus GN=Hsph1 PE=2 SV=1	0	FALSE	83.966	12	9	101	8	858	96.4	5.55	430.74	9	metabolic process;regulation of biological process	cytoplasm;cytosol;nucleus	enzyme regulator activity;nucleotide binding;protein binding	Pf00012	288444	ENSRNOG00000000902.7	Hsph1	12	Protein processing in endoplasmic reticulum		Regulation of HSF1-mediated heat shock response	5	1	0.916	0.965	0.978	0.939	0.727	1.007	0.969	0.975	0.98	0.877	0.973	1.064	1.001	1.098	1.407	0.939	1.007	0.98	1.023	1.014
TRUE	High	Master Protein	G3V647	Pyridoxal kinase OS=Rattus norvegicus GN=Pdxk PE=4 SV=1	0	FALSE	83.57	24	6	104	6	312	34.8	6.8	410.21	6	metabolic process		catalytic activity	Pf00294, Pf08543		ENSRNOG00000049937.2		20			Vitamins B6 activation to pyridoxal phosphate; Neutrophil degranulation	7	0	0.934	1.067	0.983	1.059	1.012	0.909	1.061	0.966	1.018	1.536	0.941	0.944	0.823	1.023	0.377	0.953	1.029	0.869	1.022	0.712
TRUE	High	Master Protein	F1LP82	Ras-related protein Rab-2A (Fragment) OS=Rattus norvegicus GN=Rab2a PE=3 SV=2	0	FALSE	83.155	36	8	128	8	196	21.7	6.54	530.02	8	regulation of biological process;response to stimulus		nucleotide binding	Pf00025, Pf00071, Pf08477								0	0	1.142	1.019	1.03	1.05	0.749	1.101	1.014	1.024	1.005	0.621	0.999	1.013	1.014	0.976	0.305	1.009	0.986	1.02	1.092	1.784
TRUE	High	Master Protein	G3V8L3	Lamin A, isoform CRA_b OS=Rattus norvegicus GN=Lmna PE=3 SV=1	0	FALSE	83.152	25	13	62	12	665	74.3	6.98	204.54	13	cell organization and biogenesis;regulation of biological process;response to stimulus;transport	membrane;nucleus	protein binding;structural molecule activity	Pf00038, Pf00932, Pf12128	60374	ENSRNOG00000019638.7	Lmna	2	Dilated cardiomyopathy; Apoptosis; Hypertrophic cardiomyopathy (HCM); Arrhythmogenic right ventricular cardiomyopathy (ARVC)	Adipogenesis; FAS pathway and Stress induction of HSP regulation	Depolymerisation of the Nuclear Lamina; Initiation of Nuclear Envelope Reformation; Breakdown of the nuclear lamina; Clearance of Nuclear Envelope Membranes from Chromatin	22	1	1.028	0.914	1.035	0.894	0.869	0.925	0.985	1.076	1.049	1.304	1.086	1.107	1.043	0.968	2.417	0.797	1.055	0.995	0.672	1.178
TRUE	High	Master Protein	D3ZB78	Protein RGD1559864 OS=Rattus norvegicus GN=RGD1559864 PE=4 SV=1	0	FALSE	82.891	40	12	107	12	363	41.2	5.44	372.41	12	regulation of biological process;response to stimulus		metal ion binding		500446	ENSRNOG00000000129.8	RGD1559864; Phf24	5				0	0	0.972	1.039	0.972	0.954	1.217	0.941	1.049	1.013	0.956	1.077	0.916	1.007	0.994	0.966	1.343	0.835	0.982	1.005	0.915	1.259
TRUE	High	Master Protein	G3V7L8	ATPase, H+ transporting, V1 subunit E isoform 1, isoform CRA_a OS=Rattus norvegicus GN=Atp6v1e1 PE=3 SV=1	0	FALSE	82.791	33	6	146	6	226	26.1	8.43	428.69	6	transport	cytoplasm;cytosol;endosome;membrane;mitochondrion	catalytic activity;protein binding;transporter activity	Pf01991	297566	ENSRNOG00000011905.6	Atp6v1e1	4		Proximal Tubule Transporters; Osteoclast	Ion channel transport; Transferrin endocytosis and recycling; Insulin receptor recycling; ROS, RNS production in phagocytes	13	0	0.811	1.132	1.028	0.831	1.104	0.9	1.046	1.014	0.953	0.628	1.108	1.107	1.001	0.982	0.874	1.059	1.084	0.968	0.893	1.256
TRUE	High	Master Protein	Q05764	Beta-adducin OS=Rattus norvegicus GN=Add2 PE=2 SV=4	0	FALSE	82.595	21	10	121	9	725	80.5	5.97	446.54	10	cell organization and biogenesis;cellular component movement;regulation of biological process;transport	cytoplasm;cytoskeleton;membrane	protein binding;structural molecule activity	Pf00596	24171		Add2	4			Miscellaneous transport and binding events	2	0	0.968	0.987	1.005	0.94	2.086	0.976	0.933	0.971	0.877	1.717	0.998	0.91	0.993	1.053	1.155	0.947	0.977	1.033	0.924	1.5
TRUE	High	Master Protein	P97546	Neuroplastin OS=Rattus norvegicus GN=Nptn PE=1 SV=2	0	FALSE	82.498	24	10	155	10	393	43.9	8.38	558.92	10	cell communication;cell organization and biogenesis;cellular homeostasis;regulation of biological process;response to stimulus	cell surface;membrane	protein binding	Pf00047, Pf07679, Pf07686, Pf13895, Pf13927	56064	ENSRNOG00000009029.7	Nptn	8				0	0	1.008	1.016	1.012	1.071	1.322	0.994	1.064	1.025	1.063	1.393	0.991	1.02	0.993	1.056	0.354	0.97	0.979	0.992	1.068	0.688
TRUE	High	Master Protein	O08651	D-3-phosphoglycerate dehydrogenase OS=Rattus norvegicus GN=Phgdh PE=1 SV=3	0	FALSE	82.333	19	9	96	8	533	56.5	6.71	358.79	9	cell differentiation;cell organization and biogenesis;metabolic process;regulation of biological process		catalytic activity;nucleotide binding	Pf00389, Pf02826	58835	ENSRNOG00000019328.6	Phgdh	2	Biosynthesis of amino acids; Carbon metabolism; Metabolic pathways; Glycine, serine and threonine metabolism		Serine biosynthesis	8	1	1.068	1.03	0.916	1.148	0.75	0.998	1.034	0.903	1.04	1.208	0.994	0.975	0.916	1.034	0.819	0.971	0.996	0.908	1.059	0.01
TRUE	High	Master Protein	P61107	Ras-related protein Rab-14 OS=Rattus norvegicus GN=Rab14 PE=1 SV=3	0	FALSE	82.307	33	6	131	5	215	23.9	6.21	488.46	6	cell organization and biogenesis;defense response;regulation of biological process;response to stimulus;transport	cytosol;endoplasmic reticulum;endosome;Golgi;membrane;vacuole	catalytic activity;nucleotide binding;protein binding	Pf00009, Pf00025, Pf00071, Pf04670, Pf08477	94197		Rab14	3	AMPK signaling pathway			1	0	1.01	1.088	0.992	1.068	1.342	1.015	1.069	1.024	1.065	1.467	1.037	1.019	1.04	1.055	2.717	1.11	1.122	1.062	1.001	1.846
TRUE	High	Master Protein	F1M5N4	Malic enzyme OS=Rattus norvegicus GN=Me3 PE=3 SV=2	0	FALSE	82.061	16	7	72	6	605	67.2	7.97	338.42	7	metabolic process	mitochondrion	catalytic activity;metal ion binding;nucleotide binding	Pf00390, Pf03949	361602	ENSRNOG00000017311.7	Me3	1	Metabolic pathways; Pyruvate metabolism; Carbon metabolism			3	1	1.005	1.014	0.98	0.927	1.232	0.99	0.962	0.962	0.873	1.031	1.078	0.935	0.988	0.953	1.761	1.102	0.879	1	0.993	0.999
TRUE	High	Master Protein	Q5U2P5	Protein C2cd2l OS=Rattus norvegicus GN=C2cd2l PE=2 SV=1	0	FALSE	81.656	17	8	50	8	706	76	7.46	198.87	8	regulation of biological process;transport	membrane	transporter activity		300666	ENSRNOG00000009719.7	C2cd2l	8				0	0	0.848	1.252	1.172	0.94	1.17	0.895	1.064	1.106	0.898	1.321	0.845	1.235	1.08	0.875	0.01	0.876	1.239	1.1	0.89	0.01
TRUE	High	Master Protein	Q9WTP0	Band 4.1-like protein 1 OS=Rattus norvegicus GN=Epb41l1 PE=1 SV=1	0	FALSE	81.618	16	13	99	11	879	98.2	5.69	339.38	13	cell organization and biogenesis	cytoplasm;cytoskeleton	protein binding;structural molecule activity	Pf00373, Pf04382, Pf05902, Pf08736, Pf09379, Pf09380	59317		Epb41l1	3	Tight junction			1	2	0.992	1.063	1	1.02	1.349	1.014	1.108	0.987	1.067	1.083	1.031	0.879	0.929	0.936	0.01	1.059	0.956	0.996	0.999	0.865
TRUE	High	Master Protein	Q8CGU4	Arf-GAP with GTPase, ANK repeat and PH domain-containing protein 2 OS=Rattus norvegicus GN=Agap2 PE=1 SV=1	0	FALSE	81.423	13	11	52	11	1186	124.4	9.86	212.35	11	cellular component movement;regulation of biological process;response to stimulus	cytoplasm;cytosol;membrane;mitochondrion;nucleus	catalytic activity;enzyme regulator activity;metal ion binding;nucleotide binding;protein binding	Pf00023, Pf00071, Pf00169, Pf01412, Pf08477, Pf12796, Pf13637, Pf13857	65218	ENSRNOG00000025584.6	Agap2	7	FoxO signaling pathway; Endocytosis			2	0	0.877	1.058	0.968	1.021	0.01	0.875	1.145	1.103	0.914	0.01	0.982	1.154	1.043	1.036	0.01	0.995	1.005	0.97	0.97	1.577
TRUE	High	Master Protein	Q64605	Receptor-type tyrosine-protein phosphatase S OS=Rattus norvegicus GN=Ptprs PE=1 SV=2	0	FALSE	81.239	7	11	53	7	1907	211.8	7.23	185.33	11	metabolic process;regulation of biological process	membrane	catalytic activity;protein binding	Pf00041, Pf00047, Pf00102, Pf00782, Pf07679, Pf09294, Pf13895, Pf13927, Pf14566	25529		Ptprs	9				0	0	0.923	0.912	1.022	1.037	1.356						0.796	1.005	0.948	0.982	0.01	0.835	0.876	0.947	0.981	0.01
TRUE	High	Master Protein	D3ZC84	Ubiquitin carboxyl-terminal hydrolase OS=Rattus norvegicus GN=Usp9x PE=3 SV=1	0	FALSE	81.001	6	13	117	13	2547	289.3	5.78	428.75	13	cell growth;cellular component movement;metabolic process;regulation of biological process;response to stimulus	cytoplasm;membrane	catalytic activity;protein binding	Pf00443, Pf13423	363445	ENSRNOG00000003261.7	Usp9x	X			Synthesis of active ubiquitin: roles of E1 and E2 enzymes; Ub-specific processing proteases; Downregulation of SMAD2/3:SMAD4 transcriptional activity	14	0	1.023	1.021	1.015	1.032	0.505	0.994	1.04	1.085	1.049	1.221	1.033	1.052	0.961	0.915	1.022	0.974	1.012	0.923	1.022	0.336
TRUE	High	Master Protein	F1M6P0	Uncharacterized protein (Fragment) OS=Rattus norvegicus PE=3 SV=2	0	FALSE	80.93	14	4	230	1	421	45.6	5.45	1044.62	4				Pf00113, Pf03952								0	0						0.981	0.879	0.979	1.337	1.508
TRUE	High	Master Protein	P01830	Thy-1 membrane glycoprotein OS=Rattus norvegicus GN=Thy1 PE=1 SV=1	0	FALSE	80.859	33	6	185	6	161	18.2	9.28	722.62	6	cell communication;cell organization and biogenesis;metabolic process;regulation of biological process;response to stimulus	cell surface;cytosol;endoplasmic reticulum;membrane	DNA binding;enzyme regulator activity;protein binding	Pf00047, Pf02899	24832	ENSRNOG00000006604.3	Thy1	8	Leukocyte transendothelial migration		Post-translational modification: synthesis of GPI-anchored proteins	4	0	1.012	0.888	0.965	0.84	0.625	1.003	0.949	0.979	0.909	0.855	0.946	0.929	1.003	0.761	0.01	1.017	0.98	1.037	0.916	0.742
TRUE	High	Master Protein	D4A3B0	Protein Tln2 OS=Rattus norvegicus GN=Tln2 PE=4 SV=2	0	FALSE	80.677	7	11	35	9	2132	228	5.87	127.31	11	cell organization and biogenesis		protein binding;structural molecule activity	Pf00373, Pf02174, Pf08913, Pf09141, Pf09379								0	2	0.974	1.042	1.041	0.974	1.753	0.807	1.107	1.097	0.855	0.01	1.079	1.172	0.998	1.008	2.426
TRUE	High	Master Protein	D4ACB8	Chaperonin subunit 8 (Theta) (Predicted), isoform CRA_a OS=Rattus norvegicus GN=Cct8 PE=3 SV=1	0	FALSE	80.622	21	10	128	10	548	59.6	5.54	508.2	10	cell organization and biogenesis;metabolic process;regulation of biological process;transport	cytoplasm;cytoskeleton;cytosol	nucleotide binding;protein binding	Pf00118	288305	ENSRNOG00000001592.6	Cct8	11			Association of TriC/CCT with target proteins during biosynthesis; Neutrophil degranulation; Cooperation of PDCL (PhLP1) and TRiC/CCT in G-protein beta folding	8	0	1.035	0.981	0.945	1.026	1.014	1.065	1.001	0.946	1.047	0.01	1.058	0.965	0.96	0.984	1.45	1.103	0.973	1.015	1.023	1.555
TRUE	High	Master Protein	P85834	Elongation factor Tu, mitochondrial OS=Rattus norvegicus GN=Tufm PE=1 SV=1	0	FALSE	80.582	19	7	105	7	452	49.5	7.56	435.16	7	metabolic process;response to stimulus	membrane;mitochondrion	catalytic activity;nucleotide binding;RNA binding	Pf00009, Pf03143, Pf03144	293481	ENSRNOG00000018604.6	Tufm	1				0	0	0.986	0.984	1.029	1.002	1.247	0.961	0.951	1.029	1.064	1.022	0.945	1.02	0.942	0.893	0.76	1	0.978	0.98	0.96	0.01
TRUE	High	Master Protein	F1LUM5	Protein Tubal3 OS=Rattus norvegicus GN=Tubal3 PE=3 SV=2	0	FALSE	80.373	11	4	211	1	382	42.8	6.02	726.82	4	cell organization and biogenesis	cytoplasm;cytoskeleton	catalytic activity;nucleotide binding;structural molecule activity	Pf00091, Pf03953	291287	ENSRNOG00000028750.5	Tubal3	17	Phagosome; Apoptosis; Gap junction			3	0	1.085	1.07	0.994	1.548	1.265	1.117	1.087	0.995	1.573	2.206	1.176	1.117	1.105	1.617	3.255	1.131	1.075	1.084	1.417	1.735
TRUE	High	Master Protein	D4AEH9	Amylo-1, 6-glucosidase, 4-alpha-glucanotransferase (Glycogen debranching enzyme, glycogen storage disease type III) (Predicted), isoform CRA_a OS=Rattus norvegicus GN=Agl PE=4 SV=1	0	FALSE	79.682	11	10	84	10	1532	174.2	6.74	345.85	10	metabolic process;response to stimulus	cytoplasm;endoplasmic reticulum;nucleus	catalytic activity;protein binding	Pf00128, Pf06202, Pf14699, Pf14701, Pf14702	362029	ENSRNOG00000016214.5	Agl	2	Metabolic pathways; Starch and sucrose metabolism	Glycogen Metabolism	Glycogen breakdown (glycogenolysis); Neutrophil degranulation	10	0	1.052	1.088	1.026	0.978	0.916	1.058	1.017	1.037	1.035	0.788	1.017	1.017	1.045	1.063	1.25	0.997	1.038	1.017	1.128	0.77
TRUE	High	Master Protein	P29147	D-beta-hydroxybutyrate dehydrogenase, mitochondrial OS=Rattus norvegicus GN=Bdh1 PE=1 SV=2	0	FALSE	79.588	31	8	92	8	343	38.2	8.84	310.93	8	metabolic process;response to stimulus	membrane;mitochondrion;organelle lumen	catalytic activity	Pf00106, Pf08643, Pf13561	117099		Bdh1	11	Synthesis and degradation of ketone bodies; Butanoate metabolism; Metabolic pathways	Synthesis and Degradation of Ketone Bodies		4	0	1.041	1.034	0.931	1.092	1.347	1.012	1.003	0.861	1.122	1.653	1.024	1.02	0.981	1.094	1.474	1.031	1.002	0.968	1.058	1.125
TRUE	High	Master Protein	G3V914	Glutamate receptor 2 OS=Rattus norvegicus GN=Gria2 PE=4 SV=2	0	FALSE	79.427	14	9	66	6	883	98.8	7.75	227.41	9	regulation of biological process;response to stimulus;transport	membrane	receptor activity;signal transducer activity;transporter activity	Pf00060, Pf00497, Pf01094, Pf10613, Pf13458		ENSRNOG00000054204.1		2			Activation of AMPA receptors; Trafficking of GluR2-containing AMPA receptors; Unblocking of NMDA receptor, glutamate binding and activation	9	1	0.827	0.844	0.889	0.917	1.216	0.912	0.796	0.87	0.98	0.01	0.862	0.682	0.789	0.874	0.01	0.82	0.609	0.749	0.835	0.01
TRUE	High	Master Protein	Q4FZT9	26S proteasome non-ATPase regulatory subunit 2 OS=Rattus norvegicus GN=Psmd2 PE=2 SV=1	0	FALSE	79.299	16	11	66	11	908	100.1	5.2	321.76	11	metabolic process;regulation of biological process	membrane;nucleus;proteasome	catalytic activity;enzyme regulator activity	Pf01851	287984	ENSRNOG00000001719.6	Psmd2	11	Epstein-Barr virus infection; Proteasome	Proteasome Degradation	Interleukin-1 family signaling; Neutrophil degranulation; Regulation of RUNX2 expression and activity; The role of GTSE1 in G2/M progression after G2 checkpoint; Ubiquitin Mediated Degradation of Phosphorylated Cdc25A; Asymmetric localization of PCP proteins; APC/C:Cdh1 mediated degradation of Cdc20 and other APC/C:Cdh1 targeted proteins in late mitosis/early G1; Regulation of PTEN stability and …	129	0	1.112	1.133	1.008	1.178	0.691	1.081	1.107	1.006	1.177	0.751	1.026	1.068	1.008	1.101	1.069	1.09	1.448	0.978	1.991	6.332
TRUE	High	Master Protein	F1LNM3	Protein Ank3 OS=Rattus norvegicus GN=Ank3 PE=4 SV=2	0	FALSE	78.25	5	12	105	2	2598	281.5	7.94	368.91	12	regulation of biological process;response to stimulus		protein binding	Pf00023, Pf00531, Pf00791, Pf12796, Pf13606, Pf13637, Pf13857								0	6											0.97	0.945	1.071	1.108	0.01	0.901	0.866	0.961	1.175	0.01
TRUE	High	Master Protein	P20070	NADH-cytochrome b5 reductase 3 OS=Rattus norvegicus GN=Cyb5r3 PE=1 SV=2	0	FALSE	78.248	20	4	100	4	301	34.2	8.38	536.99	4	metabolic process	cytoplasm;endoplasmic reticulum;membrane;mitochondrion	catalytic activity;nucleotide binding	Pf00175, Pf00970	25035	ENSRNOG00000009592.6	Cyb5r3	7	Amino sugar and nucleotide sugar metabolism		Phase I - Functionalization of compounds; Vitamin C (ascorbate) metabolism; Neutrophil degranulation	10	0	1.119	1.002	1.024	0.96	1.418	1.124	0.998	0.964	0.945	1.693	1.089	1.012	0.978	0.982	0.411	1.073	0.925	0.968	0.99	0.01
TRUE	High	Master Protein	Q6IU14	Acyl-CoA synthetase isoform 6 variant2 OS=Rattus norvegicus GN=Acsl6 PE=2 SV=1	0	FALSE	77.835	15	9	93	9	697	78.2	7.21	427.64	9	cell proliferation;metabolic process;regulation of biological process;response to stimulus;transport	membrane;mitochondrion;nucleus	catalytic activity;nucleotide binding;protein binding	Pf00501	117243		Acsl6	10		Fatty Acid Beta Oxidation; Beta Oxidation Meta Pathway; Fatty Acid Biosynthesis		3	0	1.106	0.964	0.944	0.992	2.038	1.104	0.991	0.923	1.005	0.822	0.996	0.969	1.032	1.089	1.364	0.947	0.928	1.004	1.045	1.164
TRUE	High	Master Protein	P17764	Acetyl-CoA acetyltransferase, mitochondrial OS=Rattus norvegicus GN=Acat1 PE=1 SV=1	0	FALSE	77.788	11	3	68	3	424	44.7	8.76	318.82	3	cell organization and biogenesis;metabolic process;response to stimulus	membrane;mitochondrion;organelle lumen	catalytic activity;metal ion binding;protein binding	Pf00108, Pf00109, Pf02803	25014	ENSRNOG00000007862.6	Acat1	8	Metabolic pathways; Fatty acid metabolism; Terpenoid backbone biosynthesis; Butanoate metabolism; Propanoate metabolism; Fatty acid degradation; Pyruvate metabolism; Lysine degradation; Valine, leucine and isoleucine degradation; Tryptophan metabolism; Carbon metabolism; Synthesis and degradation of ketone bodies; Glyoxylate and dicarboxylate metabolism	Fatty Acid Beta Oxidation; Tryptophan metabolism; Synthesis and Degradation of Ketone Bodies; Beta Oxidation Meta Pathway	Branched-chain amino acid catabolism; Synthesis of Ketone Bodies; Utilization of Ketone Bodies	24	0	0.944	1.089	0.969	1.142	1.047	0.879	1.088	0.928	1.083	0.01	0.901	1.045	0.96	0.82	0.01	0.895	1.236	1.055	0.955	0.01
TRUE	High	Master Protein	Q5XIH3	NADH dehydrogenase (Ubiquinone) flavoprotein 1 OS=Rattus norvegicus GN=Ndufv1 PE=2 SV=1	0	FALSE	77.652	22	9	145	9	464	50.7	8.07	558.46	9	metabolic process;transport	cytosol;membrane;mitochondrion	catalytic activity;metal ion binding;nucleotide binding	Pf01512, Pf10531, Pf10589	293655	ENSRNOG00000018117.6	Ndufv1	1	Non-alcoholic fatty liver disease (NAFLD); Metabolic pathways; Alzheimer's disease; Huntington's disease; Parkinson's disease; Oxidative phosphorylation	Oxidative phosphorylation; Electron Transport Chain	Complex I biogenesis	13	0	1.083	1.039	0.985	1.005	0.994	1.055	1.009	0.973	1.091	1.294	1.061	1.017	1.009	0.984	0.707	1.05	0.956	0.981	1.055	1.314
TRUE	High	Master Protein	P85515	Alpha-centractin OS=Rattus norvegicus GN=Actr1a PE=1 SV=1	0	FALSE	77.332	27	8	83	4	376	42.6	6.64	356.64	8		cytoplasm;cytoskeleton	nucleotide binding	Pf00022	294010	ENSRNOG00000019725.5	Actr1a	1			Regulation of PLK1 Activity at G2/M Transition; HSP90 chaperone cycle for steroid hormone receptors (SHR); AURKA Activation by TPX2; Recruitment of mitotic centrosome proteins and complexes; Loss of Nlp from mitotic centrosomes; Anchoring of the basal body to the plasma membrane; MHC class II antigen presentation; COPI-independent Golgi-to-ER retrograde traffic; Recruitment of NuMA to mitotic cen…	33	0	0.814	0.91	1.062	1.08	2.225	0.819	0.884	1.073	1.098	0.825	0.918	0.932	1.078	1.034	0.641	0.918	0.957	1.091	1.042	0.01
TRUE	High	Master Protein	Q6IMZ3	Annexin OS=Rattus norvegicus GN=Anxa6 PE=2 SV=1	0	FALSE	77.196	19	15	91	1	673	75.7	5.57	290.71	15	cell organization and biogenesis;cellular homeostasis;regulation of biological process;response to stimulus;transport	cytoplasm;membrane;mitochondrion;nucleus	metal ion binding;nucleotide binding;protein binding;transporter activity	Pf00191	79125	ENSRNOG00000010668.7	Anxa6	10		Prostaglandin Synthesis and Regulation; Calcium Regulation in the Cardiac Cell		2	14	0.971	1.03	0.964	0.822	0.594	0.964	0.986	0.984	0.811	1.502	0.874	1.035	1.035	0.729	0.01	0.929	1.049	1.049	0.74	0.316
TRUE	High	Master Protein	D3Z9C7	Protein piccolo (Fragment) OS=Rattus norvegicus GN=Pclo PE=4 SV=2	0	FALSE	76.224	4	9	21	1	3894	427	5.54	89.45	9			metal ion binding;protein binding	Pf00168, Pf00595, Pf05715, Pf15449								0	0
TRUE	High	Master Protein	Q9JKS6	Protein piccolo OS=Rattus norvegicus GN=Pclo PE=1 SV=1	0	FALSE	76.224	3	9	21	1	5085	552.4	6.54	89.28	9	cell organization and biogenesis;regulation of biological process;response to stimulus;transport	cytoskeleton	metal ion binding;protein binding	Pf00168, Pf00595, Pf03154, Pf05715, Pf07223, Pf09770, Pf13388	56768		Pclo	4	Insulin secretion			1	8	1.11	1.27	0.974	1.208	0.01	1.088	1.275	0.797	0.921	0.01						1.007	0.861	0.913	0.963	1.883
TRUE	High	Master Protein	Q99NA5	Isocitrate dehydrogenase [NAD] subunit alpha, mitochondrial OS=Rattus norvegicus GN=Idh3a PE=1 SV=1	0	FALSE	76.025	15	6	154	6	366	39.6	6.92	591.09	6	metabolic process	mitochondrion;nucleus	catalytic activity;metal ion binding;nucleotide binding	Pf00180	114096		Idh3a	8	Biosynthesis of amino acids; 2-Oxocarboxylic acid metabolism; Metabolic pathways; Citrate cycle (TCA cycle); Carbon metabolism	TCA Cycle		6	0	1.01	0.971	1.051	1.121	0.323	1.06	0.999	0.991	1.031	1.196	0.976	0.92	1.001	1.04	1.414	1.019	1.017	1.014	1.039	0.937
TRUE	High	Master Protein	Q6URK4	Heterogeneous nuclear ribonucleoprotein A3 OS=Rattus norvegicus GN=Hnrnpa3 PE=1 SV=1	0	FALSE	75.971	22	7	116	2	379	39.6	9.01	483.31	7	metabolic process;transport	cytoplasm;nucleus;spliceosomal complex	RNA binding;transporter activity	Pf00076, Pf13893, Pf14259	362152	ENSRNOG00000052968.1	Hnrnpa3	3	Spliceosome		mRNA Splicing - Major Pathway	5	6	0.992	0.917	1.037	1.035	1.286	0.995	0.856	1.048	0.925	1.085	1.09	0.856	1.053	1.029	0.778	1.086	0.782	1.088	1.02	0.798
TRUE	High	Master Protein	D4AC23	Protein Cct7 OS=Rattus norvegicus GN=Cct7 PE=3 SV=1	0	FALSE	75.837	17	9	104	9	544	59.6	8	361.33	9	metabolic process;regulation of biological process;transport	cytoplasm;mitochondrion	nucleotide binding;protein binding	Pf00118	297406	ENSRNOG00000015630.5	Cct7	4			Association of TriC/CCT with target proteins during biosynthesis; Cooperation of PDCL (PhLP1) and TRiC/CCT in G-protein beta folding	5	0	0.939	1.13	1.15	1.067	0.844	0.969	1.177	1.074	0.991	0.991	0.961	1.101	1.01	1	0.01	0.984	1.119	1.007	0.972	1.348
TRUE	High	Master Protein	Q64560	Tripeptidyl-peptidase 2 OS=Rattus norvegicus GN=Tpp2 PE=2 SV=3	0	FALSE	75.728	8	8	49	8	1249	138.2	6.38	218.87	8	metabolic process	cytoplasm;cytosol;nucleus	catalytic activity;protein binding	Pf00082, Pf12580	81815	ENSRNOG00000011194.6	Tpp2	9			Antigen processing: Ubiquitination & Proteasome degradation	4	0	0.988	0.98	1.047	0.915	0.653	0.981	0.97	0.989	0.901	0.99	0.927	0.865	0.898	0.701	0.01	1.09	0.973	1.027	0.867	1.291
TRUE	High	Master Protein	D4ABR6	Annexin (Fragment) OS=Rattus norvegicus GN=Anxa6 PE=3 SV=2	0	FALSE	75.661	22	15	92	1	671	75.6	5.68	293.45	15			metal ion binding	Pf00191, Pf02181								0	0
TRUE	High	Master Protein	Q66HD0	Endoplasmin OS=Rattus norvegicus GN=Hsp90b1 PE=1 SV=2	0	FALSE	75.642	16	12	146	12	804	92.7	4.81	455	12	cell organization and biogenesis;metabolic process;regulation of biological process;response to stimulus;transport	cytosol;endoplasmic reticulum;membrane;nucleus;organelle lumen	nucleotide binding;protein binding;RNA binding	Pf00183, Pf02518, Pf13589	362862		Hsp90b1	7	Protein processing in endoplasmic reticulum; Pathways in cancer; Prostate cancer; Thyroid hormone synthesis; PI3K-Akt signaling pathway; Estrogen signaling pathway			6	0	0.99	1.09	1.052	1.006	1.491	0.972	1.139	1.075	1.032	1.063	1.04	1.229	1.082	1.142	0.817	1.006	1.188	1.052	1.077	0.776
TRUE	High	Master Protein	P50554	4-aminobutyrate aminotransferase, mitochondrial OS=Rattus norvegicus GN=Abat PE=1 SV=3	0	FALSE	75.519	24	9	135	9	500	56.4	7.93	526.43	9	metabolic process;regulation of biological process;response to stimulus	mitochondrion;organelle lumen	catalytic activity;metal ion binding;protein binding	Pf00202, Pf13481	81632	ENSRNOG00000002636.7	Abat	10	GABAergic synapse; Propanoate metabolism; Butanoate metabolism; Alanine, aspartate and glutamate metabolism; Metabolic pathways; beta-Alanine metabolism; Valine, leucine and isoleucine degradation	Alanine and aspartate metabolism	Degradation of GABA	13	0	1.062	1.242	0.848	1.498	0.01	0.924	1.145	1.148	1.213	1.013	1.105	1.134	0.991	1.187	0.01	1.003	1.083	0.959	1.221	1.083
TRUE	High	Master Protein	I7FKL4	Myelin basic protein transcript variant 1 OS=Rattus norvegicus GN=Mbp PE=2 SV=1	0	FALSE	75.495	35	9	245	9	195	21.5	11.24	686.77	9	cell organization and biogenesis;metabolic process;regulation of biological process;response to stimulus	membrane	protein binding;structural molecule activity	Pf01669	24547	ENSRNOG00000016516.8	Mbp	18		Spinal Cord Injury; MAPK Cascade		2	0	0.895	0.804	0.783	0.649	0.2	0.868	0.762	0.75	0.609	0.398	0.85	0.754	0.734	0.541	0.694	0.893	0.692	0.674	0.505	0.01
TRUE	High	Master Protein	O35353	Guanine nucleotide-binding protein subunit beta-4 OS=Rattus norvegicus GN=Gnb4 PE=2 SV=4	0	FALSE	75.352	32	8	71	5	340	37.3	6.16	242.92	8	regulation of biological process;response to stimulus	membrane	protein binding;signal transducer activity	Pf00400	294962		Gnb4	2	Chemokine signaling pathway; Pathways in cancer; Retrograde endocannabinoid signaling; Circadian entrainment; PI3K-Akt signaling pathway; Alcoholism; Ras signaling pathway; Cholinergic synapse; Dopaminergic synapse; Glutamatergic synapse; Serotonergic synapse; Morphine addiction; GABAergic synapse	Myometrial Relaxation and Contraction Pathways; Calcium Regulation in the Cardiac Cell		15	3	0.884	1.127	1.068	0.871	1.081	0.803	1.127	1.06	0.858	0.425	0.823	1.006	0.997	0.96	0.01	0.732	1.069	1.07	0.816	0.01
TRUE	High	Master Protein	M0R5M1	Protein Ptprd (Fragment) OS=Rattus norvegicus GN=Ptprd PE=4 SV=1	0	FALSE	75.09	9	13	57	7	1887	211.7	6.58	179.95	13	metabolic process		catalytic activity;protein binding	Pf00041, Pf00047, Pf00102, Pf07679, Pf13895, Pf13927, Pf14566								0	6	0.957	1.033	1.056	1.137	1.014	0.937	1.042	1.109	1.22	1.815	0.988	1.048	1.044	1.084	1.179	0.958	1.075	1.118	1.092	2.428
TRUE	High	Master Protein	D3ZZ99	Alpha-adducin OS=Rattus norvegicus GN=Add1 PE=4 SV=2	0	FALSE	74.708	20	12	90	11	631	69.7	6.55	358.39	12	cell differentiation;cell organization and biogenesis;cellular homeostasis;metabolic process;regulation of biological process;response to stimulus;transport	cytoplasm;cytoskeleton;membrane;nucleus	protein binding;RNA binding;structural molecule activity	Pf00596	24170		Add1	14				0	1	0.861	1.044	1.059	0.91	0.01	1.044	1.062	0.946	0.909	0.988	0.959	1.054	1.096	0.95	0.01	1.006	0.969	1.046	0.997	0.875
TRUE	High	Master Protein	P29315	Ribonuclease inhibitor OS=Rattus norvegicus GN=Rnh1 PE=1 SV=2	0	FALSE	74.471	22	7	24	7	456	49.9	4.79	116.08	7	regulation of biological process	cytoplasm;cytosol	enzyme regulator activity;protein binding		100360501		LOC100360501; Rnh1	1				0	0
TRUE	High	Master Protein	Q63622	Disks large homolog 2 OS=Rattus norvegicus GN=Dlg2 PE=1 SV=1	0	FALSE	74.318	22	13	87	10	852	94.9	6.24	322.88	13	cell communication;cell organization and biogenesis;metabolic process;regulation of biological process	cytoplasm;membrane	catalytic activity;protein binding	Pf00018, Pf00595, Pf00625, Pf07653, Pf10600, Pf13180	64053		Dlg2	1	Hippo signaling pathway	Wnt Signaling Pathway NetPath		2	2	0.944	1.115	1.024	0.963	1.024	0.864	1.212	1.036	0.987	1.873	0.942	1.012	0.964	1.015	0.01	0.981	0.975	1.044	1.002	0.01
TRUE	High	Master Protein	Q5RKI1	Eukaryotic initiation factor 4A-II OS=Rattus norvegicus GN=Eif4a2 PE=1 SV=1	0	FALSE	73.669	22	8	72	2	407	46.4	5.48	325.59	8	metabolic process;regulation of biological process	cytoplasm	catalytic activity;DNA binding;nucleotide binding;RNA binding	Pf00270, Pf00271, Pf04851	303831	ENSRNOG00000001815.6	Eif4a2	11	RNA transport	Translation Factors	ISG15 antiviral mechanism; Translation initiation complex formation; GTP hydrolysis and joining of the 60S ribosomal subunit; Ribosomal scanning and start codon recognition; L13a-mediated translational silencing of Ceruloplasmin expression; Deadenylation of mRNA	19	0	0.978	1.066	0.986	0.882	0.01	0.942	1.043	1.045	0.804	0.01						1.003	1.044	0.993	0.968	0.01
TRUE	High	Master Protein	D3ZAA9	Membrane protein, palmitoylated 2 (MAGUK p55 subfamily member 2), isoform CRA_a OS=Rattus norvegicus GN=Mpp2 PE=4 SV=2	0	FALSE	73.348	27	11	76	10	552	61.5	6.44	280.49	11	cell organization and biogenesis;regulation of biological process	cytoplasm;cytoskeleton;membrane	protein binding	Pf00018, Pf00595, Pf00625, Pf02828, Pf07653, Pf13180, Pf14685	85275	ENSRNOG00000059683.1	Mpp2	10				0	1	1.009	1.011	0.991	1.114	0.01	1.065	1.053	0.975	1.022	0.398	0.951	0.9	1.015	1.038	1.91	0.955	0.969	1.03	1.066	2.561
TRUE	High	Master Protein	Q574D7	Ankyrin G217 OS=Rattus norvegicus GN=Ank3 PE=2 SV=1	0	FALSE	72.974	7	11	104	1	1984	216.5	6.64	362.89	11	cell organization and biogenesis;cellular component movement;regulation of biological process;response to stimulus;transport	cell surface;cytoskeleton;endoplasmic reticulum;membrane;vacuole	protein binding;structural molecule activity	Pf00023, Pf00531, Pf00791, Pf12796, Pf13606, Pf13637, Pf13857	361833		Ank3	20				0	0
TRUE	High	Master Protein	F1M980	Glutaminase kidney isoform, mitochondrial OS=Rattus norvegicus GN=Gls PE=3 SV=1	0	FALSE	72.702	20	6	90	6	476	52.9	6.92	427.92	6	metabolic process		catalytic activity	Pf04960								0	0	0.947	0.961	0.971	1.043	1.197	0.929	0.929	0.965	0.974	1.671	1.023	0.98	0.938	1	1.28	0.971	0.962	0.953	1.025	0.822
TRUE	High	Master Protein	Q5BK63	NADH dehydrogenase [ubiquinone] 1 alpha subcomplex subunit 9, mitochondrial OS=Rattus norvegicus GN=Ndufa9 PE=1 SV=2	0	FALSE	72.682	28	11	182	11	377	42.5	9.82	614.23	11	cell organization and biogenesis;metabolic process;response to stimulus;transport	membrane;mitochondrion;nucleus;organelle lumen	catalytic activity;protein binding	Pf01073, Pf01370, Pf05368, Pf13460	362440	ENSRNOG00000061684.1	Ndufa9	4	Non-alcoholic fatty liver disease (NAFLD); Metabolic pathways; Alzheimer's disease; Huntington's disease; Parkinson's disease; Oxidative phosphorylation	Oxidative phosphorylation; Electron Transport Chain	Complex I biogenesis	13	0	1.035	0.994	0.997	1.211	0.635	0.936	1.005	0.998	1.06	0.913	1.04	0.98	1.003	1.198	0.816	1.048	0.975	0.994	1.185	1.107
TRUE	High	Master Protein	O35987	NSFL1 cofactor p47 OS=Rattus norvegicus GN=Nsfl1c PE=1 SV=1	0	FALSE	72.667	24	6	39	6	370	40.7	5.15	172.02	6	cell organization and biogenesis;metabolic process;regulation of biological process	chromosome;cytoskeleton;cytosol;Golgi;membrane;nucleus	enzyme regulator activity;protein binding	Pf00789, Pf08059, Pf14555	83809	ENSRNOG00000008604.7	Nsfl1c	3	Protein processing in endoplasmic reticulum			1	0
TRUE	High	Master Protein	P16617	Phosphoglycerate kinase 1 OS=Rattus norvegicus GN=Pgk1 PE=1 SV=2	0	FALSE	72.495	14	4	81	2	417	44.5	7.9	371.42	4	cell differentiation;metabolic process;regulation of biological process;response to stimulus	cytoplasm;cytosol;membrane	catalytic activity;nucleotide binding	Pf00162	24644	ENSRNOG00000058249.1	Pgk1	X	Biosynthesis of amino acids; Carbon metabolism; Metabolic pathways; Glycolysis / Gluconeogenesis; HIF-1 signaling pathway	Glycolysis and Gluconeogenesis; Hexoses metabolism in proximal tubules	Glycolysis; Gluconeogenesis	12	2	0.861	0.964	0.924	0.9	0.01	0.887	1.045	1.045	1.021	1.056	0.995	1.04	1.08	0.886	0.01	0.987	0.977	1.038	0.878	0.01
TRUE	High	Master Protein	B2RYG2	Pck2 protein (Fragment) OS=Rattus norvegicus GN=Pck2 PE=2 SV=1	0	FALSE	72.402	18	10	53	9	663	73.2	8	157.63	10	cellular homeostasis;metabolic process;regulation of biological process;response to stimulus	mitochondrion	catalytic activity;nucleotide binding	Pf00821	361042		Pck2	15	Metabolic pathways; PPAR signaling pathway; Proximal tubule bicarbonate reclamation; AMPK signaling pathway; Glucagon signaling pathway; Glycolysis / Gluconeogenesis; Pyruvate metabolism; Adipocytokine signaling pathway; Citrate cycle (TCA cycle); FoxO signaling pathway; Insulin signaling pathway; PI3K-Akt signaling pathway; Insulin resistance	Adipogenesis		14	1	0.917	1.02	0.893	0.77	0.01	0.989	1.029	1.112	1.113	2.223	1.071	0.908	0.922	1.108	0.01	0.99	0.945	0.969	1.088	0.811
TRUE	High	Master Protein	Q6P3V8	Eukaryotic translation initiation factor 4A1 OS=Rattus norvegicus GN=Eif4a1 PE=2 SV=1	0	FALSE	72.252	24	9	79	3	406	46.1	5.48	334.67	9	metabolic process;regulation of biological process	cytoplasm;membrane;nucleus	catalytic activity;DNA binding;nucleotide binding;RNA binding	Pf00270, Pf00271, Pf04851	287436	ENSRNOG00000030628.2	Eif4a1	10	RNA transport	Translation Factors	ISG15 antiviral mechanism; Translation initiation complex formation; GTP hydrolysis and joining of the 60S ribosomal subunit; Ribosomal scanning and start codon recognition; L13a-mediated translational silencing of Ceruloplasmin expression; Deadenylation of mRNA	19	6	0.995	0.887	1.023	0.98	0.666						1.16	1.171	1.155	1.029	1.212	1.068	1.143	1.074	1.008	1.87
TRUE	High	Master Protein	F1LSR4	Latrophilin-1 OS=Rattus norvegicus GN=Lphn1 PE=2 SV=1	0	FALSE	71.968	8	8	36	7	1515	166.6	6.64	134.9	8	regulation of biological process;response to stimulus	membrane	receptor activity;signal transducer activity	Pf00002, Pf01825, Pf02140, Pf02191, Pf02354, Pf02793, Pf12003								0	1											0.861	0.943	0.937	0.809	1.43	0.927	0.982	1.034	0.919	1.062
TRUE	High	Master Protein	D4ABT0	Guanine nucleotide-binding protein G(o) subunit alpha OS=Rattus norvegicus GN=Gnao1 PE=2 SV=2	0	FALSE	71.938	27	8	160	6	354	40	6.01	595.29	8	cell organization and biogenesis;regulation of biological process;response to stimulus	membrane	catalytic activity;metal ion binding;nucleotide binding;protein binding;signal transducer activity	Pf00025, Pf00503	50664		Gnao1	19		Calcium Regulation in the Cardiac Cell; G Protein Signaling Pathways		2	0	0.86	0.945	0.998	0.942	1.032	0.849	0.934	0.985	0.942	0.483	0.882	0.92	1.018	0.907	0.457	0.883	0.938	1.029	0.929	0.909
TRUE	High	Master Protein	F1M3T0	ARF GTPase-activating protein GIT1 (Fragment) OS=Rattus norvegicus GN=Git1 PE=4 SV=2	0	FALSE	71.583	20	10	42	10	754	83.6	7.11	184.41	10			enzyme regulator activity;protein binding	Pf00023, Pf01412, Pf08518, Pf12205, Pf12796, Pf13637, Pf13857								0	0	0.979	1.067	0.969	0.888	0.868						0.985	1.127	1.053	0.991	0.01	0.973	1.065	1.021	1.198	0.01
TRUE	High	Master Protein	D3ZW08	Adenylosuccinate lyase (Predicted) OS=Rattus norvegicus GN=Adsl PE=4 SV=1	0	FALSE	71.44	21	6	38	6	484	54.8	7.11	201.49	6	cell organization and biogenesis;metabolic process;response to stimulus	cytosol;mitochondrion	catalytic activity	Pf00206, Pf10397	315150	ENSRNOG00000018655.5	Adsl	7	Alanine, aspartate and glutamate metabolism; Purine metabolism; Metabolic pathways	Nucleotide Metabolism	Purine ribonucleoside monophosphate biosynthesis	8	0											1.15	1.113	1.024	1.038	2.277	1.186	1.14	0.962	1.126	0.01
TRUE	High	Master Protein	Q99JD4	CLIP-associating protein 2 OS=Rattus norvegicus GN=Clasp2 PE=2 SV=1	0	FALSE	71.333	11	10	59	10	1286	140.6	8.57	246.15	10	cell division;cell organization and biogenesis;cellular component movement;regulation of biological process;response to stimulus	chromosome;cytoplasm;cytoskeleton;cytosol;Golgi;membrane	protein binding	Pf12348	114514	ENSRNOG00000009161.7	Clasp2	8			Resolution of Sister Chromatid Cohesion; Amplification of signal from unattached kinetochores via a MAD2 inhibitory signal; Separation of Sister Chromatids; RHO GTPases Activate Formins	16	0	0.988	1.001	0.99	0.976	1.511	0.921	0.987	1.012	0.992	0.978	1.049	1.221	1.067	1.101	0.01	0.91	0.942	0.917	0.933	1.098
TRUE	High	Master Protein	P11598	Protein disulfide-isomerase A3 OS=Rattus norvegicus GN=Pdia3 PE=1 SV=2	0	FALSE	71.289	20	10	88	10	505	56.6	6.21	277.67	10	cell communication;cellular homeostasis;metabolic process;regulation of biological process;response to stimulus	cell surface;cytoplasm;endoplasmic reticulum;extracellular;membrane;mitochondrion;nucleus;organelle lumen	catalytic activity;protein binding;RNA binding	Pf00085, Pf13098, Pf13848, Pf13899, Pf13905	29468		Pdia3	3	Antigen processing and presentation; Protein processing in endoplasmic reticulum			2	0	1.019	0.977	1.018	1.006	0.8	1.008	0.995	1.052	1.018	0.959	1.025	0.95	1.03	1.024	0.893	1	0.986	1.032	0.975	0.468
TRUE	High	Master Protein	D3ZG43	NADH dehydrogenase (Ubiquinone) Fe-S protein 3 (Predicted), isoform CRA_c OS=Rattus norvegicus GN=Ndufs3 PE=3 SV=1	0	FALSE	70.847	24	5	120	5	264	30.2	7.53	487.07	5	metabolic process;regulation of biological process	membrane;mitochondrion	catalytic activity	Pf00329	295923	ENSRNOG00000009155.6	Ndufs3	3	Alzheimer's disease; Parkinson's disease; Huntington's disease; Oxidative phosphorylation; Non-alcoholic fatty liver disease (NAFLD); Metabolic pathways	Oxidative phosphorylation; Electron Transport Chain	Complex I biogenesis	13	0	1.06	0.947	1.085	0.963	1.08	1.172	1.039	1.06	0.952	0.999	0.973	0.892	1.168	1.058	0.814	0.958	0.885	1.078	1.028	0.533
TRUE	High	Master Protein	Q07266	Drebrin OS=Rattus norvegicus GN=Dbn1 PE=1 SV=3	0	FALSE	70.628	14	7	83	7	707	77.4	4.5	319.6	7	cell communication;cell differentiation;cell organization and biogenesis;cell proliferation;development;regulation of biological process;response to stimulus	cytoplasm;cytoskeleton;membrane	protein binding	Pf00241	81653		Dbn1	17				0	0	1.024	0.964	1.079	1.062	2.029	1.043	0.962	1.015	1.002	1.099	0.92	1.149	1.068	1.044	0.01	0.901	1.092	1.009	0.981	1.385
TRUE	High	Master Protein	P61206	ADP-ribosylation factor 3 OS=Rattus norvegicus GN=Arf3 PE=1 SV=2	0	FALSE	70.544	37	8	115	3	181	20.6	7.43	528.92	8	regulation of biological process;response to stimulus;transport	cytoplasm;Golgi	catalytic activity;nucleotide binding;protein binding;signal transducer activity	Pf00025, Pf00071, Pf00503, Pf01926, Pf04670, Pf08477, Pf09439	140940	ENSRNOG00000054775.1	Arf3	7	Endocytosis			1	5	0.971	1.067	1.04	1.133	0.633	0.93	1.062	1.019	1.139	0.777	1.13	1.048	0.994	0.979	0.65	0.944	1.027	1.065	1.146	1.006
TRUE	High	Master Protein	P48500	Triosephosphate isomerase OS=Rattus norvegicus GN=Tpi1 PE=1 SV=2	0	FALSE	70.502	19	4	132	4	249	26.8	7.24	614.08	4	development;metabolic process	cytosol;nucleus	catalytic activity;protein binding	Pf00121	24849; 100911515	ENSRNOG00000050669.2; ENSRNOG00000015290.6	Tpi1; LOC100911515	4; 9	Fructose and mannose metabolism; Glycolysis / Gluconeogenesis; Biosynthesis of amino acids; Carbon metabolism; Metabolic pathways; Inositol phosphate metabolism	Fatty Acid Beta Oxidation; Glycolysis and Gluconeogenesis; Beta Oxidation Meta Pathway; Hexoses metabolism in proximal tubules	Glycolysis; Gluconeogenesis	15	0	1.061	0.997	0.993	1	0.872	1.032	0.986	1.055	1.056	1.332	1.005	1.014	1.052	1.078	1.864	0.959	1.007	1.045	1.098	0.664
TRUE	High	Master Protein	P32851	Syntaxin-1A OS=Rattus norvegicus GN=Stx1a PE=1 SV=1	0	FALSE	70.438	33	9	79	7	288	33	5.24	266.67	9	cell organization and biogenesis;regulation of biological process;response to stimulus;transport	membrane	protein binding	Pf00804, Pf05739, Pf14523	116470	ENSRNOG00000029165.2	Stx1a	12	SNARE interactions in vesicular transport; Amphetamine addiction; Synaptic vesicle cycle; Insulin secretion		Glutamate Neurotransmitter Release Cycle; Other interleukin signaling; LGI-ADAM interactions; Acetylcholine Neurotransmitter Release Cycle; Norepinephrine Neurotransmitter Release Cycle; GABA synthesis, release, reuptake and degradation	17	2	0.891	1.033	1.003	0.97	1.343	0.913	1.118	1.031	1.003	0.698	0.904	1.105	1.008	0.927	1.552	0.996	1.053	1.047	0.965	1.346
TRUE	High	Master Protein	Q497B0	Omega-amidase NIT2 OS=Rattus norvegicus GN=Nit2 PE=1 SV=1	0	FALSE	70.397	28	5	36	5	276	30.7	7.3	163.97	5	metabolic process	cytoplasm;cytosol;mitochondrion	catalytic activity	Pf00795	288174	ENSRNOG00000027797.4	Nit2	11	Alanine, aspartate and glutamate metabolism		Neutrophil degranulation	4	0											0.888	0.94	0.936	0.915	0.01	0.963	0.984	1.058	1.063	2.108
TRUE	High	Master Protein	P12007	Isovaleryl-CoA dehydrogenase, mitochondrial OS=Rattus norvegicus GN=Ivd PE=1 SV=2	0	FALSE	70.355	29	8	70	8	424	46.4	7.9	252.91	8	cell organization and biogenesis;metabolic process	membrane;mitochondrion;organelle lumen	catalytic activity;nucleotide binding	Pf00441, Pf02770, Pf02771, Pf08028	24513	ENSRNOG00000009421.5	Ivd	3	Valine, leucine and isoleucine degradation; Metabolic pathways		Branched-chain amino acid catabolism	5	0	0.808	1.059	1.054	0.902	0.01	0.848	1.046	1.087	0.936	0.686	0.946	0.928	0.954	0.933	1.441	0.987	0.935	0.97	1.045	1.944
TRUE	High	Master Protein	P43244	Matrin-3 OS=Rattus norvegicus GN=Matr3 PE=1 SV=2	0	FALSE	70.05	11	10	108	10	845	94.4	6.2	397.51	10	defense response;regulation of biological process;response to stimulus	cytoplasm;membrane;nucleus	metal ion binding;protein binding;RNA binding	Pf00076, Pf13893, Pf14259	29150		Matr3	18				0	0	0.987	0.963	1.043	1.035	1.285	1.085	1.016	1.102	1.079	0.528	0.994	0.948	1.047	0.989	1.343	0.993	0.983	1.095	1.002	0.01
TRUE	High	Master Protein	Q4V8H5	Aspartyl aminopeptidase OS=Rattus norvegicus GN=Dnpep PE=2 SV=1	0	FALSE	69.935	26	10	82	10	475	52.5	7.25	273.06	10	metabolic process	cytoplasm;cytosol;extracellular;nucleus	catalytic activity;metal ion binding;protein binding	Pf02127	301529	ENSRNOG00000019772.5	Dnpep	9				0	0	0.971	1.051	1.088	1.085	0.787	0.994	0.988	0.992	0.989	0.6	0.917	1.026	0.997	0.934	0.01	0.914	1.032	0.93	0.861	0.01
TRUE	High	Master Protein	D4AE68	Guanine nucleotide binding protein, alpha q polypeptide, isoform CRA_a OS=Rattus norvegicus GN=Gnaq PE=4 SV=2	0	FALSE	69.855	34	9	55	7	359	42.1	5.68	219.66	9	cell organization and biogenesis;regulation of biological process;response to stimulus	cytosol;membrane	catalytic activity;enzyme regulator activity;metal ion binding;nucleotide binding;protein binding;signal transducer activity	Pf00025, Pf00503	81666	ENSRNOG00000014183.5	Gnaq	1		Myometrial Relaxation and Contraction Pathways; Calcium Regulation in the Cardiac Cell; Angiotensin signaling in thick ascending limbs; G Protein Signaling Pathways	Thromboxane signalling through TP receptor; Platelet sensitization by LDL; Acetylcholine regulates insulin secretion; Thrombin signalling through proteinase activated receptors (PARs); Fatty Acids bound to GPR40 (FFAR1) regulate insulin secretion; Gastrin-CREB signalling pathway via PKC and MAPK; ADP signalling through P2Y purinoceptor 1	23	2	0.905	1.035	1.111	0.982	1.892						1.023	1.096	1.083	1.004	1.707	0.983	0.949	1.026	0.965	1.828
TRUE	High	Master Protein	D3ZYN2	Protein Kif21a (Fragment) OS=Rattus norvegicus GN=Kif21a PE=3 SV=2	0	FALSE	69.798	10	9	55	7	1602	179.2	6.33	250.92	9	cell organization and biogenesis;cellular component movement;metabolic process	cytoplasm	catalytic activity;motor activity;nucleotide binding;protein binding	Pf00225, Pf00400, Pf00769, Pf01576, Pf02050, Pf02090, Pf02841, Pf04111, Pf05483, Pf10174, Pf12128, Pf13863, Pf15619								0	2	1.1	1.028	0.877	0.947	0.01	1.025	1.02	0.961	0.891	0.39	0.934	0.959	0.924	0.951	0.01	0.901	0.913	0.843	0.963	1.509
TRUE	High	Master Protein	D3ZAY2	Protein Epb41l2 OS=Rattus norvegicus GN=Epb41l2 PE=4 SV=2	0	FALSE	69.775	14	8	51	7	691	76.9	6.6	231.65	8		cytoskeleton	protein binding;structural molecule activity	Pf00373, Pf05902, Pf08736, Pf09379, Pf09380								0	0	1.008	0.913	0.979	0.875	0.85	1.01	0.921	0.961	0.917	0.938	0.949	0.93	0.942	0.954	0.515	0.836	0.901	0.982	0.973	0.01
TRUE	High	Master Protein	B0BN52	Mitochondrial carrier homolog 2 (C. elegans) OS=Rattus norvegicus GN=Mtch2 PE=2 SV=1	0	FALSE	69.626	24	8	132	8	303	33.5	8.25	554.42	8	cell death;cell organization and biogenesis;cellular component movement;metabolic process;regulation of biological process;response to stimulus;transport	membrane;mitochondrion;nucleus		Pf00153	295922		Mtch2	3				0	0	1.108	0.912	0.777	0.814	0.364	1.042	0.927	0.878	0.854	0.692	1.03	0.933	0.943	0.934	0.828	1.05	0.882	0.942	0.923	0.01
TRUE	High	Master Protein	F1LTP6	Uncharacterized protein OS=Rattus norvegicus PE=3 SV=2	0	FALSE	69.473	14	5	157	1	377	41.1	6.55	632.92	5				Pf00113, Pf03952								0	0
TRUE	High	Master Protein	G3V846	Excitatory amino acid transporter 1 OS=Rattus norvegicus GN=Slc1a3 PE=4 SV=1	0	FALSE	69.388	10	4	96	4	543	59.6	8.4	419.17	4	cell organization and biogenesis;metabolic process;regulation of biological process;response to stimulus;transport	cell surface;membrane	metal ion binding;transporter activity	Pf00375	29483	ENSRNOG00000016163.7	Slc1a3	2	Glutamatergic synapse		Glutamate Neurotransmitter Release Cycle; Astrocytic Glutamate-Glutamine Uptake And Metabolism; Transport of inorganic cations/anions and amino acids/oligopeptides	10	0	1.052	1.317	0.961	1.24	1.19	1.036	1.193	0.97	1.176	1.164	0.935	1.324	0.949	1.256	1.639	0.902	1.329	0.915	1.067	0.01
TRUE	High	Master Protein	D4A9D6	DEAH (Asp-Glu-Ala-His) box polypeptide 9 (Predicted) OS=Rattus norvegicus GN=Dhx9 PE=4 SV=1	0	FALSE	68.997	11	10	48	10	1174	131.6	6.35	189.81	10	cell death;cell differentiation;cell organization and biogenesis;metabolic process;regulation of biological process;response to stimulus	cytoplasm;cytoskeleton;membrane;nucleus;ribosome	catalytic activity;DNA binding;nucleotide binding;protein binding;RNA binding	Pf00035, Pf00270, Pf00271, Pf04408, Pf07717	304859	ENSRNOG00000002735.6	Dhx9	13		mRNA processing	Interleukin-1 family signaling; mRNA Splicing - Major Pathway; RIP-mediated NFkB activation via ZBP1; TAK1 activates NFkB by phosphorylation and activation of IKKs complex; Activated TLR4 signalling; DEx/H-box helicases activate type I IFN and inflammatory cytokines production ; TRAF6 mediated NF-kB activation	34	0	1.059	1.059	0.954	0.961	1.088	1.1	1.114	1.028	0.991	1.006	1.02	1.074	0.991	0.915	0.77	1.011	1.07	1.05	0.91	1.574
TRUE	High	Master Protein	P28480	T-complex protein 1 subunit alpha OS=Rattus norvegicus GN=Tcp1 PE=1 SV=1	0	FALSE	68.968	23	10	111	10	556	60.3	6.21	380.94	10	metabolic process;regulation of biological process;transport	cytoplasm;cytoskeleton;Golgi	nucleotide binding;protein binding;RNA binding	Pf00118	24818	ENSRNOG00000014160.4	Tcp1	1			Association of TriC/CCT with target proteins during biosynthesis; Cooperation of PDCL (PhLP1) and TRiC/CCT in G-protein beta folding	5	0	0.983	1.071	1.101	1.111	0.983	1.037	0.997	1.065	1.147	0.712	1.118	1.016	1.1	1.217	2.126	1.131	0.998	1.101	1.272	2.018
TRUE	High	Master Protein	P85973	Purine nucleoside phosphorylase OS=Rattus norvegicus GN=Pnp PE=1 SV=1	0	FALSE	68.813	40	8	70	8	289	32.3	6.93	279.03	8	metabolic process;regulation of biological process;response to stimulus;transport	cytoplasm;cytoskeleton;extracellular;nucleus	catalytic activity	Pf01048	290029	ENSRNOG00000009982.6	Pnp	15			Purine catabolism; Purine salvage; Neutrophil degranulation	9	0	1.036	1.167	1.04	0.937	0.01	1.024	1.036	1.05	0.898	1.488	0.997	1.082	1.005	0.8	0.975	1.041	1.031	0.997	0.8	0.01
TRUE	High	Master Protein	P35571	Glycerol-3-phosphate dehydrogenase, mitochondrial OS=Rattus norvegicus GN=Gpd2 PE=1 SV=1	0	FALSE	68.802	21	14	80	14	727	80.9	6.62	238.79	14	metabolic process	membrane;mitochondrion	catalytic activity;metal ion binding	Pf00890, Pf01266, Pf03486, Pf07992, Pf12831, Pf13405, Pf13499	25062		Gpd2	3	Glycerophospholipid metabolism	Fatty Acid Beta Oxidation; Beta Oxidation Meta Pathway; Lipid Droplet Metabolism		4	0	1.118	1.157	0.991	0.913	0.631	1.058	1.044	0.916	0.92	0.01	1.023	0.974	1.026	0.981	1.477	0.971	0.944	1.029	0.986	1.509
TRUE	High	Master Protein	D3ZC55	Heat shock 70kDa protein 12A (Predicted), isoform CRA_a OS=Rattus norvegicus GN=Hspa12a PE=4 SV=1	0	FALSE	68.497	11	8	118	8	675	74.8	6.61	438.86	8				Pf00012	307997	ENSRNOG00000018019.5	Hspa12a	1				0	0	0.945	0.974	1.004	0.971	0.411	1.011	1.024	1.017	1.002	0.331	0.995	0.97	0.988	0.999	0.713	0.988	0.99	0.989	0.966	0.865
TRUE	High	Master Protein	Q64568	Plasma membrane calcium-transporting ATPase 3 OS=Rattus norvegicus GN=Atp2b3 PE=2 SV=2	0	FALSE	68.432	13	18	167	6	1258	138.5	5.94	490.38	18	cellular homeostasis;transport	Golgi;membrane	catalytic activity;metal ion binding;nucleotide binding;protein binding;transporter activity	Pf00122, Pf00689, Pf00690, Pf00702, Pf08282, Pf12424, Pf12710, Pf13246	29599		Atp2b3	X	cAMP signaling pathway; Salivary secretion; Pancreatic secretion; cGMP-PKG signaling pathway; Calcium signaling pathway; Adrenergic signaling in cardiomyocytes	Calcium Regulation in the Cardiac Cell	Ion homeostasis; Ion transport by P-type ATPases; Reduction of cytosolic Ca++ levels	17	1	1.078	1.052	1.15	1.123	0.01	1.017	1.005	1.085	1.005	1.739	0.956	1.02	1.033	1.027	0.01	0.999	1.029	1.051	1.053	0.01
TRUE	High	Master Protein	G3V7Q6	Proteasome subunit beta type OS=Rattus norvegicus GN=Psmb5 PE=3 SV=1	0	FALSE	68.261	35	7	66	7	263	28.5	7.02	260.72	7	metabolic process;response to stimulus	cytoplasm;nucleus;proteasome	catalytic activity	Pf00227	29425	ENSRNOG00000013386.7	Psmb5	15	Proteasome	Proteasome Degradation; TNF-alpha NF-kB Signaling Pathway	Interleukin-1 family signaling; Regulation of RUNX2 expression and activity; The role of GTSE1 in G2/M progression after G2 checkpoint; Ubiquitin Mediated Degradation of Phosphorylated Cdc25A; Asymmetric localization of PCP proteins; APC/C:Cdh1 mediated degradation of Cdc20 and other APC/C:Cdh1 targeted proteins in late mitosis/early G1; Regulation of PTEN stability and activity; ABC-family prote…	128	0	0.828	1.133	1.09	0.942	0.798	0.889	1.189	1.067	0.964	0.01	0.912	1.152	1.034	1.053	0.01	0.91	1.165	1.088	1.104	0.01
TRUE	High	Master Protein	Q08877	Dynamin-3 OS=Rattus norvegicus GN=Dnm3 PE=1 SV=2	0	FALSE	68.153	15	13	137	4	869	97.9	8.35	413.66	13	cell organization and biogenesis;regulation of biological process;transport	cytoplasm;cytoskeleton;cytosol;Golgi;membrane;mitochondrion	catalytic activity;nucleotide binding;protein binding	Pf00169, Pf00350, Pf01031, Pf02212	171574	ENSRNOG00000026490.6	Dnm3	13	Endocytosis; Synaptic vesicle cycle; Phospholipase D signaling pathway; Bacterial invasion of epithelial cells; Endocrine and other factor-regulated calcium reabsorption			5	2	0.99	1.023	1.06	1.055	1.038	0.926	0.94	1.095	0.929	1.132	1.232	1.015	1.032	1.043	1.904	1.344	1.096	1.091	1.131	0.01
TRUE	High	Master Protein	R9PY00	Vesicle-associated membrane protein 2 (Fragment) OS=Rattus norvegicus GN=Vamp2 PE=4 SV=1	0	FALSE	68.108	46	5	149	5	115	12.6	8.13	698.47	5	transport			Pf00957								0	0	0.974	1.034	0.975	0.964	1.149	0.996	1.01	0.984	0.986	0.871	1.087	0.968	1.007	0.928	0.42	1.097	1.049	1.053	0.998	2.194
TRUE	High	Master Protein	F1LUT4	Protein Atp8a1 (Fragment) OS=Rattus norvegicus GN=Atp8a1 PE=4 SV=2	0	FALSE	68.065	12	12	90	12	1133	127.8	7.08	310.81	12			metal ion binding;nucleotide binding	Pf00122, Pf13246								0	0	0.963	0.959	1.04	0.931	0.727	0.986	0.888	1.048	0.922	0.643	1.109	1.02	1.114	0.956	0.683	0.943	0.942	1.072	0.974	1.033
TRUE	High	Master Protein	G3V6U3	Asparagine-linked glycosylation 2 homolog (Yeast, alpha-1,3-mannosyltransferase), isoform CRA_a OS=Rattus norvegicus GN=Alg2 PE=4 SV=1	0	FALSE	68.012	24	8	106	8	415	47.3	7.97	407.44	8	metabolic process;response to stimulus	cytoplasm;membrane;nucleus	catalytic activity;protein binding	Pf00534, Pf13439, Pf13524, Pf13579, Pf13692	313231	ENSRNOG00000006369.5	Alg2	5	Metabolic pathways; N-Glycan biosynthesis		Biosynthesis of the N-glycan precursor (dolichol lipid-linked oligosaccharide, LLO) and transfer to a nascent protein	6	0	1.055	1.029	0.962	0.944	1.386	1.009	0.957	0.953	0.945	1.444	1.008	0.902	0.907	0.893	1.416	1.074	0.955	0.966	0.961	0.01
TRUE	High	Master Protein	Q63081	Protein disulfide-isomerase A6 OS=Rattus norvegicus GN=Pdia6 PE=1 SV=2	0	FALSE	67.986	16	7	87	7	440	48.1	5.14	368.38	7	cellular homeostasis;metabolic process;regulation of biological process;response to stimulus;transport	cytosol;endoplasmic reticulum;membrane;organelle lumen	catalytic activity;metal ion binding;protein binding	Pf00085, Pf13098, Pf13848, Pf13899, Pf13905	286906		Pdia6	6	Protein processing in endoplasmic reticulum			1	0	1.017	1.021	1.015	1.018	0.701	1.003	1.028	1.012	1.102	1.678	1.164	1.162	1.021	1.047	0.01	1.024	1.118	1.075	1.076	1.212
TRUE	High	Master Protein	P39069	Adenylate kinase isoenzyme 1 OS=Rattus norvegicus GN=Ak1 PE=1 SV=3	0	FALSE	67.952	28	4	77	4	194	21.6	7.9	313.42	4	cell differentiation;metabolic process;regulation of biological process;response to stimulus	cytoplasm;cytosol;membrane	catalytic activity;nucleotide binding	Pf00406, Pf13207, Pf13238, Pf13671	24183		Ak1	3	Purine metabolism; Thiamine metabolism; Metabolic pathways			3	0	1.008	1.04	1.046	1.111	0.93	0.965	1.208	1.145	1.279	1.202	0.951	1.012	1.043	1.052	0.535	0.923	1.033	1.034	1.095	1.501
TRUE	High	Master Protein	Q6AZ26	C-terminal binding protein 1 OS=Rattus norvegicus GN=Ctbp1 PE=1 SV=1	0	FALSE	67.847	19	9	106	7	391	42.6	6.58	481.97	9	cell differentiation;cell organization and biogenesis;metabolic process;regulation of biological process	cytoplasm;cytosol;nucleus	catalytic activity;nucleotide binding;protein binding	Pf00389, Pf02826	29382		Ctbp1	14		Wnt Signaling Pathway and Pluripotency; Wnt Signaling Pathway NetPath; Notch Signaling Pathway		3	2	0.994	1.065	1.064	0.933	0.508	0.979	1.045	1.019	0.953	1.324	0.941	1.16	0.992	0.965	0.01	0.897	1.111	0.984	0.944	1.097
TRUE	High	Master Protein	Q4V7C7	Actin-related protein 3 OS=Rattus norvegicus GN=Actr3 PE=1 SV=1	0	FALSE	67.794	20	7	129	5	418	47.3	5.88	387.91	7	cell differentiation;cell division;cell organization and biogenesis;cellular component movement;regulation of biological process;response to stimulus	cytoplasm;cytoskeleton;membrane	nucleotide binding;protein binding;structural molecule activity	Pf00022	81732	ENSRNOG00000003206.7	Actr3	13			Regulation of actin dynamics for phagocytic cup formation; RHO GTPases Activate WASPs and WAVEs; Clathrin-mediated endocytosis; EPHB-mediated forward signaling	15	4	1.019	1.12	1.05	1.167	0.428	0.982	1.041	1.027	1.028	1.047	1.066	1.056	0.985	1.018	0.01	1.101	1.106	1.048	1.059	1.384
TRUE	High	Master Protein	O35244	Peroxiredoxin-6 OS=Rattus norvegicus GN=Prdx6 PE=1 SV=3	0	FALSE	67.608	24	5	70	5	224	24.8	5.94	281.94	5	cell organization and biogenesis;cellular homeostasis;metabolic process;regulation of biological process;response to stimulus	cytoplasm;cytosol;membrane;mitochondrion;nucleus;vacuole	antioxidant activity;catalytic activity;protein binding	Pf00578, Pf08534, Pf10417	94167	ENSRNOG00000002896.7	Prdx6	13	Metabolic pathways		Detoxification of Reactive Oxygen Species; Neutrophil degranulation	7	0	1.03	0.902	0.725	0.823	1.089	1.092	1.005	0.867	0.953	1.397	0.969	0.95	1.029	0.962	1.368	0.987	0.967	1.017	1.012	0.662
TRUE	High	Master Protein	F1M0L7	Annexin (Fragment) OS=Rattus norvegicus GN=Anxa3 PE=3 SV=2	0	FALSE	67.58	32	9	55	9	324	36.3	6.35	202.47	9			metal ion binding	Pf00191								0	0	1.015	0.999	0.966	0.968	1.467	0.946	1.074	0.94	0.887	0.922	0.883	1.004	0.952	0.881	0.01	0.919	1.009	0.941	0.861	0.488
TRUE	High	Master Protein	Q9WU70	Syntaxin-binding protein 5 OS=Rattus norvegicus GN=Stxbp5 PE=1 SV=1	0	FALSE	67.374	9	7	49	6	1152	127.6	7.12	227.25	7	regulation of biological process;transport	cytoplasm;cytosol;membrane	enzyme regulator activity;protein binding	Pf00400, Pf00957, Pf08366	81022	ENSRNOG00000013351.8	Stxbp5	1				0	1	1.207	1.063	0.922	0.814	0.01	1.048	1.047	0.97	1.04	0.744	0.989	0.945	0.932	1.034	2.101	0.903	0.957	0.889	1.073	0.01
TRUE	High	Master Protein	O88339	Epsin-1 OS=Rattus norvegicus GN=Epn1 PE=1 SV=1	0	FALSE	67.352	14	5	67	5	575	60.1	4.81	367.5	5	regulation of biological process;response to stimulus;transport	cytoplasm;cytosol;membrane;nucleus	protein binding	Pf01417	117277		Epn1	1	Endocytosis	EGFR1 Signaling Pathway		2	0	1.074	1.031	1.121	1.089	1.387	1.076	0.962	1.005	1.004	0.852	1.092	0.976	1.016	1.192	0.528	1.051	0.934	1.008	1.166	0.01
TRUE	High	Master Protein	M0R8B6	Protein Tubb1 OS=Rattus norvegicus GN=Tubb1 PE=3 SV=1	0	FALSE	67.031	19	8	423	2	452	50.4	5.11	1196.37	8	cell organization and biogenesis	cytoplasm;cytoskeleton	catalytic activity;nucleotide binding;structural molecule activity	Pf00091, Pf03953	679312	ENSRNOG00000046151.2	LOC679312; Tubb1	3	Gap junction; Phagosome		Hedgehog 'on' state; Hedgehog 'off' state; Intraflagellar transport	9	0											1.018	0.999	1.053	1.195	0.01	0.977	0.852	0.914	1.163	2.811
TRUE	High	Master Protein	Q924N5	Long-chain-fatty-acid--CoA ligase ACSBG1 OS=Rattus norvegicus GN=Acsbg1 PE=1 SV=1	0	FALSE	67.003	18	10	48	10	721	80.5	5.92	167.17	10	metabolic process;response to stimulus	cytoplasm;endoplasmic reticulum;Golgi	catalytic activity;nucleotide binding	Pf00501	171410	ENSRNOG00000011381.5	Acsbg1	8	Adipocytokine signaling pathway; Fatty acid metabolism; Metabolic pathways; Fatty acid degradation; PPAR signaling pathway; Fatty acid biosynthesis		Synthesis of very long-chain fatty acyl-CoAs	11	0	1.092	0.967	1.073	1.023	1.082	1.105	0.989	1.112	1.017	0.01	1.086	1.042	1.116	0.988	0.835	1.039	0.965	1.027	1.112	2.14
TRUE	High	Master Protein	G3V9N8	AP-1 complex subunit beta-1 OS=Rattus norvegicus GN=Ap1b1 PE=4 SV=2	0	FALSE	66.931	10	11	88	2	942	103.8	5.17	254.97	11	cell organization and biogenesis;transport	cytoplasm;cytosol;Golgi;membrane	protein binding;transporter activity	Pf01602, Pf02883, Pf09066, Pf12717, Pf13646	29663	ENSRNOG00000008786.7	Ap1b1	14			MHC class II antigen presentation; Golgi Associated Vesicle Biogenesis; Lysosome Vesicle Biogenesis	9	0	1.043	1.014	1.238	1.225	1.808	0.981	1.104	0.982	1	0.01	1.03	1.137	1.096	1.022	0.01	0.945	1.111	1.031	1.028	1.414
TRUE	High	Master Protein	Q561S0	NADH dehydrogenase [ubiquinone] 1 alpha subcomplex subunit 10, mitochondrial OS=Rattus norvegicus GN=Ndufa10 PE=1 SV=1	0	FALSE	66.42	21	5	98	5	355	40.5	7.8	481.74	5	cell organization and biogenesis;metabolic process;response to stimulus;transport	mitochondrion;organelle lumen	catalytic activity	Pf01712	678759; 316632	ENSRNOG00000016470.6	Ndufa10; Ndufa10l1	9; 6	Non-alcoholic fatty liver disease (NAFLD); Oxidative phosphorylation; Huntington's disease; Metabolic pathways; Parkinson's disease; Alzheimer's disease	Oxidative phosphorylation; Electron Transport Chain	Complex I biogenesis	13	0	1.043	0.907	0.986	1.023	1.017	1.053	0.919	1.032	0.993	1.054	0.939	0.844	0.99	1.071	0.546	0.945	0.857	0.978	1.059	0.01
TRUE	High	Master Protein	Q68FQ0	T-complex protein 1 subunit epsilon OS=Rattus norvegicus GN=Cct5 PE=1 SV=1	0	FALSE	66.414	16	6	94	5	541	59.5	5.72	293.52	6	metabolic process;regulation of biological process;response to stimulus;transport	cytoplasm;cytoskeleton;cytosol	nucleotide binding;protein binding;RNA binding	Pf00118	294864	ENSRNOG00000011632.6	Cct5	2			Association of TriC/CCT with target proteins during biosynthesis; Cooperation of PDCL (PhLP1) and TRiC/CCT in G-protein beta folding	5	0	1.049	0.986	0.974	0.956	0.329	1.076	0.968	0.944	0.889	0.423	1.075	0.978	1.008	0.904	0.433	1.076	0.981	1.025	0.949	0.01
TRUE	High	Master Protein	P41499	Tyrosine-protein phosphatase non-receptor type 11 OS=Rattus norvegicus GN=Ptpn11 PE=1 SV=4	0	FALSE	66.36	19	9	50	9	597	68.4	7.28	218.47	9	cell differentiation;cell organization and biogenesis;cellular component movement;metabolic process;regulation of biological process;response to stimulus	cytoplasm;cytosol;mitochondrion;nucleus	catalytic activity;protein binding	Pf00017, Pf00102, Pf00782	25622	ENSRNOG00000030124.5	Ptpn11	12	Ras signaling pathway; Herpes simplex infection; Phospholipase D signaling pathway; Leukocyte transendothelial migration; Renal cell carcinoma; Proteoglycans in cancer; Neurotrophin signaling pathway; Insulin resistance; Jak-STAT signaling pathway; Natural killer cell mediated cytotoxicity; Adipocytokine signaling pathway; Axon guidance; Chronic myeloid leukemia	Type II interferon signaling (IFNG); IL-6 Signaling Pathway; Kit Receptor Signaling Pathway; IL-3 Signaling Pathway; IL-1 Signaling Pathway; Insulin Signaling; IL-5 Signaling Pathway; TNF-alpha NF-kB Signaling Pathway; EGFR1 Signaling Pathway; IL-2 Signaling Pathway; IL-9 Signaling Pathway; Signaling of Hepatocyte Growth Factor Receptor	RET signaling; PI5P, PP2A and IER3 Regulate PI3K/AKT Signaling; GAB1 signalosome; PI-3K cascade:FGFR1; PD-1 signaling; Tie2 Signaling; Spry regulation of FGF signaling; MAPK3 (ERK1) activation; Interleukin-6 family signaling; PI-3K cascade:FGFR2; FRS-mediated FGFR2 signaling; FRS-mediated FGFR3 signaling; FRS-mediated FGFR1 signaling; Signaling by SCF-KIT; GPVI-mediated activation cascade; Regula…	105	0	1.057	1.085	1.088	1.242	0.01	1.001	1.075	1.024	1.101	1.726	1.059	0.983	0.999	1.007	2.137	1.005	1.046	0.975	1.146	1.172
TRUE	High	Master Protein	A1A5L2	Pgm1 protein (Fragment) OS=Rattus norvegicus GN=Pgm1 PE=2 SV=1	0	FALSE	66.321	22	11	38	11	583	63.3	6.4	156.94	11	cellular homeostasis;metabolic process;response to stimulus	cytoplasm;cytoskeleton;cytosol	catalytic activity;metal ion binding	Pf00408, Pf02878, Pf02879, Pf02880	24645		Pgm1	5		Glycogen Metabolism		1	0	0.968	0.939	0.86	0.974	0.01	0.869	0.814	0.804	0.911	0.01	1.14	1.139	1.026	1.059	1.36	0.939	1.197	1.064	1.031	0.01
TRUE	High	Master Protein	E9PT48	Microtubule-associated protein OS=Rattus norvegicus GN=Mapt PE=2 SV=1	0	FALSE	66.149	21	5	57	1	372	38.8	8.65	187.54	5	cell death;cell differentiation;cell growth;cell organization and biogenesis;cellular component movement;metabolic process;regulation of biological process;response to stimulus;transport	cytoplasm;cytoskeleton;cytosol;membrane;nucleus	DNA binding;protein binding	Pf00418	29477		LOC497674; Mapt	10		IL-6 Signaling Pathway; MAPK signaling pathway		2	0
TRUE	High	Master Protein	B2RYJ7	ARP1 actin-related protein 1 homolog B (Yeast) OS=Rattus norvegicus GN=Actr1b PE=2 SV=1	0	FALSE	66.063	25	8	59	5	376	42.3	6.4	224.85	8		cytoplasm;cytoskeleton;membrane	nucleotide binding	Pf00022	316333	ENSRNOG00000016789.6	Actr1b	9			MHC class II antigen presentation; Neutrophil degranulation	5	5	0.907	0.949	1.04	0.981	1.481	0.95	1.005	1.026	1.011	1.219	1.073	1.225	1.075	0.932	1.51	0.896	1.113	1.039	0.962	1.059
TRUE	High	Master Protein	Q5EGY4	Synaptobrevin homolog YKT6 OS=Rattus norvegicus GN=Ykt6 PE=1 SV=1	0	FALSE	66.054	47	6	60	6	198	22.4	6.92	238.97	6	cell organization and biogenesis;transport	cytoplasm;cytosol;endoplasmic reticulum;endosome;Golgi;membrane;mitochondrion	catalytic activity;protein binding	Pf00957, Pf13774	64351	ENSRNOG00000014785.3	Ykt6	14	SNARE interactions in vesicular transport		Intra-Golgi traffic; COPI-mediated anterograde transport	11	0	1.059	1.034	0.934	1.018	0.01	1.077	1.064	0.933	1.017	0.668	0.984	1.091	1.019	1.087	0.01	0.97	1.114	1.072	1.048	0.01
TRUE	High	Master Protein	Q68FR6	Elongation factor 1-gamma OS=Rattus norvegicus GN=Eef1g PE=1 SV=3	0	FALSE	65.956	19	9	130	9	437	50	6.74	478.88	9	metabolic process;response to stimulus	cytoplasm;endoplasmic reticulum;membrane;nucleus	catalytic activity;protein binding;RNA binding	Pf00043, Pf00647, Pf02798, Pf13409, Pf13410, Pf13417, Pf14497	293725	ENSRNOG00000020075.7	Eef1g	1	Legionellosis	Translation Factors	Eukaryotic Translation Elongation	5	0	1.012	1.047	1.018	1.093	1.174	1.012	1.03	1.02	1.077	0.884	0.946	1.047	1.034	1.271	0.924	0.938	1.009	0.993	1.137	0.746
TRUE	High	Master Protein	P53678	AP-3 complex subunit mu-2 OS=Rattus norvegicus GN=Ap3m2 PE=2 SV=1	0	FALSE	65.836	16	4	43	4	418	46.8	7.56	239.89	4	cellular component movement;transport	Golgi;membrane		Pf00928	140667		Ap3m2	16	Lysosome			1	0											0.976	0.887	0.973	1.035	0.536	1.025	0.936	1.016	1.051	1.864
TRUE	High	Master Protein	G3V9Q3	Heterogeneous nuclear ribonucleoprotein H OS=Rattus norvegicus GN=Hnrnph1 PE=4 SV=1	0	FALSE	65.808	21	6	81	2	449	49.2	6.3	350.35	6	metabolic process;regulation of biological process;response to stimulus	cytosol;membrane;nucleus;spliceosomal complex	protein binding;RNA binding	Pf00076, Pf08080, Pf14259	140931	ENSRNOG00000003399.8	Hnrnph1; Hnrph1	10		mRNA processing	FGFR2 alternative splicing; mRNA Splicing - Major Pathway	10	1	0.928	1.016	0.947	0.912	1.213	1.042	0.95	0.955	0.857	1.352	0.873	1.004	1.004	1.024	1.318	0.869	0.978	0.996	0.966	1.332
TRUE	High	Master Protein	F1LRI7	AP2-associated protein kinase 1 OS=Rattus norvegicus GN=Aak1 PE=4 SV=2	0	FALSE	65.525	15	11	69	11	963	103.8	6.6	240.34	11	metabolic process;regulation of biological process;transport		catalytic activity;nucleotide binding;protein binding	Pf00069, Pf07714	500244	ENSRNOG00000018317.6	Aak1	4			Cargo recognition for clathrin-mediated endocytosis	4	0	0.905	1.107	1.069	0.955	0.736	0.99	1.007	1.06	1.022	0.764	0.977	1.038	1.026	0.951	0.79	0.948	1.009	0.981	0.961	0.01
TRUE	High	Master Protein	D3ZQD3	2-oxoglutarate dehydrogenase, mitochondrial OS=Rattus norvegicus GN=Ogdhl PE=4 SV=1	0	FALSE	65.42	11	11	80	7	1029	116.6	6.87	256.56	11	metabolic process	cytosol;mitochondrion	catalytic activity	Pf00676, Pf02779	290566		Ogdhl	16	Metabolic pathways; Carbon metabolism; Lysine degradation; Citrate cycle (TCA cycle); Tryptophan metabolism			5	0											1.125	1.02	0.968	0.932	0.01
TRUE	High	Master Protein	D4A0I5	DnaJ (Hsp40) homolog, subfamily C, member 6 (Predicted) OS=Rattus norvegicus GN=Dnajc6 PE=4 SV=1	0	FALSE	65.241	13	11	60	11	911	99.3	7.43	211.12	11	cell organization and biogenesis;regulation of biological process;transport			Pf00226, Pf10409	313409	ENSRNOG00000052887.1	Dnajc6	5	Endocytosis		Clathrin-mediated endocytosis; Golgi Associated Vesicle Biogenesis; Lysosome Vesicle Biogenesis	8	0	0.766	0.85	0.952	0.665	0.01	0.72	0.932	0.944	0.625	0.01	0.931	1.118	1.055	1.016	0.01	0.985	0.958	0.948	0.94	0.01
TRUE	High	Master Protein	O88989	Malate dehydrogenase, cytoplasmic OS=Rattus norvegicus GN=Mdh1 PE=1 SV=3	0	FALSE	65.216	26	8	194	8	334	36.5	6.58	643.62	8	metabolic process	cytoplasm;cytosol;mitochondrion	catalytic activity;nucleotide binding	Pf00056, Pf02866	24551	ENSRNOG00000008103.7	Mdh1	14	Pyruvate metabolism; Proximal tubule bicarbonate reclamation; Metabolic pathways; Glyoxylate and dicarboxylate metabolism; Cysteine and methionine metabolism; Citrate cycle (TCA cycle); Carbon metabolism	Glycolysis and Gluconeogenesis; TCA Cycle; Hexoses metabolism in proximal tubules	Gluconeogenesis	14	0	1.073	0.964	1.019	0.959	0.839	1.099	0.952	1.025	0.985	0.663	1.042	0.966	1.026	0.918	0.587	1.121	0.965	1.011	0.894	0.444
TRUE	High	Master Protein	P61983	14-3-3 protein gamma OS=Rattus norvegicus GN=Ywhag PE=1 SV=2	0	FALSE	65.183	30	8	289	2	247	28.3	4.89	877.03	8	regulation of biological process;response to stimulus;transport	cytoplasm;membrane	enzyme regulator activity;protein binding;RNA binding	Pf00244	56010	ENSRNOG00000001436.5	Ywhag	12	PI3K-Akt signaling pathway; Hippo signaling pathway; Viral carcinogenesis; Cell cycle; Epstein-Barr virus infection; Oocyte meiosis	Myometrial Relaxation and Contraction Pathways; Calcium Regulation in the Cardiac Cell; Cell cycle; TNF-alpha NF-kB Signaling Pathway	Chk1/Chk2(Cds1) mediated inactivation of Cyclin B:Cdk1 complex; Regulation of PLK1 Activity at G2/M Transition; AURKA Activation by TPX2; Recruitment of mitotic centrosome proteins and complexes; Loss of Nlp from mitotic centrosomes; Anchoring of the basal body to the plasma membrane; TP53 Regulates Metabolic Genes; RHO GTPases activate PKNs; Translocation of GLUT4 to the plasma membrane; Recruit…	47	0	0.731	1.122	0.944	0.68	0.01	0.821	1.105	1.04	0.725	0.01	0.89	1.022	0.969	0.633	0.01	0.786	1.052	0.943	0.612	0.01
TRUE	High	Master Protein	G3V6X7	Proprotein convertase subtilisin/kexin type 1 inhibitor OS=Rattus norvegicus GN=Pcsk1n PE=4 SV=1	0	FALSE	64.629	31	7	89	7	260	27.5	5.59	315.51	7	metabolic process;regulation of biological process;response to stimulus	Golgi	enzyme regulator activity	Pf07259	246333; 103690091; 108348172	ENSRNOG00000007112.7; ENSRNOG00000046021.2	Pcsk1n; LOC100911286; LOC103690091; LOC108348172	X				0	0	0.985	0.966	1.084	1.063	0.695	0.962	0.933	1.051	1.017	0.978	1.03	0.971	1.093	1.099	0.01	1.028	0.961	1.036	1.037	0.01
TRUE	High	Master Protein	G3V7G8	Glycine--tRNA ligase OS=Rattus norvegicus GN=Gars PE=4 SV=1	0	FALSE	64.507	14	10	53	10	728	81.7	6.57	210.61	10	metabolic process	cytoplasm;cytosol;mitochondrion	catalytic activity;nucleotide binding;protein binding	Pf00458, Pf00587, Pf03129	297113	ENSRNOG00000011052.6	Gars	4	Aminoacyl-tRNA biosynthesis			1	0	1.028	0.967	0.965	0.968	0.815	0.949	1.07	0.968	0.878	1.517	0.989	1.034	1.007	0.973	0.01	0.979	1.068	0.984	0.902	0.01
TRUE	High	Master Protein	Q68A21	Transcriptional activator protein Pur-beta OS=Rattus norvegicus GN=Purb PE=1 SV=3	0	FALSE	64.502	27	7	58	6	315	33.4	5.43	281.98	7	cell differentiation;cell proliferation;metabolic process;regulation of biological process	nucleus	DNA binding;protein binding;RNA binding;translation regulator activity	Pf04845	498407		Purb	14				0	1	0.961	1.064	0.978	1.026	0.01	0.948	1.037	0.971	0.994	1.984	0.906	0.97	0.92	1.071	1.496	0.943	0.969	0.954	1.014	0.01
TRUE	High	Master Protein	D3ZCV0	Protein Actn2 OS=Rattus norvegicus GN=Actn2 PE=4 SV=1	0	FALSE	64.434	13	11	94	6	894	103.8	5.45	320.8	11	cell organization and biogenesis;regulation of biological process;response to stimulus	cytoskeleton;membrane	metal ion binding;protein binding	Pf00307, Pf00435, Pf08726, Pf11971, Pf13499, Pf13833	291245	ENSRNOG00000017833.7	Actn2	17	Focal adhesion; Amoebiasis; Tight junction; Leukocyte transendothelial migration; Adherens junction; Systemic lupus erythematosus; Viral carcinogenesis; Arrhythmogenic right ventricular cardiomyopathy (ARVC); Regulation of actin cytoskeleton	Striated Muscle Contraction	RAF/MAP kinase cascade; Striated Muscle Contraction; Interleukin-20 family signaling; CREB phosphorylation through the activation of CaMKII; Platelet degranulation ; Ras activation uopn Ca2+ infux through NMDA receptor; Unblocking of NMDA receptor, glutamate binding and activation	33	0	1.049	0.919	0.936	1.119	0.01	0.992	0.959	0.88	1.042	0.01	1.072	0.918	0.982	1.134	0.01
TRUE	High	Master Protein	P01946	Hemoglobin subunit alpha-1/2 OS=Rattus norvegicus GN=Hba1 PE=1 SV=3	0	FALSE	64.334	57	6	94	5	142	15.3	7.97	354.51	6	cell organization and biogenesis;metabolic process;regulation of biological process;response to stimulus;transport	membrane	antioxidant activity;catalytic activity;metal ion binding;protein binding;transporter activity	Pf00042	25632; 360504	ENSRNOG00000029886.3	Hba-a2; Hba1; Hba2	10	African trypanosomiasis; Malaria		Erythrocytes take up oxygen and release carbon dioxide; Erythrocytes take up carbon dioxide and release oxygen; Scavenging of heme from plasma	9	1	0.873	0.891	1.01	0.967	1.282	0.883	0.871	0.996	0.971	0.838	0.879	0.915	0.947	0.92	2.647	0.836	0.937	0.997	0.9	1.412
TRUE	High	Master Protein	Q8R490	Cadherin 13 OS=Rattus norvegicus GN=Cdh13 PE=2 SV=1	0	FALSE	64.023	9	4	49	4	714	78	5.15	231.41	4	cell organization and biogenesis;cell proliferation;cellular component movement;regulation of biological process;response to stimulus	cytoplasm;extracellular;membrane	metal ion binding;protein binding	Pf00028, Pf08758	192248	ENSRNOG00000014371.8	Cdh13	19			Adherens junctions interactions	4	0	0.833	0.897	1.022	1.078	1.697	0.917	1.014	1.111	1.182	1.485	0.963	1.088	1.057	1.403	0.01	0.938	1.024	1.049	1.25	3.608
TRUE	High	Master Protein	D3ZRX4	Microtubule-associated protein OS=Rattus norvegicus GN=Mapt PE=2 SV=1	0	FALSE	63.966	21	6	64	2	498	51.9	8.97	219.38	6	cell death;cell differentiation;cell growth;cell organization and biogenesis;cellular component movement;metabolic process;regulation of biological process;response to stimulus;transport	cytoplasm;cytoskeleton;cytosol;membrane;nucleus	DNA binding;protein binding	Pf00418	29477		LOC497674; Mapt	10		IL-6 Signaling Pathway; MAPK signaling pathway		2	3	0.975	1.196	0.993	0.895	0.654	0.927	1.238	1.105	0.92	0.01	1.037	1.108	0.994	1.011	0.01	1.085	1.151	1.098	1.025	0.01
TRUE	High	Master Protein	Q6IMY8	Heterogeneous nuclear ribonucleoprotein U OS=Rattus norvegicus GN=Hnrnpu PE=2 SV=1	0	FALSE	63.958	8	7	107	7	798	87.7	6.24	462.42	7	cell differentiation;regulation of biological process;response to stimulus	cell surface;chromosome;membrane;nucleus;spliceosomal complex	DNA binding;nucleotide binding;protein binding;RNA binding	Pf00622, Pf13671	117280	ENSRNOG00000033790.4	Hnrnpu	13	Spliceosome	mRNA processing	mRNA Splicing - Major Pathway	6	0	1.039	0.993	0.986	1.041	1.059	1.072	1.022	0.928	0.964	1.217	1.109	1.099	1.029	1.069	0.771	1.114	1.106	1.038	1.039	1.124
TRUE	High	Master Protein	P32232	Cystathionine beta-synthase OS=Rattus norvegicus GN=Cbs PE=1 SV=3	0	FALSE	63.866	15	6	41	6	561	61.4	6.48	245.26	6	cell communication;metabolic process;regulation of biological process;response to stimulus	cytoplasm;cytosol;nucleus	catalytic activity;metal ion binding;protein binding	Pf00291, Pf00571	24250	ENSRNOG00000029528.6	Cbs	20	Biosynthesis of amino acids; Metabolic pathways; Glycine, serine and threonine metabolism; Cysteine and methionine metabolism	Folic Acid Network	Cysteine formation from homocysteine	9	0	0.926	0.941	0.996	0.968	0.01	0.999	0.908	1	0.918	0.904	0.905	0.932	0.925	0.987	0.01	0.945	0.905	0.949	0.985	1.494
TRUE	High	Master Protein	P21708	Mitogen-activated protein kinase 3 OS=Rattus norvegicus GN=Mapk3 PE=1 SV=5	0	FALSE	63.769	27	9	77	6	380	43.1	6.61	313.34	9	cell communication;cell death;cell differentiation;cell organization and biogenesis;cellular homeostasis;metabolic process;regulation of biological process;response to stimulus;transport	cytoplasm;cytoskeleton;cytosol;endosome;Golgi;membrane;mitochondrion;nucleus	catalytic activity;nucleotide binding;protein binding;signal transducer activity	Pf00069, Pf01636, Pf07714	50689	ENSRNOG00000053583.1	Mapk3	1	Alzheimer's disease; Dorso-ventral axis formation; Melanoma; Endometrial cancer; Adherens junction; HIF-1 signaling pathway; Platinum drug resistance; Toxoplasmosis; Gap junction; Signaling pathways regulating pluripotency of stem cells; cGMP-PKG signaling pathway; Sphingolipid signaling pathway; Natural killer cell mediated cytotoxicity; mTOR signaling pathway; Influenza A; Oocyte meiosis; Focal…	Hypothetical Network for Drug Addiction; EPO Receptor Signaling; Toll-like receptor signaling pathway; Signal Transduction of S1P; IL-6 Signaling Pathway; VEGFR-3 signaling; Delta-Notch Signaling Pathway; NFE2L2; Spinal Cord Injury; IL-3 Signaling Pathway; Regulation of Actin Cytoskeleton; IL-1 Signaling Pathway; MAPK signaling pathway; Wnt Signaling Pathway NetPath; Renin - Angiotensin System; I…	Signaling by GPCR; Golgi Cisternae Pericentriolar Stack Reorganization; PI5P, PP2A and IER3 Regulate PI3K/AKT Signaling; Oxidative Stress Induced Senescence; Senescence-Associated Secretory Phenotype (SASP); Oncogene Induced Senescence; Spry regulation of FGF signaling; MAPK3 (ERK1) activation; Thrombin signalling through proteinase activated receptors (PARs); RHO GTPases Activate WASPs and WAVEs…	208	0	0.976	0.993	0.958	1.2	1.989	1.072	0.975	1.061	1.109	0.674	0.921	0.905	1.03	1.211	2.699	0.98	0.942	1.011	1.098	0.01
TRUE	High	Master Protein	Q8VHS9	L-type calcium channel alpha2/delta subunit OS=Rattus norvegicus GN=Cacna2d1 PE=2 SV=1	0	FALSE	63.753	9	9	97	8	1079	122.1	5.17	389.91	9	cellular homeostasis;regulation of biological process;transport	endoplasmic reticulum	metal ion binding;protein binding;transporter activity	Pf00092, Pf02743, Pf08399, Pf08473, Pf13519, Pf13768	25399		Cacna2d1	4	Hypertrophic cardiomyopathy (HCM); Adrenergic signaling in cardiomyocytes; Dilated cardiomyopathy; Oxytocin signaling pathway; Cardiac muscle contraction; Arrhythmogenic right ventricular cardiomyopathy (ARVC); MAPK signaling pathway			7	1	0.977	1.028	1.031	1.043	0.731	0.986	0.991	1.034	1.019	1.01	0.915	1.029	1.078	1.095	0.712	0.907	1.004	1.07	1.073	1.217
TRUE	High	Master Protein	P62142	Serine/threonine-protein phosphatase PP1-beta catalytic subunit OS=Rattus norvegicus GN=Ppp1cb PE=1 SV=3	0	FALSE	63.455	25	8	65	4	327	37.2	6.19	240.16	8	cell division;metabolic process;regulation of biological process;response to stimulus	cytoplasm;cytosol;nucleus	catalytic activity;metal ion binding;protein binding	Pf00149	25594	ENSRNOG00000004612.4	Ppp1cb	6	Oocyte meiosis; Focal adhesion; Oxytocin signaling pathway; Long-term potentiation; Amphetamine addiction; Regulation of actin cytoskeleton; Adrenergic signaling in cardiomyocytes; Hippo signaling pathway; Inflammatory mediator regulation of TRP channels; Insulin resistance; Herpes simplex infection; Insulin signaling pathway; Platelet activation; cGMP-PKG signaling pathway; cAMP signaling pathwa…	G13 Signaling Pathway	RHO GTPases activate PAKs; Regulation of PLK1 Activity at G2/M Transition; RHO GTPases activate PKNs	31	5	1.02	1.005	0.975	1.016	0.771	1.031	0.987	1.011	1.058	1.04	1.046	0.961	1.028	1.016	1.647	1.019	1.011	0.994	0.974	2.351
TRUE	High	Master Protein	P70600	Protein-tyrosine kinase 2-beta OS=Rattus norvegicus GN=Ptk2b PE=1 SV=1	0	FALSE	63.335	15	11	48	10	1009	115.7	6.33	170.4	11	cell differentiation;cell organization and biogenesis;cell proliferation;cellular component movement;cellular homeostasis;defense response;metabolic process;regulation of biological process;response to stimulus	cytoplasm;cytoskeleton;membrane;nucleus	catalytic activity;nucleotide binding;protein binding;receptor activity;signal transducer activity;transporter activity	Pf00069, Pf00373, Pf03623, Pf07714	50646	ENSRNOG00000027839.6	Ptk2b	15	Phospholipase D signaling pathway; Hepatitis B; Leukocyte transendothelial migration; GnRH signaling pathway; Chemokine signaling pathway; Natural killer cell mediated cytotoxicity; Calcium signaling pathway	IL-6 Signaling Pathway; IL-5 Signaling Pathway; EGFR1 Signaling Pathway; IL-2 Signaling Pathway; Signaling of Hepatocyte Growth Factor Receptor	VEGFA-VEGFR2 Pathway; Interleukin-7 signaling; Signal regulatory protein family interactions; Interleukin-2 family signaling	23	1	0.812	0.982	1.03	1.017	1.753	1.082	1.138	0.99	0.9	1.931	0.911	0.96	0.907	0.999	1.306	1.001	1.058	1.02	0.983	1.272
TRUE	High	Master Protein	Q02563	Synaptic vesicle glycoprotein 2A OS=Rattus norvegicus GN=Sv2a PE=1 SV=2	0	FALSE	63.096	15	9	63	9	742	82.6	5.57	216.97	9	cellular homeostasis;regulation of biological process;transport	endoplasmic reticulum;membrane	protein binding;receptor activity;transporter activity	Pf00083, Pf07690, Pf13599	117559	ENSRNOG00000021182.5	Sv2a	2	ECM-receptor interaction			1	0	0.809	0.859	0.902	1.167	0.832	0.883	1.077	1.097	0.945	0.539	0.846	0.851	1.025	1.328	1.291	0.875	0.902	1.037	1.333	1.277
TRUE	High	Master Protein	P84083	ADP-ribosylation factor 5 OS=Rattus norvegicus GN=Arf5 PE=1 SV=2	0	FALSE	63.011	27	6	101	1	180	20.5	6.79	493.98	6	regulation of biological process;response to stimulus;transport	cytoplasm;Golgi;membrane	catalytic activity;nucleotide binding;protein binding;signal transducer activity	Pf00025, Pf00071, Pf00503, Pf01926, Pf04670, Pf08477, Pf09439	79117	ENSRNOG00000007806.2	Arf5	4	Endocytosis			1	0	1.022	1.197	0.836	1.106	0.01	1.155	1.246	0.976	1.187	0.01	1.078	1.22	1.073	1.182	0.01	1.195	1.264	1.122	1.247	0.01
TRUE	High	Master Protein	Q64548	Reticulon-1 OS=Rattus norvegicus GN=Rtn1 PE=2 SV=1	0	FALSE	62.813	10	5	67	1	777	83	4.61	280.19	5	cell differentiation	endoplasmic reticulum;membrane		Pf02453	116644		Rtn1	6				0	0
TRUE	High	Master Protein	M0RBF1	Complement C3 OS=Rattus norvegicus GN=C3 PE=4 SV=1	0	FALSE	62.665	9	13	52	13	1663	186.2	6.47	174.52	13	cell organization and biogenesis;coagulation;defense response;metabolic process;regulation of biological process;response to stimulus	extracellular	enzyme regulator activity;protein binding	Pf00207, Pf01759, Pf01821, Pf01835, Pf07677, Pf07678, Pf07703, Pf10569, Pf11974	24232	ENSRNOG00000046834.3	C3	9	Herpes simplex infection; Staphylococcus aureus infection; Chagas disease (American trypanosomiasis); Complement and coagulation cascades; Pertussis; Systemic lupus erythematosus; Phagosome; Viral carcinogenesis; Leishmaniasis; Tuberculosis; Legionellosis	Complement and Coagulation Cascades; Complement Activation, Classical Pathway	Activation of C3 and C5; Peptide ligand-binding receptors; Post-translational protein phosphorylation; Regulation of Complement cascade; Immunoregulatory interactions between a Lymphoid and a non-Lymphoid cell; Neutrophil degranulation; Regulation of Insulin-like Growth Factor (IGF) transport and uptake by Insulin-like Growth Factor Binding Proteins (IGFBPs); Alternative complement activation; G …	34	0	0.901	1.16	0.972	0.875	0.01	0.946	1.142	1.152	0.951	1.456	0.846	1.081	1.087	1.04	0.01	0.873	0.834	0.968	1.22	3.996
TRUE	High	Master Protein	P39052	Dynamin-2 OS=Rattus norvegicus GN=Dnm2 PE=1 SV=1	0	FALSE	62.559	11	12	161	3	870	98.2	7.43	478.2	12	cell organization and biogenesis;metabolic process;regulation of biological process;response to stimulus;transport	cytoplasm;cytoskeleton;cytosol;endosome;Golgi;membrane;nucleus	catalytic activity;nucleotide binding;protein binding	Pf00169, Pf00350, Pf01031, Pf02212	25751	ENSRNOG00000007649.8	Dnm2	8	Synaptic vesicle cycle; Endocytosis; Fc gamma R-mediated phagocytosis; Endocrine and other factor-regulated calcium reabsorption; Phospholipase D signaling pathway; Bacterial invasion of epithelial cells	Angiotensin signaling in thick ascending limbs; IL-5 Signaling Pathway	MHC class II antigen presentation; Clathrin-mediated endocytosis; Golgi Associated Vesicle Biogenesis; Lysosome Vesicle Biogenesis; NOSTRIN mediated eNOS trafficking	22	0
TRUE	High	Master Protein	P68511	14-3-3 protein eta OS=Rattus norvegicus GN=Ywhah PE=1 SV=2	0	FALSE	62.477	33	9	281	2	246	28.2	4.89	832.14	9	metabolic process;regulation of biological process;response to stimulus;transport	cytoplasm;membrane	protein binding	Pf00244	25576	ENSRNOG00000055471.1	Ywhah	14	Oocyte meiosis; PI3K-Akt signaling pathway; Viral carcinogenesis; Hippo signaling pathway; Cell cycle; Epstein-Barr virus infection	Myometrial Relaxation and Contraction Pathways; Calcium Regulation in the Cardiac Cell; TNF-alpha NF-kB Signaling Pathway; Alpha6-Beta4 Integrin Signaling Pathway	TP53 Regulates Metabolic Genes; Chk1/Chk2(Cds1) mediated inactivation of Cyclin B:Cdk1 complex; RHO GTPases activate PKNs; Translocation of GLUT4 to the plasma membrane; Activation of BAD and translocation to mitochondria	32	2	0.841	1.095	0.874	0.673	0.01	0.841	1.058	0.973	0.66	0.01	0.766	0.925	0.92	0.685	0.731	0.779	0.889	0.915	0.706	0.01
TRUE	High	Master Protein	Q66X93	Staphylococcal nuclease domain-containing protein 1 OS=Rattus norvegicus GN=Snd1 PE=2 SV=1	0	FALSE	62.365	12	9	40	9	909	101.9	7.18	131.6	9	cell differentiation;metabolic process;regulation of biological process	cytoplasm;cytosol;membrane;mitochondrion;nucleus	catalytic activity;protein binding;RNA binding	Pf00565, Pf00567	64635	ENSRNOG00000031173.6	Snd1	4	Viral carcinogenesis; Epstein-Barr virus infection			2	0	1.056	0.977	0.984	1.232	1.088	1.022	1.023	0.938	1.35	1.546	1.017	1.004	1.043	1.168	1.449	1.071	1.061	1.029	1.168	1.599
TRUE	High	Master Protein	P62138	Serine/threonine-protein phosphatase PP1-alpha catalytic subunit OS=Rattus norvegicus GN=Ppp1ca PE=1 SV=1	0	FALSE	62.355	27	8	63	3	330	37.5	6.33	252.76	8	cell division;metabolic process;regulation of biological process;response to stimulus	cytoplasm;cytosol;membrane;nucleus	catalytic activity;metal ion binding;protein binding	Pf00149	24668	ENSRNOG00000018708.6	Ppp1ca	1	Adrenergic signaling in cardiomyocytes; Hippo signaling pathway; cGMP-PKG signaling pathway; Insulin resistance; cAMP signaling pathway; Herpes simplex infection; Insulin signaling pathway; Vascular smooth muscle contraction; Platelet activation; mRNA surveillance pathway; Proteoglycans in cancer; Alcoholism; Dopaminergic synapse; Oocyte meiosis; Oxytocin signaling pathway; Long-term potentiation…		Signaling by GPCR; DARPP-32 events	24	1											0.867	1.041	1.008	1.033	1.891	0.906	1.058	1.015	1.065	1.025
TRUE	High	Master Protein	G3V852	Protein Tln1 OS=Rattus norvegicus GN=Tln1 PE=4 SV=1	0	FALSE	62.286	5	10	34	7	2541	269.5	6.2	134.23	10	cell organization and biogenesis;regulation of biological process;response to stimulus	cytoskeleton	protein binding;structural molecule activity	Pf00373, Pf01608, Pf02174, Pf08913, Pf09141, Pf09379	313494	ENSRNOG00000016630.6	Tln1	5	Rap1 signaling pathway; Platelet activation; Focal adhesion; HTLV-I infection	Focal Adhesion; Integrin-mediated cell adhesion	Platelet degranulation ; p130Cas linkage to MAPK signaling for integrins; GRB2:SOS provides linkage to MAPK signaling for Integrins ; Smooth Muscle Contraction; SEMA3A-Plexin repulsion signaling by inhibiting Integrin adhesion	22	0	1.096	2.343	0.893	0.995	0.01	0.985	1.274	0.941	1.026	0.894	1.018	1.628	1.048	0.956	2.172	1.091	1.721	1.061	0.99	0.01
TRUE	High	Master Protein	F1LPP0	Protein LOC100909679 (Fragment) OS=Rattus norvegicus GN=Amph PE=4 SV=2	0	FALSE	61.911	16	7	95	6	657	71.8	4.56	393.22	7		cytoplasm	protein binding	Pf00018, Pf03114, Pf14604								0	1	0.945	1.009	1.029	0.98	0.895	0.949	0.976	0.98	0.921	1.37	0.92	0.931	0.952	0.944	0.871	0.989	0.978	0.97	0.96	1.153
TRUE	High	Master Protein	Q5U2N3	Membrane-associated phosphatidylinositol transfer protein 1 OS=Rattus norvegicus GN=Pitpnm1 PE=2 SV=1	0	FALSE	61.773	8	8	89	8	1242	134.9	5.96	351.85	8	transport	cytoplasm;cytosol;endoplasmic reticulum;Golgi;membrane	metal ion binding;transporter activity	Pf02121, Pf02862, Pf08235	361694	ENSRNOG00000018553.4	Pitpnm1	1			Synthesis of PI	5	0	1.026	1.099	1.019	1.035	0.371	1.067	1.117	1.025	1.083	0.378	1.031	1.15	1.035	1.086	1.674	1.02	1.139	1.013	1.049	1.418
TRUE	High	Master Protein	Q6RKB3	Fasciclin II transmembrane protein isoform OS=Rattus norvegicus GN=Ncam2 PE=2 SV=1	0	FALSE	61.743	12	8	43	8	837	93.1	5.88	168.28	8		membrane	protein binding	Pf00041, Pf00047, Pf07679, Pf07686, Pf13895, Pf13927	288280		Ncam2	11	Prion diseases; Cell adhesion molecules (CAMs)			2	0						1.192	1.026	1.033	1.178	0.806	1.056	1.163	1.157	1.416	2.3	1.065	1.091	1.122	1.4	3.62
TRUE	High	Master Protein	P19490	Glutamate receptor 1 OS=Rattus norvegicus GN=Gria1 PE=1 SV=2	0	FALSE	61.63	16	12	46	10	907	101.5	7.53	158.31	12	cell communication;metabolic process;regulation of biological process;response to stimulus;transport	cell surface;cytosol;endoplasmic reticulum;endosome;membrane	protein binding;receptor activity;signal transducer activity;transporter activity	Pf00060, Pf00497, Pf01094, Pf10613	50592		Gria1	10	Circadian entrainment; Glutamatergic synapse; Long-term potentiation; Amyotrophic lateral sclerosis (ALS); Retrograde endocannabinoid signaling; Neuroactive ligand-receptor interaction; Dopaminergic synapse; cAMP signaling pathway; Amphetamine addiction; Nicotine addiction; Long-term depression	Hypothetical Network for Drug Addiction		12	3	1.035	0.869	0.915	0.864	0.01	1.011	0.892	0.866	0.912	0.683	0.784	1.035	0.885	0.74	0.01	0.934	1.001	0.96	0.842	0.01
TRUE	High	Master Protein	F1M5B8	Protein Astn1 OS=Rattus norvegicus GN=Astn1 PE=4 SV=2	0	FALSE	61.446	7	6	51	6	1291	143.4	5.24	234.97	6				Pf14670								0	0	1.079	1.019	1.057	0.989	0.997	1.031	0.955	1.012	0.967	0.867	1.047	1.023	1.064	1.007	2.071	1.026	0.981	1.033	0.972	1.634
TRUE	High	Master Protein	Q56R17	Importin subunit alpha OS=Rattus norvegicus GN=Kpna4 PE=2 SV=1	0	FALSE	61.317	20	6	42	3	521	57.9	4.94	184.91	6	response to stimulus;transport	cytoplasm;cytosol;nucleus	protein binding;transporter activity	Pf00514, Pf01602, Pf01749, Pf13513, Pf13646	361959	ENSRNOG00000010768.6	Kpna4	2				0	3	1.018	0.999	1.028	1.058	1.512	0.986	1.039	1.091	1.163	1.702	1.166	1.05	0.976	0.931	1.559	1.298	1.096	1.048	1.047	0.01
TRUE	High	Master Protein	Q9JI66	Electrogenic sodium bicarbonate cotransporter 1 OS=Rattus norvegicus GN=Slc4a4 PE=1 SV=1	0	FALSE	61.309	6	6	70	5	1079	121.3	6.86	297.71	6	cellular homeostasis;transport	membrane	protein binding;transporter activity	Pf00359, Pf00955, Pf07565	84484	ENSRNOG00000003134.4	Slc4a4	14	Proximal tubule bicarbonate reclamation; Bile secretion; Pancreatic secretion	Proximal Tubule Transporters	Bicarbonate transporters	8	0	1.124	1.054	0.952	1.163	1.395	1.185	1.092	0.944	1.107	1.626	1.139	1.013	1.051	1.175	1.522	1.235	1.028	1.033	1.244	0.663
TRUE	High	Master Protein	P0C5X8	Protein tweety homolog 1 OS=Rattus norvegicus GN=Ttyh1 PE=3 SV=1	0	FALSE	61.26	18	8	89	8	450	49	4.98	355.36	8	cell organization and biogenesis;regulation of biological process;transport	membrane	metal ion binding;transporter activity	Pf04906	292597	ENSRNOG00000032699.5	Ttyh1	1			Stimuli-sensing channels	3	0	1.112	1.017	1.011	0.98	1.07	1.085	1.047	1.028	1.016	0.841	0.979	1.099	1.076	0.999	1.371	1.079	1.031	1.019	0.976	0.351
TRUE	High	Master Protein	Q6AY48	Poly(RC) binding protein 3 OS=Rattus norvegicus GN=Pcbp3 PE=2 SV=1	0	FALSE	61.042	16	3	51	1	319	33.8	8.51	248.99	3	regulation of biological process	cytosol;nucleus	DNA binding;RNA binding	Pf00013, Pf13014	294336	ENSRNOG00000001245.5	Pcbp3	20				0	0
TRUE	High	Master Protein	Q5XIL1	ATPase, H+ transporting, lysosomal V1 subunit H OS=Rattus norvegicus GN=Atp6v1h PE=2 SV=1	0	FALSE	60.911	20	6	114	6	441	50.8	6.68	397.54	6	cellular homeostasis;transport	membrane	catalytic activity;transporter activity	Pf01602, Pf03224, Pf11698	297797		Atp6v1h	5	Metabolic pathways; Synaptic vesicle cycle; Phagosome; Oxidative phosphorylation; Lysosome; Rheumatoid arthritis; Tuberculosis; mTOR signaling pathway	Proximal Tubule Transporters		9	0	1.075	1.004	1.002	0.973	0.888	1.017	0.947	1.011	0.957	0.62	1.087	1.014	1.069	0.998	0.844	0.987	0.994	1.026	0.989	0.01
TRUE	High	Master Protein	Q6AYS2	RCG24191 OS=Rattus norvegicus GN=Sfxn1 PE=2 SV=1	0	FALSE	60.735	26	8	69	7	322	35.6	9.07	222.95	8	cell differentiation;transport	membrane;mitochondrion	transporter activity	Pf03820	364678	ENSRNOG00000018279.7	Sfxn1	17				0	0	1.055	1.294	1.091	1.099	0.01	1.01	1.056	1.002	1.084	0.457	0.95	1.08	1	1.134	0.813	1.035	1.143	1.071	1.046	0.01
TRUE	High	Master Protein	P61751	ADP-ribosylation factor 4 OS=Rattus norvegicus GN=Arf4 PE=2 SV=2	0	FALSE	60.717	22	5	104	1	180	20.4	7.14	497	5	cellular component movement;metabolic process;regulation of biological process;response to stimulus;transport	cytoplasm;cytosol;Golgi;membrane	catalytic activity;nucleotide binding;protein binding;signal transducer activity	Pf00025, Pf00071, Pf00503, Pf04670, Pf08477, Pf09439	79120	ENSRNOG00000012623.5	Arf4	16		EGFR1 Signaling Pathway	VxPx cargo-targeting to cilium; COPI-dependent Golgi-to-ER retrograde traffic; COPI-mediated anterograde transport	16	0	1.022	1.173	1.032	1.126	0.01	1.079	1.119	1.074	1.095	1.186	1.093	1.203	1.016	1.133	0.01	1.093	1.207	1.032	1.126	0.01
TRUE	High	Master Protein	D4AE00	Protein Ap3b2 OS=Rattus norvegicus GN=Ap3b2 PE=4 SV=1	0	FALSE	60.548	14	14	48	13	1082	119.1	5.63	148.87	14	cellular component movement;transport	cytoplasm;membrane		Pf01602, Pf12717, Pf13646, Pf14796	308777	ENSRNOG00000019249.7	Ap3b2	1	Lysosome			1	1	1.094	1.08	1.045	1.011	1.117	1.072	1.13	1.284	1.084	2.403	1.251	1.146	0.948	0.869	1.055	0.955	1.073	1.006	0.933	2.851
TRUE	High	Master Protein	P62909	40S ribosomal protein S3 OS=Rattus norvegicus GN=Rps3 PE=1 SV=1	0	FALSE	60.394	33	7	110	7	243	26.7	9.66	389.66	7	cell death;cell division;cell organization and biogenesis;metabolic process;regulation of biological process;response to stimulus	cytoplasm;cytoskeleton;cytosol;endoplasmic reticulum;membrane;mitochondrion;nucleus;organelle lumen;ribosome	catalytic activity;DNA binding;protein binding;RNA binding;structural molecule activity	Pf00189, Pf07650	140654	ENSRNOG00000017418.5	Rps3	1	Ribosome	Cytoplasmic Ribosomal Proteins	SRP-dependent cotranslational protein targeting to membrane; Formation of a pool of free 40S subunits; Translation initiation complex formation; Major pathway of rRNA processing in the nucleolus and cytosol; GTP hydrolysis and joining of the 60S ribosomal subunit; Formation of the ternary complex, and subsequently, the 43S complex; Ribosomal scanning and start codon recognition; Nonsense Mediated…	21	0	0.992	1.017	1.096	1.153	0.795	1.022	1.017	1.07	1.171	1.552	1.116	0.998	1.054	1.116	0.608	1.048	0.975	1.047	1.14	1.51
TRUE	High	Master Protein	G3V7J0	Aldehyde dehydrogenase family 6, subfamily A1, isoform CRA_b OS=Rattus norvegicus GN=Aldh6a1 PE=3 SV=1	0	FALSE	60.272	15	6	65	6	535	57.7	8.18	272.12	6	cell differentiation;metabolic process	mitochondrion	catalytic activity;RNA binding	Pf00171	81708	ENSRNOG00000011419.4	Aldh6a1	6	Propanoate metabolism; Metabolic pathways; beta-Alanine metabolism; Valine, leucine and isoleucine degradation; Inositol phosphate metabolism; Carbon metabolism		Branched-chain amino acid catabolism	9	0	0.994	0.928	0.982	0.957	1.135	1.004	1.043	1.003	0.934	1.34	1.024	1.03	1.06	1.016	2.002	1.011	0.969	1.028	1.005	0.604
TRUE	High	Master Protein	P10824	Guanine nucleotide-binding protein G(i) subunit alpha-1 OS=Rattus norvegicus GN=Gnai1 PE=1 SV=3	0	FALSE	60.253	23	7	72	4	354	40.3	5.97	291.32	7	cell division;cell organization and biogenesis;regulation of biological process;response to stimulus;transport	cytoplasm;cytoskeleton;membrane;nucleus	catalytic activity;enzyme regulator activity;metal ion binding;nucleotide binding;protein binding;signal transducer activity	Pf00025, Pf00503	25686	ENSRNOG00000057096.1	Gnai1	4	cAMP signaling pathway; Serotonergic synapse; Morphine addiction; GABAergic synapse; Adrenergic signaling in cardiomyocytes; Pathways in cancer; Tight junction; Progesterone-mediated oocyte maturation; Dopaminergic synapse; Rap1 signaling pathway; Circadian entrainment; Gap junction; Leukocyte transendothelial migration; Sphingolipid signaling pathway; Cholinergic synapse; Glutamatergic synapse; …	Signal Transduction of S1P; Calcium Regulation in the Cardiac Cell; G Protein Signaling Pathways	ADP signalling through P2Y purinoceptor 12; Adenylate cyclase inhibitory pathway; Cooperation of PDCL (PhLP1) and TRiC/CCT in G-protein beta folding; G-protein activation; Adrenaline,noradrenaline inhibits insulin secretion; PLC beta mediated events	65	0	0.96	0.964	1.13	1.003	1.655	0.937	0.953	1.226	0.995	1.414	0.91	1.041	1.028	0.916	1.471	0.893	0.979	0.972	0.903	1.536
TRUE	High	Master Protein	P80254	D-dopachrome decarboxylase OS=Rattus norvegicus GN=Ddt PE=1 SV=3	0	FALSE	59.85	42	4	66	4	118	13.1	6.54	229.7	4	defense response;metabolic process;regulation of biological process;response to stimulus	cytoplasm	catalytic activity;protein binding	Pf01187	29318	ENSRNOG00000001239.6	Ddt	20				0	0	0.982	1.121	0.974	1.028	0.01	0.962	1.089	0.99	1.133	1.059	1.008	0.943	0.973	1.158	0.01	0.978	0.992	0.985	1.138	1.425
TRUE	High	Master Protein	M0R739	Protein Adam22 OS=Rattus norvegicus GN=Adam22 PE=4 SV=1	0	FALSE	59.759	9	6	75	6	884	98.3	7.77	306.64	6	metabolic process		catalytic activity	Pf00200, Pf01421, Pf01562, Pf08516, Pf13582, Pf13583, Pf13688								0	0	0.981	0.965	0.958	1.071	1.136	0.969	0.931	0.988	1.05	0.668	1.122	1.026	1.081	1.03	1.599	1.138	1.025	0.875	0.956	0.01
TRUE	High	Master Protein	D3ZDU5	Profilin OS=Rattus norvegicus GN=Pfn2 PE=3 SV=1	0	FALSE	59.746	20	3	95	3	148	16	7.97	323.82	3	cell organization and biogenesis;regulation of biological process		catalytic activity;protein binding	Pf00235		ENSRNOG00000017427.8		2				0	0	0.945	1	0.972	0.972	0.496	1.012	1.008	0.965	1.024	0.622	1.086	0.913	0.886	1.04	0.513	1.105	0.951	0.924	1.087	0.617
TRUE	High	Master Protein	G3V8Q6	Protein kinase, cAMP-dependent, regulatory, type 2, alpha, isoform CRA_a OS=Rattus norvegicus GN=Prkar2a PE=4 SV=1	0	FALSE	59.605	16	5	103	4	401	45.5	4.93	430.02	5	cell organization and biogenesis;regulation of biological process;response to stimulus	cytoplasm;membrane	enzyme regulator activity;nucleotide binding;protein binding	Pf00027, Pf02197, Pf05758	29699	ENSRNOG00000020284.7	Prkar2a	8		Myometrial Relaxation and Contraction Pathways; Calcium Regulation in the Cardiac Cell; G Protein Signaling Pathways	Signaling by GPCR; Vasopressin regulates renal water homeostasis via Aquaporins; Factors involved in megakaryocyte development and platelet production; PKA activation in glucagon signalling; Hedgehog 'off' state; PKA activation; DARPP-32 events	27	0	1.097	1.016	1.005	1.009	0.902	1.059	0.983	1.01	1.036	1.517	0.95	1.002	1.098	1.146	1.762	0.988	0.941	1.093	1.126	0.01
TRUE	High	Master Protein	Q62717	Calcium-dependent secretion activator 1 OS=Rattus norvegicus GN=Cadps PE=1 SV=1	0	FALSE	59.433	8	10	100	1	1289	146.2	5.82	385.76	10	cell organization and biogenesis;regulation of biological process;transport	membrane	metal ion binding;protein binding	Pf00169, Pf06292	26989		Cadps	15				0	0
TRUE	High	Master Protein	Q7TMC7	Ab2-417 OS=Rattus norvegicus GN=Tf PE=2 SV=1	0	FALSE	59.369	10	8	148	8	979	107.3	8	487.59	8	regulation of biological process;response to stimulus	cytoplasm;extracellular;membrane	nucleotide binding;protein binding	Pf00009, Pf00025, Pf00405, Pf01926, Pf09439, Pf12974	300965		Srprb	8				0	0	0.961	1.016	1.037	0.913	0.26	0.964	1.032	1.055	0.923	0.267	0.938	0.974	1.042	0.885	0.329	0.938	1.003	1.021	0.936	0.896
TRUE	High	Master Protein	Q6AYI1	DEAD (Asp-Glu-Ala-Asp) box polypeptide 5 OS=Rattus norvegicus GN=Ddx5 PE=1 SV=1	0	FALSE	59.209	18	9	64	6	615	69.2	8.92	243.72	9	cell differentiation;cell organization and biogenesis;metabolic process;regulation of biological process;response to stimulus	cytoplasm;membrane;nucleus;spliceosomal complex	catalytic activity;nucleotide binding;protein binding;RNA binding	Pf00270, Pf00271, Pf08061	287765	ENSRNOG00000030680.4	Ddx5	10	Spliceosome; Transcriptional misregulation in cancer; Proteoglycans in cancer		mRNA Splicing - Major Pathway	7	3	1.045	1.091	1.091	0.976	1.693	0.991	1.133	1.017	0.938	1.442	1.155	1.113	1.044	0.99	1.168	1.031	1.024	0.995	0.98	1.395
TRUE	High	Master Protein	P04631	Protein S100-B OS=Rattus norvegicus GN=S100b PE=1 SV=2	0	FALSE	59.165	16	1	134	1	92	10.7	4.55	677.38	1	cell differentiation;regulation of biological process;response to stimulus	cytoplasm;nucleus	metal ion binding;protein binding	Pf01023	25742	ENSRNOG00000001295.2	S100b	20			Interleukin-1 family signaling; RIP-mediated NFkB activation via ZBP1; TAK1 activates NFkB by phosphorylation and activation of IKKs complex; Activated TLR4 signalling; DEx/H-box helicases activate type I IFN and inflammatory cytokines production ; Advanced glycosylation endproduct receptor signaling; TRAF6 mediated NF-kB activation	30	0	1.006	0.957	1.006	0.855	0.918	0.973	0.975	1.086	0.847	0.721	0.943	0.939	1.102	0.88	2.921	0.933	0.952	1.078	0.834	2.82
TRUE	High	Master Protein	P35213	14-3-3 protein beta/alpha OS=Rattus norvegicus GN=Ywhab PE=1 SV=3	0	FALSE	59.082	33	9	277	2	246	28	4.88	802.66	9	cell organization and biogenesis;regulation of biological process;transport	cytoplasm;cytosol;membrane;nucleus	protein binding	Pf00244	56011	ENSRNOG00000010945.6	Ywhab	3	Viral carcinogenesis; PI3K-Akt signaling pathway; Oocyte meiosis; Hepatitis B; Hippo signaling pathway; Cell cycle; Epstein-Barr virus infection	Myometrial Relaxation and Contraction Pathways; IL-3 Signaling Pathway; Calcium Regulation in the Cardiac Cell; TNF-alpha NF-kB Signaling Pathway; Alpha6-Beta4 Integrin Signaling Pathway; EGFR1 Signaling Pathway	Chk1/Chk2(Cds1) mediated inactivation of Cyclin B:Cdk1 complex; Signaling by Hippo; mTORC1-mediated signalling; TP53 Regulates Metabolic Genes; MAP2K and MAPK activation; RAF activation; RHO GTPases activate PKNs; Rap1 signalling; Translocation of GLUT4 to the plasma membrane; Butyrate Response Factor 1 (BRF1) binds and destabilizes mRNA; Negative regulation of MAPK pathway; Interleukin-20 family…	53	0	0.79	1.056	1.021	0.739	0.01	0.689	1.156	0.946	0.649	0.01	0.642	1.09	1.025	0.482	0.01	0.901	1.163	1.229	0.816	0.01
TRUE	High	Master Protein	Q5U322	Carboxypeptidase E OS=Rattus norvegicus GN=Cpe PE=2 SV=1	0	FALSE	59.027	24	9	60	9	476	53.2	5.19	187.41	9	cell organization and biogenesis;metabolic process;regulation of biological process;response to stimulus	extracellular;Golgi;membrane	catalytic activity;metal ion binding;protein binding	Pf00246, Pf13620, Pf13715	25669		Cpe	16				0	0	0.957	1.273	1.043	0.85	0.01	0.975	1.141	0.966	0.813	0.01	0.913	1.05	1	1.015	0.01	0.963	1.141	1.057	1.013	0.01
TRUE	High	Master Protein	D4A8L9	Protein Btbd17 OS=Rattus norvegicus GN=Btbd17 PE=4 SV=1	0	FALSE	58.954	22	6	58	6	507	55.4	9.31	262.77	6			protein binding	Pf00651, Pf07707	303660	ENSRNOG00000003109.3	Btbd17	10				0	0	1.065	0.858	0.867	0.804	0.477	0.996	0.885	0.891	0.867	0.434	1.018	0.83	0.953	0.881	0.01	0.944	0.882	0.947	1.101	0.804
TRUE	High	Master Protein	O09175	Aminopeptidase B OS=Rattus norvegicus GN=Rnpep PE=1 SV=2	0	FALSE	58.819	18	9	78	9	650	72.6	5.67	269.4	9	metabolic process	extracellular;Golgi;membrane	catalytic activity;metal ion binding	Pf01433, Pf09127, Pf13485	81761		Rnpep	13				0	0	0.919	1.066	0.958	1.093	1.675	0.983	1.074	0.931	1.104	1.532	0.851	1.009	0.981	1.135	2.71	0.88	1.041	1.005	1.049	1.336
TRUE	High	Master Protein	D3ZX82	Cytoplasmic FMR1 interacting protein 2 (Predicted) OS=Rattus norvegicus GN=Cyfip2 PE=4 SV=2	0	FALSE	58.712	18	10	116	5	593	68.6	8.38	374.76	10	cell death;cell growth;cell organization and biogenesis;metabolic process;regulation of biological process	cytoplasm;membrane		Pf05994	303073	ENSRNOG00000006557.7	Cyfip2	10	Regulation of actin cytoskeleton; RNA transport	Regulation of Actin Cytoskeleton	RHO GTPases Activate WASPs and WAVEs; VEGFA-VEGFR2 Pathway; Regulation of actin dynamics for phagocytic cup formation	14	0	0.805	1.235	1.157	0.844	0.01	0.719	1.231	1.123	0.778	4.706	0.885	1.183	1.217	0.778	0.01	0.608	1.027	0.952	0.83	0.01
TRUE	High	Master Protein	Q920Q0	Paralemmin-1 OS=Rattus norvegicus GN=Palm PE=1 SV=1	0	FALSE	58.58	21	7	61	7	383	41.9	4.91	234.39	7	cell organization and biogenesis;regulation of biological process;response to stimulus	cytoplasm;membrane;nucleus	protein binding	Pf03285	170673	ENSRNOG00000009760.8	Palm	7				0	0	0.955	0.946	0.965	1.068	1.422	1.027	0.982	1.021	1.038	1.174	1.008	1.039	0.969	0.93	1.421	1.003	1.049	0.975	1.017	0.691
TRUE	High	Master Protein	P35704	Peroxiredoxin-2 OS=Rattus norvegicus GN=Prdx2 PE=1 SV=3	0	FALSE	58.575	29	5	108	5	198	21.8	5.59	503.77	5	cell proliferation;cellular homeostasis;metabolic process;regulation of biological process;response to stimulus	cytoplasm;cytosol;mitochondrion	antioxidant activity;catalytic activity	Pf00578, Pf08534, Pf10417	29338		Prdx2	19				0	0	0.986	1.05	1.039	0.857	1.189	1.03	1.068	1.103	0.901	1.028	0.908	1.032	0.963	0.743	0.01	0.863	1.015	0.997	0.747	1.587
TRUE	High	Master Protein	Q6AYU2	Pcbp2 protein OS=Rattus norvegicus GN=Pcbp2 PE=2 SV=1	0	FALSE	58.566	20	5	68	3	362	38.2	6.79	244.3	5	metabolic process;regulation of biological process	cytoplasm;cytosol;membrane;nucleus	DNA binding;protein binding;RNA binding	Pf00013, Pf13014	363005		Pcbp2	7		mRNA processing		1	3	0.841	1.044	1.063	0.847	0.01	0.752	1.011	1.017	0.728	0.01	0.81	1.074	0.999	0.856	0.01	0.813	0.99	0.941	0.745	0.01
TRUE	High	Master Protein	Q04462	Valine--tRNA ligase OS=Rattus norvegicus GN=Vars PE=2 SV=2	0	FALSE	58.48	9	10	66	10	1264	140.3	7.61	202.78	10	metabolic process;regulation of biological process	cytoplasm;cytosol;mitochondrion	catalytic activity;nucleotide binding	Pf00043, Pf00133, Pf08264, Pf09334, Pf13603	25009	ENSRNOG00000000867.6	Vars	20	Aminoacyl-tRNA biosynthesis			1	0	0.978	1.13	0.951	0.923	0.01	1.112	1.023	0.99	0.944	0.715	0.896	1.201	0.898	0.842	0.01	0.975	1.038	1.077	1.108	1.201
TRUE	High	Master Protein	F8WG67	Acyl-CoA thioesterase 7, isoform CRA_a OS=Rattus norvegicus GN=Acot7 PE=4 SV=2	0	FALSE	58.345	14	5	104	5	372	40.9	7.74	331.03	5	metabolic process	cytosol	catalytic activity;protein binding	Pf03061	26759	ENSRNOG00000010580.8	Acot7	5				0	0	1.051	1.088	1.012	1.006	1.522	1.055	1.063	1.072	1.057	1.2	0.911	1.05	1.04	0.979	1.068	0.931	1.111	1.049	1.015	0.01
TRUE	High	Master Protein	P37805	Transgelin-3 OS=Rattus norvegicus GN=Tagln3 PE=1 SV=2	0	FALSE	57.909	40	9	86	6	199	22.5	7.33	222.22	9	regulation of biological process	nucleus	protein binding	Pf00307, Pf00402	63837; 103693564	ENSRNOG00000002151.7; ENSRNOG00000059539.1	Tagln3; LOC103693564	11				0	5	0.824	0.959	1.005	0.812	1.073	0.807	1.075	1.077	0.803	1.042	0.869	1.19	0.964	0.909	0.897	0.838	1.113	0.98	0.795	0.963
TRUE	High	Master Protein	O88588	Phosphofurin acidic cluster sorting protein 1 OS=Rattus norvegicus GN=Pacs1 PE=2 SV=1	0	FALSE	57.835	10	8	68	7	961	104.6	7.75	273.02	8	cell organization and biogenesis;transport	Golgi	protein binding	Pf10254	171444		Pacs1	1				0	1	0.92	1.06	0.949	1.116	0.836	0.91	1.054	0.945	1.07	0.01	1.018	0.987	0.946	1.059	0.01	0.964	0.969	0.939	1.096	1.323
TRUE	High	Master Protein	F1LN69	Misshapen-like kinase 1 (Fragment) OS=Rattus norvegicus GN=Mink1 PE=4 SV=2	0	FALSE	57.802	8	9	85	6	1331	149.8	8.05	276.04	9	metabolic process		catalytic activity;nucleotide binding;protein binding	Pf00069, Pf00780, Pf07714, Pf14531		ENSRNOG00000033508.5		10			Oxidative Stress Induced Senescence	4	3	1.008	1.084	1.015	1.087	0.01	0.893	1.054	0.964	1.155	0.01	1.247	1.164	1.045	1.045	0.01	1.271	1.108	1.108	1.093	1.52
TRUE	High	Master Protein	Q68FU2	Phosphoserine aminotransferase OS=Rattus norvegicus GN=Psat1 PE=2 SV=1	0	FALSE	57.621	23	8	100	8	370	40.6	7.69	341.74	8	metabolic process	cytoplasm;cytosol	catalytic activity	Pf00266	293820		Psat1	1	Vitamin B6 metabolism; Metabolic pathways; Carbon metabolism; Glycine, serine and threonine metabolism; Biosynthesis of amino acids			5	0	1.075	1.087	0.982	1.088	0.933	1.114	1.102	0.988	1.105	1.148	1.2	1.207	0.905	0.845	0.01	1.131	1.117	0.929	0.836	0.295
TRUE	High	Master Protein	P02091	Hemoglobin subunit beta-1 OS=Rattus norvegicus GN=Hbb PE=1 SV=3	0	FALSE	57.602	46	6	237	2	147	16	8.07	771.13	6	cell organization and biogenesis;metabolic process;regulation of biological process;response to stimulus;transport		antioxidant activity;catalytic activity;metal ion binding;protein binding;transporter activity	Pf00042	24440		Hbb	1	African trypanosomiasis; Malaria			2	4	0.843	0.876	0.998	0.921	0.623	0.826	0.881	0.97	0.916	0.833	0.728	0.823	0.952	0.885	0.661	0.732	0.838	0.999	0.898	0.01
TRUE	High	Master Protein	O88565	RAB5A, member RAS oncogene family OS=Rattus norvegicus GN=Rab5a PE=2 SV=1	0	FALSE	57.557	27	6	75	3	215	23.6	8.15	243	6	cell organization and biogenesis;metabolic process;regulation of biological process;response to stimulus;transport	cytoplasm;cytoskeleton;cytosol;endosome;membrane	catalytic activity;nucleotide binding;protein binding	Pf00009, Pf00025, Pf00071, Pf04670, Pf08477	64633		Rab5a	9	Tuberculosis; Phagosome; Ras signaling pathway; Amyotrophic lateral sclerosis (ALS); Endocytosis; Amoebiasis; Vasopressin-regulated water reabsorption	EGFR1 Signaling Pathway		8	4	0.902	1.231	1.041	0.879	0.947	0.917	1.401	1.071	0.879	0.01	0.99	0.961	0.974	0.977	0.888	0.9	1.26	1.002	0.962	0.01
TRUE	High	Master Protein	G3V6S2	Cytoplasmic aconitate hydratase OS=Rattus norvegicus GN=Aco1 PE=4 SV=1	0	FALSE	57.286	13	9	75	1	889	98.1	7.39	289.9	9	cellular homeostasis;metabolic process;regulation of biological process;response to stimulus;transport	cytoplasm;cytosol;endoplasmic reticulum;Golgi;mitochondrion	catalytic activity;metal ion binding;RNA binding	Pf00330, Pf00694		ENSRNOG00000005849.7		5			Iron uptake and transport	2	8	0.987	1.071	1.011	1.15	1.093	1.002	1.099	1.03	1.194	1.387	0.922	1.054	0.905	1.075	2.785	0.981	1.111	0.961	1.082	2.304
TRUE	High	Master Protein	P19511	ATP synthase F(0) complex subunit B1, mitochondrial OS=Rattus norvegicus GN=Atp5f1 PE=1 SV=1	0	FALSE	57.123	16	5	109	5	256	28.9	9.36	345.12	5	metabolic process;transport	membrane;mitochondrion;nucleus	catalytic activity;transporter activity	Pf05405	171375; 100911417	ENSRNOG00000016000.6; ENSRNOG00000046299.2	Atp5f1; LOC100911417	2	Huntington's disease; Metabolic pathways; Alzheimer's disease; Parkinson's disease; Oxidative phosphorylation	Oxidative phosphorylation; Electron Transport Chain	Formation of ATP by chemiosmotic coupling; Cristae formation	14	0	1.087	1.035	0.996	1.057	1.429	1.088	1.018	0.987	1.087	0.889	1.056	0.964	0.957	1.097	1.287	1.061	1.004	0.961	1.056	0.54
TRUE	High	Master Protein	P63329	Serine/threonine-protein phosphatase 2B catalytic subunit alpha isoform OS=Rattus norvegicus GN=Ppp3ca PE=1 SV=1	0	FALSE	57.096	14	9	239	4	521	58.6	5.86	674.03	9	cell differentiation;cell organization and biogenesis;cellular homeostasis;metabolic process;regulation of biological process;response to stimulus;transport	cytoplasm;cytoskeleton;cytosol;membrane;mitochondrion;nucleus	catalytic activity;enzyme regulator activity;metal ion binding;protein binding	Pf00149	24674	ENSRNOG00000009882.7	Ppp3ca	2	Renin secretion; VEGF signaling pathway; Wnt signaling pathway; cGMP-PKG signaling pathway; Calcium signaling pathway; Amyotrophic lateral sclerosis (ALS); Natural killer cell mediated cytotoxicity; Long-term potentiation; Alzheimer's disease; Osteoclast differentiation; Oxytocin signaling pathway; Tuberculosis; Glucagon signaling pathway; Dopaminergic synapse; Axon guidance; Oocyte meiosis; Th1 …	Mitochondrial Gene Expression; Serotonin and anxiety; Spinal Cord Injury; MAPK signaling pathway; G Protein Signaling Pathways	FCERI mediated Ca+2 mobilization; Ca2+ pathway; CLEC7A (Dectin-1) induces NFAT activation	39	0	0.99	1.063	0.915	0.858	0.773	0.978	1.099	0.927	0.851	0.386	0.89	1.039	0.942	0.89	1.693	0.857	1.056	0.931	0.871	0.642
TRUE	High	Master Protein	G3V9P7	Huntingtin OS=Rattus norvegicus GN=Htt PE=4 SV=1	0	FALSE	57.035	5	9	48	9	3120	344.5	6.24	201.62	9	cell death;cell differentiation;cell organization and biogenesis;cellular component movement;metabolic process;regulation of biological process;response to stimulus;transport	cytoplasm;cytosol;endoplasmic reticulum;endosome;Golgi;membrane;nucleus;vacuole	protein binding	Pf12372	29424	ENSRNOG00000011073.7	Htt	14	Huntington's disease	EGFR1 Signaling Pathway		2	0	1.125	1.024	1.021	0.935	0.891	1.151	1.101	1.086	1.05	1.317	1.091	1.118	1.076	1.106	3.035	0.959	0.891	0.995	1.015	0.778
TRUE	High	Master Protein	Q6TXE9	LRRGT00050 OS=Rattus norvegicus GN=Eprs PE=2 SV=1	0	FALSE	56.906	9	12	45	12	1486	166.7	7.5	151.87	12	metabolic process;regulation of biological process;response to stimulus	cytoplasm;cytosol;membrane	catalytic activity;metal ion binding;nucleotide binding;protein binding;RNA binding	Pf00458, Pf00587, Pf00749, Pf01406, Pf03129, Pf03950, Pf09180, Pf14497	289352	ENSRNOG00000002393.7	Eprs	13	Porphyrin and chlorophyll metabolism; Aminoacyl-tRNA biosynthesis; Metabolic pathways			3	0						1.063	1.06	1.046	1.157	1.557	1.051	1.046	1.07	1.116	0.763	0.978	0.974	1.024	1.125	1.209
TRUE	High	Master Protein	D3Z941	Protein Mars OS=Rattus norvegicus GN=Mars PE=3 SV=1	0	FALSE	56.772	11	8	46	8	902	101.5	6.46	188.21	8	cell communication;metabolic process;regulation of biological process;response to stimulus	cytoplasm;cytosol;membrane;mitochondrion	catalytic activity;nucleotide binding;protein binding	Pf00043, Pf00133, Pf00458, Pf09334, Pf13410, Pf14497	299851	ENSRNOG00000025459.4	Mars	7	Selenocompound metabolism; Aminoacyl-tRNA biosynthesis			2	0	1.074	1.114	0.941	0.993	0.01	1.081	1.182	1.006	1.043	0.779	1.062	1.065	0.981	0.917	0.01	1.164	1.054	1.02	0.963	0.01
TRUE	High	Master Protein	Q63610	Tropomyosin alpha-3 chain OS=Rattus norvegicus GN=Tpm3 PE=1 SV=2	0	FALSE	56.658	23	7	54	4	248	29	4.78	185.49	7	cell organization and biogenesis	cytoplasm;cytoskeleton;cytosol	protein binding;structural molecule activity	Pf00261, Pf12718	117557	ENSRNOG00000017441.8	Tpm3	2	Dilated cardiomyopathy; Cardiac muscle contraction; Adrenergic signaling in cardiomyocytes; Hypertrophic cardiomyopathy (HCM); Pathways in cancer; Thyroid cancer	Striated Muscle Contraction	Striated Muscle Contraction; Smooth Muscle Contraction	10	3	0.733	1.013	1.035	0.799	0.627	0.702	1.111	1.065	0.832	1.594	1.017	1.002	0.95	0.961	1.484	0.976	0.924	1.098	0.879	0.01
TRUE	High	Master Protein	P07153	Dolichyl-diphosphooligosaccharide--protein glycosyltransferase subunit 1 OS=Rattus norvegicus GN=Rpn1 PE=2 SV=1	0	FALSE	56.614	12	5	52	5	605	68.3	6.51	217.24	5	metabolic process;transport	cytosol;endoplasmic reticulum;membrane	catalytic activity;RNA binding	Pf04597	25596		Rpn1	4		Proteasome Degradation		1	0	1.091	0.903	1.045	1.04	2.206	1.054	0.922	1.049	1.035	1.959	0.867	0.892	0.938	0.913	0.01	0.986	1.033	1.011	1.031	2.842
TRUE	High	Master Protein	M0R608	Reticulon OS=Rattus norvegicus GN=Rtn1 PE=4 SV=1	0	FALSE	56.533	8	5	68	1	761	82.4	5.34	265.66	5				Pf02453								0	4	0.985	1.03	1.102	1.198	0.482	1.002	1.03	1.038	1.217	0.463	0.967	0.968	1.12	1.341	0.862	0.953	1.005	1.064	1.313	0.671
TRUE	High	Master Protein	Q6P6R2	Dihydrolipoyl dehydrogenase, mitochondrial OS=Rattus norvegicus GN=Dld PE=1 SV=1	0	FALSE	56.511	21	9	75	9	509	54	7.87	282.52	9	cellular homeostasis;metabolic process;regulation of biological process	mitochondrion;organelle lumen	catalytic activity;nucleotide binding	Pf00070, Pf00890, Pf01134, Pf01946, Pf02852, Pf03486, Pf07992, Pf12831, Pf13450	298942	ENSRNOG00000006364.7	Dld	6	Carbon metabolism; Glycine, serine and threonine metabolism; Glyoxylate and dicarboxylate metabolism; Metabolic pathways; Glycolysis / Gluconeogenesis; Propanoate metabolism; Pyruvate metabolism; Valine, leucine and isoleucine degradation; Citrate cycle (TCA cycle)	Fatty Acid Beta Oxidation; Glycolysis and Gluconeogenesis; TCA Cycle; Beta Oxidation Meta Pathway; Hexoses metabolism in proximal tubules	Glycine degradation; Lysine catabolism; Citric acid cycle (TCA cycle); Regulation of pyruvate dehydrogenase (PDH) complex; Branched-chain amino acid catabolism; Signaling by Retinoic Acid	29	0	0.991	0.993	1.014	1.008	1.438	0.988	0.969	0.998	0.966	0.55	1.692	1.341	0.828	0.784	1.221	0.95	1.117	0.989	0.888	0.01
TRUE	High	Master Protein	P10111	Peptidyl-prolyl cis-trans isomerase A OS=Rattus norvegicus GN=Ppia PE=1 SV=2	0	FALSE	56.425	24	4	199	3	164	17.9	8.16	561.67	4	cell differentiation;cell organization and biogenesis;metabolic process;regulation of biological process	cytoplasm;cytosol;extracellular;membrane;nucleus	catalytic activity;RNA binding	Pf00160	25518; 100360977	ENSRNOG00000027864.5; ENSRNOG00000055068.1	Ppia; LOC100360977	14			Basigin interactions; Neutrophil degranulation	6	0	0.978	0.992	1.01	1.033	0.527	0.966	0.967	0.994	1.052	0.705	1.028	0.978	1.023	0.992	0.761	1.018	0.97	1.024	0.998	1.874
TRUE	High	Master Protein	Q68FQ9	LanC lantibiotic synthetase component C-like 2 (Bacterial) OS=Rattus norvegicus GN=Lancl2 PE=2 SV=1	0	FALSE	56.385	18	5	46	5	450	50.9	7.46	213.04	5	regulation of biological process;response to stimulus	cytoskeleton;cytosol;membrane;nucleus		Pf05147	362375	ENSRNOG00000006810.6	Lancl2	4				0	0	1.076	0.995	1.023	0.907	0.01	1.072	0.992	1.016	0.994	1.598	1.031	1.135	1.062	1.066	1.195	0.975	1.032	1.023	0.95	0.01
TRUE	High	Master Protein	G3V826	Transketolase OS=Rattus norvegicus GN=Tkt PE=3 SV=1	0	FALSE	56.384	12	6	68	5	655	71.1	7.62	234.01	6	metabolic process;regulation of biological process	membrane	catalytic activity;metal ion binding;protein binding	Pf00456, Pf00676, Pf02779, Pf02780, Pf09364	64524	ENSRNOG00000016064.6	Tkt	16		Pentose Phosphate Pathway	Insulin effects increased synthesis of Xylulose-5-Phosphate; Pentose phosphate pathway (hexose monophosphate shunt)	6	1	1.031	1.089	1.033	1.02	1.76	1.081	1.196	0.971	0.931	0.01	0.97	1.106	1.02	0.888	0.01	0.996	1.082	0.98	0.889	1.473
TRUE	High	Master Protein	F1LRZ7	Neurofilament heavy polypeptide OS=Rattus norvegicus GN=Nefh PE=3 SV=1	0	FALSE	55.777	10	9	48	7	1064	114.3	5.81	198.08	9	cell organization and biogenesis;regulation of biological process;response to stimulus	cytoplasm;mitochondrion;nucleus	protein binding;structural molecule activity	Pf00038, Pf07142, Pf10186, Pf15035	24587	ENSRNOG00000008716.6	Nefh	14	Amyotrophic lateral sclerosis (ALS)			1	1	0.815	0.943	0.895	0.764	0.01	1.072	1.211	1.046	1.024	0.01						0.709	0.766	0.695	0.477	0.01
TRUE	High	Master Protein	Q63092	CaM kinase-like vesicle-associated protein OS=Rattus norvegicus GN=Camkv PE=1 SV=1	0	FALSE	55.649	17	8	67	8	504	54.1	5.54	232.62	8	metabolic process;regulation of biological process;response to stimulus	membrane	catalytic activity;nucleotide binding;protein binding	Pf00069, Pf07714	79011		Camkv	8				0	0	0.977	1.044	1.027	0.915	0.779	1.024	1.015	0.996	0.966	1.569	1.031	0.959	1.015	1.002	2.551	0.954	0.969	1.003	1.05	0.803
TRUE	High	Master Protein	O35179	Endophilin-A1 OS=Rattus norvegicus GN=Sh3gl2 PE=1 SV=2	0	FALSE	55.549	16	5	103	3	352	39.9	5.39	423.25	5	cell growth;cell organization and biogenesis;regulation of biological process;response to stimulus;transport	cytoplasm;endosome;membrane	protein binding	Pf00018, Pf03114, Pf07653, Pf10455, Pf14604	116743	ENSRNOG00000006761.7	Sh3gl2	5	Endocytosis	EGFR1 Signaling Pathway	Golgi Associated Vesicle Biogenesis; Negative regulation of MET activity; Lysosome Vesicle Biogenesis; MHC class II antigen presentation; EGFR downregulation; Cargo recognition for clathrin-mediated endocytosis; Recycling pathway of L1; Retrograde neurotrophin signalling	26	0	0.869	0.875	0.905	0.918	1.125	0.875	0.892	0.928	0.956	1.32	0.822	0.856	0.844	0.832	0.968	0.884	0.894	0.905	0.906	1.125
TRUE	High	Master Protein	Q9JLJ3	4-trimethylaminobutyraldehyde dehydrogenase OS=Rattus norvegicus GN=Aldh9a1 PE=1 SV=1	0	FALSE	55.357	18	7	51	6	494	53.6	6.92	191.61	7	metabolic process	cytoplasm;cytosol;mitochondrion	catalytic activity;nucleotide binding;protein binding	Pf00171	64040		Aldh9a1	13	Pyruvate metabolism; Fatty acid degradation; Glycerolipid metabolism; Lysine degradation; Tryptophan metabolism; Ascorbate and aldarate metabolism; Arginine and proline metabolism; Metabolic pathways; beta-Alanine metabolism; Histidine metabolism; Valine, leucine and isoleucine degradation; Glycolysis / Gluconeogenesis	Tryptophan metabolism		13	1	0.939	0.999	0.938	0.837	0.762	1.084	1.005	1.018	1.051	1.706	1.055	1.032	0.98	0.972	0.761	1.076	1.014	1.011	1.017	1.463
TRUE	High	Master Protein	P51650	Succinate-semialdehyde dehydrogenase, mitochondrial OS=Rattus norvegicus GN=Aldh5a1 PE=1 SV=2	0	FALSE	55.345	16	8	71	8	523	56.1	8.09	290.58	8	cell organization and biogenesis;metabolic process	mitochondrion	catalytic activity;nucleotide binding	Pf00171	291133		Aldh5a1	17				0	0	1.055	0.875	1.034	0.851	0.636	1.066	0.921	1.038	0.822	1.11	1.041	0.96	0.997	0.877	2.017	0.997	0.977	0.958	0.764	1.332
TRUE	High	Master Protein	P14604	Enoyl-CoA hydratase, mitochondrial OS=Rattus norvegicus GN=Echs1 PE=1 SV=1	0	FALSE	55.322	19	4	64	4	290	31.5	8.13	261.9	4	metabolic process	mitochondrion;organelle lumen	catalytic activity	Pf00378, Pf01343	140547; 100911186	ENSRNOG00000018522.6; ENSRNOG00000047565.2	Echs1; LOC100911186	1	Fatty acid metabolism; beta-Alanine metabolism; Valine, leucine and isoleucine degradation; Tryptophan metabolism; Fatty acid degradation; Carbon metabolism; Lysine degradation; Propanoate metabolism; Metabolic pathways; Fatty acid elongation; Butanoate metabolism	Fatty Acid Beta Oxidation; Tryptophan metabolism; Beta Oxidation Meta Pathway; Fatty Acid Biosynthesis	Beta oxidation of hexanoyl-CoA to butanoyl-CoA; Beta oxidation of butanoyl-CoA to acetyl-CoA; Beta oxidation of lauroyl-CoA to decanoyl-CoA-CoA; Beta oxidation of octanoyl-CoA to hexanoyl-CoA; Beta oxidation of decanoyl-CoA to octanoyl-CoA-CoA	25	0	1.024	1.052	1.091	0.999	0.893	0.982	1.059	1.001	0.993	1.513	1.026	1.07	1.04	1.082	1.933	1.04	1.083	0.982	1.103	2.885
TRUE	High	Master Protein	G3V8A5	Vacuolar protein sorting-associated protein 35 OS=Rattus norvegicus GN=Vps35 PE=3 SV=1	0	FALSE	55.158	12	10	90	10	796	91.7	5.44	291.91	10	cell organization and biogenesis;regulation of biological process;transport	cytoplasm;cytosol;endosome;membrane;mitochondrion;vacuole	protein binding;transporter activity	Pf03635	25479	ENSRNOG00000017612.5	Vps35	19	Endocytosis		WNT ligand biogenesis and trafficking	4	0	1.259	1.076	1.101	1.225	0.738	1.227	1.168	1.124	1.213	0.73	1.034	1.206	1.07	1.137	0.01	1.056	1.219	1.078	1.184	0.01
TRUE	High	Master Protein	Q5M7T6	ATPase, H+ transporting, lysosomal 38kDa, V0 subunit d1 OS=Rattus norvegicus GN=Atp6v0d1 PE=2 SV=1	0	FALSE	55.037	17	5	75	5	351	40.3	5	281.84	5	cellular homeostasis;response to stimulus;transport	endosome;membrane	catalytic activity;protein binding;transporter activity	Pf01992	291969	ENSRNOG00000017235.6	Atp6v0d1	19	Lysosome; Oxidative phosphorylation; Metabolic pathways; Synaptic vesicle cycle; Phagosome; Collecting duct acid secretion; Rheumatoid arthritis; Tuberculosis; Viral carcinogenesis	Proximal Tubule Transporters	Ion channel transport; Transferrin endocytosis and recycling; Insulin receptor recycling; ROS, RNS production in phagocytes	21	0	1.008	0.989	1.001	1.035	0.434	1.071	1.047	1.065	1.098	0.598	0.997	0.961	1.046	0.91	1.753	1.092	0.993	1.032	1.108	0.985
TRUE	High	Master Protein	P61265	Syntaxin-1B OS=Rattus norvegicus GN=Stx1b PE=1 SV=1	0	FALSE	55.026	17	5	81	3	288	33.2	5.38	303.6	5	cell organization and biogenesis;regulation of biological process;transport	cytoplasm;membrane;nucleus	protein binding	Pf00804, Pf05739, Pf13166, Pf14523	24923	ENSRNOG00000019193.4	Stx1b	1	SNARE interactions in vesicular transport; Synaptic vesicle cycle		LGI-ADAM interactions	4	0	1.016	0.814	0.855	1.088	1.366	1.032	0.826	0.819	1.084	0.874	0.94	1.093	0.977	1.033	0.01	0.877	1.157	0.958	0.904	0.01
TRUE	High	Master Protein	D4A6H8	Protein Ctnna2 (Fragment) OS=Rattus norvegicus GN=Ctnna2 PE=4 SV=2	0	FALSE	54.977	9	8	41	8	922	101.7	5.69	139.88	8			protein binding	Pf01044								0	0	1.05	1.061	1.051	1.015	1.009
TRUE	High	Master Protein	Q9Z0J8	Neuronal growth regulator 1 OS=Rattus norvegicus GN=Negr1 PE=1 SV=1	0	FALSE	54.913	17	4	54	4	348	37.8	6.52	249.13	4	regulation of biological process;response to stimulus	membrane	protein binding	Pf00047, Pf07679, Pf13895, Pf13927	59318		Negr1	2	Cell adhesion molecules (CAMs)			1	0	0.789	1.007	1.085	1.204	0.01						0.986	1.164	1.083	1.105	0.717	0.921	1.142	1.092	1.032	1.024
TRUE	High	Master Protein	G3V6T1	Protein Copa OS=Rattus norvegicus GN=Copa PE=4 SV=1	0	FALSE	54.844	9	8	40	8	1224	138.3	7.65	137.68	8	transport	cytoplasm;Golgi;membrane	protein binding;structural molecule activity	Pf00400, Pf04053, Pf06957	304978	ENSRNOG00000006247.7	Copa	13			COPI-dependent Golgi-to-ER retrograde traffic; COPI-mediated anterograde transport	11	0											1.034	1.088	1.049	1.066	0.619	1.025	1.088	1.05	1.115	0.01
TRUE	High	Master Protein	Q91Y81	Septin-2 OS=Rattus norvegicus GN=Sept2 PE=1 SV=1	0	FALSE	54.571	19	4	24	4	361	41.6	6.6	106.81	4	cell differentiation;cell division;cell organization and biogenesis;regulation of biological process;response to stimulus	cell surface;cytoplasm;cytoskeleton;cytosol;membrane;nucleus	catalytic activity;enzyme regulator activity;nucleotide binding;protein binding;structural molecule activity	Pf00071, Pf00735, Pf01926	117515	ENSRNOG00000017952.4	Sept2	9	Bacterial invasion of epithelial cells		Anchoring of the basal body to the plasma membrane	4	0											0.955	0.952	0.999	0.984	1.248	1.064	1.038	1.004	0.934	0.01
TRUE	High	Master Protein	Q01205	Dihydrolipoyllysine-residue succinyltransferase component of 2-oxoglutarate dehydrogenase complex, mitochondrial OS=Rattus norvegicus GN=Dlst PE=1 SV=2	0	FALSE	54.283	19	9	114	9	454	48.9	8.69	372.1	9	metabolic process	membrane;mitochondrion;nucleus	catalytic activity;protein binding	Pf00198, Pf00364	299201		Dlst	6	Lysine degradation; Citrate cycle (TCA cycle); Metabolic pathways; Carbon metabolism			4	0	1.042	0.986	0.988	0.947	0.01	1.055	0.973	0.987	0.939	0.573	0.981	0.985	1.032	0.989	1.295	0.984	0.969	0.988	0.903	0.01
TRUE	High	Master Protein	O88377	Phosphatidylinositol 5-phosphate 4-kinase type-2 beta OS=Rattus norvegicus GN=Pip4k2b PE=1 SV=1	0	FALSE	54.211	23	7	23	7	416	47.2	7.52	86.68	7	metabolic process;regulation of biological process	cytoplasm;endoplasmic reticulum;membrane;nucleus;vacuole	catalytic activity;nucleotide binding;protein binding	Pf01504	89812	ENSRNOG00000013030.3	Pip4k2b	10	Regulation of actin cytoskeleton; Phosphatidylinositol signaling system; Inositol phosphate metabolism	Regulation of Actin Cytoskeleton	PI5P, PP2A and IER3 Regulate PI3K/AKT Signaling; Synthesis of PIPs in the nucleus; Synthesis of PIPs at the plasma membrane; PI5P Regulates TP53 Acetylation	22	0	0.719	0.837	0.778	0.341	0.01	0.76	1.044	0.838	0.449	0.01	0.952	0.935	1.008	1.114	0.01	0.953	0.914	1.002	1.081	4.312
TRUE	High	Master Protein	F1LMT5	PEX5-related protein OS=Rattus norvegicus GN=Pex5l PE=4 SV=1	0	FALSE	54.196	12	5	40	5	597	66.2	5.31	195.37	5			protein binding	Pf00515, Pf13414, Pf13424, Pf13432								0	0											0.914	0.866	1.008	1.1	2.285	0.943	0.854	1.031	1.094	3.037
TRUE	High	Master Protein	P20650	Protein phosphatase 1A OS=Rattus norvegicus GN=Ppm1a PE=1 SV=1	0	FALSE	54.183	27	7	32	7	382	42.4	5.36	126.98	7	metabolic process;regulation of biological process;response to stimulus	cytoplasm;cytosol;membrane;nucleus	catalytic activity;metal ion binding;protein binding;signal transducer activity	Pf00481, Pf07830	24666		Ppm1a	6	MAPK signaling pathway	MAPK signaling pathway		2	0											1.03	1.001	1.002	1.021	0.93	0.902	1.021	1.076	1.082	0.01
TRUE	High	Master Protein	D3ZAI6	Protein Nt5dc3 OS=Rattus norvegicus GN=Nt5dc3 PE=3 SV=2	0	FALSE	54.174	13	7	69	7	546	63.1	8.62	212.42	7	metabolic process	cytosol;mitochondrion	catalytic activity;metal ion binding	Pf05761		ENSRNOG00000026793.5		7				0	0	1.035	0.849	0.815	0.725	0.501	1.021	0.907	0.814	0.787	0.833	1.103	0.704	0.866	0.532	0.01	1.066	0.776	0.881	0.622	0.01
TRUE	High	Master Protein	Q76EQ0	Serine racemase OS=Rattus norvegicus GN=Srr PE=1 SV=1	0	FALSE	54.123	18	4	49	4	333	35.7	6.02	248.35	4	cell organization and biogenesis;metabolic process;response to stimulus	cytoplasm;membrane	catalytic activity;metal ion binding;nucleotide binding;protein binding	Pf00291	303306	ENSRNOG00000002991.7	Srr	10	Glycine, serine and threonine metabolism; Metabolic pathways			2	0	1.014	1.033	1	1.109	1.283	1.005	1.074	1.062	1.185	1.223	0.908	0.921	0.943	0.945	0.499	0.889	0.856	0.924	0.958	0.922
TRUE	High	Master Protein	B2RYW9	Fumarylacetoacetate hydrolase domain-containing protein 2 OS=Rattus norvegicus GN=Fahd2 PE=1 SV=1	0	FALSE	54.013	16	4	58	4	313	34.6	8.35	290.71	4	metabolic process	mitochondrion	catalytic activity;metal ion binding	Pf01557	296131	ENSRNOG00000013974.7	Fahd2a	3				0	0	1.076	1.037	0.958	0.96	1.686	1.053	0.979	0.994	0.969	1.255	1.011	0.949	0.981	1.035	0.81	1.018	0.883	0.989	0.959	0.721
TRUE	High	Master Protein	Q498N3	Dctn4 protein OS=Rattus norvegicus GN=Dctn4 PE=2 SV=1	0	FALSE	53.734	23	9	35	9	460	52.2	7.69	132.59	9		chromosome	protein binding	Pf05502	84428	ENSRNOG00000019298.7	Dctn4	18				0	0	0.931	0.946	0.965	0.89	1.055						0.96	0.898	0.912	0.78	1.01	1.003	0.909	0.944	0.808	1.14
TRUE	High	Master Protein	Q5XHZ0	Heat shock protein 75 kDa, mitochondrial OS=Rattus norvegicus GN=Trap1 PE=1 SV=1	0	FALSE	53.693	10	6	46	5	706	80.4	7.03	167.12	6	metabolic process;regulation of biological process;response to stimulus	membrane;mitochondrion;organelle lumen	nucleotide binding;protein binding;RNA binding	Pf00183, Pf02518, Pf13589	287069	ENSRNOG00000005418.4	Trap1	10				0	0	0.988	1.088	1.128	0.959	1.424	1.027	1.013	1.071	0.951	1.216	0.912	0.991	1.035	0.946	1.875	0.878	0.995	1.029	0.994	1.624
TRUE	High	Master Protein	Q6AXV4	Sorting and assembly machinery component 50 homolog OS=Rattus norvegicus GN=Samm50 PE=1 SV=1	0	FALSE	53.589	25	11	78	11	469	51.9	6.8	242.46	11	cell organization and biogenesis;transport	cytoplasm;membrane;mitochondrion		Pf01103, Pf07244	300111	ENSRNOG00000011952.6	Samm50	7				0	0	1.106	0.932	0.959	0.919	0.968	1.158	0.965	1.035	0.89	1.007	1.079	1.1	1.035	1.129	2.001	1.025	0.962	0.988	1.034	1.358
TRUE	High	Master Protein	P04256	Heterogeneous nuclear ribonucleoprotein A1 OS=Rattus norvegicus GN=Hnrnpa1 PE=1 SV=3	0	FALSE	53.583	21	5	60	4	320	34.2	9.14	280.9	5	cell communication;metabolic process;regulation of biological process;response to stimulus;transport	cytoplasm;cytosol;membrane;nucleus;spliceosomal complex	catalytic activity;DNA binding;protein binding;RNA binding	Pf00076, Pf13893, Pf14259	29578		Hnrnpa1	7	Spliceosome	mRNA processing		2	0	1.11	0.931	1.081	1.018	1.894	1.098	0.918	1.16	1.05	0.904	1.083	0.935	1.145	1.18	1.38	1.129	0.887	1.188	1.12	2.552
TRUE	High	Master Protein	Q6P3V9	60S ribosomal protein L4 OS=Rattus norvegicus GN=Rpl4 PE=2 SV=1	0	FALSE	53.557	18	5	77	5	421	47.3	11.02	387.81	5	cell differentiation;metabolic process;regulation of biological process;response to stimulus	cytoplasm;endoplasmic reticulum;membrane;nucleus;ribosome	protein binding;RNA binding;structural molecule activity	Pf00573, Pf14374	64302	ENSRNOG00000009378.7	Rpl4	8		Cytoplasmic Ribosomal Proteins; TNF-alpha NF-kB Signaling Pathway	SRP-dependent cotranslational protein targeting to membrane; Formation of a pool of free 40S subunits; Major pathway of rRNA processing in the nucleolus and cytosol; GTP hydrolysis and joining of the 60S ribosomal subunit; Nonsense Mediated Decay (NMD) enhanced by the Exon Junction Complex (EJC); Nonsense Mediated Decay (NMD) independent of the Exon Junction Complex (EJC); L13a-mediated translati…	17	0	0.951	1.031	0.907	1.178	1.092	1.064	1.042	0.838	1.221	0.822	1.083	0.997	1.033	1.211	0.523	0.998	1.025	0.999	1.306	1.075
TRUE	High	Master Protein	P42346	Serine/threonine-protein kinase mTOR OS=Rattus norvegicus GN=Mtor PE=1 SV=1	0	FALSE	53.51	7	14	40	14	2549	288.6	7.17	135.83	14	cell communication;cell growth;cell organization and biogenesis;metabolic process;regulation of biological process;response to stimulus	cytoplasm;cytosol;endoplasmic reticulum;Golgi;membrane;mitochondrion;nucleus;vacuole	catalytic activity;DNA binding;nucleotide binding;protein binding	Pf00454, Pf02259, Pf02260, Pf08771, Pf11865	56718	ENSRNOG00000009615.7	Mtor	5	Endocrine resistance; Prostate cancer; Type II diabetes mellitus; ErbB signaling pathway; HIF-1 signaling pathway; AMPK signaling pathway; Acute myeloid leukemia; Phospholipase D signaling pathway; Longevity regulating pathway; mTOR signaling pathway; Jak-STAT signaling pathway; Central carbon metabolism in cancer; Insulin signaling pathway; Pathways in cancer; Longevity regulating pathway - mult…	ErbB signaling pathway; Insulin Signaling; Alpha6-Beta4 Integrin Signaling Pathway; IL-2 Signaling Pathway	VEGFR2 mediated vascular permeability; HSF1-dependent transactivation; mTORC1-mediated signalling; CD28 dependent PI3K/Akt signaling; Macroautophagy; TP53 Regulates Metabolic Genes; Regulation of PTEN gene transcription; Regulation of TP53 Degradation; Energy dependent regulation of mTOR by LKB1-AMPK	59	0	0.985	0.904	0.966	0.916	0.56	1.048	0.999	0.959	0.957	0.879	1.119	1.028	1.063	1.149	0.01	1.042	1.045	1.005	1.089	1.118
TRUE	High	Master Protein	Q6P6T0	Sideroflexin 3 OS=Rattus norvegicus GN=Sfxn3 PE=2 SV=1	0	FALSE	53.416	26	9	104	8	321	35.4	9.69	357.47	9	transport	membrane;mitochondrion	transporter activity	Pf03820	65042		Sfxn3	1				0	1	1.049	0.923	0.958	1	1.338	1.019	0.934	1.007	0.986	1.264	1.06	1.093	0.95	0.887	1.49	1.065	1.011	0.977	0.95	1.517
TRUE	High	Master Protein	G3V8T4	DNA damage-binding protein 1 OS=Rattus norvegicus GN=Ddb1 PE=4 SV=1	0	FALSE	53.38	12	12	81	12	1140	126.9	5.26	291.57	12	cell organization and biogenesis;metabolic process;regulation of biological process;response to stimulus	cytoplasm;nucleus	DNA binding;protein binding	Pf03178, Pf10433	64470	ENSRNOG00000020715.7	Ddb1	1	Ubiquitin mediated proteolysis; Hepatitis B; Nucleotide excision repair; Viral carcinogenesis		Dual Incision in GG-NER; Dual incision in TC-NER; Gap-filling DNA repair synthesis and ligation in TC-NER; Formation of Incision Complex in GG-NER; DNA Damage Recognition in GG-NER; Formation of TC-NER Pre-Incision Complex; Recognition of DNA damage by PCNA-containing replication complex; Neddylation	19	0	0.953	1.111	1.047	1.025	1.122	0.952	1.037	1.013	1.082	0.01	1.042	1.023	1.049	1.073	0.896	1.057	1.168	1.064	1.041	0.01
TRUE	High	Master Protein	P69682	Adaptin ear-binding coat-associated protein 1 OS=Rattus norvegicus GN=Necap1 PE=1 SV=1	0	FALSE	53.367	19	4	49	4	277	29.8	6.38	260.82	4	transport	membrane	protein binding	Pf07933	312694	ENSRNOG00000009236.6	Necap1	4			Cargo recognition for clathrin-mediated endocytosis; Golgi Associated Vesicle Biogenesis	7	0	1.217	0.98	1.151	1.074	0.01	1.228	0.976	1.159	1.088	0.01	1.046	0.912	0.983	1.104	1.336	0.981	0.939	1.019	1.065	0.889
TRUE	High	Master Protein	F1LSY2	Neuronal pentraxin receptor (Fragment) OS=Rattus norvegicus GN=Nptxr PE=4 SV=1	0	FALSE	53.344	22	8	74	8	494	52.2	6.02	259.05	8				Pf00354, Pf13385		ENSRNOG00000016156.6		7				0	0	1.055	1.033	0.98	1.091	0.01	1.07	0.997	1.009	1.172	1.358	0.969	1.03	1.054	1.015	1.349	1.082	1.047	1.071	1.21	2.139
TRUE	High	Master Protein	D4AA63	Protein Ubqln2 OS=Rattus norvegicus GN=Ubqln2 PE=4 SV=1	0	FALSE	53.33	10	4	23	3	638	67.2	5.22	93.09	4	metabolic process;regulation of biological process	cytoplasm;cytosol;membrane	protein binding	Pf00240, Pf00627, Pf11976	317396	ENSRNOG00000003099.6	Ubqln2	X	Protein processing in endoplasmic reticulum		Cargo recognition for clathrin-mediated endocytosis	5	2											0.938	0.88	1.105	1.382	2.77
TRUE	High	Master Protein	O70196	Prolyl endopeptidase OS=Rattus norvegicus GN=Prep PE=1 SV=1	0	FALSE	53.23	9	5	45	5	710	80.7	5.94	173.81	5	metabolic process	cytoplasm;cytosol;membrane;nucleus	catalytic activity	Pf00326, Pf02897	83471		Prep	20	Renin-angiotensin system			1	0	1.164	1.173	1.021	1.011	0.01	1.03	1.028	1.021	0.937	0.891	1.095	1.195	1.015	1.004	2.047
TRUE	High	Master Protein	P28037	Cytosolic 10-formyltetrahydrofolate dehydrogenase OS=Rattus norvegicus GN=Aldh1l1 PE=1 SV=3	0	FALSE	52.947	10	7	71	7	902	98.8	5.91	249.38	7	metabolic process	cytoplasm;cytosol;mitochondrion	catalytic activity;protein binding	Pf00171, Pf00550, Pf00551, Pf02911	64392		Aldh1l1	4	One carbon pool by folate	One Carbon Metabolism		2	0	1.051	0.951	1.133	1.004	0.819	1.06	0.907	1.09	1.012	1.08	0.964	0.993	0.804	0.811	0.01	1.048	0.753	1.277	0.897	0.966
TRUE	High	Master Protein	Q62718	Neurotrimin OS=Rattus norvegicus GN=Ntm PE=1 SV=1	0	FALSE	52.935	21	8	60	6	344	38	7.59	195.31	8	regulation of biological process;response to stimulus	cell surface;membrane	protein binding	Pf00047, Pf07679, Pf13895, Pf13927	50864		Ntm	8				0	2	0.721	1.068	1.031	0.8	0.525	0.768	1.047	1.014	0.915	0.01	0.919	1.049	0.959	0.882	0.01	0.849	1.071	0.993	0.905	1.566
TRUE	High	Master Protein	O55096	Dipeptidyl peptidase 3 OS=Rattus norvegicus GN=Dpp3 PE=1 SV=2	0	FALSE	52.919	17	8	15	8	738	83	5.22	65.33	8	metabolic process	cytoplasm;cytosol;membrane	catalytic activity;metal ion binding	Pf03571	114591	ENSRNOG00000031485.4	Dpp3	1				0	0	0.801	1.3	1.128	0.926	0.01						0.999	1.176	1.028	0.929	0.01	1	1.007	0.977	1.048	0.01
TRUE	High	Master Protein	D4A5X8	Protein Ahcyl1 OS=Rattus norvegicus GN=Ahcyl1 PE=3 SV=1	0	FALSE	52.852	19	9	86	5	475	52.9	7.97	279.86	9	metabolic process;regulation of biological process;response to stimulus;transport	cytoplasm;cytosol;endoplasmic reticulum;membrane	catalytic activity;nucleotide binding;protein binding;RNA binding	Pf00670, Pf01262, Pf01488, Pf02254, Pf02826, Pf05221	362013	ENSRNOG00000018569.7	Ahcyl1	2	Cysteine and methionine metabolism; Metabolic pathways			2	4	0.907	1.095	1.039	0.947	0.01	1.01	1.272	1.19	1.1	0.01	1.034	1.088	0.981	1.095	0.01	0.988	1.202	1.008	0.957	0.01
TRUE	High	Master Protein	Q8R491	EH domain-containing protein 3 OS=Rattus norvegicus GN=Ehd3 PE=1 SV=2	0	FALSE	52.794	16	8	60	3	535	60.8	6.46	227.41	8	cell organization and biogenesis;metabolic process;regulation of biological process;transport	cytoplasm;cytosol;endosome;membrane	metal ion binding;nucleotide binding;protein binding	Pf00350, Pf01926, Pf12763	192249	ENSRNOG00000007744.4	Ehd3	6	Endocytosis		Factors involved in megakaryocyte development and platelet production	3	1											0.95	0.858	1.124	1.14	2.42	0.976	0.971	1.052	1.006	2.273
TRUE	High	Master Protein	D4A5J1	Protein Kbtbd11 OS=Rattus norvegicus GN=Kbtbd11 PE=4 SV=1	0	FALSE	52.783	19	7	19	7	633	67.8	5.34	98.93	7	metabolic process		catalytic activity;protein binding	Pf00651, Pf01344, Pf13964	306617	ENSRNOG00000012333.4	Kbtbd11	16				0	0						0.936	0.991	0.942	1.103	1.567	1.026	1.011	1.022	1.085	0.01	1.02	0.989	1.021	1.047	0.01
TRUE	High	Master Protein	P97697	Inositol monophosphatase 1 OS=Rattus norvegicus GN=Impa1 PE=1 SV=2	0	FALSE	52.773	27	7	72	7	277	30.5	5.29	275.27	7	metabolic process;regulation of biological process;response to stimulus	cytoplasm	catalytic activity;metal ion binding;protein binding	Pf00459	83523		Impa1	2	Metabolic pathways; Phosphatidylinositol signaling system; Inositol phosphate metabolism			3	0	0.992	1.06	1.022	0.974	1.693	1.054	1.121	1.076	1.007	1.103	0.987	1.011	1.036	0.91	2.197	0.989	1.007	1.047	0.962	1.916
TRUE	High	Master Protein	Q499N5	Acyl-CoA synthetase family member 2, mitochondrial OS=Rattus norvegicus GN=Acsf2 PE=2 SV=1	0	FALSE	52.722	19	10	78	10	615	67.8	8.12	294.34	10	metabolic process	mitochondrion	catalytic activity;nucleotide binding	Pf00501, Pf13193	619561	ENSRNOG00000003330.4	Acsf2	10			Mitochondrial Fatty Acid Beta-Oxidation	4	0	1.054	0.996	0.927	0.898	0.815	0.984	0.945	0.901	0.815	1.055	0.93	0.931	0.93	0.845	0.01	0.943	0.958	0.924	0.799	1.227
TRUE	High	Master Protein	M0RA80	Protein Tnc OS=Rattus norvegicus GN=Tnc PE=4 SV=1	0	FALSE	52.619	7	10	54	10	2018	221.6	4.93	184.23	10			protein binding	Pf00041, Pf00147, Pf07974								0	0	1.114	1.034	1.014	1.058	0.931	1.034	1.045	1.013	1.023	1.311	0.952	1.004	0.997	0.994	1.986	0.926	1.054	0.993	1.008	0.01
TRUE	High	Master Protein	B2RYG0	Coronin OS=Rattus norvegicus GN=Coro1c PE=2 SV=1	0	FALSE	52.573	15	5	89	5	334	37.4	7.02	357.88	5	cell organization and biogenesis;cellular component movement;regulation of biological process	cytoskeleton	protein binding	Pf00400, Pf08953, Pf08954	501841		Coro1c	12				0	0	0.889	1.021	1.019	0.995	1.14	0.852	0.867	0.953	0.999	0.59	0.921	0.981	0.987	1.087	2.024	0.932	0.962	0.982	1.04	1.035
TRUE	High	Master Protein	B0BNL2	Peptidylprolyl cis/trans isomerase, NIMA-interacting 1 OS=Rattus norvegicus GN=LOC364561 PE=2 SV=1	0	FALSE	52.458	16	2	23	2	165	18.3	8.82	103.95	2	cell differentiation;cell organization and biogenesis;metabolic process;regulation of biological process	cytoplasm;cytosol;mitochondrion;nucleus	catalytic activity;motor activity;protein binding	Pf00397, Pf00639, Pf13616	298696	ENSRNOG00000020474.6	Pin1	8	RIG-I-like receptor signaling pathway	Wnt Signaling Pathway NetPath	Negative regulators of DDX58/IFIH1 signaling; Regulation of TP53 Activity through Phosphorylation; PI5P Regulates TP53 Acetylation	14	0	1.087	1.07	1.149	1.394	1.404	1.121	1.069	1.144	1.335	0.865	1.162	1.084	1.117	1.26	1.136	1.208	1.139	1.284	1.336	0.01
TRUE	High	Master Protein	G3V8U9	Proteasome subunit beta type OS=Rattus norvegicus GN=Psmb4 PE=3 SV=1	0	FALSE	52.336	32	5	44	5	264	29.2	5.9	132.62	5	metabolic process;regulation of biological process	cytoplasm;nucleus;proteasome	catalytic activity	Pf00227	58854		Psmb4	2	Proteasome	Proteasome Degradation		2	0	0.872	1.071	0.961	1.024	1.74	0.882	1.039	0.957	0.946	0.81	1.017	1.099	0.872	0.848	0.01	1.002	1.108	0.866	0.919	0.01
TRUE	High	Master Protein	P03994	Hyaluronan and proteoglycan link protein 1 OS=Rattus norvegicus GN=Hapln1 PE=1 SV=2	0	FALSE	52.296	24	8	38	8	354	40.2	7.96	120.67	8		extracellular	structural molecule activity	Pf00193	29331	ENSRNOG00000032002.5	Hapln1	2				0	0	0.946	0.986	0.98	0.987	0.53	0.97	1.001	0.97	0.986	1.299	0.832	0.854	0.856	0.803	1.042	1.01	1.152	0.891	0.935	0.01
TRUE	High	Master Protein	B2RZ63	WD repeat domain 13 OS=Rattus norvegicus GN=Wdr13 PE=2 SV=1	0	FALSE	52.247	23	6	32	6	393	43	7.46	100.61	6		membrane	protein binding	Pf00400	317370		Wdr13	X				0	0											0.875	1.49	1.106	0.952	0.01	0.945	1.068	1.036	1.048	1.291
TRUE	High	Master Protein	Q80Z30	Protein phosphatase 1E OS=Rattus norvegicus GN=Ppm1e PE=1 SV=1	0	FALSE	52.192	12	7	50	7	750	83.4	4.89	176.69	7	metabolic process;regulation of biological process;response to stimulus	cytoplasm;mitochondrion;nucleus	catalytic activity;metal ion binding;protein binding	Pf00481	360593	ENSRNOG00000024730.1	Ppm1e	10				0	0	0.9	1.256	1.164	1.015	0.01						1.059	1.071	1.066	1.218	0.01	1.08	1.043	1.035	1.168	0.01
TRUE	High	Master Protein	Q00981	Ubiquitin carboxyl-terminal hydrolase isozyme L1 OS=Rattus norvegicus GN=Uchl1 PE=1 SV=2	0	FALSE	52.137	30	7	92	7	223	24.8	5.24	314.23	7	cell communication;cell organization and biogenesis;cell proliferation;cellular component movement;metabolic process;regulation of biological process;response to stimulus;transport	cytoplasm;cytosol;endoplasmic reticulum;membrane	catalytic activity;protein binding	Pf01088	29545	ENSRNOG00000002343.7	Uchl1	14	Parkinson's disease	Proteasome Degradation	UCH proteinases	6	0	1	0.947	0.978	0.949	0.942	1.098	0.95	0.995	1.029	1.154	0.972	1.083	1.188	0.936	0.01	1.038	1.051	1.167	1.007	0.01
TRUE	High	Master Protein	Q5U2N2	Ubiquitin carboxyl-terminal hydrolase OS=Rattus norvegicus GN=Usp14 PE=2 SV=1	0	FALSE	52.057	16	5	70	5	493	55.9	5.2	268.71	5	cell communication;metabolic process;regulation of biological process	cell surface;cytosol;nucleus	catalytic activity;enzyme regulator activity;protein binding	Pf00443, Pf13423	291796	ENSRNOG00000014981.7	Usp14	18			Ub-specific processing proteases	4	0	0.976	0.928	0.987	0.878	1.295	0.968	0.89	0.999	0.915	0.01	1.121	0.997	0.979	0.916	0.01	1.092	0.947	0.967	0.783	0.01
TRUE	High	Master Protein	Q6GMN2	Brain-specific angiogenesis inhibitor 1-associated protein 2 OS=Rattus norvegicus GN=Baiap2 PE=1 SV=1	0	FALSE	51.812	16	7	73	2	535	59.1	9.04	246.47	7	cell differentiation;cell organization and biogenesis;regulation of biological process;response to stimulus	cytoplasm;cytoskeleton;cytosol;endoplasmic reticulum;Golgi;membrane	protein binding	Pf00018, Pf07653, Pf08397, Pf14604	117542	ENSRNOG00000004049.7	Baiap2	10	Adherens junction; Regulation of actin cytoskeleton	Regulation of Actin Cytoskeleton	RHO GTPases Activate WASPs and WAVEs; VEGFA-VEGFR2 Pathway; Regulation of actin dynamics for phagocytic cup formation	14	5	1.001	1.111	0.995	0.989	0.01						1.021	1.101	1.127	1.207	0.01	0.977	0.994	1.077	1.096	2.316
TRUE	High	Master Protein	P31977	Ezrin OS=Rattus norvegicus GN=Ezr PE=1 SV=3	0	FALSE	51.623	12	7	58	5	586	69.3	6.1	193.98	7	cell differentiation;cell organization and biogenesis;metabolic process;regulation of biological process;response to stimulus;transport	cytoplasm;cytoskeleton;cytosol;endosome;membrane	protein binding;RNA binding;structural molecule activity	Pf00373, Pf00769, Pf09379, Pf09380	54319	ENSRNOG00000018524.6	Ezr	1	Gastric acid secretion; Regulation of actin cytoskeleton; Leukocyte transendothelial migration; Proteoglycans in cancer; MicroRNAs in cancer	CFTR activity in the plasma membrane; Regulation of Actin Cytoskeleton	Recycling pathway of L1; Netrin-1 signaling	12	2	0.966	1.081	1.011	0.939	2.083	1.084	1.095	0.982	0.904	1.535	1.001	1.09	1.019	0.902	0.65	1.033	1.034	1.001	0.876	0.691
TRUE	High	Master Protein	Q62683	NMDAR1 glutamate receptor subunit OS=Rattus norvegicus PE=2 SV=1	0	FALSE	51.574	11	10	91	10	938	105.5	8.84	286.21	10	cell communication;cell organization and biogenesis;cellular homeostasis;metabolic process;regulation of biological process;response to stimulus;transport	cell surface;cytoplasm;endoplasmic reticulum;membrane	metal ion binding;protein binding;receptor activity;signal transducer activity;transporter activity	Pf00060, Pf00497, Pf01094, Pf10562, Pf10613, Pf13458	24408		Grin1	3		Hypothetical Network for Drug Addiction		1	0	0.967	0.891	1	0.898	0.01	0.92	0.905	0.971	0.928	0.498	0.909	0.835	0.97	0.757	0.01	0.878	0.929	0.898	0.726	0.01
TRUE	High	Master Protein	P09456	cAMP-dependent protein kinase type I-alpha regulatory subunit OS=Rattus norvegicus GN=Prkar1a PE=2 SV=2	0	FALSE	51.499	23	8	82	5	381	43.1	5.35	302.16	8	cell organization and biogenesis;cell proliferation;regulation of biological process	cytoplasm;membrane	enzyme regulator activity;nucleotide binding;protein binding	Pf00027, Pf02197	25725	ENSRNOG00000049876.1	Prkar1a	10	Insulin signaling pathway	Myometrial Relaxation and Contraction Pathways; Calcium Regulation in the Cardiac Cell; EGFR1 Signaling Pathway; G Protein Signaling Pathways	Signaling by GPCR; Vasopressin regulates renal water homeostasis via Aquaporins; Factors involved in megakaryocyte development and platelet production; PKA activation in glucagon signalling; Hedgehog 'off' state; PKA activation; DARPP-32 events	29	3	0.964	0.943	0.969	0.969	0.599	0.946	0.903	0.946	0.965	1.086	0.969	0.977	0.995	0.962	2.323	0.951	0.964	1.001	0.96	0.906
TRUE	High	Master Protein	Q6P503	ATPase, H+ transporting, V1 subunit D, isoform CRA_c OS=Rattus norvegicus GN=Atp6v1d PE=2 SV=1	0	FALSE	51.473	25	6	92	6	247	28.3	9.45	352.48	6	cell organization and biogenesis;transport	membrane	catalytic activity;transporter activity	Pf01813	299159	ENSRNOG00000009080.6	Atp6v1d	6	Rheumatoid arthritis; mTOR signaling pathway; Synaptic vesicle cycle; Metabolic pathways; Oxidative phosphorylation; Phagosome; Collecting duct acid secretion	Proximal Tubule Transporters	Ion channel transport; Transferrin endocytosis and recycling; Insulin receptor recycling; Neutrophil degranulation; ROS, RNS production in phagocytes	20	0	1.173	1.04	1.057	1.442	1.314	1.132	1.03	1.063	1.363	1.272	1.167	0.993	1.011	1.195	0.01	1.124	0.968	0.944	1.156	0.01
TRUE	High	Master Protein	P19627	Guanine nucleotide-binding protein G(z) subunit alpha OS=Rattus norvegicus GN=Gnaz PE=2 SV=3	0	FALSE	51.276	24	7	54	6	355	40.9	7.61	189.18	7	regulation of biological process;response to stimulus	cytosol;membrane	catalytic activity;metal ion binding;nucleotide binding;protein binding;signal transducer activity	Pf00025, Pf00503, Pf13481	25740	ENSRNOG00000001313.4	Gnaz	20	Long-term depression	Calcium Regulation in the Cardiac Cell; G Protein Signaling Pathways	G-protein activation; G alpha (z) signalling events; PLC beta mediated events; Cooperation of PDCL (PhLP1) and TRiC/CCT in G-protein beta folding	15	0	0.974	0.924	1.034	1.11	1.916	0.956	0.89	0.989	1.048	0.01	0.947	0.986	1.017	1.016	2.658	0.955	0.992	1.052	0.991	1.24
TRUE	High	Master Protein	Q9Z1E1	Flotillin-1 OS=Rattus norvegicus GN=Flot1 PE=2 SV=2	0	FALSE	51.257	22	7	21	7	428	47.5	7.15	76.98	7	cell organization and biogenesis;regulation of biological process;response to stimulus;transport	cytoskeleton;endosome;membrane	protein binding	Pf01145	64665	ENSRNOG00000000826.7	Flot1	20	Insulin signaling pathway	Insulin Signaling		2	0	1.014	0.892	0.895	0.863	0.875						0.945	0.957	1.014	1.018	0.01	0.95	0.944	1.017	1.087	0.753
TRUE	High	Master Protein	Q5XIT1	Microtubule-associated protein RP/EB family member 3 OS=Rattus norvegicus GN=Mapre3 PE=1 SV=1	0	FALSE	51.228	19	4	50	4	281	31.9	5.54	176.92	4	cell division;regulation of biological process	cytoplasm;cytoskeleton	protein binding	Pf00307, Pf03271	298848	ENSRNOG00000008961.4	Mapre3	6				0	0	0.986	0.994	0.982	0.974	2.326						0.989	1.076	0.979	1.032	4.931	0.973	1.055	0.976	1.016	0.01
TRUE	High	Master Protein	D3ZE17	Caskin-1 OS=Rattus norvegicus GN=Caskin1 PE=4 SV=2	0	FALSE	51.203	8	9	38	8	1430	150.2	9.14	127.49	9	regulation of biological process;response to stimulus	cytoplasm;membrane	protein binding	Pf00018, Pf00023, Pf00536, Pf07647, Pf07653, Pf12796, Pf13388, Pf13606, Pf13637, Pf13857, Pf14604	140722	ENSRNOG00000003195.8	Caskin1	10				0	1	0.928	1.082	1.137	0.938	1.28	1.056	0.986	0.981	1.015	0.784	0.933	1.037	1.035	1.025	1.227	0.917	1.005	0.942	0.958	0.765
TRUE	High	Master Protein	D3ZD09	Cytochrome c oxidase subunit 6B1 OS=Rattus norvegicus GN=Cox6b1 PE=4 SV=1	0	FALSE	51.111	51	5	113	5	86	10.1	8.72	422.69	5		membrane;mitochondrion	catalytic activity;transporter activity	Pf02297	688869	ENSRNOG00000034161.4	LOC688869; Cox6b1	1; 2	Huntington's disease; Oxidative phosphorylation; Non-alcoholic fatty liver disease (NAFLD); Metabolic pathways; Alzheimer's disease; Cardiac muscle contraction; Parkinson's disease			7	0	1.023	0.97	1.203	1.189	0.943	1.023	1.001	1.165	1.24	1.024	0.985	0.978	1.094	1.296	1.397	1.007	1.042	1.116	1.161	1.302
TRUE	High	Master Protein	P11517	Hemoglobin subunit beta-2 OS=Rattus norvegicus PE=1 SV=2	0	FALSE	51.111	31	5	201	1	147	16	8.79	656.2	5	transport		metal ion binding;transporter activity	Pf00042	100134871; 689064; 103694857	ENSRNOG00000054582.1; ENSRNOG00000047098.2; ENSRNOG00000061299.1	LOC100134871; LOC689064; LOC103694857	1	African trypanosomiasis; Malaria		Erythrocytes take up oxygen and release carbon dioxide; Factors involved in megakaryocyte development and platelet production; Erythrocytes take up carbon dioxide and release oxygen; Neutrophil degranulation; Scavenging of heme from plasma	14	0	1.253	1.624	1.404	0.817	0.01	1.248	1.63	1.369	0.889	1.165	1.223	1.617	1.3	0.787	0.01	1.367	1.868	1.501	0.776	0.01
TRUE	High	Master Protein	P84076	Neuron-specific calcium-binding protein hippocalcin OS=Rattus norvegicus GN=Hpca PE=1 SV=2	0	FALSE	51.109	45	8	106	2	193	22.4	4.97	313.59	8	regulation of biological process;response to stimulus	cytoplasm;cytosol;membrane	metal ion binding;protein binding	Pf00036, Pf13202, Pf13405, Pf13499, Pf13833	29177	ENSRNOG00000006979.7	Hpca	5				0	6	0.935	0.85	0.904	0.766	0.274	0.927	0.879	0.933	0.785	0.431	0.911	0.767	0.949	0.793	0.649	0.914	0.827	0.937	0.846	1.298
TRUE	High	Master Protein	F1M4N6	Protein Dock3 (Fragment) OS=Rattus norvegicus GN=Dock3 PE=4 SV=2	0	FALSE	51.098	5	9	39	8	2030	233.2	6.96	148.81	9			protein binding	Pf06920, Pf07653, Pf14429, Pf14604								0	1	1	1.055	0.952	1.019	0.01	1.001	1.029	0.942	0.929	1	0.966	1.447	1.379	0.739	0.01	0.998	0.889	0.969	0.846	0.01
TRUE	High	Master Protein	Q62634	Vesicular glutamate transporter 1 OS=Rattus norvegicus GN=Slc17a7 PE=1 SV=1	0	FALSE	50.85	12	8	79	4	560	61.6	7.34	282.98	8	cell communication;cellular homeostasis;response to stimulus;transport	membrane	transporter activity	Pf00083, Pf07690	116638	ENSRNOG00000020650.7	Slc17a7	1	Glutamatergic synapse; Synaptic vesicle cycle; Nicotine addiction; Retrograde endocannabinoid signaling		Glutamate Neurotransmitter Release Cycle; Organic anion transporters	12	4	0.797	1.099	1.022	0.813	0.397	0.831	1.172	1.088	0.839	0.425	0.748	0.936	0.898	0.646	0.01	0.796	1.121	1.041	0.791	0.01
TRUE	High	Master Protein	Q3MID5	Phosphatidylinositol-4-phosphate 5-kinase, type I, gamma OS=Rattus norvegicus GN=Pip5k1c PE=2 SV=1	0	FALSE	50.741	12	6	46	6	636	69.6	5.82	163.26	6	cell organization and biogenesis;metabolic process;response to stimulus;transport	cytosol;membrane	catalytic activity;nucleotide binding;protein binding	Pf01504	314641	ENSRNOG00000020577.7	Pip5k1c	7	Metabolic pathways; Inositol phosphate metabolism; Endocytosis; Fc gamma R-mediated phagocytosis; Phosphatidylinositol signaling system; Choline metabolism in cancer; Phospholipase D signaling pathway; Regulation of actin cytoskeleton	Focal Adhesion; Regulation of Actin Cytoskeleton	PI5P, PP2A and IER3 Regulate PI3K/AKT Signaling; Synthesis of PIPs at the plasma membrane; Clathrin-mediated endocytosis; SEMA3A-Plexin repulsion signaling by inhibiting Integrin adhesion	27	0	0.998	1.037	1.048	1.003	1.972	0.93	1.01	0.972	0.957	1.355	0.976	0.999	0.962	0.969	0.01	0.944	0.981	0.985	0.94	1.699
TRUE	High	Master Protein	F1LSE6	Liprin-alpha-3 OS=Rattus norvegicus GN=Ppfia3 PE=4 SV=1	0	FALSE	50.668	13	11	37	9	1192	133.3	5.64	135.25	11	regulation of biological process;transport	cytoplasm	protein binding	Pf00536, Pf04156, Pf07647, Pf12128	140591		Ppfia3	1				0	2	0.959	1.049	1.045	1.006	0.01	1.016	0.972	0.949	0.945	2.184	0.914	0.983	0.936	0.842	0.01	1.081	1.034	0.932	0.964	0.01
TRUE	High	Master Protein	D3ZX63	Protein Wdr54 OS=Rattus norvegicus GN=Wdr54 PE=4 SV=1	0	FALSE	50.654	23	4	10	4	334	35.6	6.21	56.31	4			protein binding		500226; 103692166	ENSRNOG00000009324.5; ENSRNOG00000060514.1	Wdr54; LOC103692166	4				0	0																0.921	0.987	0.869	1.136	2.462
TRUE	High	Master Protein	P09527	Ras-related protein Rab-7a OS=Rattus norvegicus GN=Rab7a PE=1 SV=2	0	FALSE	50.613	26	4	68	4	207	23.5	6.7	293.31	4	cell organization and biogenesis;cellular homeostasis;metabolic process;regulation of biological process;response to stimulus;transport	cytoplasm;cytosol;endosome;Golgi;membrane;vacuole	catalytic activity;nucleotide binding;protein binding	Pf00025, Pf00071, Pf01926, Pf04670, Pf07728, Pf08477	29448	ENSRNOG00000012247.6	Rab7a	4	Tuberculosis; Phagosome; Endocytosis; Amoebiasis; Salmonella infection		MHC class II antigen presentation; TBC/RABGAPs; RAB GEFs exchange GTP for GDP on RABs; Neutrophil degranulation	15	0	1.053	0.958	0.941	1.061	0.449	1.073	1.018	0.995	1.091	1.413	1.097	1.027	1.015	1.088	1.114	1.06	0.981	1.013	1.045	1.074
TRUE	High	Master Protein	P04166	Cytochrome b5 type B OS=Rattus norvegicus GN=Cyb5b PE=1 SV=2	0	FALSE	50.535	37	4	80	4	146	16.3	5.06	357.13	4	metabolic process;regulation of biological process;transport	membrane;mitochondrion	enzyme regulator activity;metal ion binding	Pf00173	80773	ENSRNOG00000011142.7	Cyb5b	19			Phase I - Functionalization of compounds	3	0	0.968	1.407	0.834	1.236	0.01	0.962	1.173	0.927	1.064	0.319	0.946	1.268	0.954	1.106	0.669	0.93	1.244	0.892	1.063	1.433
TRUE	High	Master Protein	P09895	60S ribosomal protein L5 OS=Rattus norvegicus GN=Rpl5 PE=1 SV=3	0	FALSE	50.431	20	6	49	1	297	34.4	9.74	231.09	6	cell organization and biogenesis;metabolic process;regulation of biological process;response to stimulus	cytoplasm;membrane;nucleus;ribosome	protein binding;RNA binding;structural molecule activity	Pf00861, Pf14204	81763	ENSRNOG00000023529.3	Rpl5	14	Ribosome		SRP-dependent cotranslational protein targeting to membrane; Formation of a pool of free 40S subunits; Major pathway of rRNA processing in the nucleolus and cytosol; GTP hydrolysis and joining of the 60S ribosomal subunit; Nonsense Mediated Decay (NMD) enhanced by the Exon Junction Complex (EJC); Nonsense Mediated Decay (NMD) independent of the Exon Junction Complex (EJC); L13a-mediated translati…	16	6						0.984	1.019	1.006	0.974	0.953	0.911	0.991	0.999	1.026	1.743	0.851	0.965	0.982	0.988	0.922
TRUE	High	Master Protein	P30009	Myristoylated alanine-rich C-kinase substrate OS=Rattus norvegicus GN=Marcks PE=1 SV=2	0	FALSE	50.297	18	2	28	2	309	29.8	4.34	150.14	2	cell organization and biogenesis;regulation of biological process;transport	cytoplasm;cytoskeleton;cytosol;membrane;nucleus;vacuole	protein binding		25603		Marcks	20				0	0																0.895	0.808	0.668	0.978	0.01
TRUE	High	Master Protein	O35567	Bifunctional purine biosynthesis protein PURH OS=Rattus norvegicus GN=Atic PE=1 SV=2	0	FALSE	50.136	15	8	84	8	592	64.2	7.14	304.43	8	metabolic process;response to stimulus	membrane;mitochondrion	catalytic activity;protein binding	Pf01808, Pf02142	81643	ENSRNOG00000015511.4	Atic	9	One carbon pool by folate; Metabolic pathways; Antifolate resistance; Purine metabolism	One Carbon Metabolism	Purine ribonucleoside monophosphate biosynthesis	9	0	0.903	0.936	1.034	1.08	1.056	0.964	0.952	1.001	1.06	0.708	0.957	1.006	1.106	1.152	0.927	0.891	0.918	0.979	0.93	0.01
TRUE	High	Master Protein	P18265	Glycogen synthase kinase-3 alpha OS=Rattus norvegicus GN=Gsk3a PE=1 SV=1	0	FALSE	49.956	25	8	54	7	483	51	8.82	230.13	8	cellular component movement;metabolic process;regulation of biological process;response to stimulus	cytoplasm;cytosol;mitochondrion	catalytic activity;nucleotide binding;protein binding	Pf00069, Pf01636, Pf07714, Pf14531	50686	ENSRNOG00000020417.5	Gsk3a	1	Chemokine signaling pathway; Dopaminergic synapse; Non-alcoholic fatty liver disease (NAFLD)	Glycogen Metabolism; IL-3 Signaling Pathway; Insulin Signaling; IL-5 Signaling Pathway		7	1	0.859	1.221	1.07	0.935	0.01	0.831	1.212	1.082	0.904	0.01	1.099	1.11	1.165	0.988	0.01	1.043	0.962	1.043	0.886	0.01
TRUE	High	Master Protein	Q62656	Receptor-type tyrosine-protein phosphatase zeta OS=Rattus norvegicus GN=Ptprz1 PE=1 SV=1	0	FALSE	49.86	4	6	27	6	2316	255.2	4.88	101.05	6	cell differentiation;cell organization and biogenesis;metabolic process;regulation of biological process;response to stimulus	cytoplasm;extracellular;membrane	catalytic activity;protein binding	Pf00041, Pf00102, Pf00194, Pf14566	25613		Ptprz1	4				0	0						0.614	0.904	0.921	0.679	0.01	1.011	0.918	0.987	0.974	0.01	0.868	1.016	0.99	0.899	0.01
TRUE	High	Master Protein	B4F774	Ganglioside-induced differentiation-associated protein 1-like 1 (Predicted) OS=Rattus norvegicus GN=Gdap1l1 PE=2 SV=1	0	FALSE	49.78	18	5	66	5	366	41.7	6.6	296.45	5	metabolic process	cytoplasm;membrane	catalytic activity;protein binding	Pf00043, Pf02798, Pf13409, Pf13410, Pf13417	311616	ENSRNOG00000008790.7	Gdap1l1	3				0	0	1.172	1.016	0.994	0.969	0.921	1.052	0.966	0.969	0.91	0.449	1.136	1.073	0.925	0.775	0.01	1.176	1.096	0.933	0.808	1.635
TRUE	High	Master Protein	A0JN25	Microtubule-associated protein OS=Rattus norvegicus GN=Mapt PE=2 SV=1	0	FALSE	49.739	21	5	55	1	343	35.9	9.44	166.12	5	cell death;cell differentiation;cell growth;cell organization and biogenesis;cellular component movement;metabolic process;regulation of biological process;response to stimulus;transport	cytoplasm;cytoskeleton;cytosol;membrane;nucleus	DNA binding;protein binding	Pf00418	29477	ENSRNOG00000005133.9	Mapt	10	MAPK signaling pathway; Alzheimer's disease	IL-6 Signaling Pathway; MAPK signaling pathway	Caspase-mediated cleavage of cytoskeletal proteins	9	0
TRUE	High	Master Protein	B2GV06	Succinyl-CoA:3-ketoacid coenzyme A transferase 1, mitochondrial OS=Rattus norvegicus GN=Oxct1 PE=1 SV=1	0	FALSE	49.698	12	4	49	4	520	56.2	8.47	227.61	4	metabolic process;regulation of biological process;response to stimulus	mitochondrion;organelle lumen	catalytic activity;protein binding	Pf01144	690163	ENSRNOG00000043094.3	Oxct1	2	Synthesis and degradation of ketone bodies; Valine, leucine and isoleucine degradation; Butanoate metabolism	Synthesis and Degradation of Ketone Bodies	Utilization of Ketone Bodies	8	0	0.901	1.046	0.992	0.914	1.784	0.949	1.07	1.004	0.888	0.01	1.01	1.006	1	1.075	1.247	0.912	0.927	0.904	1.078	0.01
TRUE	High	Master Protein	P62703	40S ribosomal protein S4, X isoform OS=Rattus norvegicus GN=Rps4x PE=2 SV=2	0	FALSE	49.682	21	6	64	6	263	29.6	10.15	255.77	6	development;metabolic process;regulation of biological process;response to stimulus	cytoplasm;membrane;ribosome	RNA binding;structural molecule activity	Pf00900, Pf08071	100362640; 29426	ENSRNOG00000003201.9	LOC100362640; Rps4x; Rps4x-ps9	X; 4	Ribosome	Cytoplasmic Ribosomal Proteins	SRP-dependent cotranslational protein targeting to membrane; Formation of a pool of free 40S subunits; Translation initiation complex formation; Major pathway of rRNA processing in the nucleolus and cytosol; GTP hydrolysis and joining of the 60S ribosomal subunit; Formation of the ternary complex, and subsequently, the 43S complex; Ribosomal scanning and start codon recognition; Nonsense Mediated…	21	0	0.943	1.436	0.887	1.053	0.01	0.804	1.284	0.864	1.034	0.01	1.024	1.038	1.126	1.11	1.686	0.984	1.071	1.131	1.141	1.196
TRUE	High	Master Protein	Q9Z2S9	Flotillin-2 OS=Rattus norvegicus GN=Flot2 PE=1 SV=1	0	FALSE	49.482	25	8	32	8	428	47	5.2	120.14	8	cell organization and biogenesis;regulation of biological process	cytoskeleton;endosome;membrane	protein binding	Pf01145	83764	ENSRNOG00000009681.8	Flot2	10	Insulin signaling pathway	Insulin Signaling	Synaptic adhesion-like molecules	5	0	1.087	1.014	0.885	1.408	0.01	0.877	0.851	0.753	1.16	0.01	0.9	0.788	1.172	1.398	2.509	0.907	0.807	1.114	1.316	2.369
TRUE	High	Master Protein	M0R9Q1	Protein LOC100911677 OS=Rattus norvegicus GN=LOC100911677 PE=4 SV=1	0	FALSE	49.31	8	4	47	4	669	69.5	9.67	217.58	4	cell organization and biogenesis;metabolic process;regulation of biological process;response to stimulus	cytoplasm;nucleus	RNA binding	Pf00076, Pf13893, Pf14259	170900	ENSRNOG00000045568.3	LOC100911677; Rbm14	1			RUNX2 regulates bone development	5	0	0.969	1.023	1.074	1.029	1.689	0.913	0.987	1.059	0.986	1.644	1.002	0.936	1.085	1.131	0.01	0.937	1.209	0.961	1.116	0.01
TRUE	High	Master Protein	P68182	cAMP-dependent protein kinase catalytic subunit beta OS=Rattus norvegicus GN=Prkacb PE=1 SV=2	0	FALSE	49.18	15	4	48	4	351	40.7	8.56	169.23	4	metabolic process;regulation of biological process;response to stimulus	cytoplasm;cytosol;membrane;nucleus	catalytic activity;metal ion binding;nucleotide binding;protein binding	Pf00069, Pf07714, Pf14531	293508	ENSRNOG00000004978.6	Prkacb	2	GnRH signaling pathway; cAMP signaling pathway; GABAergic synapse; Chemokine signaling pathway; Morphine addiction; Ras signaling pathway; Inflammatory mediator regulation of TRP channels; Viral carcinogenesis; Renin secretion; Vascular smooth muscle contraction; Wnt signaling pathway; Calcium signaling pathway; Glutamatergic synapse; Glucagon signaling pathway; Hedgehog signaling pathway; Longev…	Myometrial Relaxation and Contraction Pathways; Calcium Regulation in the Cardiac Cell; G Protein Signaling Pathways	Signaling by GPCR; MAPK6/MAPK4 signaling; CREB phosphorylation through the activation of Adenylate Cyclase; CD209 (DC-SIGN) signaling; DARPP-32 events; Glucagon-like Peptide-1 (GLP1) regulates insulin secretion; Vasopressin regulates renal water homeostasis via Aquaporins; PKA activation in glucagon signalling; Factors involved in megakaryocyte development and platelet production; Rap1 signalling…	104	0	1.024	1.129	1.034	0.988	0.866	0.914	1.279	1.076	0.961	0.01	0.982	1.14	0.982	0.964	1.205	0.994	1.162	0.977	0.875	0.01
TRUE	High	Master Protein	Q2TA68	Dynamin-like 120 kDa protein, mitochondrial OS=Rattus norvegicus GN=Opa1 PE=1 SV=1	0	FALSE	49.108	10	9	38	9	960	111.2	7.53	113.45	9	cell death;cell organization and biogenesis;cellular homeostasis;metabolic process;regulation of biological process;response to stimulus;transport	cytosol;membrane;mitochondrion	catalytic activity;nucleotide binding;protein binding	Pf00350, Pf01926	171116	ENSRNOG00000001717.8	Opa1	11			Regulation of Apoptosis	3	0	1.193	1.097	0.992	0.963	0.984	1.078	1.079	0.963	0.997	1.833	0.832	1.125	1.15	0.953	0.01	0.818	1.18	0.992	0.914	0.01
TRUE	High	Master Protein	Q6AYR2	Protein NDRG3 OS=Rattus norvegicus GN=Ndrg3 PE=2 SV=1	0	FALSE	49.106	13	3	41	3	375	41.5	5.25	161.71	3	regulation of biological process;response to stimulus	cytoplasm		Pf00561, Pf03096, Pf12697	296318		Ndrg3	3				0	0																0.978	1.069	1.027	1.007	1.227
TRUE	High	Master Protein	Q9JLU4	SH3 and multiple ankyrin repeat domains protein 3 OS=Rattus norvegicus GN=Shank3 PE=1 SV=3	0	FALSE	49.083	8	9	41	9	1740	186.3	8.84	149.52	9	cell differentiation;cell organization and biogenesis;cellular homeostasis;metabolic process;regulation of biological process;response to stimulus	cytoplasm;membrane;nucleus	DNA binding;metal ion binding;protein binding;structural molecule activity	Pf00018, Pf00023, Pf00536, Pf02198, Pf07647, Pf07653, Pf12796, Pf13637, Pf13857, Pf14604	59312		Shank3	7	Glutamatergic synapse			1	0	0.84	0.996	1.011	0.949	2.542	0.907	0.866	0.804	0.935	0.878	0.954	1.135	1.013	1.202	1.981	0.919	1.206	0.989	1.176	2.628
TRUE	High	Master Protein	F1LRW9	Phosphatidylinositol 4-kinase alpha OS=Rattus norvegicus GN=Pi4ka PE=4 SV=2	0	FALSE	48.963	5	10	76	10	2044	231.7	7.01	233.83	10			catalytic activity	Pf00454, Pf00613								0	0	0.921	1.043	1.048	0.947	0.581	0.969	1.063	1.056	0.906	0.775	0.943	1.008	1.026	1.14	0.79	0.978	1.057	1.031	1.078	1.058
TRUE	High	Master Protein	Q5GFD9	Protein IMPACT OS=Rattus norvegicus GN=Impact PE=2 SV=1	0	FALSE	48.923	17	5	76	5	317	36	5.16	342.96	5	cell communication;cell differentiation;cell growth;regulation of biological process;response to stimulus	cytoplasm	protein binding	Pf01205, Pf05773	497198	ENSRNOG00000045844.2	Impact	18				0	0	1.02	1.082	1.015	1.194	0.892	1.103	1.089	1.121	1.244	0.426	1.049	1.177	1.224	1.365	0.01	1.087	1.248	1.231	1.31	0.775
TRUE	High	Master Protein	P63088	Serine/threonine-protein phosphatase PP1-gamma catalytic subunit OS=Rattus norvegicus GN=Ppp1cc PE=1 SV=1	0	FALSE	48.906	19	6	59	1	323	37	6.54	224.39	6	cell differentiation;cell division;metabolic process;regulation of biological process;response to stimulus	chromosome;cytoplasm;cytosol;membrane;mitochondrion;nucleus	catalytic activity;metal ion binding;protein binding;RNA binding	Pf00149	24669	ENSRNOG00000001269.6	Ppp1cc	12	cAMP signaling pathway; Alcoholism; Dopaminergic synapse; Vascular smooth muscle contraction; Oocyte meiosis; mRNA surveillance pathway; Oxytocin signaling pathway; Long-term potentiation; Proteoglycans in cancer; Regulation of actin cytoskeleton; Inflammatory mediator regulation of TRP channels; Focal adhesion; Amphetamine addiction; Adrenergic signaling in cardiomyocytes; Hippo signaling pathwa…		Resolution of Sister Chromatid Cohesion; Amplification of signal from unattached kinetochores via a MAD2 inhibitory signal; Separation of Sister Chromatids; RHO GTPases Activate Formins	36	0											0.796	1.268	1.073	0.774	0.01	0.861	1.23	1.087	0.867	0.01
TRUE	High	Master Protein	D4A746	GDP-mannose pyrophosphorylase B (Predicted), isoform CRA_a OS=Rattus norvegicus GN=Gmppb PE=4 SV=1	0	FALSE	48.849	12	3	27	3	360	39.9	6.74	123.81	3	metabolic process	cytoplasm;mitochondrion	catalytic activity	Pf00132, Pf00483, Pf12804	363145	ENSRNOG00000037229.2	Gmppb	8	Metabolic pathways; Amino sugar and nucleotide sugar metabolism; Fructose and mannose metabolism			3	0	1.003	0.971	0.976	0.925	1.221	1.002	0.936	0.963	0.88	0.993						0.969	0.953	1.037	0.898	0.01
TRUE	High	Master Protein	D3ZHP8	Protein Rpl5l1 OS=Rattus norvegicus GN=Rpl5l1 PE=3 SV=1	0	FALSE	48.821	23	6	52	1	297	34.4	9.7	238.99	6	cell organization and biogenesis;metabolic process	ribosome	RNA binding;structural molecule activity	Pf00861, Pf14204	501206	ENSRNOG00000037220.3	Rpl5l1	10		Cytoplasmic Ribosomal Proteins	SRP-dependent cotranslational protein targeting to membrane; Formation of a pool of free 40S subunits; Major pathway of rRNA processing in the nucleolus and cytosol; GTP hydrolysis and joining of the 60S ribosomal subunit; Nonsense Mediated Decay (NMD) enhanced by the Exon Junction Complex (EJC); Nonsense Mediated Decay (NMD) independent of the Exon Junction Complex (EJC); L13a-mediated translati…	16	0	1.013	0.988	1.062	1.054	1.384
TRUE	High	Master Protein	P51635	Alcohol dehydrogenase [NADP(+)] OS=Rattus norvegicus GN=Akr1a1 PE=1 SV=2	0	FALSE	48.765	28	6	72	6	325	36.5	7.31	273.09	6	metabolic process	cytosol;membrane	catalytic activity	Pf00248	78959	ENSRNOG00000016727.5	Akr1a1	5	Metabolic pathways; Pentose and glucuronate interconversions; Glycerolipid metabolism; Glycolysis / Gluconeogenesis	Metapathway biotransformation	Glutathione conjugation; Catabolism of glucuronate to xylulose-5-phosphate	11	0	1.029	1.067	1.01	1.034	1.032	1.012	1.059	1.022	1.039	1.165	0.972	1.013	1.038	0.981	1.855	1.015	1.041	1.039	1.026	1.748
TRUE	High	Master Protein	Q6IRJ7	Annexin OS=Rattus norvegicus GN=Anxa7 PE=2 SV=1	0	FALSE	48.761	20	9	59	9	463	50	6.18	184.65	9	cell differentiation;cell organization and biogenesis;cell proliferation;cellular homeostasis;metabolic process;regulation of biological process;response to stimulus	cytosol;membrane;nucleus	metal ion binding;protein binding;RNA binding	Pf00191	155423	ENSRNOG00000007136.6	Anxa7	15				0	0	1.011	1.064	1.107	0.967	0.01	0.686	1.17	1.035	0.82	0.01	0.95	1.173	1.049	1.358	0.01	1.144	1.078	1.078	0.892	1.631
TRUE	High	Master Protein	D3ZSM0	Uncharacterized protein OS=Rattus norvegicus PE=4 SV=2	0	FALSE	48.705	6	4	69	1	543	62.5	5.01	269.11	4	metabolic process;response to stimulus		nucleotide binding;protein binding	Pf00183, Pf13589								0	0	2.443	0.977	0.885	0.83	1.702	2.322	0.995	0.938	0.874	0.01	2.783	1.155	1.105	0.951	0.01	2.477	0.947	0.887	0.737	3.657
TRUE	High	Master Protein	P62749	Hippocalcin-like protein 1 OS=Rattus norvegicus GN=Hpcal1 PE=1 SV=2	0	FALSE	48.675	39	7	98	2	193	22.3	5.5	297.23	7		membrane	metal ion binding	Pf00036, Pf13202, Pf13405, Pf13499, Pf13833	50871	ENSRNOG00000005492.6	Hpcal1	6				0	0						0.919	1.186	1.181	1.229	2.324	0.905	1.086	1.041	1.287	0.01	0.949	1.143	1.11	1.241	0.01
TRUE	High	Master Protein	B2RZ72	Actin related protein 2/3 complex, subunit 4 (Predicted), isoform CRA_a OS=Rattus norvegicus GN=Arpc4 PE=2 SV=1	0	FALSE	48.605	29	4	96	4	168	19.7	8.43	402.28	4	cell organization and biogenesis;regulation of biological process	cytoplasm;cytoskeleton	protein binding;structural molecule activity	Pf05856	297518	ENSRNOG00000008994.5	Arpc4	4	Regulation of actin cytoskeleton; Salmonella infection; Bacterial invasion of epithelial cells; Fc gamma R-mediated phagocytosis; Endocytosis		Regulation of actin dynamics for phagocytic cup formation; RHO GTPases Activate WASPs and WAVEs; Clathrin-mediated endocytosis; EPHB-mediated forward signaling	20	0	1.001	0.946	1.052	0.966	1.057	0.998	0.968	1.076	0.997	1.222	1.048	0.965	1.114	1.009	1.089	1.043	0.973	1.069	0.969	0.442
TRUE	High	Master Protein	Q9ERB4	Versican core protein (Fragments) OS=Rattus norvegicus GN=Vcan PE=2 SV=2	0	FALSE	48.597	3	7	52	7	2738	299.8	4.58	219.17	7	cell differentiation;cell organization and biogenesis;cellular component movement;response to stimulus	cell surface;extracellular;membrane	metal ion binding;protein binding;structural molecule activity	Pf00008, Pf00059, Pf00084, Pf00193, Pf07645, Pf07974, Pf12947, Pf14670	114122		Vcan	2	Cell adhesion molecules (CAMs)			1	0	0.766	0.868	0.968	0.757	0.01	0.882	0.94	0.908	0.941	1.261	0.895	0.86	0.895	0.89	1.293	0.908	0.867	0.874	0.86	1.138
TRUE	High	Master Protein	Q62936	Disks large homolog 3 OS=Rattus norvegicus GN=Dlg3 PE=1 SV=1	0	FALSE	48.431	12	6	30	6	849	93.5	6.79	142.43	6	cell communication;cell organization and biogenesis;metabolic process;regulation of biological process	cytoplasm;membrane	catalytic activity;protein binding	Pf00018, Pf00595, Pf00625, Pf07653, Pf10600, Pf13180	58948	ENSRNOG00000002767.8	Dlg3	X	Hippo signaling pathway		Neurexins and neuroligins; Synaptic adhesion-like molecules; Activation of Ca-permeable Kainate Receptor	10	0	0.789	0.872	0.994	1.008	0.908	0.826	0.884	0.998	1.018	0.01	0.937	0.911	0.975	1.009	0.01	0.901	0.849	0.963	1.015	1.187
TRUE	High	Master Protein	Q5RK08	Glioblastoma amplified sequence OS=Rattus norvegicus GN=Gbas PE=2 SV=1	0	FALSE	48.372	25	6	38	6	281	32.9	9.36	150.03	6	metabolic process;regulation of biological process	cytoplasm;mitochondrion		Pf07978	498174	ENSRNOG00000023919.4	Gbas; Nipsnap2	12				0	0	1.025	1.036	1.103	0.984	1.337						1.019	1.006	1.016	0.827	0.911	0.999	0.937	1.028	0.777	0.501
TRUE	High	Master Protein	Q6P9V1	CD81 antigen OS=Rattus norvegicus GN=Cd81 PE=2 SV=1	0	FALSE	48.219	10	1	35	1	236	25.9	5.52	240.68	1	metabolic process;regulation of biological process;response to stimulus;transport	membrane	protein binding;receptor activity	Pf00335	25621	ENSRNOG00000020451.7	Cd81	1	Malaria; Hepatitis C; B cell receptor signaling pathway		Regulation of Complement cascade; Immunoregulatory interactions between a Lymphoid and a non-Lymphoid cell	9	0											0.882	0.807	0.911	1.3	0.01	1.223	0.944	0.88	1.296	1.63
TRUE	High	Master Protein	P17220	Proteasome subunit alpha type-2 OS=Rattus norvegicus GN=Psma2 PE=1 SV=3	0	FALSE	48.148	21	4	37	4	234	25.9	7.43	157.34	4	metabolic process;response to stimulus	cytoplasm;nucleus;proteasome	catalytic activity	Pf00227, Pf10584	29669	ENSRNOG00000049920.2	Psma2	17	Proteasome	Proteasome Degradation	Interleukin-1 family signaling; Neutrophil degranulation; Regulation of RUNX2 expression and activity; The role of GTSE1 in G2/M progression after G2 checkpoint; Ubiquitin Mediated Degradation of Phosphorylated Cdc25A; Asymmetric localization of PCP proteins; APC/C:Cdh1 mediated degradation of Cdc20 and other APC/C:Cdh1 targeted proteins in late mitosis/early G1; Regulation of PTEN stability and …	128	0	0.887	1.189	1.086	0.898	0.01	0.907	1.157	0.96	0.923	1.881	0.785	0.865	1.019	1.096	0.01	0.872	1.028	1.042	0.936	1.435
TRUE	High	Master Protein	Q6RJR6	Reticulon-3 OS=Rattus norvegicus GN=Rtn3 PE=1 SV=1	0	FALSE	47.95	9	7	53	6	940	101.5	5.11	180.13	7	cell death;cell organization and biogenesis;regulation of biological process;transport	endoplasmic reticulum;Golgi;membrane		Pf02453, Pf04093	140945	ENSRNOG00000021202.8	Rtn3	1	Alzheimer's disease		Synaptic adhesion-like molecules	4	1	0.949	1.023	1.007	0.976	0.789	0.934	1.019	0.94	0.982	0.01	0.897	0.932	0.885	0.899	0.01	0.851	0.97	0.949	0.887	0.01
TRUE	High	Master Protein	P13084	Nucleophosmin OS=Rattus norvegicus GN=Npm1 PE=1 SV=1	0	FALSE	47.935	16	3	28	3	292	32.5	4.77	149.54	3	cell growth;cell organization and biogenesis;cellular homeostasis;metabolic process;regulation of biological process;response to stimulus;transport	cytoplasm;cytoskeleton;cytosol;membrane;nucleus	DNA binding;enzyme regulator activity;nucleotide binding;protein binding;RNA binding	Pf03066	25498	ENSRNOG00000004616.8	Npm1	10				0	0	1.109	0.933	1.021	0.903	1.556	1.055	0.894	0.962	0.866	0.01	1.099	0.993	1.077	0.931	1.057	1.121	0.97	1.113	0.983	1.086
TRUE	High	Master Protein	Q99MZ8	LIM and SH3 domain protein 1 OS=Rattus norvegicus GN=Lasp1 PE=1 SV=1	0	FALSE	47.88	20	4	54	4	263	30	7.05	191.62	4	transport	cytoplasm;cytoskeleton	metal ion binding;protein binding;transporter activity	Pf00018, Pf00412, Pf00880, Pf07653, Pf14604	29278	ENSRNOG00000004132.7	Lasp1	10				0	0	0.984	0.949	1.152	1.08	1.371						0.994	0.847	1.058	0.949	1.353	1.001	0.87	1.063	0.986	0.926
TRUE	High	Master Protein	G3V6P7	Myosin, heavy polypeptide 9, non-muscle OS=Rattus norvegicus GN=LOC100911597 PE=4 SV=1	0	FALSE	47.873	5	9	76	5	1960	226.3	5.66	257.29	9	cell differentiation;cell organization and biogenesis;cellular component movement;cellular homeostasis;metabolic process;regulation of biological process;response to stimulus;transport	cytoplasm;cytoskeleton;cytosol;endosome;membrane;mitochondrion;nucleus	catalytic activity;motor activity;nucleotide binding;protein binding;RNA binding;transporter activity	Pf00063, Pf01496, Pf01576, Pf01765, Pf02736, Pf03962, Pf04111, Pf04156, Pf05266, Pf05911, Pf06637, Pf07888, Pf09726, Pf09731, Pf11068, Pf11559, Pf12128, Pf13094, Pf13166	100911597; 25745	ENSRNOG00000004860.6; ENSRNOG00000049236.2	LOC100911597; Myh9; Myh9l1	7	Regulation of actin cytoskeleton; Tight junction		RHO GTPases activate PAKs	6	1	1.104	1.059	1.06	1.2	1.156	1.01	1.033	1.009	1.104	0.628	1.072	1.01	0.981	1.054	0.936	1.09	0.932	0.941	1.044	0.871
TRUE	High	Master Protein	F1LQM9	Protein Xpo7 OS=Rattus norvegicus GN=Xpo7 PE=4 SV=2	0	FALSE	47.623	6	6	35	6	1090	124.1	6.4	140.58	6	transport	cytoplasm;nucleus	protein binding;transporter activity	Pf03810		ENSRNOG00000013288.7		15				0	0											1.065	1.071	1.049	1.137	3.083	1.113	0.985	1.094	1.183	0.01
TRUE	High	Master Protein	O54892	Mutant type II hexokinase OS=Rattus norvegicus GN=Hk2 PE=2 SV=1	0	FALSE	47.596	5	4	136	1	917	102.4	6.1	425.87	4	cell organization and biogenesis;cellular homeostasis;metabolic process;regulation of biological process;response to stimulus;transport	cytosol;membrane;mitochondrion	catalytic activity;nucleotide binding	Pf00349, Pf03727	25059		Hk2	4		Glycolysis and Gluconeogenesis		1	0						0.95	0.986	0.969	0.942	1.587
TRUE	High	Master Protein	A1L1J8	Protein Rab5b OS=Rattus norvegicus GN=Rab5b PE=2 SV=1	0	FALSE	47.519	33	5	75	2	215	23.7	8.13	263.45	5	cell organization and biogenesis;regulation of biological process;response to stimulus;transport	endosome;membrane	catalytic activity;nucleotide binding;protein binding	Pf00009, Pf00025, Pf00071, Pf04670, Pf08477	288779	ENSRNOG00000006130.7	Rab5b	7	Amoebiasis; Tuberculosis; Ras signaling pathway; Endocytosis; Vasopressin-regulated water reabsorption; Phagosome		Neutrophil degranulation	9	0											1.081	0.958	0.94	0.957	2.031	1.015	0.951	1.026	1.094	0.01
TRUE	High	Master Protein	O08873	MAP kinase-activating death domain protein OS=Rattus norvegicus GN=Madd PE=1 SV=1	0	FALSE	47.495	9	9	34	9	1602	177.9	6.04	128.32	9	cell death;regulation of biological process	cytoplasm;cytosol;membrane;nucleus	protein binding	Pf02141, Pf03455, Pf03456	94193	ENSRNOG00000012568.7	Madd	3			Regulation of TNFR1 signaling; RAB GEFs exchange GTP for GDP on RABs	8	0						1.079	0.825	0.936	0.671	0.788	1.1	1.068	0.95	0.957	1.088	1.086	0.999	0.918	0.88	1.276
TRUE	High	Master Protein	B2RYN0	Pgm3 protein OS=Rattus norvegicus GN=Pgm3 PE=2 SV=1	0	FALSE	47.425	11	5	36	5	542	59.6	6.24	130.06	5	metabolic process	cytosol	catalytic activity;metal ion binding	Pf00408, Pf02878, Pf02879	363109	ENSRNOG00000009515.7	Pgm3	8		Glucuronidation	Synthesis of UDP-N-acetyl-glucosamine	7	0	1.333	1.237	1.001	1.132	0.01	1.272	1.207	0.923	1.056	0.01	1.528	1.42	1.244	1.17	0.01	1.381	1.285	1.165	0.974	0.01
TRUE	High	Master Protein	F1LQI5	E3 ubiquitin-protein ligase UBR4 OS=Rattus norvegicus GN=Ubr4 PE=4 SV=1	0	FALSE	47.352	3	14	50	14	5194	573.4	6.05	153	14	metabolic process	cytosol;membrane	catalytic activity;metal ion binding;protein binding	Pf02207, Pf13764		ENSRNOG00000018183.7		5			Neutrophil degranulation	3	0	0.963	0.908	0.913	0.844	0.711	0.929	0.884	0.928	0.9	0.595	0.934	0.948	0.946	0.96	0.859	0.941	1.017	0.911	0.991	0.01
TRUE	High	Master Protein	Q6AY09	Heterogeneous nuclear ribonucleoprotein H2 OS=Rattus norvegicus GN=Hnrnph2 PE=1 SV=1	0	FALSE	47.198	23	7	57	4	449	49.3	6.3	191.49	7		cytosol;membrane;nucleus	RNA binding	Pf00076, Pf08080, Pf14259	308650	ENSRNOG00000011661.5	Hnrnph2	X		mRNA processing	mRNA Splicing - Major Pathway	5	4	0.896	1.097	1.132	1.048	0.01	0.947	1.144	1.063	0.977	0.01	0.981	1.148	1.022	0.996	0.01	0.987	1.098	1.004	1.013	0.01
TRUE	High	Master Protein	F1LNM0	Disks large homolog 1 OS=Rattus norvegicus GN=Dlg1 PE=4 SV=1	0	FALSE	47.17	10	9	44	6	911	100.5	5.95	156.99	9			protein binding	Pf00018, Pf00595, Pf00625, Pf07653, Pf09058, Pf10600, Pf10608, Pf13180		ENSRNOG00000038597.4		11			Trafficking of AMPA receptors; Synaptic adhesion-like molecules; Activation of Ca-permeable Kainate Receptor	10	0	0.985	0.939	1.025	0.987	0.961	0.989	0.977	0.999	1.008	1.447	1.013	0.984	0.982	1.005	1.255	1.012	1.045	0.995	1.006	1.56
TRUE	High	Master Protein	Q3MIE4	Synaptic vesicle membrane protein VAT-1 homolog OS=Rattus norvegicus GN=Vat1 PE=1 SV=1	0	FALSE	47.168	22	5	39	5	404	43.1	6.62	134.92	5	metabolic process;regulation of biological process	cytoplasm;membrane;mitochondrion	catalytic activity;metal ion binding	Pf00107, Pf08240, Pf13602	287721	ENSRNOG00000020684.5	Vat1	10			Neutrophil degranulation	3	0						0.973	1.131	1.026	1.006	3.213	1.106	1.179	1.039	1.16	1.562	1.06	1.115	1.023	1.042	0.897
TRUE	High	Master Protein	Q6QI16	LRRGT00192 OS=Rattus norvegicus GN=RGD1304704 PE=2 SV=1	0	FALSE	47.162	14	3	30	3	296	33.8	8.63	124.24	3	metabolic process;regulation of biological process	cytoplasm;nucleus	protein binding;RNA binding	Pf10036	302247	ENSRNOG00000000340.7	RGD1304704; Rtraf	15				0	0
TRUE	High	Master Protein	G3V6L8	RCG61894, isoform CRA_a OS=Rattus norvegicus GN=Strn PE=4 SV=1	0	FALSE	46.998	14	6	27	6	780	86.1	5.21	133.52	6	regulation of biological process;response to stimulus		protein binding	Pf00400, Pf08232		ENSRNOG00000004806.5		6				0	0	0.873	1.176	0.89	0.947	0.01	0.921	1.064	1.026	0.975	0.01	0.97	0.989	1.007	0.887	0.01	0.951	1.038	0.902	0.875	0.01
TRUE	High	Master Protein	F1M5M9	Protein Srgap3 OS=Rattus norvegicus GN=Srgap3 PE=4 SV=2	0	FALSE	46.995	6	5	46	3	1099	124.4	6.67	185.11	5	regulation of biological process;response to stimulus	cytoplasm	enzyme regulator activity;protein binding	Pf00018, Pf00611, Pf00620, Pf07653, Pf14604	500287	ENSRNOG00000006509.7	Srgap3	4	Axon guidance		Rho GTPase cycle	4	2	1.096	1.07	0.933	0.861	0.01	1.052	1.009	0.897	0.809	0.01	0.733	0.848	0.904	0.847	1.816	0.816	0.876	0.949	0.884	0.852
TRUE	High	Master Protein	Q9EPH8	Polyadenylate-binding protein 1 OS=Rattus norvegicus GN=Pabpc1 PE=1 SV=1	0	FALSE	46.767	11	6	70	5	636	70.7	9.5	273.09	6	metabolic process;regulation of biological process	cytoplasm;cytosol;membrane;nucleus;spliceosomal complex	protein binding;RNA binding	Pf00076, Pf00658, Pf13893, Pf14259	171350	ENSRNOG00000008639.7	Pabpc1	7	RNA degradation; RNA transport; mRNA surveillance pathway	Translation Factors	Translation initiation complex formation; AUF1 (hnRNP D0) binds and destabilizes mRNA; Nonsense Mediated Decay (NMD) enhanced by the Exon Junction Complex (EJC); Nonsense Mediated Decay (NMD) independent of the Exon Junction Complex (EJC); L13a-mediated translational silencing of Ceruloplasmin expression; Deadenylation of mRNA	19	1	0.909	0.976	1.003	1.098	1.282	0.905	1.063	1.074	1.051	0.982	0.943	0.92	1	1.017	0.819	0.956	0.937	1.05	1.111	0.729
TRUE	High	Master Protein	Q5BJU7	Wiskott-Aldrich syndrome protein family member 1 OS=Rattus norvegicus GN=Wasf1 PE=1 SV=1	0	FALSE	46.626	15	6	27	6	559	61.5	6.37	94.77	6	cell growth;cell organization and biogenesis;regulation of biological process;response to stimulus;transport	cytoplasm;cytoskeleton;membrane;mitochondrion	protein binding	Pf02205	294568	ENSRNOG00000047476.2	Wasf1	20	Fc gamma R-mediated phagocytosis; Regulation of actin cytoskeleton; Salmonella infection; Adherens junction; Bacterial invasion of epithelial cells; Choline metabolism in cancer	Regulation of Actin Cytoskeleton; Cardiovascular Signaling		8	0	0.986	1.064	1.085	0.988	0.01	0.939	0.901	1.062	0.917	0.01
TRUE	High	Master Protein	Q6IE67	Proteasome subunit alpha type OS=Rattus norvegicus GN=LOC100361067 PE=2 SV=1	0	FALSE	46.608	15	4	39	4	255	28.3	5.33	148.92	4	metabolic process;regulation of biological process	cytoplasm;nucleus;proteasome	catalytic activity	Pf00227, Pf10584	100361067; 408248		LOC100361067; Psma3l	10				0	0	0.968	1.129	1.029	0.99	1.041	1.049	1.156	1.038	0.939	1.059	2.365	1.586	0.952	1.017	0.01	0.898	1.145	0.939	0.761	3.346
TRUE	High	Master Protein	P40329	Arginine--tRNA ligase, cytoplasmic OS=Rattus norvegicus GN=Rars PE=1 SV=2	0	FALSE	46.512	6	3	42	3	660	75.8	7.05	189.73	3	metabolic process	cytoplasm;cytosol;membrane;mitochondrion;nucleus	catalytic activity;nucleotide binding;protein binding;RNA binding	Pf00750, Pf03485, Pf05746	287191	ENSRNOG00000007739.6	Rars	10	Aminoacyl-tRNA biosynthesis			1	0	1.006	0.919	1.028	1.14	0.904	1.064	0.983	1.021	1.155	1.444	1.034	0.978	1.115	1.166	0.01	1.063	0.967	1.033	0.935	1.934
TRUE	High	Master Protein	Q5EBA4	Nipsnap1 protein (Fragment) OS=Rattus norvegicus GN=Nipsnap1 PE=2 SV=1	0	FALSE	46.428	24	6	44	6	283	33.2	9.38	174.16	6		membrane;mitochondrion		Pf07978	360971		Nipsnap1	14				0	0	0.958	0.954	1.122	1.177	1.509	1.017	0.961	1.12	1.17	1.455	0.975	0.974	1.091	1.059	3.189	0.945	0.947	1.206	1.248	2.348
TRUE	High	Master Protein	P00388	NADPH--cytochrome P450 reductase OS=Rattus norvegicus GN=Por PE=1 SV=3	0	FALSE	46.312	16	8	42	8	678	76.9	5.48	136.59	8	metabolic process;regulation of biological process;response to stimulus	endoplasmic reticulum;membrane;mitochondrion	catalytic activity;nucleotide binding;protein binding	Pf00175, Pf00258, Pf00667	29441	ENSRNOG00000001442.3	Por	12			Cytochrome P450 - arranged by substrate type	4	0	1.034	1.049	0.898	0.939	1.072	1.042	0.977	0.98	1.048	1.946	1.068	1.097	0.994	1.134	1.562	1.051	0.994	0.982	0.971	3.146
TRUE	High	Master Protein	F1M9A2	Sodium/calcium exchanger 2 OS=Rattus norvegicus GN=Slc8a2 PE=4 SV=2	0	FALSE	46.242	9	5	40	5	920	100.3	5.15	153.45	5	cell communication;transport			Pf01699, Pf03160								0	0	1.173	1.01	0.966	0.912	1.096	0.98	0.947	0.9	0.887	1.763	0.977	0.979	0.995	0.926	0.731	0.929	0.919	0.99	0.822	0.01
TRUE	High	Master Protein	Q5XFX0	Transgelin-2 OS=Rattus norvegicus GN=Tagln2 PE=2 SV=1	0	FALSE	46.219	23	4	40	2	199	22.4	8.25	104.57	4	cell differentiation		protein binding	Pf00307, Pf00402	304983	ENSRNOG00000008301.7	Tagln2	13			Platelet degranulation	4	0											1.017	1.366	1.024	1.111	2.113	0.959	1.217	1.005	1.088	0.01
TRUE	High	Master Protein	P11884	Aldehyde dehydrogenase, mitochondrial OS=Rattus norvegicus GN=Aldh2 PE=1 SV=1	0	FALSE	46.092	13	6	65	1	519	56.5	7.05	236.18	6	metabolic process;regulation of biological process;response to stimulus	mitochondrion;organelle lumen	catalytic activity;nucleotide binding;protein binding	Pf00171	29539		Aldh2	12	Valine, leucine and isoleucine degradation; Histidine metabolism; Glycerolipid metabolism; Tryptophan metabolism; Lysine degradation; Glycolysis / Gluconeogenesis; Ascorbate and aldarate metabolism; Arginine and proline metabolism; Pyruvate metabolism; Pentose and glucuronate interconversions; Metabolic pathways; Fatty acid degradation; beta-Alanine metabolism	Fatty Acid Omega Oxidation; Tryptophan metabolism		15	0	0.805	0.852	0.895	0.981	0.963	0.867	0.888	0.948	0.999	0.964	1.065	1.102	0.858	0.955	0.01	1.428	1.39	0.818	0.816	0.01
TRUE	High	Master Protein	F1M4K6	Leucine-rich repeat-containing protein 7 (Fragment) OS=Rattus norvegicus GN=Lrrc7 PE=4 SV=2	0	FALSE	46.073	6	6	25	6	1494	167.1	6.51	103.32	6			protein binding	Pf00595, Pf12799, Pf13180, Pf13855								0	0											0.946	0.944	0.886	1.009	2.109	0.84	0.966	0.889	0.964	0.01
TRUE	High	Master Protein	P19643	Amine oxidase [flavin-containing] B OS=Rattus norvegicus GN=Maob PE=1 SV=3	0	FALSE	46.057	11	5	28	5	520	58.4	8.21	98.32	5	metabolic process;regulation of biological process;response to stimulus	membrane;mitochondrion	catalytic activity;nucleotide binding;protein binding	Pf00070, Pf00890, Pf01266, Pf01494, Pf01593, Pf01946, Pf03486, Pf07992, Pf12831, Pf13450	25750	ENSRNOG00000029778.5	Maob	X	Metabolic pathways; Serotonergic synapse; Arginine and proline metabolism; Glycine, serine and threonine metabolism; Dopaminergic synapse; Cocaine addiction; Drug metabolism - cytochrome P450; Histidine metabolism; Phenylalanine metabolism; Alcoholism; Tryptophan metabolism; Amphetamine addiction; Tyrosine metabolism	Tryptophan metabolism	Biogenic amines are oxidatively deaminated to aldehydes by MAOA and MAOB	19	0	0.882	1.478	0.991	1.579	0.01	0.959	0.917	1.101	1.083	1.82	1.006	1.104	0.982	0.97	0.01	0.917	0.875	1.141	1.083	3.089
TRUE	High	Master Protein	D4A817	Histone H2B OS=Rattus norvegicus GN=Hist1h2bh PE=3 SV=2	0	FALSE	45.944	32	4	205	2	126	13.9	10.32	794.23	4			DNA binding	Pf00125, Pf00808								0	0	0.672	1.049	0.875	0.556	0.01	0.701	1.131	0.936	0.559	0.01	0.643	1.071	0.974	0.593	0.01	0.667	1.163	0.987	0.586	0.01
TRUE	High	Master Protein	P67779	Prohibitin OS=Rattus norvegicus GN=Phb PE=1 SV=1	0	FALSE	45.936	25	7	85	7	272	29.8	5.76	320.59	7	cell differentiation;cell organization and biogenesis;metabolic process;regulation of biological process;response to stimulus	cell surface;cytoplasm;endosome;membrane;mitochondrion;nucleus	DNA binding;protein binding	Pf01145	25344	ENSRNOG00000046799.2	Phb	10				0	0	0.881	1.032	0.943	0.9	0.898	0.954	0.96	1.015	0.951	1.468	0.942	0.925	1.002	0.969	0.456	0.936	0.958	1.017	0.998	1.134
TRUE	High	Master Protein	B2RZ24	Sucla2 protein (Fragment) OS=Rattus norvegicus GN=Sucla2 PE=2 SV=1	0	FALSE	45.905	13	7	110	7	438	47.4	6.46	340.7	7	metabolic process	mitochondrion	catalytic activity;metal ion binding;nucleotide binding	Pf00549, Pf02222, Pf02786, Pf08442, Pf13535, Pf13549	361071		Sucla2	15		TCA Cycle		1	0	1.148	0.958	1.23	0.996	1.881	1.059	0.963	1.106	0.993	1.08	0.948	0.909	0.938	0.901	0.692	0.961	0.905	0.934	0.858	0.788
TRUE	High	Master Protein	Q9WUS0	Adenylate kinase 4, mitochondrial OS=Rattus norvegicus GN=Ak4 PE=2 SV=1	0	FALSE	45.819	28	5	76	5	223	25.2	8.02	295.74	5	metabolic process;response to stimulus	mitochondrion;organelle lumen	catalytic activity;nucleotide binding	Pf00406, Pf05191, Pf13207, Pf13238, Pf13671	29223	ENSRNOG00000045738.2	Ak4	5	Purine metabolism; Metabolic pathways; Thiamine metabolism		Interconversion of nucleotide di- and triphosphates	6	0	1.02	1.083	0.974	0.949	0.423	1.048	1.158	1	1.165	0.892	1.038	1.075	0.987	1.073	2.481	1.025	1.102	0.983	1.128	1.503
TRUE	High	Master Protein	F1M4I4	Protein Vps51 OS=Rattus norvegicus GN=Vps51 PE=4 SV=2	0	FALSE	45.789	10	7	59	7	781	86	6.24	205.66	7	cell organization and biogenesis;metabolic process;transport	cytosol;endosome;Golgi;membrane	protein binding	Pf04124, Pf06148, Pf08700, Pf15469		ENSRNOG00000020996.8		1			Retrograde transport at the Trans-Golgi-Network	4	0	1.096	0.986	0.955	0.938	0.01	1.177	1.028	1.091	0.99	1.304	1.019	1	1.046	0.994	0.845	1.099	0.988	1.03	0.983	2.123
TRUE	High	Master Protein	Q8CG45	Aflatoxin B1 aldehyde reductase member 2 OS=Rattus norvegicus GN=Akr7a2 PE=1 SV=2	0	FALSE	45.658	28	8	45	8	367	40.6	8.1	144.24	8	metabolic process	cytoplasm;cytosol;Golgi;mitochondrion	catalytic activity	Pf00248	171445		Akr7a2	5	Metabolism of xenobiotics by cytochrome P450	Metapathway biotransformation; Aflatoxin B1 metabolism		3	0	0.96	1.099	1.081	0.969	1.398	0.978	1.072	1.014	1.054	0.759	0.977	1.014	0.877	0.931	2.962	1.045	1.137	1.042	1.039	1.752
TRUE	High	Master Protein	A3E0T0	Erythrocyte protein band 4.1-like 3 OS=Rattus norvegicus GN=Epb41l3 PE=2 SV=1	0	FALSE	45.608	9	8	53	5	870	96.9	5.29	182.97	8	cell organization and biogenesis;regulation of biological process	cytoskeleton;membrane	protein binding;structural molecule activity	Pf00373, Pf04382, Pf05902, Pf08736, Pf09379, Pf09380	116724	ENSRNOG00000016724.8	Epb41l3	9			Neurexins and neuroligins	3	2	1.024	1.033	0.994	0.989	1.117	0.978	1.047	1.009	1.021	0.473	1.014	1.142	1.056	1.06	0.01	0.986	1.135	1.004	0.906	1.757
TRUE	High	Master Protein	D3ZJ01	Protein RGD1307235 OS=Rattus norvegicus GN=RGD1307235 PE=4 SV=1	0	FALSE	45.524	11	8	31	8	1218	134.6	5.3	125.09	8			protein binding		309053	ENSRNOG00000015508.5	RGD1307235	13				0	0	1.024	0.97	0.872	0.886	0.989	1.063	0.95	1.023	0.982	0.01	0.998	1.025	0.965	1.001	0.01	1.074	0.894	0.92	0.849	0.01
TRUE	High	Master Protein	Q9JLA3	UDP-glucose:glycoprotein glucosyltransferase 1 OS=Rattus norvegicus GN=Uggt1 PE=1 SV=2	0	FALSE	45.497	7	9	37	9	1551	176.3	5.66	129.3	9	metabolic process;regulation of biological process;response to stimulus	endoplasmic reticulum;organelle lumen	catalytic activity;protein binding	Pf06427	171129	ENSRNOG00000014901.5	Uggt1	9	Protein processing in endoplasmic reticulum		ER Quality Control Compartment (ERQC)	7	0						1.093	1	1.035	1.021	0.868	1.076	1.014	1.003	0.921	0.724	1.08	1.022	1.019	0.931	1.063
TRUE	High	Master Protein	Q8SEZ0	NADH-ubiquinone oxidoreductase chain 5 OS=Rattus norvegicus GN=Mt-nd5 PE=3 SV=1	0	FALSE	45.394	3	1	73	1	609	68.6	9.26	376.12	1	metabolic process;response to stimulus;transport	membrane;mitochondrion	catalytic activity	Pf00361, Pf00662, Pf06455	26202	ENSRNOG00000029971.3	ND5	MT	Metabolic pathways; Parkinson's disease; Oxidative phosphorylation	Oxidative phosphorylation; Electron Transport Chain	Complex I biogenesis	10	0	1.016	0.973	0.915	0.892	0.434	0.965	0.947	0.96	0.889	0.904	1.096	0.977	0.952	0.794	0.688	1.016	0.808	0.938	0.775	0.827
TRUE	High	Master Protein	D3ZNZ9	Histone H2B OS=Rattus norvegicus GN=Hist3h2ba PE=3 SV=1	0	FALSE	45.387	32	4	181	2	126	14	10.37	733.51	4	cell organization and biogenesis	chromosome;nucleus	DNA binding;protein binding	Pf00125, Pf00808	303175	ENSRNOG00000043419.1	Hist3h2ba	10	Viral carcinogenesis; Systemic lupus erythematosus; Alcoholism			3	3	1.02	1.056	1.05	1.159	1.431	1.012	1.056	1.056	1.11	1.498	1.036	1.117	1.039	1.084	1.328	1.028	1.105	1.069	1.082	1.451
TRUE	High	Master Protein	O70351	3-hydroxyacyl-CoA dehydrogenase type-2 OS=Rattus norvegicus GN=Hsd17b10 PE=1 SV=3	0	FALSE	45.334	23	5	66	5	261	27.2	8.78	213.39	5	cell differentiation;cell organization and biogenesis;metabolic process	endoplasmic reticulum;membrane;mitochondrion	catalytic activity;nucleotide binding;protein binding;RNA binding	Pf00106, Pf08659, Pf13561	63864		Hsd17b10	X	Alzheimer's disease; Metabolic pathways; Valine, leucine and isoleucine degradation	Tryptophan metabolism		4	0	1.024	1.011	1.02	1.254	2.44	1.206	1.169	1.013	0.861	1.364	0.907	1.111	1.049	1.182	0.01	0.972	1.023	0.966	1.011	2.99
TRUE	High	Master Protein	Q499T3	Sirpa protein OS=Rattus norvegicus GN=Sirpa PE=2 SV=1	0	FALSE	45.293	10	4	76	4	513	56.1	7.44	319.3	4	cell differentiation;cell organization and biogenesis;cellular component movement;regulation of biological process	membrane	protein binding	Pf00047, Pf07654, Pf07679, Pf07686, Pf08205, Pf13895, Pf13927	25528	ENSRNOG00000004763.7	Sirpa	3		IL-1 Signaling Pathway		1	0	1.004	1.104	0.997	0.957	0.532	0.938	1.023	1.014	1.062	0.56	1.028	1.094	1.012	0.943	0.01	0.988	1.082	0.997	1.016	0.01
TRUE	High	Master Protein	P32736	Opioid-binding protein/cell adhesion molecule OS=Rattus norvegicus GN=Opcml PE=1 SV=2	0	FALSE	45.208	17	6	58	3	345	38	6.87	194.63	6		membrane	protein binding	Pf00047, Pf07679, Pf13895, Pf13927	116597		Opcml	8				0	0	0.779	0.85	0.928	0.856	0.01	0.696	0.876	0.996	0.882	0.01	0.877	0.864	0.92	0.808	0.01	0.833	0.777	0.922	0.775	0.781
TRUE	High	Master Protein	Q6P6V0	Glucose-6-phosphate isomerase OS=Rattus norvegicus GN=Gpi PE=1 SV=1	0	FALSE	45.126	11	8	150	8	558	62.8	7.77	436.99	8	metabolic process;regulation of biological process;response to stimulus	cytoplasm;cytosol;extracellular;membrane	catalytic activity;protein binding	Pf00342	292804	ENSRNOG00000023150.5	Gpi	1	Amino sugar and nucleotide sugar metabolism; Glycolysis / Gluconeogenesis; Starch and sucrose metabolism; Carbon metabolism; Metabolic pathways; Pentose phosphate pathway	Glycolysis and Gluconeogenesis; Hexoses metabolism in proximal tubules	TP53 Regulates Metabolic Genes; Neutrophil degranulation; Gluconeogenesis; Glycolysis	21	0	0.995	1.087	0.969	0.791	0.227	0.944	1.028	0.943	0.829	0.234	1.072	1.157	0.953	0.854	0.01	1.068	1.234	1.045	0.957	1.238
TRUE	High	Master Protein	Q5D059	Hnrpk protein OS=Rattus norvegicus GN=Hnrnpk PE=2 SV=1	0	FALSE	45.083	10	4	67	4	464	51	5.33	251.91	4	cellular homeostasis;defense response;metabolic process;regulation of biological process;response to stimulus	cytosol;membrane;mitochondrion;nucleus;spliceosomal complex	DNA binding;protein binding;RNA binding	Pf00013, Pf08067, Pf13014, Pf13083	117282	ENSRNOG00000019113.7	Hnrnpk	17		mRNA processing		1	0	0.882	0.975	1.062	0.948	0.644	0.875	1.025	1.027	0.928	0.503	0.894	1.187	1.063	0.896	2.173	0.934	1.04	0.998	0.965	0.01
TRUE	High	Master Protein	A8WCF8	Tumor protein p63-regulated gene 1-like protein OS=Rattus norvegicus GN=Tprg1l PE=1 SV=1	0	FALSE	45.032	32	6	24	6	266	29.8	7.37	97.06	6		membrane	protein binding	Pf12456	687090	ENSRNOG00000046227.2	LOC687090; Tprg1l	5				0	0																0.944	0.945	0.994	1.079	0.01
TRUE	High	Master Protein	B0BNK1	Protein Rab5c OS=Rattus norvegicus GN=Rab5c PE=2 SV=1	0	FALSE	45.02	21	4	71	1	216	23.4	8.41	260.34	4	cell organization and biogenesis;regulation of biological process;response to stimulus;transport	endosome;membrane	catalytic activity;nucleotide binding	Pf00009, Pf00025, Pf00071, Pf04670, Pf08477	287709	ENSRNOG00000018568.6	Rab5c	10	Endocytosis; Tuberculosis; Vasopressin-regulated water reabsorption; Ras signaling pathway; Amoebiasis; Phagosome		Golgi Associated Vesicle Biogenesis; Neutrophil degranulation	14	0						1.012	0.91	1.094	1.081	2.337	1.02	0.957	1.015	1.103	0.904	1.076	1.007	1.008	1.102	1.427
TRUE	High	Master Protein	Q7TQ85	Ac1164 OS=Rattus norvegicus GN=Pdhx PE=2 SV=1	0	FALSE	44.885	9	4	54	4	539	58.8	8.53	181.74	4	metabolic process	extracellular;mitochondrion	catalytic activity	Pf00198, Pf02817, Pf07174	311254	ENSRNOG00000006947.7	Pdhx	3	Metabolic pathways	Glycolysis and Gluconeogenesis; TCA Cycle; Hexoses metabolism in proximal tubules	Glyoxylate metabolism and glycine degradation; Signaling by Retinoic Acid; Regulation of pyruvate dehydrogenase (PDH) complex	14	0	0.921	1.052	1.087	0.951	1.359	1	1.038	1.033	1.092	1.188	1.037	0.949	1.094	0.997	0.01	1.022	1.024	1.074	1.008	0.01
TRUE	High	Master Protein	Q924S5	Lon protease homolog, mitochondrial OS=Rattus norvegicus GN=Lonp1 PE=2 SV=1	0	FALSE	44.851	11	12	58	11	950	105.7	6.6	192.6	12	cell organization and biogenesis;metabolic process;response to stimulus	cytosol;membrane;mitochondrion;nucleus;organelle lumen	catalytic activity;DNA binding;nucleotide binding;protein binding;RNA binding	Pf00004, Pf00910, Pf02190, Pf05362, Pf05496, Pf07724, Pf07726, Pf07728, Pf08298, Pf13173, Pf13191, Pf13207, Pf13401, Pf13541	170916	ENSRNOG00000046502.1	Lonp1	9				0	1	0.989	0.951	0.954	0.982	0.563						1.046	1.164	1.068	0.982	1.014	1.11	1.192	0.921	0.873	0.676
TRUE	High	Master Protein	Q6IRH6	Slc25a3 protein OS=Rattus norvegicus GN=Slc25a3 PE=2 SV=1	0	FALSE	44.68	15	5	85	5	357	39.6	9.29	247.21	5	transport	membrane;mitochondrion	protein binding;transporter activity	Pf00153	245959	ENSRNOG00000008289.7	Slc25a3	7				0	0	0.92	1.014	0.967	0.981	0.01	0.931	1.041	0.976	0.921	0.01	1.187	1.337	1.142	0.997	0.01	1.066	1.236	0.983	0.875	0.01
TRUE	High	Master Protein	D4A5Q9	Glycine decarboxylase (Predicted), isoform CRA_a OS=Rattus norvegicus GN=Gldc PE=4 SV=1	0	FALSE	44.651	10	5	23	5	884	98.5	6.64	123.7	5	metabolic process	membrane;mitochondrion;nucleus	catalytic activity;protein binding	Pf01212, Pf02347	309312	ENSRNOG00000011599.7	Gldc	1	Carbon metabolism; Glycine, serine and threonine metabolism; Glyoxylate and dicarboxylate metabolism; Metabolic pathways		Glycine degradation	8	0											0.954	1.09	1.094	0.976	1.762	0.953	1.033	1.051	0.96	0.01
TRUE	High	Master Protein	D3ZJF4	Uncharacterized protein (Fragment) OS=Rattus norvegicus GN=LOC100360986 PE=4 SV=2	0	FALSE	44.51	26	6	79	1	318	33.2	8.12	313.24	6				Pf00076, Pf13893, Pf14259								0	0
TRUE	High	Master Protein	Q6P9U7	L-lactate dehydrogenase OS=Rattus norvegicus GN=Ldha PE=2 SV=1	0	FALSE	44.429	25	8	119	4	270	29.8	9.06	354.91	8	cell communication;metabolic process;regulation of biological process;response to stimulus	cytoplasm;cytosol;membrane;mitochondrion;nucleus	catalytic activity;nucleotide binding;protein binding	Pf00056, Pf02866	24533		Ldha	1		Glycolysis and Gluconeogenesis; Hexoses metabolism in proximal tubules		2	4	0.936	0.913	0.871	0.845	0.582	0.961	0.954	0.939	0.872	0.705	0.916	0.946	0.891	0.736	0.01	0.886	0.927	0.865	0.713	0.01
TRUE	High	Master Protein	G3V918	Phosphoribosylglycinamide formyltransferase, isoform CRA_a OS=Rattus norvegicus GN=Gart PE=3 SV=1	0	FALSE	44.405	10	8	23	8	1010	107.5	6.61	89.62	8	metabolic process;response to stimulus	cytoplasm	catalytic activity;metal ion binding;nucleotide binding	Pf00551, Pf00586, Pf01071, Pf02222, Pf02593, Pf02769, Pf02843, Pf02844, Pf03435, Pf08442, Pf13535, Pf15632	288259	ENSRNOG00000028292.4	Gart	11	Metabolic pathways; One carbon pool by folate; Antifolate resistance; Purine metabolism	One Carbon Metabolism	Purine ribonucleoside monophosphate biosynthesis	9	0						1.076	1.058	0.96	0.987	1.412	1.039	0.954	0.885	0.843	0.01	1.124	1.039	1.021	1.144	0.01
TRUE	High	Master Protein	B0BMV5	RAB8B, member RAS oncogene family OS=Rattus norvegicus GN=Rab8b PE=2 SV=1	0	FALSE	44.37	25	5	55	3	207	23.6	9.07	171.7	5	cell organization and biogenesis;regulation of biological process;response to stimulus;transport	endosome;membrane;mitochondrion	catalytic activity;nucleotide binding;protein binding	Pf00025, Pf00071, Pf08477	266688	ENSRNOG00000018009.6	Rab8b	8			TBC/RABGAPs	4	0											1.023	0.994	1.021	1.084	1.958	0.779	0.948	1.143	0.885	0.01
TRUE	High	Master Protein	B1VKB4	Synaptopodin OS=Rattus norvegicus GN=Synpo PE=2 SV=1	0	FALSE	44.353	13	8	47	8	905	96.7	9.66	180.01	8	regulation of biological process;response to stimulus	cytoskeleton;nucleus	protein binding		60324		Synpo	18				0	0	0.868	1.116	0.886	1.149	0.01	0.752	0.985	0.946	0.929	0.01	0.798	0.905	0.823	0.868	0.01	0.851	0.94	0.93	0.931	1.426
TRUE	High	Master Protein	Q63413	Spliceosome RNA helicase Ddx39b OS=Rattus norvegicus GN=Ddx39b PE=1 SV=3	0	FALSE	44.161	17	7	74	2	428	49	5.67	236.9	7	cell organization and biogenesis;metabolic process;regulation of biological process;response to stimulus;transport	cytoplasm;nucleus;spliceosomal complex	catalytic activity;nucleotide binding;protein binding;RNA binding	Pf00270, Pf00271, Pf14617	114612	ENSRNOG00000000841.7	Ddx39b	20	Spliceosome; Influenza A; RNA transport; mRNA surveillance pathway		Cleavage of Growing Transcript in the Termination Region ; Transport of Mature mRNA derived from an Intron-Containing Transcript; mRNA 3'-end processing	13	5	1.006	0.999	0.959	0.929	0.959	1.046	1.028	0.993	0.945	1.274	1.091	0.999	1.007	0.887	0.01	1.046	1.075	0.982	0.879	0.01
TRUE	High	Master Protein	P47727	Carbonyl reductase [NADPH] 1 OS=Rattus norvegicus GN=Cbr1 PE=1 SV=2	0	FALSE	44.15	26	7	76	6	277	30.6	8.06	238.68	7	cell differentiation;metabolic process;response to stimulus	cytoplasm;membrane;nucleus	catalytic activity;protein binding	Pf00106, Pf08659, Pf13561	29224		Cbr1	11	Arachidonic acid metabolism; Metabolism of xenobiotics by cytochrome P450; Chemical carcinogenesis; Metabolic pathways			4	1	1.193	1.045	0.963	0.988	0.747	1.135	1.026	0.926	0.956	0.711	1.092	1.009	0.945	0.955	1.015	1.139	1.007	0.937	0.912	1.184
TRUE	High	Master Protein	D3ZN21	Protein RGD1309586 OS=Rattus norvegicus GN=RGD1309586 PE=4 SV=1	0	FALSE	44.126	11	6	53	1	659	72.9	7.03	189.27	6	metabolic process;regulation of biological process	cytosol;membrane;nucleus	catalytic activity;DNA binding;nucleotide binding	Pf00270, Pf00271, Pf04851	364073	ENSRNOG00000002501.4	RGD1309586; Ddx3y	13	RIG-I-like receptor signaling pathway; Hepatitis B; Viral carcinogenesis		Neutrophil degranulation	6	5	1.024	0.966	0.991	1.042	1.396	1.012	0.995	0.971	1.066	0.903	1.042	0.991	0.988	1.139	0.812	0.952	1.223	0.953	0.929	0.01
TRUE	High	Master Protein	D3ZD73	Protein Ddx6 OS=Rattus norvegicus GN=Ddx6 PE=4 SV=1	0	FALSE	44.07	20	7	27	7	483	54.2	8.66	88.84	7	cell organization and biogenesis;metabolic process;regulation of biological process	cytoplasm;cytosol;membrane;mitochondrion;nucleus	catalytic activity;nucleotide binding;protein binding;RNA binding	Pf00270, Pf00271, Pf14617	500988	ENSRNOG00000053932.1	Ddx6	8	RNA degradation		mRNA decay by 5' to 3' exoribonuclease	4	0	0.948	1.033	0.97	0.919	0.01	1.081	1.295	0.949	0.922	0.01	1.071	0.957	0.87	1.002	0.01	1.149	1.105	0.901	0.934	0.01
TRUE	High	Master Protein	P56574	Isocitrate dehydrogenase [NADP], mitochondrial OS=Rattus norvegicus GN=Idh2 PE=1 SV=2	0	FALSE	43.973	19	8	68	5	452	50.9	8.69	266.9	8	metabolic process;regulation of biological process	cytosol;membrane;mitochondrion	catalytic activity;metal ion binding;nucleotide binding	Pf00180	361596	ENSRNOG00000013949.7	Idh2	1	Peroxisome; Citrate cycle (TCA cycle); Metabolic pathways; Carbon metabolism; Glutathione metabolism; Biosynthesis of amino acids; 2-Oxocarboxylic acid metabolism		Citric acid cycle (TCA cycle); Transcriptional activation of mitochondrial biogenesis	14	3	1.012	1.127	0.995	1.031	2.11	1.029	1.082	0.993	1.018	0.713	1.05	1.028	0.994	1.038	0.914	1.024	1.146	1.033	1.114	0.817
TRUE	High	Master Protein	B1WBS4	Protein Vps26b OS=Rattus norvegicus GN=Vps26b PE=2 SV=1	0	FALSE	43.937	17	5	44	5	336	39.1	7.37	138.1	5	transport	cytosol;endosome	transporter activity	Pf03643	300472	ENSRNOG00000047235.1	Vps26b	8	Endocytosis			1	0	0.994	1.023	1.037	1.024	1.424	0.962	0.953	1.05	1.104	0.878	1.088	0.914	0.873	0.854	0.01	1.225	0.971	0.923	0.865	0.01
TRUE	High	Master Protein	P21913	Succinate dehydrogenase [ubiquinone] iron-sulfur subunit, mitochondrial OS=Rattus norvegicus GN=Sdhb PE=2 SV=2	0	FALSE	43.856	20	5	88	5	282	31.8	8.68	273.67	5	metabolic process;transport	membrane;mitochondrion	catalytic activity;metal ion binding	Pf13085, Pf13183, Pf13534	298596	ENSRNOG00000007967.7	Sdhb	5	Alzheimer's disease; Citrate cycle (TCA cycle); Oxidative phosphorylation; Metabolic pathways; Parkinson's disease; Non-alcoholic fatty liver disease (NAFLD); Huntington's disease; Carbon metabolism	TCA Cycle; Electron Transport Chain	Citric acid cycle (TCA cycle)	14	0	0.852	1.021	0.995	0.947	1.091	0.8	0.992	0.952	0.936	1.292	0.967	0.905	0.97	1.129	1.228	0.974	0.967	1.046	1.205	2.354
TRUE	High	Master Protein	M0RA34	Protein Kif1a OS=Rattus norvegicus GN=Kif1a PE=3 SV=1	0	FALSE	43.843	11	13	36	11	1698	191.9	6.2	125.54	13	cellular component movement		catalytic activity;motor activity;nucleotide binding;protein binding	Pf00169, Pf00225, Pf00498, Pf12423, Pf12473								0	2	0.844	0.947	0.994	1.107	1.752	1.042	0.869	1.159	1.317	1.472	1.196	1.154	1.027	1.008	0.01	0.898	0.965	0.933	0.92	0.01
TRUE	High	Master Protein	P31662	Sodium-dependent neutral amino acid transporter SLC6A17 OS=Rattus norvegicus GN=Slc6a17 PE=1 SV=1	0	FALSE	43.797	10	6	68	6	727	81	6.42	230.47	6	transport	membrane	transporter activity	Pf00209	613226	ENSRNOG00000050090.2	Slc6a17	2				0	0	0.917	0.922	0.965	1.044	1.13	0.912	0.892	0.934	1.018	0.888	0.814	0.812	0.911	0.939	0.653	0.868	0.892	0.948	1.005	0.01
TRUE	High	Master Protein	P17105	Inositol-trisphosphate 3-kinase A OS=Rattus norvegicus GN=Itpka PE=1 SV=3	0	FALSE	43.757	24	10	55	10	459	50.8	7.74	182.74	10	cell organization and biogenesis;metabolic process;regulation of biological process		catalytic activity;nucleotide binding;protein binding	Pf03770	81677	ENSRNOG00000005284.3	Itpka	3	Inositol phosphate metabolism; Phosphatidylinositol signaling system; Metabolic pathways; Calcium signaling pathway			4	0	0.881	0.836	0.941	0.881	0.53	0.888	0.857	0.952	0.876	0.361	0.964	0.986	0.946	0.857	0.78	0.866	0.996	0.927	0.865	0.01
TRUE	High	Master Protein	Q4V8B0	Oxidation resistance protein 1 OS=Rattus norvegicus GN=Oxr1 PE=2 SV=3	0	FALSE	43.693	9	6	47	6	839	92.8	5.1	181.38	6	cell death;metabolic process;regulation of biological process;response to stimulus	mitochondrion	catalytic activity	Pf01476, Pf07534, Pf09726	117520		Oxr1	7				0	0	0.937	0.952	1.103	0.876	0.697	0.911	0.935	1.118	0.851	0.01	0.981	0.961	0.951	0.966	0.01	0.87	0.961	0.915	1.003	0.01
TRUE	High	Master Protein	Q91ZN1	Coronin-1A OS=Rattus norvegicus GN=Coro1a PE=1 SV=3	0	FALSE	43.69	12	6	72	6	461	51	6.48	210.5	6	cell differentiation;cell organization and biogenesis;cellular component movement;regulation of biological process;response to stimulus;transport	cytoplasm;cytoskeleton;cytosol;endosome;membrane;nucleus	protein binding;RNA binding	Pf00400, Pf08953, Pf08954	155151	ENSRNOG00000019430.3	Coro1a	1	Phagosome; Tuberculosis			2	0	0.838	1.08	0.952	0.984	0.01	0.802	1.059	0.985	0.961	0.331	0.922	1.003	0.963	0.91	0.01	0.876	0.947	0.971	0.818	0.01
TRUE	High	Master Protein	D3Z981	Protein RGD1560871 OS=Rattus norvegicus GN=Plxna1 PE=4 SV=2	0	FALSE	43.687	4	8	38	8	1894	211	6.95	148.14	8		membrane	protein binding	Pf01403, Pf01437, Pf01833, Pf08337								0	0											0.836	0.885	0.915	1.101	1.849	0.858	0.897	0.972	1.192	3.335
TRUE	High	Master Protein	D3ZAN1	Type I inositol 3,4-bisphosphate 4-phosphatase OS=Rattus norvegicus GN=Inpp4a PE=4 SV=2	0	FALSE	43.57	12	9	30	9	928	104.4	7.56	92.73	9			protein binding	Pf00168								0	0	0.844	1.221	1.117	0.939	0.01						0.787	1.035	0.863	0.907	0.01	0.792	1.092	1.001	0.935	0.01
TRUE	High	Master Protein	D4AB17	Protein LOC100912917 OS=Rattus norvegicus GN=LOC100912917 PE=4 SV=2	0	FALSE	43.472	7	5	51	5	1273	137	5.69	279.31	5				Pf00586, Pf02769, Pf13507								0	0	1.015	1.006	0.932	0.955	0.552	0.95	1.023	0.983	1.007	0.686	1.053	0.982	0.964	0.976	0.906	1.007	0.993	0.968	0.979	0.78
TRUE	High	Master Protein	D4AB01	Histidine triad nucleotide binding protein 2 (Predicted), isoform CRA_a OS=Rattus norvegicus GN=Hint2 PE=4 SV=1	0	FALSE	43.265	28	3	26	3	163	17.4	9.42	105.83	3	metabolic process;regulation of biological process	mitochondrion	catalytic activity	Pf01230, Pf11969	313491	ENSRNOG00000015866.5	Hint2	5				0	0	0.991	1.05	1.193	1.047	0.01	0.965	1.047	0.973	0.989	1.411	0.956	1.075	0.94	1.023	0.01	1.004	1.015	0.963	1.02	1.575
TRUE	High	Master Protein	Q6MG60	N(G),N(G)-dimethylarginine dimethylaminohydrolase 2 OS=Rattus norvegicus GN=Ddah2 PE=1 SV=1	0	FALSE	43.243	35	6	15	6	285	29.7	6.01	67.38	6	metabolic process;regulation of biological process	cytoplasm;cytosol;mitochondrion	catalytic activity	Pf02274	294239	ENSRNOG00000000842.5	Ddah2	20			eNOS activation	4	0
TRUE	High	Master Protein	F1M0Z1	Protein Trio OS=Rattus norvegicus GN=Trio PE=4 SV=2	0	FALSE	43.213	3	8	24	6	3104	348.1	6.35	92.66	8	metabolic process;regulation of biological process	cytoplasm;membrane	catalytic activity;nucleotide binding;protein binding	Pf00018, Pf00047, Pf00069, Pf00169, Pf00435, Pf00621, Pf00650, Pf02711, Pf06293, Pf07653, Pf07679, Pf07714, Pf13716, Pf13895, Pf13927, Pf14604	310192		Trio	2				0	2	1.052	0.959	0.959	0.823	0.875	1.063	0.949	0.934	0.858	0.797	1.198	1.297	1.004	0.971	0.01	1.147	1.212	0.931	0.885	5.507
TRUE	High	Master Protein	O88767	Protein DJ-1 OS=Rattus norvegicus GN=Park7 PE=1 SV=1	0	FALSE	43.12	34	5	61	2	189	20	6.77	177.19	5	cell communication;cell organization and biogenesis;defense response;metabolic process;regulation of biological process;response to stimulus;transport	chromosome;cytoplasm;cytosol;endoplasmic reticulum;membrane;mitochondrion;nucleus;organelle lumen	antioxidant activity;catalytic activity;DNA binding;enzyme regulator activity;metal ion binding;protein binding;RNA binding	Pf01965, Pf13278	117287	ENSRNOG00000018289.6	Park7	5	Parkinson's disease			1	5	1.001	1.058	1.057	0.945	1.25	0.914	0.921	0.977	0.889	0.01	1.024	1.018	1	0.93	1.195	1.038	1.014	0.967	0.923	1.021
TRUE	High	Master Protein	Q641Z6	EH domain-containing protein 1 OS=Rattus norvegicus GN=Ehd1 PE=1 SV=1	0	FALSE	43.112	18	9	57	4	534	60.6	6.83	196.11	9	cell organization and biogenesis;regulation of biological process;response to stimulus;transport	endosome;membrane	metal ion binding;nucleotide binding;protein binding	Pf00350, Pf01926, Pf12763	293692	ENSRNOG00000043503.2	Ehd1	1	Endocytosis	Insulin Signaling	Factors involved in megakaryocyte development and platelet production	4	5	1.125	1.017	0.945	0.996	0.456	1.121	1.012	0.953	0.973	1.926	1.161	0.992	0.974	1.065	0.625	1.117	0.955	0.967	0.934	0.01
TRUE	High	Master Protein	M0R6S0	Aspartate aminotransferase OS=Rattus norvegicus PE=3 SV=1	0	FALSE	43.055	14	5	109	1	422	47	8.72	338.65	5	metabolic process			Pf00155								0	0
TRUE	High	Master Protein	P62959	Histidine triad nucleotide-binding protein 1 OS=Rattus norvegicus GN=Hint1 PE=1 SV=5	0	FALSE	42.969	25	2	18	2	126	13.8	6.87	66.14	2	cell death;metabolic process;regulation of biological process;response to stimulus	cytoplasm;cytosol;membrane;nucleus	catalytic activity;nucleotide binding	Pf01230, Pf11969	690660	ENSRNOG00000000622.7	Hint1	10				0	0	0.969	0.935	0.835	0.866	0.01	1.011	1.074	0.794	0.913	0.446	1.07	1.108	1.022	0.98	2.128	0.989	1.005	0.951	0.868	0.01
TRUE	High	Master Protein	O08875	Serine/threonine-protein kinase DCLK1 OS=Rattus norvegicus GN=Dclk1 PE=2 SV=1	0	FALSE	42.967	17	5	34	5	433	47.7	5.76	114.52	5	cell differentiation;cell growth;cell organization and biogenesis;cellular component movement;development;metabolic process;regulation of biological process;response to stimulus		catalytic activity;nucleotide binding	Pf00069, Pf07714, Pf14531	83825	ENSRNOG00000032922.7	Dclk1	2				0	0	0.933	1.128	0.971	0.969	0.897	0.894	1.18	0.877	0.999	0.01	0.953	1.203	1.032	1.032	0.01	0.97	0.99	0.996	0.954	0.01
TRUE	High	Master Protein	Q5XI22	Acetyl-CoA acetyltransferase, cytosolic OS=Rattus norvegicus GN=Acat2 PE=1 SV=1	0	FALSE	42.763	21	6	36	6	397	41.1	7.3	185.52	6	cell communication;metabolic process;regulation of biological process;response to stimulus	cytoplasm;cytosol;mitochondrion;nucleus	catalytic activity	Pf00108, Pf00109, Pf02803, Pf08541	308100		Acat2; Acat3	1	Metabolic pathways; Fatty acid degradation; Terpenoid backbone biosynthesis; Fat digestion and absorption; Lysine degradation; Propanoate metabolism; Synthesis and degradation of ketone bodies; Pyruvate metabolism; Fatty acid metabolism; Valine, leucine and isoleucine degradation; Tryptophan metabolism; Carbon metabolism; Butanoate metabolism; Glyoxylate and dicarboxylate metabolism			14	0	1.173	1.01	0.852	0.842	1.088	1.201	1.172	0.894	0.886	0.702	0.951	1.026	1.084	0.966	0.01	0.923	1.031	1.069	0.981	0.01
TRUE	High	Master Protein	Q6LDS4	Superoxide dismutase [Cu-Zn] OS=Rattus norvegicus GN=Sod1 PE=2 SV=1	0	FALSE	42.666	30	4	85	4	152	15.7	6.35	345.25	4	cell organization and biogenesis;cellular component movement;cellular homeostasis;metabolic process;regulation of biological process;response to stimulus;transport	cytoplasm;cytosol;extracellular;membrane;mitochondrion;nucleus;vacuole	antioxidant activity;catalytic activity;metal ion binding;protein binding	Pf00080	24786		Sod1	11		Selenium Micronutrient Network; Folic Acid Network; Oxidative Stress		3	0	1.042	1.035	1.018	1.185	1.071	0.925	0.88	0.734	0.858	1.04	1.126	1.101	1.101	1.295	1.016	1.166	1.129	1.088	1.284	0.01
TRUE	High	Master Protein	Q6AZ25	Tropomyosin 1, alpha OS=Rattus norvegicus GN=Tpm1 PE=2 SV=1	0	FALSE	42.619	20	6	53	3	248	28.7	4.78	159.07	6	cell organization and biogenesis;cellular component movement;regulation of biological process;response to stimulus	cytoplasm;cytoskeleton;cytosol	protein binding;structural molecule activity	Pf00261, Pf12718	24851		Tpm1	8	Cardiac muscle contraction; Hypertrophic cardiomyopathy (HCM); Adrenergic signaling in cardiomyocytes; MicroRNAs in cancer; Dilated cardiomyopathy	Striated Muscle Contraction		6	0	0.764	0.939	1.027	0.855	0.01	0.786	0.941	1.033	0.738	0.01	0.655	0.929	0.855	0.71	0.01	0.734	0.871	0.91	0.771	0.01
TRUE	High	Master Protein	D3ZDH8	Septin 5, isoform CRA_d OS=Rattus norvegicus GN=Sept5 PE=3 SV=1	0	FALSE	42.593	25	9	86	8	378	43.9	6.67	285.28	9	cell division;regulation of biological process	membrane	catalytic activity;nucleotide binding;protein binding	Pf00735, Pf03193	116728	ENSRNOG00000029912.6	Sept5	11	Parkinson's disease			1	1	1.004	1.014	0.979	0.952	0.573	0.969	1.028	1.035	0.944	0.3	0.847	0.98	0.984	0.937	0.01	0.919	1.025	1.034	1.019	1.315
TRUE	High	Master Protein	Q63270	Cytoplasmic aconitate hydratase OS=Rattus norvegicus GN=Aco1 PE=1 SV=1	0	FALSE	42.578	14	9	69	1	889	98.1	7.15	246.65	9	cellular homeostasis;metabolic process;regulation of biological process;response to stimulus;transport	cytoplasm;cytosol;endoplasmic reticulum;Golgi;mitochondrion	catalytic activity;metal ion binding;RNA binding	Pf00330, Pf00694	50655		Aco1	5	Glyoxylate and dicarboxylate metabolism; Biosynthesis of amino acids; 2-Oxocarboxylic acid metabolism; Carbon metabolism; Metabolic pathways; Citrate cycle (TCA cycle)			6	0
TRUE	High	Master Protein	C9WPN2	DEAD (Asp-Glu-Ala-Asp) box polypeptide 3 Y-linked OS=Rattus norvegicus GN=Ddx3 PE=2 SV=1	0	FALSE	42.529	12	6	38	1	652	73	7.11	138.53	6	metabolic process;regulation of biological process	cytosol;membrane	catalytic activity;nucleotide binding	Pf00270, Pf00271	100312982		Ddx3; Ddx3y	Y				0	0	0.946	0.981	0.927	1.189	0.01
TRUE	High	Master Protein	O08839	Myc box-dependent-interacting protein 1 OS=Rattus norvegicus GN=Bin1 PE=1 SV=1	0	FALSE	42.452	10	5	69	4	588	64.5	5.03	247.87	5	cell differentiation;cell organization and biogenesis;development;regulation of biological process;transport	cytoplasm;cytosol;membrane;nucleus	protein binding	Pf00018, Pf03114, Pf07653, Pf14604	117028		Bin1	18	Fc gamma R-mediated phagocytosis; Endocytosis			2	0	0.941	0.84	0.91	0.677	0.01	0.976	0.896	0.927	0.825	1.137	0.975	0.861	0.938	0.749	0.593	0.942	0.782	0.876	0.599	0.01
TRUE	High	Master Protein	M0R9L2	Ciliary neurotrophic factor receptor subunit alpha OS=Rattus norvegicus GN=Cntfr PE=4 SV=1	0	FALSE	42.409	19	4	25	4	372	40.8	6.83	130.95	4	regulation of biological process;response to stimulus	membrane	protein binding;receptor activity;signal transducer activity	Pf00041, Pf00047, Pf13895	313173	ENSRNOG00000047307.2	Cntfr	5		Adipogenesis; Delta-Notch Signaling Pathway	IL-6-type cytokine receptor ligand interactions	7	0	1.058	1.111	0.876	0.955	0.01	0.997	1.044	0.901	1.026	0.01	0.933	1.143	0.991	0.934	0.01	1.106	1.294	1.085	0.987	0.01
TRUE	High	Master Protein	P25113	Phosphoglycerate mutase 1 OS=Rattus norvegicus GN=Pgam1 PE=1 SV=4	0	FALSE	42.394	9	3	104	3	254	28.8	7.18	363.26	3	metabolic process;regulation of biological process	cytoplasm;cytosol;membrane;nucleus	catalytic activity;protein binding	Pf00300	24642	ENSRNOG00000050585.2	Pgam1	1	Carbon metabolism; Biosynthesis of amino acids; Glycine, serine and threonine metabolism; Glycolysis / Gluconeogenesis; Glucagon signaling pathway; Metabolic pathways; Central carbon metabolism in cancer	Glycolysis and Gluconeogenesis; Hexoses metabolism in proximal tubules	Glycolysis; Gluconeogenesis; Neutrophil degranulation	17	0	0.867	1.211	0.971	0.921	0.01	0.898	1.191	1.006	0.962	0.01	0.931	1.288	1.052	0.975	0.01	0.908	1.246	1.022	0.966	1.448
TRUE	High	Master Protein	M0R686	Protein Irgq OS=Rattus norvegicus GN=Irgq PE=4 SV=1	0	FALSE	42.313	17	8	44	8	582	59.1	4.75	132.41	8			nucleotide binding		292708	ENSRNOG00000046500.2	Irgq	1				0	0	1.138	1.088	1.018	0.995	0.948	1.187	1.106	1.039	1.082	1.178	1.074	1.017	1.034	1.068	1.683	1.104	1.043	1.039	1.032	0.01
TRUE	High	Master Protein	Q9Z1N4	3'(2'),5'-bisphosphate nucleotidase 1 OS=Rattus norvegicus GN=Bpnt1 PE=1 SV=1	0	FALSE	42.159	25	6	41	6	308	33.2	5.87	149.32	6	metabolic process		catalytic activity;metal ion binding	Pf00459	64473	ENSRNOG00000002378.7	Bpnt1	13	Sulfur metabolism; Metabolic pathways		Cytosolic sulfonation of small molecules	6	0	1.05	1.156	1	1.164	3	0.985	1.114	1.073	1.026	2.2	1.003	0.978	0.992	1.13	2.07	1.046	0.947	0.997	1.12	1.554
TRUE	High	Master Protein	M0R8T7	SH3 and multiple ankyrin repeat domains protein 2 OS=Rattus norvegicus GN=Shank2 PE=4 SV=1	0	FALSE	42.116	5	5	40	5	1516	163.2	6.64	184.41	5			protein binding	Pf00018, Pf00023, Pf00536, Pf00595, Pf07647, Pf07653, Pf12796, Pf13637, Pf13857, Pf14604								0	0	0.783	1.068	1.072	0.892	0.743	1.032	0.957	1.128	0.957	0.959	0.855	0.86	0.999	0.837	0.01	0.824	0.757	1.041	0.809	0.01
TRUE	High	Master Protein	Q0GLB5	DPPY splice variant d OS=Rattus norvegicus GN=Dpp10 PE=2 SV=1	0	FALSE	42.111	12	8	26	7	789	90	6.48	83.78	8	cell organization and biogenesis;metabolic process;regulation of biological process	membrane	catalytic activity;protein binding	Pf00326, Pf00930	363972		Dpp10	13				0	0	0.973	1.014	1.036	0.978	0.985	0.773	1.163	1.051	0.901	0.01						0.926	0.879	1.137	1.08	0.01
TRUE	High	Master Protein	Q6AYT7	Monoacylglycerol lipase ABHD12 OS=Rattus norvegicus GN=Abhd12 PE=2 SV=1	0	FALSE	42.066	23	6	38	6	398	45.3	8.72	166.11	6	metabolic process;response to stimulus	cytoplasm;membrane	catalytic activity	Pf00326, Pf00561, Pf12695, Pf12697	499913	ENSRNOG00000036934.2	Abhd12	3			Gastrin-CREB signalling pathway via PKC and MAPK; Arachidonate production from DAG	9	0	1.178	1.207	0.84	1.102	0.01	1.48	1.51	1.016	1.095	0.01	1.062	1.27	0.933	1.124	0.01	1.109	1.143	0.943	1.154	0.01
TRUE	High	Master Protein	D4A8A0	DNA fragmentation factor subunit beta OS=Rattus norvegicus GN=Cad PE=3 SV=2	0	FALSE	42.011	4	7	19	7	2224	243.2	6.54	71	7	metabolic process;response to stimulus;transport	cytosol;membrane;nucleus	catalytic activity;metal ion binding;nucleotide binding;protein binding	Pf00117, Pf00185, Pf00289, Pf00988, Pf01071, Pf01979, Pf02142, Pf02222, Pf02729, Pf02786, Pf02787, Pf07478, Pf07722, Pf08443, Pf13147, Pf13535, Pf13594, Pf15632		ENSRNOG00000026474.6		6			Pyrimidine biosynthesis	4	0						1.12	1.096	0.791	0.951	0.464	1.459	1.223	0.906	0.845	1.742
TRUE	High	Master Protein	P54921	Alpha-soluble NSF attachment protein OS=Rattus norvegicus GN=Napa PE=1 SV=2	0	FALSE	41.998	18	5	72	4	295	33.2	5.45	191.12	5	cell communication;cell differentiation;cell organization and biogenesis;regulation of biological process;transport	membrane	protein binding	Pf14938	140673	ENSRNOG00000001494.6	Napa	1	Synaptic vesicle cycle		Golgi Associated Vesicle Biogenesis; Intra-Golgi traffic; Retrograde transport at the Trans-Golgi-Network; COPI-dependent Golgi-to-ER retrograde traffic; COPII (Coat Protein 2) Mediated Vesicle Transport; COPI-mediated anterograde transport	18	0	0.982	0.993	0.969	0.872	1.885	0.88	1.051	1.002	0.84	0.882	0.824	1.207	0.993	0.83	2.063	0.835	1.032	0.922	0.758	0.01
TRUE	High	Master Protein	G3V9V3	Cytoplasmic dynein 1 intermediate chain 2 OS=Rattus norvegicus GN=Dync1i2 PE=4 SV=2	0	FALSE	41.912	15	6	8	6	638	71.2	5.24	37.16	6	cellular component movement		protein binding	Pf00400, Pf11540								0	0						0.675	1.196	1.16	0.76	0.01
TRUE	High	Master Protein	D3ZDC0	Neuroligin-3 OS=Rattus norvegicus GN=Nlgn3 PE=4 SV=1	0	FALSE	41.86	8	4	29	3	828	91.5	5.8	114.9	4	cell differentiation;cell growth;cell organization and biogenesis;metabolic process;regulation of biological process;response to stimulus;transport	cell surface;membrane	catalytic activity;protein binding;receptor activity	Pf00135, Pf07859	171297	ENSRNOG00000003812.7	Nlgn3	X			Neurexins and neuroligins	3	1						1.065	1.038	1.018	1.121	1.827	0.981	1.01	1.059	1.155	2.068	0.946	0.93	1.058	1.172	1.318
TRUE	High	Master Protein	P62828	GTP-binding nuclear protein Ran OS=Rattus norvegicus GN=Ran PE=1 SV=3	0	FALSE	41.856	23	4	22	3	216	24.4	7.49	99.51	4	cell division;cell organization and biogenesis;regulation of biological process;response to stimulus;transport	chromosome;cytoplasm;endosome;membrane;nucleus	catalytic activity;metal ion binding;nucleotide binding;protein binding;RNA binding;transporter activity	Pf00025, Pf00071, Pf08477	84509	ENSRNOG00000000938.7	Ran	12	Ribosome biogenesis in eukaryotes; RNA transport; HTLV-I infection; Epstein-Barr virus infection		Regulation of cholesterol biosynthesis by SREBP (SREBF); Transcriptional regulation by small RNAs	11	1	1.075	0.932	0.733	0.771	0.578	1.059	0.896	0.675	0.763	0.867	1.046	1.009	0.992	1.033	1.36	1.02	0.936	0.968	0.979	0.01
TRUE	High	Master Protein	B0BN83	Armadillo repeat-containing protein 1 OS=Rattus norvegicus GN=Armc1 PE=2 SV=1	0	FALSE	41.735	19	2	24	2	282	31.2	5.57	158.25	2	transport	cytoplasm;mitochondrion;nucleus	metal ion binding;protein binding	Pf00514	294948	ENSRNOG00000013253.6	Armc1	2				0	0	1.015	1.071	0.886	1.125	2.81	1.051	1.05	0.875	1.151	1.314	0.946	1.008	0.927	1.113	0.01	0.995	1.003	1.026	1.117	1.849
TRUE	High	Master Protein	M0R7Q5	40S ribosomal protein S8 OS=Rattus norvegicus GN=LOC100363452 PE=3 SV=1	0	FALSE	41.596	29	5	58	5	208	24.2	10.32	216.51	5	metabolic process	cytosol;endoplasmic reticulum;membrane;nucleus;ribosome	RNA binding;structural molecule activity	Pf01201	100363452	ENSRNOG00000021395.5	LOC100363452	3			SRP-dependent cotranslational protein targeting to membrane; Formation of a pool of free 40S subunits; Translation initiation complex formation; Major pathway of rRNA processing in the nucleolus and cytosol; GTP hydrolysis and joining of the 60S ribosomal subunit; Formation of the ternary complex, and subsequently, the 43S complex; Ribosomal scanning and start codon recognition; Nonsense Mediated…	19	0						0.976	1.058	0.994	1.119	2.105	0.996	1.065	1.039	1.041	2.397	1.011	1.111	1.026	1.049	0.01
TRUE	High	Master Protein	P60892	Ribose-phosphate pyrophosphokinase 1 OS=Rattus norvegicus GN=Prps1 PE=1 SV=2	0	FALSE	41.554	21	7	73	7	318	34.8	6.98	268.55	7	metabolic process		catalytic activity;metal ion binding;nucleotide binding;protein binding	Pf00156, Pf13793, Pf14572	29562; 314140	ENSRNOG00000060262.1	Prps1; LOC314140	X; 6	Biosynthesis of amino acids; Carbon metabolism; Pentose phosphate pathway; Metabolic pathways; Purine metabolism	Nucleotide Metabolism	5-Phosphoribose 1-diphosphate biosynthesis	10	0	0.965	0.938	0.894	0.845	1.243	0.979	0.98	0.906	0.873	0.507	0.96	1.009	0.969	1.036	1.725	1.023	1.103	1.006	0.99	1.676
TRUE	High	Master Protein	D4A830	Protein Ppa2 OS=Rattus norvegicus GN=Ppa2 PE=4 SV=1	0	FALSE	41.516	17	4	45	4	330	37.8	7.17	174.14	4	metabolic process	cytoplasm;mitochondrion	catalytic activity;metal ion binding	Pf00719	310856		Ppa2	2	Oxidative phosphorylation			1	0	1.045	0.95	1.007	0.96	1.156	1.128	1.002	1.015	1.003	1.265	1.059	0.887	1.051	1.025	0.01	1.086	0.935	1.095	1.097	0.01
TRUE	High	Master Protein	R9PXX9	Sodium/calcium exchanger 1 OS=Rattus norvegicus GN=Slc8a1 PE=4 SV=1	0	FALSE	41.486	4	4	51	3	935	104.1	4.92	217.6	4	cell communication;transport			Pf01699, Pf03160								0	1	1.113	0.955	1.02	0.939	0.429	1.075	0.945	1.034	0.931	1.066	1.133	1.008	0.979	1.071	0.01	1.133	0.995	1.069	1.129	0.652
TRUE	High	Master Protein	P50475	Alanine--tRNA ligase, cytoplasmic OS=Rattus norvegicus GN=Aars PE=1 SV=3	0	FALSE	41.385	15	10	21	10	968	106.7	5.62	86.32	10	metabolic process;regulation of biological process	cytoplasm;cytosol;membrane;mitochondrion	catalytic activity;metal ion binding;nucleotide binding;RNA binding	Pf01411, Pf02272, Pf07973	292023	ENSRNOG00000018404.7	Aars	19	Aminoacyl-tRNA biosynthesis			1	0	1.038	0.972	1.021	1.075	1.602	0.899	1.102	0.971	0.905	0.01	0.936	0.926	0.964	0.945	0.01	0.783	1.059	0.935	0.779	0.01
TRUE	High	Master Protein	B0BN30	Mtch1 protein OS=Rattus norvegicus GN=Mtch1 PE=2 SV=1	0	FALSE	41.349	18	6	49	6	389	41.6	9.32	147.47	6	metabolic process;regulation of biological process;transport	membrane;mitochondrion		Pf00153	294313	ENSRNOG00000000527.6	Mtch1	20				0	0	1.078	1.061	1.034	1.033	0.01	1.085	1.02	1.024	1.105	0.708	1.076	1.006	1.045	1.109	1.219	1.083	1.056	1.063	1.034	2.136
TRUE	High	Master Protein	Q5U2S7	Proteasome (Prosome, macropain) 26S subunit, non-ATPase, 3 OS=Rattus norvegicus GN=Psmd3 PE=2 SV=1	0	FALSE	41.295	13	6	60	6	530	60.7	8.44	200.56	6	metabolic process;regulation of biological process	membrane;nucleus;proteasome	enzyme regulator activity;protein binding	Pf01399, Pf08375	287670	ENSRNOG00000028103.5	Psmd3	10	Epstein-Barr virus infection; Proteasome	Proteasome Degradation; TNF-alpha NF-kB Signaling Pathway	Interleukin-1 family signaling; Neutrophil degranulation; Regulation of RUNX2 expression and activity; The role of GTSE1 in G2/M progression after G2 checkpoint; Ubiquitin Mediated Degradation of Phosphorylated Cdc25A; Asymmetric localization of PCP proteins; APC/C:Cdh1 mediated degradation of Cdc20 and other APC/C:Cdh1 targeted proteins in late mitosis/early G1; Regulation of PTEN stability and …	130	0	0.817	1.125	1.054	0.936	1.067	1.053	1.06	1.018	0.889	0.79	1.134	0.981	1.124	0.83	0.01	1.029	0.988	0.982	0.793	1.394
TRUE	High	Master Protein	F1LPS8	Transcriptional activator protein Pur-alpha OS=Rattus norvegicus GN=Pura PE=4 SV=2	0	FALSE	41.294	12	3	56	2	303	33.7	6.44	330.74	3				Pf04845								0	0	0.892	0.895	0.949	1.046	0.72	0.919	0.95	1.008	1.105	1.144	0.874	0.94	0.963	1.155	0.79	0.841	0.914	0.977	1.112	0.01
TRUE	High	Master Protein	P04906	Glutathione S-transferase P OS=Rattus norvegicus GN=Gstp1 PE=1 SV=2	0	FALSE	41.183	15	2	39	2	210	23.4	7.36	185.37	2	cell communication;cell proliferation;metabolic process;regulation of biological process;response to stimulus	cytoplasm;cytosol;membrane;mitochondrion;nucleus	antioxidant activity;catalytic activity;enzyme regulator activity;protein binding	Pf00043, Pf02798, Pf14497	24426	ENSRNOG00000018237.4	Gstp1	1	Drug metabolism - cytochrome P450; Chemical carcinogenesis; Glutathione metabolism; Prostate cancer; Metabolism of xenobiotics by cytochrome P450; Platinum drug resistance	Metapathway biotransformation	Detoxification of Reactive Oxygen Species; Glutathione conjugation; Neutrophil degranulation	17	0	1.041	0.873	0.949	1.023	1.99	1.052	0.956	1.003	1.007	1.008	1.019	0.803	0.911	0.952	1.432	1.054	0.853	0.974	1.014	0.01
TRUE	High	Master Protein	P41123	60S ribosomal protein L13 OS=Rattus norvegicus GN=Rpl13 PE=1 SV=2	0	FALSE	41.174	24	5	64	5	211	24.3	11.55	201.08	5	metabolic process	membrane;nucleus;ribosome	RNA binding;structural molecule activity	Pf01294	81765; 100359922	ENSRNOG00000015335.6	Rpl13; LOC100359922	19; 8	Ribosome	Cytoplasmic Ribosomal Proteins	SRP-dependent cotranslational protein targeting to membrane; Formation of a pool of free 40S subunits; Major pathway of rRNA processing in the nucleolus and cytosol; GTP hydrolysis and joining of the 60S ribosomal subunit; Nonsense Mediated Decay (NMD) enhanced by the Exon Junction Complex (EJC); Nonsense Mediated Decay (NMD) independent of the Exon Junction Complex (EJC); L13a-mediated translati…	17	0	1.018	1.073	0.982	1.039	1.279	1.039	1.138	1.06	1.125	2.66	1.017	1.083	1.006	0.997	1.553	1.015	1.08	0.982	0.955	1.031
TRUE	High	Master Protein	P35465	Serine/threonine-protein kinase PAK 1 OS=Rattus norvegicus GN=Pak1 PE=1 SV=3	0	FALSE	41.044	12	5	35	3	544	60.5	5.86	122.76	5	cell death;cell organization and biogenesis;metabolic process;regulation of biological process;response to stimulus;transport	cytoplasm;cytosol;Golgi;membrane;nucleus	catalytic activity;nucleotide binding;protein binding;signal transducer activity	Pf00069, Pf00786, Pf07714, Pf14531	29431	ENSRNOG00000029784.4	Pak1	1	Focal adhesion; Regulation of actin cytoskeleton; Fc gamma R-mediated phagocytosis; ErbB signaling pathway; Proteoglycans in cancer; Renal cell carcinoma; Hippo signaling pathway -multiple species; Chemokine signaling pathway; cAMP signaling pathway; Ras signaling pathway; Axon guidance; Natural killer cell mediated cytotoxicity; MAPK signaling pathway; T cell receptor signaling pathway	Focal Adhesion; IL-3 Signaling Pathway; Regulation of Actin Cytoskeleton; MAPK signaling pathway; Alpha6-Beta4 Integrin Signaling Pathway; EGFR1 Signaling Pathway; Integrin-mediated cell adhesion; FAS pathway and Stress induction of HSP regulation; Signaling of Hepatocyte Growth Factor Receptor	VEGFR2 mediated vascular permeability; MAPK6/MAPK4 signaling; Regulation of actin dynamics for phagocytic cup formation; Generation of second messenger molecules; CD209 (DC-SIGN) signaling; RHO GTPases activate PAKs; DSCAM interactions; Sema3A PAK dependent Axon repulsion; CD28 dependent Vav1 pathway; FCERI mediated MAPK activation; Signal transduction by L1; EPHB-mediated forward signaling; Ephr…	58	2											1.006	1.142	1.084	1.192	1.557	1.09	1.216	1.228	1.252	0.01
TRUE	High	Master Protein	Q3MHS9	Chaperonin containing Tcp1, subunit 6A (Zeta 1) OS=Rattus norvegicus GN=Cct6a PE=2 SV=1	0	FALSE	40.989	13	8	68	8	531	58	7.08	251.34	8	metabolic process;regulation of biological process;transport	cytoplasm;cytosol	nucleotide binding;protein binding;RNA binding	Pf00118	288620	ENSRNOG00000000923.8	Cct6a	12			Association of TriC/CCT with target proteins during biosynthesis; Cooperation of PDCL (PhLP1) and TRiC/CCT in G-protein beta folding	5	0	0.864	1.119	1.027	0.881	0.632	0.888	1.162	0.991	0.894	0.56	0.886	0.9	0.942	0.896	0.01	0.925	0.946	0.958	0.88	1.114
TRUE	High	Master Protein	D3ZRN3	Protein Actbl2 OS=Rattus norvegicus GN=Actbl2 PE=3 SV=1	0	FALSE	40.942	22	8	182	2	376	41.9	5.49	666.39	8			nucleotide binding	Pf00022	294732	ENSRNOG00000043292.1	Actbl2	2				0	0
TRUE	High	Master Protein	Q6MG49	Large proline-rich protein BAG6 OS=Rattus norvegicus GN=Bag6 PE=2 SV=2	0	FALSE	40.885	5	4	24	4	1146	119.9	5.66	115.1	4	cell death;cell differentiation;cell organization and biogenesis;metabolic process;regulation of biological process;response to stimulus;transport	cytoplasm;cytosol;extracellular;membrane;nucleus	protein binding	Pf00240, Pf11976, Pf12057	94342	ENSRNOG00000000851.8	Bag6	20				0	0	0.998	0.886	1.021	0.998	1.798	0.995	0.911	1	0.945	0.01	1.018	0.95	1.041	1.149	0.01	1.019	0.95	1.057	1.078	0.01
TRUE	High	Master Protein	F1M403	Protein Ube2o (Fragment) OS=Rattus norvegicus GN=Ube2o PE=4 SV=1	0	FALSE	40.885	10	10	53	10	1287	140.5	5.08	162.52	10				Pf00179								0	0	1.126	1.018	0.942	0.97	0.01	1.121	1.082	0.952	0.993	1.587	1.023	1.122	1.065	1.092	1.467	1.038	1.126	1.035	1.001	0.01
TRUE	High	Master Protein	B2GV33	Maoa protein (Fragment) OS=Rattus norvegicus GN=Maoa PE=2 SV=1	0	FALSE	40.789	13	6	62	6	520	58.8	8.07	230.22	6	metabolic process	membrane;mitochondrion	catalytic activity;nucleotide binding	Pf00070, Pf00890, Pf01266, Pf01494, Pf01593, Pf01946, Pf03486, Pf07992, Pf12831, Pf13450	29253		Maoa	X		Oxidative Stress; Biogenic Amine Synthesis		2	0	1.157	0.936	1.051	0.991	0.01	1.181	0.946	1.115	1.02	0.826	1.034	1.057	1.116	1.121	1.066	1.025	1.011	1.047	1.012	0.382
TRUE	High	Master Protein	D3ZT20	Protein Fbxo41 OS=Rattus norvegicus GN=Fbxo41 PE=4 SV=2	0	FALSE	40.773	11	7	35	7	870	93.8	8.03	123.23	7			protein binding	Pf00646, Pf12937								0	0											1.026	1.028	0.967	1.031	0.01	0.987	0.917	0.948	0.967	0.667
TRUE	High	Master Protein	P97852	Peroxisomal multifunctional enzyme type 2 OS=Rattus norvegicus GN=Hsd17b4 PE=1 SV=3	0	FALSE	40.762	13	9	40	9	735	79.4	8.57	134.09	9	cell differentiation;metabolic process;response to stimulus	membrane;mitochondrion	catalytic activity;protein binding	Pf00106, Pf01575, Pf02036, Pf08659, Pf13452, Pf13561, Pf14864	79244	ENSRNOG00000015840.7	Hsd17b4	18	Primary bile acid biosynthesis; Peroxisome; Metabolic pathways	Steroid Biosynthesis	Beta-oxidation of very long chain fatty acids; alpha-linolenic acid (ALA) metabolism; Beta-oxidation of pristanoyl-CoA; Synthesis of bile acids and bile salts via 7alpha-hydroxycholesterol	16	0	1.007	1.011	0.961	0.966	2.096	0.988	0.987	0.948	1.005	1.415	0.964	0.966	0.962	1.023	1.739	1.055	1.082	1.001	1.061	1.36
TRUE	High	Master Protein	M0R4G7	Protein Iqsec1 OS=Rattus norvegicus GN=Iqsec1 PE=4 SV=1	0	FALSE	40.712	9	8	38	5	962	107.9	7.68	148.9	8	regulation of biological process			Pf01369								0	3	0.873	0.93	0.994	0.847	0.01	1.001	1.069	1.004	0.927	0.01
TRUE	High	Master Protein	F1LM33	Leucine-rich PPR motif-containing protein, mitochondrial OS=Rattus norvegicus GN=Lrpprc PE=4 SV=2	0	FALSE	40.678	7	8	44	8	1392	156.6	6.61	171.95	8	metabolic process;regulation of biological process;transport	chromosome;cytoplasm;cytoskeleton;membrane;mitochondrion;nucleus	catalytic activity;DNA binding;protein binding;RNA binding	Pf01535, Pf12854, Pf13041, Pf13812	313867	ENSRNOG00000005877.6	Lrpprc	6		TNF-alpha NF-kB Signaling Pathway		1	0	1.087	1.032	0.943	0.898	0.01	1.121	0.959	0.995	0.915	1.182	0.986	0.957	0.941	1.042	1.388	1.043	1.041	0.972	1.09	1.653
TRUE	High	Master Protein	Q9JHL4	Drebrin-like protein OS=Rattus norvegicus GN=Dbnl PE=1 SV=1	0	FALSE	40.61	13	6	51	6	436	48.6	4.92	146.27	6	cell organization and biogenesis;regulation of biological process;response to stimulus;transport	cytoplasm;cytoskeleton;cytosol;endosome;Golgi;membrane	protein binding	Pf00018, Pf00241, Pf07653, Pf14604	83527	ENSRNOG00000012378.7	Dbnl	14			Neurexins and neuroligins; Caspase-mediated cleavage of cytoskeletal proteins; Neutrophil degranulation	11	0	0.841	1.043	1.088	1.011	0.795	0.843	1.154	1.071	0.949	1.276	0.709	1.03	0.943	0.962	0.01	0.841	1.205	1.009	0.915	0.01
TRUE	High	Master Protein	Q64428	Trifunctional enzyme subunit alpha, mitochondrial OS=Rattus norvegicus GN=Hadha PE=1 SV=2	0	FALSE	40.496	7	5	36	5	763	82.6	9.06	123.04	5	metabolic process;response to stimulus	membrane;mitochondrion;organelle lumen	catalytic activity;nucleotide binding;protein binding	Pf00378, Pf00725, Pf02737	170670	ENSRNOG00000024629.6	Hadha	6	Lysine degradation; Valine, leucine and isoleucine degradation; Butanoate metabolism; beta-Alanine metabolism; Tryptophan metabolism; Fatty acid metabolism; Biosynthesis of unsaturated fatty acids; Metabolic pathways; Fatty acid elongation; Carbon metabolism; Fatty acid degradation; Propanoate metabolism	Fatty Acid Beta Oxidation; Beta Oxidation Meta Pathway; Beta Oxidation of Unsaturated Fatty Acids; Mitochondrial LC-Fatty Acid Beta-Oxidation	Beta oxidation of myristoyl-CoA to lauroyl-CoA; Beta oxidation of lauroyl-CoA to decanoyl-CoA-CoA; Beta oxidation of octanoyl-CoA to hexanoyl-CoA; Beta oxidation of decanoyl-CoA to octanoyl-CoA-CoA; Beta oxidation of hexanoyl-CoA to butanoyl-CoA; Beta oxidation of palmitoyl-CoA to myristoyl-CoA; Acyl chain remodeling of CL	30	0	1.041	1.033	0.969	1.136	1.008	1.054	1.024	0.964	1.161	0.634
TRUE	High	Master Protein	Q63372	Neurexin-1 OS=Rattus norvegicus GN=Nrxn1 PE=1 SV=3	0	FALSE	40.482	7	8	45	7	1530	167.8	5.96	128.02	8	cell communication;cell differentiation;cell organization and biogenesis;regulation of biological process;response to stimulus;transport	cell surface;endoplasmic reticulum;membrane	metal ion binding;protein binding;receptor activity;signal transducer activity	Pf00008, Pf00054, Pf02210, Pf13385	60391		Nrxn1	6	Cell adhesion molecules (CAMs)			1	1	1.023	1.095	1.031	1.046	0.861	0.951	0.988	1.082	0.96	1.1	0.943	1.025	0.979	1.117	0.01	0.86	0.966	0.916	1.38	2.586
TRUE	High	Master Protein	F1LY09	Protein Actr3b (Fragment) OS=Rattus norvegicus GN=Actr3b PE=3 SV=2	0	FALSE	40.448	13	4	101	2	315	35.8	6.44	277.33	4	cell organization and biogenesis;regulation of biological process		nucleotide binding	Pf00022		ENSRNOG00000031855.4		4				0	0
TRUE	High	Master Protein	Q6JE36	Protein NDRG1 OS=Rattus norvegicus GN=Ndrg1 PE=1 SV=1	0	FALSE	40.265	8	2	32	2	394	42.9	6.19	130.19	2	cell organization and biogenesis;regulation of biological process;response to stimulus	cytoplasm;cytoskeleton;cytosol;membrane;nucleus	protein binding	Pf00561, Pf03096, Pf12697	299923	ENSRNOG00000007393.7	Ndrg1	7				0	0											0.923	0.999	0.948	1.004	1.783	0.913	0.948	0.994	0.958	0.01
TRUE	High	Master Protein	B1WBW4	Armadillo repeat-containing protein 10 OS=Rattus norvegicus GN=Armc10 PE=2 SV=1	0	FALSE	40.247	10	2	29	2	306	33.4	7.97	152.99	2	regulation of biological process	endoplasmic reticulum;membrane;mitochondrion	protein binding	Pf04826	296758	ENSRNOG00000012785.5	Armc10	4				0	0											0.895	1.069	0.887	1.051	2.343	0.862	1.054	0.882	1.041	0.94
TRUE	High	Master Protein	E9PTW1	Protein Scamp3 OS=Rattus norvegicus GN=Scamp3 PE=4 SV=2	0	FALSE	40.166	13	3	23	3	350	38.5	6.76	97.81	3	metabolic process;response to stimulus;transport	membrane	catalytic activity;nucleotide binding;protein binding	Pf04144	65169	ENSRNOG00000020500.6	Scamp3	2				0	0											1.16	1.572	0.929	1.162	3.956	1.136	1.535	0.931	1.237	0.01
TRUE	High	Master Protein	Q03555	Gephyrin OS=Rattus norvegicus GN=Gphn PE=1 SV=3	0	FALSE	40.113	15	8	34	8	768	83.2	5.73	121.75	8	cell organization and biogenesis;metabolic process;response to stimulus;transport	cytoplasm;cytoskeleton;membrane	catalytic activity;metal ion binding;nucleotide binding;protein binding;structural molecule activity	Pf00994, Pf03453, Pf03454	64845		Gphn	6	Folate biosynthesis; Metabolic pathways; GABAergic synapse			3	0	0.948	0.791	0.942	1.016	0.976						1.009	1.031	1.026	1.102	1.394
TRUE	High	Master Protein	Q5XIJ3	Isocitrate dehydrogenase 3 (NAD), gamma OS=Rattus norvegicus GN=Idh3g PE=2 SV=1	0	FALSE	40.004	19	7	83	7	393	42.8	9.01	262.39	7	metabolic process;regulation of biological process	mitochondrion	catalytic activity;metal ion binding;nucleotide binding	Pf00180	25179	ENSRNOG00000055572.1	Idh3g	X	Metabolic pathways; Citrate cycle (TCA cycle); Carbon metabolism; Biosynthesis of amino acids; 2-Oxocarboxylic acid metabolism	TCA Cycle	Citric acid cycle (TCA cycle)	10	0	1.005	1.116	1.062	0.932	0.01	0.941	1.067	1.022	0.981	0.01	0.978	0.966	0.991	0.939	0.556	0.973	0.948	1.009	0.924	0.01
TRUE	High	Master Protein	Q5FVC2	Rho guanine nucleotide exchange factor 2 OS=Rattus norvegicus GN=Arhgef2 PE=2 SV=1	0	FALSE	39.895	10	8	37	8	985	111.8	7.12	149.03	8	cell division;cell organization and biogenesis;defense response;regulation of biological process;response to stimulus	cytoplasm;cytoskeleton;Golgi	metal ion binding;protein binding	Pf00130, Pf00169, Pf00621, Pf07649	310635	ENSRNOG00000020027.8	Arhgef2	2			Rho GTPase cycle; Signalling by NGF; G alpha (12/13) signalling events; NRAGE signals death through JNK	11	0	0.938	1.008	1.059	1.075	0.01	0.951	0.902	1.051	0.921	0.01	0.946	0.967	1.006	0.968	0.01	0.964	1.03	0.989	1.068	0.01
TRUE	High	Master Protein	P18421	Proteasome subunit beta type-1 OS=Rattus norvegicus GN=Psmb1 PE=1 SV=3	0	FALSE	39.878	22	5	41	5	240	26.5	7.36	129.52	5	metabolic process	cytoplasm;nucleus;proteasome	catalytic activity	Pf00227	94198		Psmb1	1	Proteasome	Proteasome Degradation		2	0	0.858	1.071	1.048	0.891	0.916	0.934	1.127	1.089	0.911	1.586	0.987	1.079	1.007	1.055	1.919	1.058	1.095	1.03	1.039	1.547
TRUE	High	Master Protein	M0R757	Elongation factor 1-alpha OS=Rattus norvegicus GN=LOC100360413 PE=3 SV=1	0	FALSE	39.85	11	5	84	1	462	50.1	9.01	307.68	5	metabolic process	cytoplasm	catalytic activity;nucleotide binding;RNA binding	Pf00009, Pf03143, Pf03144	100360413; 100911991	ENSRNOG00000056855.1; ENSRNOG00000051885.1	LOC100360413; LOC100911991	X				0	0	1.044	1.147	1.083	1.391	0.01	0.993	1.152	1.099	1.32	1.1	1.027	1.114	1.149	1.383	0.01	0.964	1.049	1.079	1.346	2.001
TRUE	High	Master Protein	Q62868	Rho-associated protein kinase 2 OS=Rattus norvegicus GN=Rock2 PE=1 SV=2	0	FALSE	39.832	6	8	36	8	1388	160.3	5.92	124.08	8	cell organization and biogenesis;metabolic process;regulation of biological process;response to stimulus	cytoplasm;cytoskeleton;cytosol;membrane;nucleus	catalytic activity;metal ion binding;motor activity;nucleotide binding;protein binding;RNA binding;structural molecule activity	Pf00038, Pf00069, Pf00130, Pf01576, Pf01636, Pf02185, Pf04111, Pf05557, Pf05622, Pf06160, Pf07714, Pf07888, Pf08912, Pf09726, Pf09731, Pf11559, Pf12128, Pf12718, Pf12795, Pf13094, Pf14531	25537		Rock2	6	Vascular smooth muscle contraction; Sphingolipid signaling pathway; Pathways in cancer; Salmonella infection; Axon guidance; Platelet activation; Chemokine signaling pathway; Focal adhesion; Leukocyte transendothelial migration; cGMP-PKG signaling pathway; cAMP signaling pathway; Proteoglycans in cancer; Oxytocin signaling pathway; Wnt signaling pathway; Regulation of actin cytoskeleton	Focal Adhesion; Regulation of Actin Cytoskeleton; G13 Signaling Pathway; Integrin-mediated cell adhesion		19	0	1.057	1.03	0.955	1.015	0.01	1.033	0.948	0.931	0.854	0.01	0.996	1.12	1.168	0.997	1.261	1.056	1.085	1.102	0.993	1.226
TRUE	High	Master Protein	D3ZQG6	Tripartite motif-containing protein 2 OS=Rattus norvegicus GN=Trim2 PE=1 SV=2	0	FALSE	39.824	12	6	31	5	744	81.4	7.05	147	6	metabolic process;regulation of biological process	cytoplasm	catalytic activity;metal ion binding;protein binding	Pf00097, Pf00630, Pf00643, Pf01436, Pf08450, Pf10174, Pf13445, Pf13639, Pf13920, Pf13923, Pf14634, Pf15227	361970		Trim2	2				0	1	0.866	0.96	0.955	0.949	1.132	0.907	0.95	0.929	0.955	0.01	0.968	1.097	0.986	1.086	0.01	0.941	1.063	1.013	1.064	0.01
TRUE	High	Master Protein	P47728	Calretinin OS=Rattus norvegicus GN=Calb2 PE=1 SV=1	0	FALSE	39.78	16	4	58	4	271	31.4	5.02	192.77	4	cellular homeostasis	cytoplasm;cytosol;nucleus	metal ion binding	Pf00036, Pf13405, Pf13499	117059	ENSRNOG00000016977.4	Calb2	19				0	0	0.961	1.119	1.094	1.078	2.31	0.944	1.126	1.065	1.038	0.711	1.013	1.145	1.089	1.32	0.01	1.001	1.118	1.076	1.253	1.706
TRUE	High	Master Protein	Q64538	Serine/threonine-protein phosphatase (Fragment) OS=Rattus norvegicus PE=2 SV=1	0	FALSE	39.669	15	6	29	6	479	54.7	6.67	97.92	6	cell organization and biogenesis;metabolic process;regulation of biological process;response to stimulus	cytoplasm;cytosol;membrane;nucleus	catalytic activity;metal ion binding;nucleotide binding;protein binding;RNA binding;signal transducer activity	Pf00149, Pf00515, Pf07719, Pf08321, Pf12895, Pf13371, Pf13414, Pf13424, Pf13432, Pf14559	65179		Ppp5c	1		MAPK signaling pathway		1	0	0.725	1.214	1.093	0.783	0.01	0.925	1.149	1.029	0.947	0.01	0.842	1.008	1	0.941	0.01	0.803	1.26	0.99	1.332	0.01
TRUE	High	Master Protein	P85969	Beta-soluble NSF attachment protein OS=Rattus norvegicus GN=Napb PE=1 SV=1	0	FALSE	39.619	19	6	82	5	297	33.4	5.47	200.48	6	cell communication;cell organization and biogenesis;regulation of biological process;transport	membrane	protein binding	Pf14938	499903		Napb	3				0	2	0.855	1.022	1.004	0.872	0.438	0.838	1.138	1.018	0.857	0.01	0.881	0.997	1.016	0.972	1.025	0.929	0.928	0.938	0.976	0.582
TRUE	High	Master Protein	G3V8D6	Tripartite motif protein 3, isoform CRA_a OS=Rattus norvegicus GN=Trim3 PE=4 SV=1	0	FALSE	39.616	8	4	13	3	744	80.7	7.81	69.02	4	metabolic process;transport	cytoplasm;endosome;Golgi	catalytic activity;metal ion binding;protein binding	Pf00097, Pf00435, Pf00630, Pf00643, Pf01436, Pf04156, Pf08450, Pf11740, Pf12861, Pf13445, Pf13639, Pf13920, Pf13923, Pf14634, Pf15227	83616	ENSRNOG00000018356.6	Trim3	1				0	0	0.988	0.983	0.988	1.007	1.506
TRUE	High	Master Protein	P24329	Thiosulfate sulfurtransferase OS=Rattus norvegicus GN=Tst PE=1 SV=3	0	FALSE	39.613	26	8	63	7	297	33.4	7.85	218.25	8	cell differentiation;cell organization and biogenesis;metabolic process;transport	membrane;mitochondrion;organelle lumen	catalytic activity;RNA binding	Pf00581	25274	ENSRNOG00000000186.7	Tst	7	Cysteine and methionine metabolism; Sulfur relay system; Metabolic pathways; Sulfur metabolism			4	1	1.146	1.026	0.928	0.899	0.01	1.174	1.03	0.877	0.879	1.039	1.001	0.977	1.089	1.084	2.738	1.073	1.066	1.156	1.149	2.638
TRUE	High	Master Protein	P24155	Thimet oligopeptidase OS=Rattus norvegicus GN=Thop1 PE=1 SV=4	0	FALSE	39.605	8	5	43	5	687	78.3	5.94	159.94	5	metabolic process;regulation of biological process;response to stimulus	cytoplasm	catalytic activity;metal ion binding	Pf01432	64517	ENSRNOG00000019924.6	Thop1	7	Renin-angiotensin system; African trypanosomiasis		Antigen processing: Ubiquitination & Proteasome degradation	6	0											0.93	1.174	1.029	0.997	1.033	0.958	1.174	0.991	0.969	0.852
TRUE	High	Master Protein	B5DF65	Biliverdin reductase B (Flavin reductase (NADPH)) OS=Rattus norvegicus GN=LOC681468 PE=2 SV=1	0	FALSE	39.532	26	4	40	4	206	22.1	6.8	186.2	4	metabolic process	cytosol;membrane	catalytic activity	Pf01073, Pf01370, Pf13460	292737	ENSRNOG00000024410.4	Blvrb	1	Riboflavin metabolism; Porphyrin and chlorophyll metabolism		Heme degradation	5	0	1.018	1.022	0.98	1.013	0.925	1.003	1.014	1.038	1.082	1.414	0.989	0.996	1.08	1.115	2.316	0.977	0.977	1.006	1.06	0.639
TRUE	High	Master Protein	Q01066	Calcium/calmodulin-dependent 3',5'-cyclic nucleotide phosphodiesterase 1B OS=Rattus norvegicus GN=Pde1b PE=2 SV=1	0	FALSE	39.33	9	4	48	3	535	61.2	5.72	194.29	4	cell differentiation;metabolic process;regulation of biological process;response to stimulus	cytoplasm;cytosol;nucleus	catalytic activity;metal ion binding;protein binding	Pf00233, Pf08499	29691	ENSRNOG00000036828.3	Pde1b	7	Taste transduction; Calcium signaling pathway; Olfactory transduction; Purine metabolism; Renin secretion; Morphine addiction	G Protein Signaling Pathways	Cam-PDE 1 activation; G alpha (s) signalling events; cGMP effects	24	0	1.471	1.028	1.225	1.526	1.534	1.438	1.043	1.177	1.524	1.428	1.542	1.166	1.254	1.48	0.01	1.284	1.043	1.15	1.258	1.401
TRUE	High	Master Protein	P41562	Isocitrate dehydrogenase [NADP] cytoplasmic OS=Rattus norvegicus GN=Idh1 PE=1 SV=1	0	FALSE	39.296	13	5	59	2	414	46.7	6.99	228.4	5	metabolic process;regulation of biological process;response to stimulus	cytoplasm;cytosol;mitochondrion	catalytic activity;metal ion binding;nucleotide binding;protein binding	Pf00180	24479	ENSRNOG00000015020.7	Idh1	9	Glutathione metabolism; 2-Oxocarboxylic acid metabolism; Biosynthesis of amino acids; Peroxisome; Metabolic pathways; Citrate cycle (TCA cycle); Carbon metabolism	Glutathione metabolism	NADPH regeneration; Neutrophil degranulation	15	0	0.736	1.162	1.019	0.769	0.01						0.942	1.042	0.99	1.306	1.803	0.912	1	0.965	1.312	1.581
TRUE	High	Master Protein	Q5M970	Rab8a protein (Fragment) OS=Rattus norvegicus GN=Rab8a PE=2 SV=1	0	FALSE	39.229	22	3	44	1	152	17.5	9.32	142.01	3	cell organization and biogenesis;metabolic process;regulation of biological process;response to stimulus;transport	endosome;Golgi;membrane	catalytic activity;nucleotide binding;protein binding	Pf00025, Pf00071, Pf08477	117103		Rab8a	16				0	0	0.955	1.023	1.074	1.101	2.806
TRUE	High	Master Protein	B2RZ27	Protein Sh3bgrl3 OS=Rattus norvegicus GN=Sh3bgrl3 PE=4 SV=1	0	FALSE	39.189	31	3	34	3	93	10.5	5.14	117.29	3	cellular homeostasis;metabolic process;regulation of biological process	cytoplasm	catalytic activity	Pf00462, Pf04908	298544	ENSRNOG00000015967.5	Sh3bgrl3	5				0	0	0.784	0.894	0.902	0.905	0.01	0.785	0.893	0.953	0.835	0.01	0.742	0.85	0.961	0.722	0.01	0.892	0.932	0.952	0.936	1.714
TRUE	High	Master Protein	F1LNP8	Poliovirus receptor-related 1 OS=Rattus norvegicus GN=Pvrl1 PE=4 SV=2	0	FALSE	39.182	10	4	52	4	515	57.1	6.3	292.35	4	cell organization and biogenesis;cellular component movement;regulation of biological process;transport	membrane	protein binding;receptor activity	Pf07686, Pf08205, Pf13895, Pf13927	192183	ENSRNOG00000006403.7	Pvrl1; Nectin1	8	Adherens junction; Cell adhesion molecules (CAMs); Herpes simplex infection		Nectin/Necl trans heterodimerization	8	0	1.063	0.95	0.951	0.928	1.687	1.104	1.077	0.97	0.992	1.698	0.902	1.045	0.984	1.207	0.01	0.931	1.019	1.034	1.268	1.695
TRUE	High	Master Protein	F1M7Y3	Protein Rap1gds1 OS=Rattus norvegicus GN=Rap1gds1 PE=4 SV=2	0	FALSE	39.169	14	6	34	6	478	52.2	5.8	151.59	6	cell organization and biogenesis;cellular homeostasis;regulation of biological process;response to stimulus	cytosol;endoplasmic reticulum;mitochondrion	protein binding	Pf00514	310909	ENSRNOG00000015987.7	Rap1gds1	2				0	0	0.992	1.353	1.089	0.98	0.01	1.019	1.584	1.173	1.022	0.01	0.88	0.94	1.005	0.849	0.01	0.901	1.076	0.976	0.881	1.006
TRUE	High	Master Protein	M0R3K9	Protein LOC365828 (Fragment) OS=Rattus norvegicus GN=LOC365828 PE=4 SV=1	0	FALSE	39.125	25	4	46	1	206	21.8	7.77	137.9	4				Pf01965, Pf13278								0	0
TRUE	High	Master Protein	Q9QYU4	Ketimine reductase mu-crystallin OS=Rattus norvegicus GN=Crym PE=1 SV=1	0	FALSE	39.12	15	5	73	5	313	33.5	5.53	272.69	5	metabolic process;regulation of biological process;response to stimulus;transport	cytoplasm;cytosol;mitochondrion;nucleus	catalytic activity;nucleotide binding;protein binding	Pf01488, Pf02423, Pf03446	117024		Crym	1				0	0	1.073	1	1.04	1.078	1.242	0.938	1.012	1.046	0.997	0.449	0.967	0.979	1.007	0.97	1.503	0.981	0.959	1.013	0.985	0.828
TRUE	High	Master Protein	O08618	Phosphoribosyl pyrophosphate synthase-associated protein 2 OS=Rattus norvegicus GN=Prpsap2 PE=2 SV=1	0	FALSE	39.055	14	4	32	4	369	40.8	7.17	134.02	4	metabolic process		catalytic activity;metal ion binding	Pf13793, Pf14572	117272	ENSRNOG00000002724.7	Prpsap2	10				0	0											1.15	1.125	1.054	1.117	0.01	1.153	1.27	1.044	1.207	0.01
[truncated: 5,707 more rows]
[truncated: 206 more columns]
